# Supplementary material for: Synthesis and Application of a Perfluorinated Ammoniumyl Radical Cation as a Very Strong Deelectronator
Source: PubMed Central journal article supplement — Angew Chem Int Ed Engl. 2020 Apr 24;59(24):9453–9. doi: 10.1002/anie.202002768 (PMC7317951; doi:10.1002/anie.202002768), 2020-04-24
Supplement: ANIE-59-9453-s001.pdf [file ANIE-59-9453-s001.pdf]

## Supporting Information

### **Synthesis and Application of a Perfluorinated Ammoniumyl Radical Cation as a Very Strong Deelectronator**

*Marcel Schorpp, Tim Heizmann, Maximillian Schmucker, Stephan Rein, Stefan Weber, and Ingo Krossing\**

anie\_202002768\_sm\_miscellaneous\_information.pdf

To

# Innocence is Bliss: Synthesis and Application of a very strong Perfluorinated Ammoniumyl Radical Cation in Deelectronation Chemistry.

Marcel Schorpp,<sup>[a]</sup> Tim Heizmann<sup>[a]</sup>, Maximillian Schmucker<sup>[a]</sup>, Stephan Rein<sup>[b]</sup>, Stefan Weber<sup>[b]</sup>, Ingo Krossing\*<sup>[a]</sup>

<sup>[a]</sup> Institut für Anorganische und Analytische Chemie and Freiburger Materialforschungszentrum (FMF), Universität Freiburg, Albertstr. 21, 79104 Freiburg, Germany. <sup>[b]</sup> Institut für Physikalische Chemie, Universität Freiburg, Albertstr. 21, 79104 Freiburg, Germany. \*Correspondence to [krossing@uni-freiburg.de](mailto:krossing@uni-freiburg.de).

## Contents

|         |                                                                 |    |
|---------|-----------------------------------------------------------------|----|
| S-1     | Experimental Details and Characterisation Techniques.....       | 3  |
| S-2     | Experimental .....                                              | 4  |
| S-2.1   | Synthesis of $[N(C_6H_4Br-4)_3][Al(OR^F)_4]$ <b>S1</b> .....    | 4  |
| S-2.1.1 | Synthesis of <b>S1</b> by salt metathesis.....                  | 4  |
| S-2.1.2 | Synthesis of <b>S1</b> by oxidation with $Ag[Al(OR^F)_4]$ ..... | 5  |
| S-2.1.3 | Synthesis of <b>S1</b> by oxidation with $Br_2$ .....           | 5  |
| S-2.2   | Reactions between <b>S1</b> and $\sigma$ -Donor Ligands.....    | 7  |
| S-2.2.1 | Reaction between <b>S1</b> and DMAP.....                        | 7  |
| S-2.2.2 | Reaction between <b>S1</b> and IPr. ....                        | 9  |
| S-2.2.3 | Reaction between <b>S1</b> and $PPh_3$ .....                    | 12 |
| S-2.3   | Synthesis of starting materials .....                           | 13 |
| S-2.3.1 | Synthesis of $Ag[Al(OR^F)_4]$ .....                             | 13 |
| S-2.3.2 | Synthesis of trispyrazolylmethane $CHpZ_3$ .....                | 13 |
| S-2.3.3 | Synthesis of $[FeCp^*_2][Al(OR^F)_4]$ <b>S5</b> .....           | 13 |
| S-2.4   | Synthesis of Phenazin <sup>F</sup> <b>3</b> .....               | 14 |
| S-2.4.1 | Synthesis of $HNAr^F_2$ ( $Ar^F = C_6F_5$ ) <b>1</b> .....      | 14 |

|         |                                                                                                                                                                                                                                |     |
|---------|--------------------------------------------------------------------------------------------------------------------------------------------------------------------------------------------------------------------------------|-----|
| S-2.4.2 | Synthesis of solvent free $\text{LiNAr}^{\text{F}}_2$ <b>2</b> .....                                                                                                                                                           | 15  |
| S-2.4.3 | Synthesis of perfluoro-5,10-bis(perfluorophenyl)-5,10-dihydrophenazine <b>3</b> (phenazine <sup>F</sup> )<br>15                                                                                                                |     |
| S-2.5   | Synthesis of [phenazine <sup>F</sup> ][Al(OR <sup>F</sup> ) <sub>4</sub> ] <b>4</b> .....                                                                                                                                      | 18  |
| S-2.6   | Reaction between <b>4</b> and different substrates.....                                                                                                                                                                        | 21  |
| S-2.6.1 | Reaction between <b>4</b> and Sn in MeCN. Synthesis of [Sn(MeCN) <sub>5</sub> ][Al(OR <sup>F</sup> ) <sub>2</sub> ] <b>5</b> . ....                                                                                            | 21  |
| S-2.6.2 | Reaction between <b>4</b> and Sn in presence of trispyrazolymethane (CHpz <sub>3</sub> ). Synthesis of [Sn(CHpz <sub>3</sub> ) <sub>2</sub> ][Al(OR <sup>F</sup> ) <sub>4</sub> ] <b>6</b> .....                               | 23  |
| S-2.6.3 | Reaction between <b>4</b> and [FeCp* <sub>2</sub> ][Al(OR <sup>F</sup> ) <sub>4</sub> ] in oDFB under 3 atm of CO. Synthesis of [Fe(CO)Cp* <sub>2</sub> ][Al(OR <sup>F</sup> ) <sub>4</sub> ] <b>7</b> . ....                  | 27  |
| S-2.6.4 | Reaction between <b>4</b> and [FeCp* <sub>2</sub> ][Al(OR <sup>F</sup> ) <sub>4</sub> ] in oDFB in presence of excess <sup>t</sup> Bu-NC. Synthesis of [Fe(CN- <sup>t</sup> Bu)Cp* <sub>2</sub> ] <sup>2+</sup> <b>8</b> ..... | 31  |
| S-3     | Crystallographic data .....                                                                                                                                                                                                    | 36  |
| S-4     | Quantum chemical calculations .....                                                                                                                                                                                            | 117 |
| S-5     | References.....                                                                                                                                                                                                                | 133 |

## S-1 Experimental Details and Characterisation Techniques

All reactions and manipulations were carried out under an inert argon atmosphere, using standard Schlenk-line and glovebox techniques (box atmosphere kept below 1 ppm H<sub>2</sub>O/O<sub>2</sub>). Glassware has been stored over-night in an oven set to 180°C and flame dried under vacuum prior to use. Decamethyl ferrocene (Acros), Pyrazole (99%, ChemPUR), LiNH<sub>2</sub> (Acros), C<sub>6</sub>F<sub>6</sub> (fluorochem) were used as received. *tert*-Butylisocyanide (Sigma/Aldrich) was stored over activated 3 Å molecular sieves and then vacuum transferred to new flask to prepare 1 M stock solution with *o*DFB. Li[Al(OR<sup>F</sup>)<sub>4</sub>] was prepared following reported procedure<sup>[1]</sup>. Br<sub>2</sub> (99%, Acros) was vacuum transferred prior to use. I<sub>2</sub> (Acros) was sublimed under static vacuum. Pentane was collected from a solvent purification system (SPS) and oxygen removed by purging with Argon. PhF, *o*-DFB, CD<sub>2</sub>Cl<sub>2</sub>, hexane and heptane were refluxed/stirred over CaH<sub>2</sub> and distilled. All solvents were stored over activated 3 Å molecular sieves in gas tight ampoules.

**Powder Diffraction.** Powder diffractograms were recorded with the sample sealed with perfluoropolyalkylether oil (AB128330, abcr GmbH & Co. KG) in a 0.3 mm thick capillary (Hilgenberg GmbH, wall thickness 0.01 mm) at 100(10) K in the 2θ range 2.0-40.0° with a STOE STADI P powder diffractometer with Mo-K<sub>α1</sub> radiation (λ = 0.709300 Å) equipped with a Ge-(111) monochromator and Mythen 1K detector. Data acquiring, processing and the calculation of powder diffractograms from single-crystal data were performed using STOE WinXPOW<sup>®</sup> package. All powder diffractograms were background corrected.

**ATR-IR Spectroscopy.** ATR FT-IR spectra were recorded at ambient temperature on a ZnSe crystal on a FTIR Bruker ALPHA with a QuickSnap Platinum ATR sampling module inside an inert atmosphere glovebox. Spectra were recorded in a range from 4000-500 cm<sup>-1</sup>. The spectra were recorded with either 64 or 128 scans and a resolution of 2 cm<sup>-1</sup>. Data processing was carried out with the software package OPUS 7.5. For all spectra, signal intensity was normalised to one and the relative band intensities were described as follows: ≥ 0.8 = very very strong (vvs), ≥ 0.7 = very strong (vs), ≥ 0.6 = strong (s), ≥ 0.5 = medium strong (ms), ≥ 0.4 = medium (m), ≥ 0.3 = medium weak (mw), ≥ 0.2 = weak (w), ≥ 0.1 = very weak (vw), < 0.1 = very very weak (vvw).

**Single crystal X-ray diffraction.** Single crystal X-ray diffraction data were collected using either a Bruker SMART APEXII QUAZAR detector with fixed-Chi D8 Goniometer, INCOATEC Mo microsource or Bruker D8 VENTURE with PHOTONIII detector, fixed-Chi D8 Goniometer and INCOATEC Mo/Cu microsource. Crystals were selected under perfluoropolyether oil, mounted on 0.1 to 0.3 mm diameter CryoLoops and quench-cooled using an Oxford Cryostream 800 open flow N<sub>2</sub> cooling device.<sup>[2]</sup> Data were collected at 100 K using monochromated Cu K<sub>α</sub> or Mo K<sub>α</sub> radiation (λ = 1.5418/0.71073 Å). Data processing was done with SHELXS/XL and refined by least squares on weighted *F*<sub>2</sub> values for all reflections, disordering

of fragments was done with the help of the implemented DSR tool.<sup>[3]</sup> Graphical representations have been prepared using Olex2-1.2. Finalisation of gathered data was done using final cif tool.<sup>[4]</sup>

**NMR spectroscopy.** NMR samples were prepared inside an inert atmosphere glovebox in either flame sealable NMR tubes or NMR tubes equipped with a gas-tight J.Young valve. <sup>1</sup>H, <sup>13</sup>C, <sup>19</sup>F, <sup>27</sup>Al, <sup>31</sup>P-NMR spectra were acquired either on a Bruker Biospin Avance II+ 400 MHz WB, a Bruker Avance 200 MHz or a Bruker Avance III HD 300 MHz spectrometer. <sup>1</sup>H and <sup>13</sup>C NMR spectra are reported relative to TMS and were calibrated to residual solvent resonances.<sup>[5]</sup> Data analysis was performed using the Bruker TOPSPIN 3.5 software. The broad resonance at  $\delta = 70$  ppm observed in <sup>27</sup>Al-NMR spectra corresponds to a background from Al-nuclei in the probe head.

**EPR spectroscopy.** EPR spectroscopic measurements were carried out in the continuous wave (cw) mode at X-band frequency (9.7973 GHz), using a Bruker Elexsys E580 spectrometer equipped with a super-high-Q cavity (4119HS-W1). The experiment were performed at room temperature under liquid-state conditions (SO<sub>2</sub>) by using a microwave power of 0.04743 mW and a modulation amplitude of 0.05 mT. A home-written analysis program, which is based on the EasySpin simulation package, were used to determine the g-factor, hyperfine couplings and the intrinsic line-width parameter.

**Quantum Chemical Calculations.** All quantum chemical calculations were carried out with the TURBOMOLE program package using the BP86 functionals with def-SV(P) basis sets and D3(BJ) dispersion correction.<sup>[6]</sup> Vibrational frequencies were calculated using the AOFORCE-module.<sup>[7]</sup> All calculated structures were checked for consistency in terms of geometric conversion, sensible electron occupations and the absence of imaginary vibrational frequencies. Thermal contributions to the enthalpy and free energy of the systems were calculated with the FREEH application based on the analysis of the vibrations obtained by BP86/def-SV(P)/D3(BJ) calculations.

## S-2 Experimental

### S-2.1 Synthesis of [N(C<sub>6</sub>H<sub>4</sub>Br-4)<sub>3</sub>][Al(OR<sup>F</sup>)<sub>4</sub>] **S1**

#### S-2.1.1 Synthesis of **S1** by salt metathesis

[N(C<sub>6</sub>H<sub>4</sub>Br-4)<sub>3</sub>][SbCl<sub>6</sub>] (245 mg, 0.300 mmol) and Li[Al(OR<sup>F</sup>)<sub>4</sub>] (307 mg, 0.315 mmol, 1.05 eq.) have been dissolved in CH<sub>2</sub>Cl<sub>2</sub> (15 ml). The reaction mixture was stirred over night at ambient temperature. The supernatant deep blue solution has been filtered and CH<sub>2</sub>Cl<sub>2</sub> was removed under reduced pressure to yield a deep blue precipitate (350 mg, 0.242 mmol, 81%). Crystals suitable for single crystal XRD experiments were obtained upon layering of a solution of **S1** (35 mg) in CH<sub>2</sub>Cl<sub>2</sub> (3 ml) with hexane (15 ml).

$^{19}\text{F}$ -NMR (282.45 MHz,  $\text{CD}_2\text{Cl}_2$ , 298 K):  $\delta = -75.6$  (s, 36F,  $[\text{Al}\{\text{OC}(\text{CF}_3)\}_4]^-$ ) ppm.  $^{27}\text{Al}$ -NMR (78.22 MHz,  $\text{CD}_2\text{Cl}_2$ , 298 K):  $\delta = 34.6$  (s, 1Al,  $[\text{Al}\{\text{OC}(\text{CF}_3)\}_4]^-$ ) ppm. ESI-MS(source voltage: 20V) positive ion mode:  $m/z = 402.0$   $[\text{C}_{36}\text{H}_{24}\text{Br}_4\text{N}_2]^{2+}$  (**S2<sup>2+</sup>**), 480.8  $[\text{C}_{18}\text{H}_{12}\text{Br}_3\text{N}]^+$  (**S1**), 803.8  $[[\text{C}_{36}\text{H}_{24}\text{Br}_4\text{N}_2]^+]$  (**S2<sup>+</sup>**). negative ion mode:  $m/z = 966.9$   $[\text{F}_{36}\text{C}_{16}\text{O}_4\text{Al}]^-$ . ATR-FTIR:  $\nu = 3096$  (vw), 2567 (vw), 1560 (w), 1547 (m), 1486 (vw), 1476 (vw), 1418 (vw), 1352 (vw), 1296 (w), 1273 (m), 1239 (s), 1208 (vs), 1165 (s), 1065 (s), 969 (vs), 969 (vs), 914 (w), 830 (s), 809 (m), 755 (vw), 726 (vs), 617 (vw), 568 (w), 559 (w)  $\text{cm}^{-1}$

### S-2.1.2 Synthesis of **S1** by oxidation with $\text{Ag}[\text{Al}(\text{OR}^{\text{F}})_4]$

$\text{N}(\text{C}_6\text{H}_4\text{Br-4})_3$  (1.45 g, 3.00 mmol) and  $\text{Ag}[\text{Al}(\text{OR}^{\text{F}})_4]$  (3.22 g, 3.00 mmol, 1eq.) have been dissolved in  $\text{CH}_2\text{Cl}_2$  (6 ml). Upon addition of the solvent an intensive blue colour was observed. The reaction mixture was stirred over night at ambient temperature and then filtered *via* a G4 frit, the precipitate has been washed with  $\text{CH}_2\text{Cl}_2$  (3 x 6 ml). The solvent was removed under reduced pressure to yield the title compound **1** as a dark blue powder (4.18 g, 2.89 mmol, 96.2%).

ESI-MS(source voltage: 20V) positive ion mode:  $m/z = 402.2$   $[\text{C}_{36}\text{H}_{24}\text{Br}_4\text{N}_2]^{2+}$  (**S2<sup>2+</sup>**), 481.2  $[\text{C}_{18}\text{H}_{12}\text{Br}_3\text{N}]^+$  (**S1**). negative ion mode:  $m/z = 967.7$   $[\text{F}_{36}\text{C}_{16}\text{O}_4\text{Al}]^-$ . ATR-FTIR:  $\nu = 3101$  (vw), 2566 (vw), 1559 (w), 1548 (m), 1485 (vw), 1419 (vw), 1351 (vw), 1296 (w), 1273 (s), 1239 (s), 1209 (vs), 1168 (s), 1065 (s), 1010 (w), 1002 (w), 969 (vs), 914 (w), 830 (s), 810 (m), 755 (vw), 726 (vs), 617 (w), 559 (w)  $\text{cm}^{-1}$

### S-2.1.3 Synthesis of **S1** by oxidation with $\text{Br}_2$

Perfluorohexane (10 ml) has been added to a mixture of  $\text{N}(\text{C}_6\text{H}_4\text{Br-4})_3$  (0.339 g, 0.705 mmol) and  $\text{Li}[\text{Al}(\text{OR}^{\text{F}})_4]$  (0.686 g, 0.705 mmol, 1eq.). The reaction mixture was degassed by three freeze-pump-thaw cycles and  $\text{Br}_2$  (0.0563 g, 0.352 mmol, 0.5 eq.) was condensed onto the reaction mixture at  $-196$  °C. The reaction mixture was allowed to warm to  $-78$  °C and stirred for 30 min. As no colour change was observable the reaction mixture was allowed to warm to room temperature. Slow colour change from the starting orange solution to dark green was observed after 30 min. The reaction mixture was stirred over night to yield dark blue precipitate with supernatant colourless solution, which was filtered away *via* a G4 frit. The precipitate was washed with perfluorohexane (3 x 5 ml) and dissolved in  $\text{CH}_2\text{Cl}_2$  (6 ml). The dark blue solution was filtered and the solvent removed under reduced pressure to yield a dark blue powder contaminated with colourless powder. The powder was again washed with perfluorohexane (3x 5ml) dissolved in  $\text{CH}_2\text{Cl}_2$  (5 ml) stirred over-night and filtered. The solvent was removed under reduced pressure to yield the title compound **1** as a dark blue powder (0.520 g, 0.358 mmol, 50.9%).

ESI-MS(source voltage: 20V) positive ion mode:  $m/z = 402.0$   $[\text{C}_{36}\text{H}_{24}\text{Br}_4\text{N}_2]^{2+}$  (**S2<sup>2+</sup>**), 480.9  $[\text{C}_{18}\text{H}_{12}\text{Br}_3\text{N}]^+$  (**S1**), 803.8  $[[\text{C}_{36}\text{H}_{24}\text{Br}_4\text{N}_2]^+]$  (**S2<sup>+</sup>**). negative ion mode:  $m/z = 967.0$   $[\text{F}_{36}\text{C}_{16}\text{O}_4\text{Al}]^-$ . ATR-FTIR:  $\nu = 3088$  (w), 1897 (vw), 1579 (w), 1560 (w), 1548 (m), 1485 (s), 1424 (w), 1418 (w), 1352 (w), 1311 (m), 1282 (s),

1240 (vs), 1211 (vs), 1177 (s), 1169 (s), 1105 (w), 1066 (vs), 1002 (s), 971 (vs), 914 (w), 831 (m), 812 (vs), 755 (w), 726 (vs), 711 (m), 698 (w), 666 (m), 617 (w), 606 (w), 568 (w), 560 (m)  $\text{cm}^{-1}$

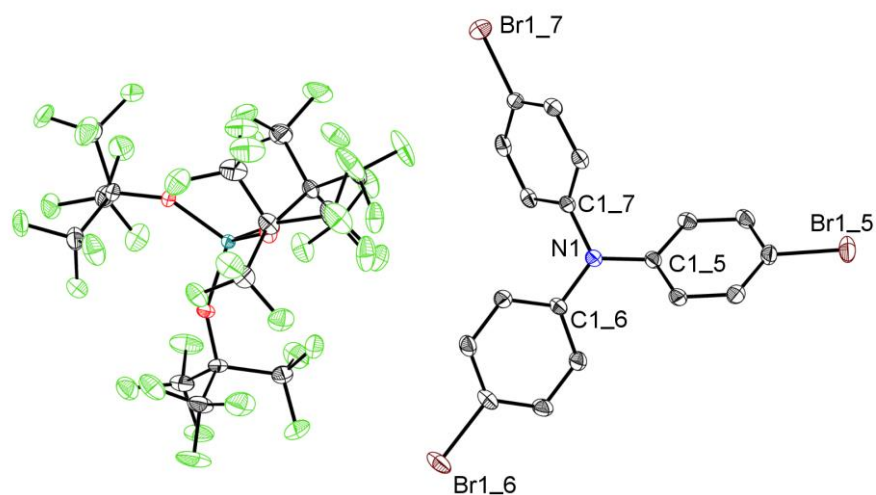

Figure S 1: Molecular structure of  $[\text{N}(\text{ArBr-4})_3][\text{Al}(\text{OR}^{\text{F}})_4]$  **1**. Thermal displacement ellipsoids set at 50 % probability. Protons omitted for clarity.

Table S 1: Selected interatomic distances and bond angles found in **1** compared to bond metrics reported by Quiroz-Guzman *et al.*<sup>[B]</sup>

| Interatomic distances [ $\text{\AA}$ ] |                                                                           |                                              |                             |
|----------------------------------------|---------------------------------------------------------------------------|----------------------------------------------|-----------------------------|
|                                        | $[\text{N}(\text{ArBr-4})_3][\text{Al}(\text{OR}^{\text{F}})_4]$ <b>1</b> | $[\text{N}(\text{ArBr-4})_3][\text{SbCl}_6]$ | $\text{N}(\text{ArBr-4})_3$ |
| N1–C1_5                                | 1.401(3)                                                                  | 1.409(6)                                     | 1.416(4)                    |
| N1–C1_6                                | 1.406(3)                                                                  | 1.410(6)                                     | 1.419(4)                    |
| N1–C1_7                                | 1.425(3)                                                                  | 1.414(6)                                     | 1.420(4)                    |
| Bond angles                            |                                                                           |                                              |                             |
|                                        | $[\text{N}(\text{ArBr-4})_3][\text{Al}(\text{OR}^{\text{F}})_4]$ <b>1</b> | $[\text{N}(\text{ArBr-4})_3][\text{SbCl}_6]$ | $\text{N}(\text{ArBr-4})_3$ |
| C1_5–N1–C1_6                           | 123.2(2)                                                                  | 121.1(4)                                     | 122.4(3)                    |
| C1_5–N1–C1_7                           | 118.2(2)                                                                  | 119.3(4)                                     | 119.3(3)                    |
| C1_6–N1–C1_7                           | 118.3(2)                                                                  | 119.6(4)                                     | 118.2(3)                    |

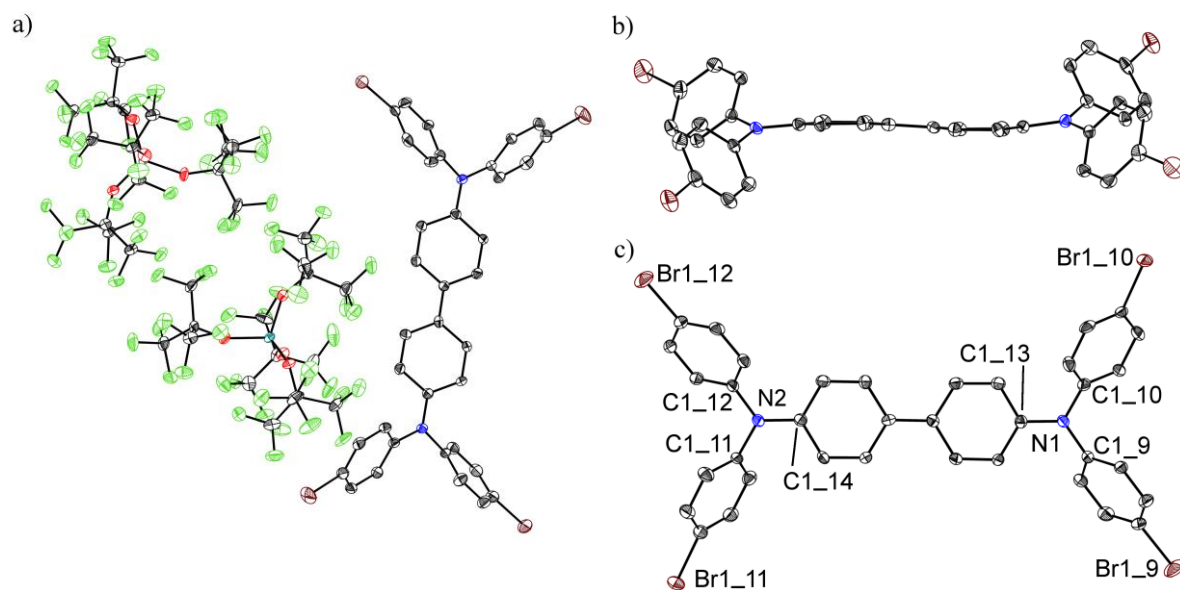

Figure S 2: Molecular structure of a)  $[(\mu\text{-C}_{12}\text{H}_8)\{\text{N}(\text{ArBr-4})_2\}_2][\text{Al}(\text{OR}^{\text{F}})_4]_2$  **S2** and molecular structure of the cation in b) side-on and c) top-down view. Thermal displacement ellipsoids set at 50 % probability. Protons omitted for clarity.

Table S 2: Selected interatomic distances and bond angles found in **S2**.

| Interatomic distances [Å] |          | Bond angles    |          |
|---------------------------|----------|----------------|----------|
| N2–C1_12                  | 1.425(5) | C1_14–N2–C1_11 | 119.1(3) |
| N2–C1_11                  | 1.445(5) | C1_14–N2–C1_12 | 124.0(3) |
| N2–C1_14                  | 1.353(5) | C1_12–N2–C1_11 | 116.8(3) |
| N1–C1_10                  | 1.426(5) | C1_13–N1–C1_10 | 122.2(3) |
| N1–C1_9                   | 1.427(5) | C1_13–N1–C1_9  | 119.7(4) |
| N1–C1_13                  | 1.356(5) | C1_10–N1–C1_9  | 118.0(3) |

## S-2.2 Reactions between **S1** and $\sigma$ -Donor Ligands

### S-2.2.1 Reaction between **S1** and DMAP

DMAP (25 mg, 205  $\mu\text{mol}$ , 1.12 eq.) dissolved in *o*-DFB (3 ml) was added to a stirred solution of **S1** (267 mg, 0.184 mmol) in *o*-DFB (3 ml). A quick colour change from opaque dark blue to translucent orange-red was observed after completed addition. The solvent was removed under reduced pressure and pentane (10 ml) was added to the dark red-brown residual oil. The mixture was stirred over-night. The supernatant pentane solution was filtered. The beige brown precipitate was washed with pentane (5 ml) and redissolved in *o*-DFB (3 ml) to give a cloudy orange-red solution. Colourless single crystals suitable for single crystal X-ray diffraction analysis were grown by layering of a solution of the washed products with hexanes (15 ml).



$^1\text{H-NMR}$  (400.16 MHz,  $\text{CD}_2\text{Cl}_2$ , 298 K): unknown comp. 1  $\delta = 7.94$  (m, AA'BB', Pyr-H), 6.764 (m, AA'BB', Pyr-H), 3.22 (s,  $\text{N}(\text{CH}_3)_2$ ) ppm. unknown comp. 2  $\delta = 8.363$  (m, AA'BB', Pyr-H), 6.758 (m, AA'BB', Pyr-H), 3.22 (s,  $\text{N}(\text{CH}_3)_2$ ) ppm. unknown comp 3  $\delta = 7.75$  (m, AA'BB', 6.79 (m, AA'BB', Pyr-H), 3.25 (s,  $\text{N}(\text{CH}_3)_2$ ) ppm. unknown comp 4  $\delta = 7.48$  (m, AA'BB', Pyr-H), 6.55 (m, AA'BB', Pyr-H), 5.60 (s,  $\text{N}(\text{CH}_3)\text{CH}_n\text{X}_{3-n}$  ( $n = 1,2$ )), 3.22 (s,  $\text{N}(\text{CH}_3)\text{CH}_n\text{X}_{3-n}$  ( $n = 1,2$ )), unknown comp 5  $\delta = 7.34$  (m, AA'BB'), 6.73 (m, AA'BB') ppm.  $^{13}\text{C-NMR}$  (100.62 MHz,  $\text{CD}_2\text{Cl}_2$ , 298 K): unknown comp. 1  $\delta = 139.9$  (Pyr), 107.6 (Pyr), 40.1 ( $\text{N}(\text{CH}_3)_2$ ) ppm. unknown compound 2  $\delta = 149.9$  (Pyr), 107.6 (Pyr) ppm. unknown compound 3  $\delta = 137.9$  (Pyr), 108.5 (Pyr), 40.43 ( $\text{N}(\text{CH}_3)_2$ ) ppm. unknown compound 4  $\delta = 141.79$  (Pyr), 107.5 (Pyr), 72.43 ( $\text{N}(\text{CH}_3)(\text{CH}_n\text{X}_{3-n}$  ( $n = 1,2$ ))), 37.86 ( $(\text{N}(\text{CH}_3)(\text{CH}_n\text{X}_{3-n}$  ( $n = 1,2$ ))) ppm. unknown compound 5  $\delta = 132.82$  (Ar-H), 124.25 (Ar-H) ppm.  $^{19}\text{F-NMR}$  (282.45 MHz,  $\text{CD}_2\text{Cl}_2$ , 298 K):  $\delta = -75.8$  (s, 36F,  $[\text{Al}\{\text{OC}(\text{CF}_3)\}_4]^-$ ) ppm.  $^{27}\text{Al-NMR}$  (78.22 MHz,  $\text{CD}_2\text{Cl}_2$ , 298 K):  $\delta = 34.6$  (s, 1Al,  $[\text{Al}\{\text{OC}(\text{CF}_3)\}_4]^-$ ) ppm. ESI-MS(source voltage: 20V) positive ion mode:  $m/z = 123.1$  [ $\text{C}_7\text{H}_{11}\text{N}_2$ ] $^+$ , 164.1 [ $\text{C}_9\text{H}_{14}\text{N}_3$ ] $^+$ , 243.2 [ $\text{C}_{14}\text{H}_{19}\text{N}_4$ ] $^+$ , 604.0 [ $\text{C}_{25}\text{H}_{21}\text{Br}_3\text{N}_3$ ] $^+$  (**2a**). negative ion mode:  $m/z = 967.0$  [ $\text{F}_{36}\text{C}_{16}\text{O}_4\text{Al}$ ] $^-$ .

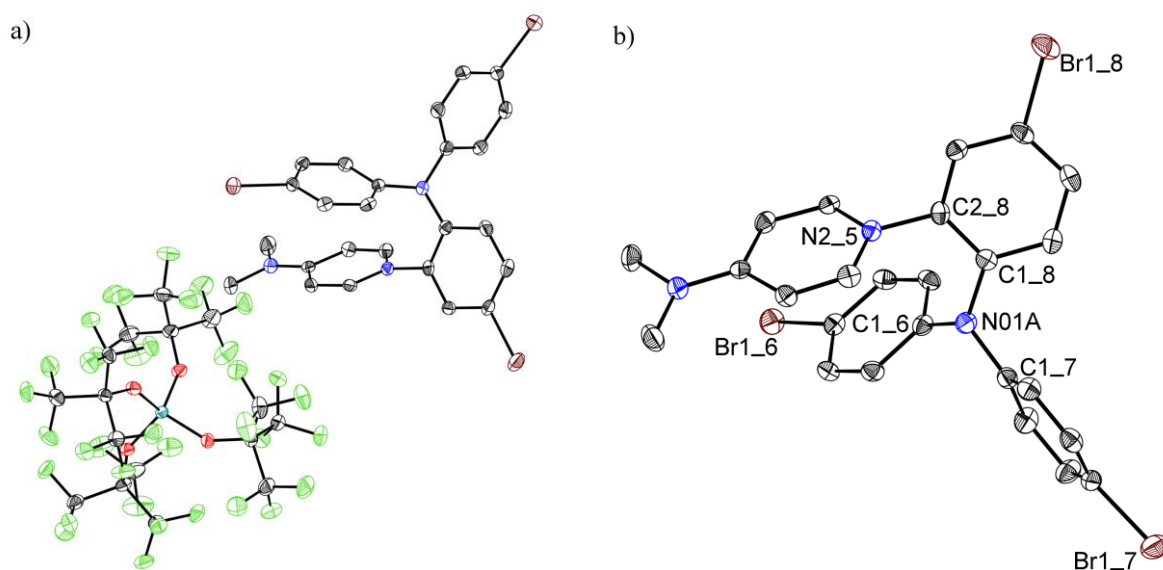

Figure S 3: Molecular structure of a) DMAP magic blue substitution product **53** and b) structure of the cation. Thermal displacement ellipsoids set at 50 % probability. Protons omitted for clarity.

Table S 3 Selected interatomic distances and bond angles in **53**.

| Bond distances [Å] |          | Bond angles    |          |
|--------------------|----------|----------------|----------|
| N01A–C1_8          | 1.418(4) | C1_8–N01A–C1_6 | 116.7(2) |
| N01A–C1_6          | 1.429(4) | C1_8–N01A–C1_7 | 118.8(2) |
| N01A–C1_7          | 1.432(4) | C1_6–N01A–C1_7 | 119.1(2) |
| N2_5–C2_8          | 1.443(4) |                |          |

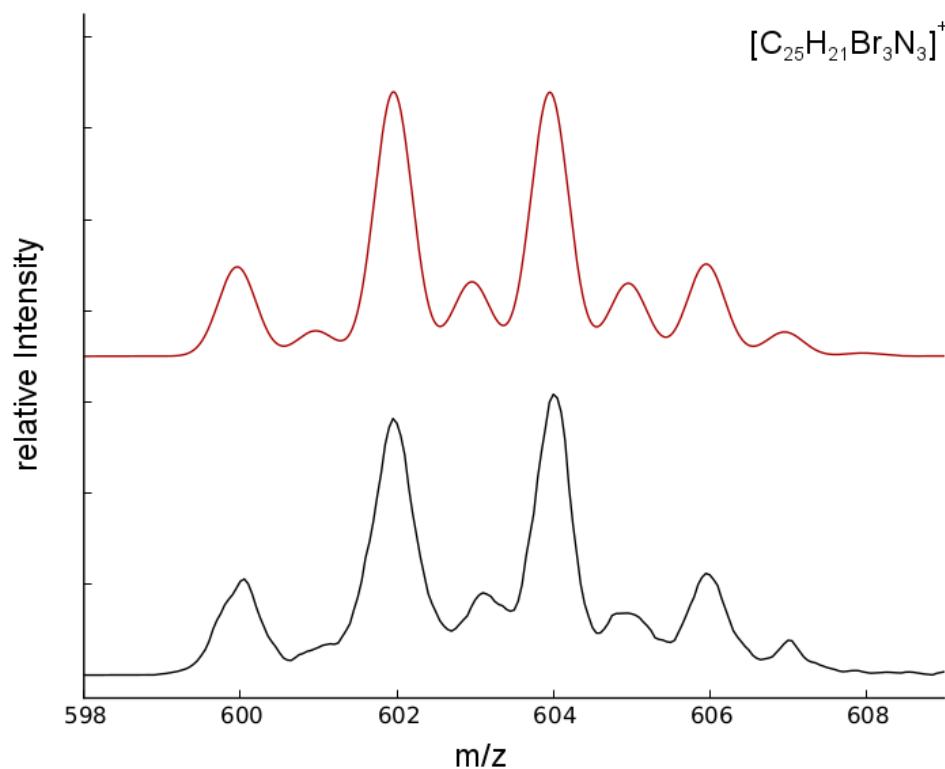

Figure S 4: Simulated (red) and found (black) isotope pattern of the DMAP magic blue substitution product **S3**.

#### S-2.2.2 Reaction between **S1** and IPr.

IPr (78 mg, 0.200 mmol) and **S1** (272 mg, 0.188 mmol, 0.94 eq.) have been dissolved in Et<sub>2</sub>O under stirring at ambient temperature. A quick colour change from opaque dark blue to translucent orange-red was observed upon addition of the solvent. The solvent was removed under reduced pressure and the resulting dark brown oil was washed with pentane (3 x 5 ml) and dried under vacuum. The dark brown oil was dissolved in *o*-DFB (3 ml) and layered with pentane (10 ml). The product oiled out overnight. After inverting the layer tube light orange crystals suitable for X-ray diffraction analysis were obtained.

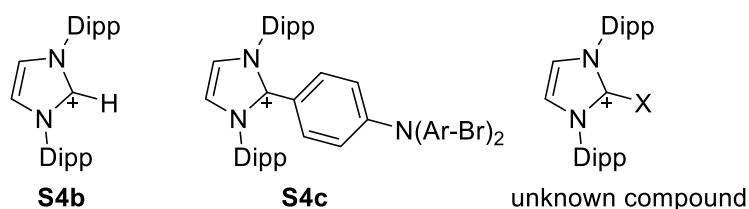

Figure S 5: Major products assignable by NMR spectroscopy.

<sup>1</sup>H-NMR (400.16 MHz, CD<sub>2</sub>Cl<sub>2</sub>, 298 K): comp. **S4b** δ = 8.30 (t, <sup>4</sup>J = 1.6 Hz, 1H, –N–CH–N–), 7.68 (t, <sup>3</sup>J = 7.9 Hz, 4H, *p*(Dipp)–CH), 7.62 (d, <sup>4</sup>J = 1.6 Hz, 2H, –N–(CH)<sub>2</sub>–N–), 7.46 (d, <sup>3</sup>J = 7.9 Hz, 8H, *m*(Dipp)–CH), 2.38 (sept, <sup>3</sup>J = 6.9 Hz, 4H, –CH(CH<sub>3</sub>)<sub>2</sub>), 1.32 (d, <sup>3</sup>J = 6.9 Hz, 12H, –CH(CH<sub>3</sub>)<sub>2</sub>), 1.24 (d, <sup>3</sup>J = 6.9 Hz,

12H,  $-\text{CH}(\text{CH}_3)_2$ ) ppm. comp. **S4c**  $\delta$  = 7.63 (t,  $^3J$  = 7.9 Hz, 4H,  $p(\text{Dipp})-\text{CH}$ ), 7.46 (s, 2H,  $-\text{N}-(\text{CH})_2-\text{N}-$ ), 7.42 (m, AA'BB', 4H,  $m(\text{N}(\text{ArBr}-4)_2)-\text{CH}$ ), 7.40 (d,  $^3J$  = 7.9 Hz, 8H,  $m(\text{Dipp})-\text{CH}$ ), 6.84 (m, AA'BB', 4H,  $o(\text{N}(\text{ArBr}-4)_2)-\text{CH}$ ), 6.71 (m, AA'BB', 2H,  $m(\text{IPr}-\text{C}_6\text{H}_4-\text{N})-\text{CH}$ ), 6.67 (m, AA'BB', 2H,  $o(\text{IPr}-\text{C}_6\text{H}_4-\text{N})-\text{CH}$ ), 2.43 (sept,  $^3J$  = 6.8 Hz, 4H,  $-\text{CH}(\text{CH}_3)_2$ ), 1.26 (d,  $^3J$  = 6.8 Hz, 12H,  $-\text{CH}(\text{CH}_3)_2$ ), 1.06 (d,  $^3J$  = 6.8 Hz, 12H,  $-\text{CH}(\text{CH}_3)_2$ ) ppm. unknown comp.  $\delta$  = 7.732 (t,  $^3J$  = 7.9 Hz, 4H,  $p(\text{Dipp})-\text{CH}$ ), 7.730 (s, 2H,  $-\text{N}-(\text{CH})_2-\text{N}-$ ), 7.49 (d,  $^3J$  = 7.9 Hz), 2.27 (sept, 4H,  $^3J$  = 6.9 Hz,  $-\text{CH}(\text{CH}_3)$ ), 1.29 (d, 12H,  $^3J$  = 6.9 Hz,  $-\text{CH}(\text{CH}_3)$ ), 1.29 (d, 12H,  $^3J$  = 6.9 Hz,  $-\text{CH}(\text{CH}_3)$ ) ppm.  $^{13}\text{C}$ -NMR (100.62 MHz,  $\text{CD}_2\text{Cl}_2$ , 298 K): comp. **S4b**  $\delta$  = 144.9 ( $o(\text{Dipp})-\text{C}-\text{CH}(\text{CH}_3)$ ), 136.6 ( $-\text{N}-\text{CH}-\text{N}-$ ), 133.52 ( $p(\text{Dipp})-\text{CH}$ ), 126.2 ( $-\text{N}-(\text{CH})_2-\text{N}-$ ), 125.5 ( $m(\text{Dipp})-\text{CH}$ ), 29.4 ( $-\text{C}(\text{CH}_3)_2$ ), 24.3 ( $-\text{C}(\text{CH}_3)_2$ ), 23.3 ( $-\text{C}(\text{CH}_3)_2$ ) ppm. comp **S4c**  $\delta$  = 150.9 ( $p(\text{IPr}-\text{C}_6\text{H}_4-\text{N})-\text{C}$ ), 145.9 ( $-\text{N}-\text{C}(\text{C}_6\text{H}_4\text{N}(\text{ArBr}-4)_2)-\text{N}-$ ), 144.5 ( $o(\text{Dipp})-\text{C}-\text{CH}(\text{CH}_3)$ ), 143.9 ( $ipso(-\text{N}(\text{C}_6\text{H}_4\text{Br}))-\text{CBr}$ ), 133.6 ( $m(-\text{N}(\text{C}_6\text{H}_4\text{Br}))-\text{CH}$ ), 132.9 ( $p(\text{Dipp})-\text{CH}$ ), 130.2 ( $m(\text{IPr}-\text{C}_6\text{H}_4-\text{N})-\text{CH}$ ), 127.7 ( $o(-\text{N}(\text{C}_6\text{H}_4\text{Br}))-\text{CH}$ ), 126.0 ( $m(\text{Dipp})-\text{CH}$ ), 125.2 ( $-\text{N}-(\text{CH})_2-\text{N}-$ ), 119.0 ( $o(\text{IPr}-\text{C}_6\text{H}_4-\text{N})-\text{CH}$ ), 118.9 ( $p(-\text{N}(\text{C}_6\text{H}_4\text{Br}))-\text{CN}-$ ), 110.9 ( $ipso(\text{IPr}-\text{C}_6\text{H}_4-\text{N})-\text{CN}-$ ), 29.4 ( $-\text{C}(\text{CH}_3)_2$ ), 24.7 ( $-\text{C}(\text{CH}_3)_2$ ), 22.1 ( $-\text{C}(\text{CH}_3)_2$ ) ppm. unknown compound  $\delta$  = 144.9 ( $o(\text{Dipp})-\text{C}-\text{CH}(\text{CH}_3)_2$ ), 133.8 ( $p(\text{Dipp})-\text{CH}$ ), 127.2 ( $-\text{N}-(\text{CH})_2-\text{N}-$ ), 125.8 ( $m(\text{Dipp})-\text{CH}$ ), 29.7 ( $-\text{CH}(\text{CH}_3)_2$ ), 23.9 ( $-\text{CH}(\text{CH}_3)_2$ ), 22.8 ( $-\text{CH}(\text{CH}_3)_2$ ) ppm.  $^{15}\text{N}$ -NMR (40.54 MHz,  $\text{CD}_2\text{Cl}_2$ , 273 K): comp **S4b**  $\delta$  = 185.5 ( $-\text{N}-(\text{CH})_2-\text{N}-$ ) ppm. comp **S4c**  $\delta$  = 176.4 ( $-\text{N}-(\text{CH})_2-\text{N}-$ ), 104.7 ( $\text{IPr}-\text{C}_6\text{H}_4-\text{N}(\text{ArBr}-4)_2$ ) ppm. unknown compound  $\delta$  = 188.9 ( $-\text{N}-(\text{CH})_2-\text{N}-$ ) ppm.  $^{19}\text{F}$ -NMR (376.54 MHz,  $\text{CD}_2\text{Cl}_2$ , 298 K):  $\delta$  = -75.7 (s, 36F,  $[\text{Al}\{\text{OC}(\text{CF}_3)\}_4]^-$ ) ppm.  $^{27}\text{Al}$ -NMR (104.27 MHz,  $\text{CD}_2\text{Cl}_2$ , 298 K):  $\delta$  = 34.6 (s, 1Al,  $[\text{Al}\{\text{OC}(\text{CF}_3)\}_4]^-$ ) ppm. ESI-MS(source voltage: 20V) positive ion mode:  $m/z$  = 389.4  $[\text{C}_{27}\text{H}_{37}\text{N}_2]^+$  (**S4b**), 467.2  $[\text{C}_{27}\text{H}_{36}\text{BrN}_2]^+$ , 628.7  $[\text{C}_{72}\text{H}_{82}\text{Br}_3\text{N}_5]^{2+}$ , 790.2  $[\text{C}_{45}\text{H}_{48}\text{Br}_2\text{N}_3]^+$  (**3c**), 868.1  $[\text{C}_{45}\text{H}_{47}\text{Br}_3\text{N}_3]^+$  (**S4**). negative ion mode:  $m/z$  = 967.0  $[\text{F}_{36}\text{C}_{16}\text{O}_4\text{Al}]^-$   $m/z$

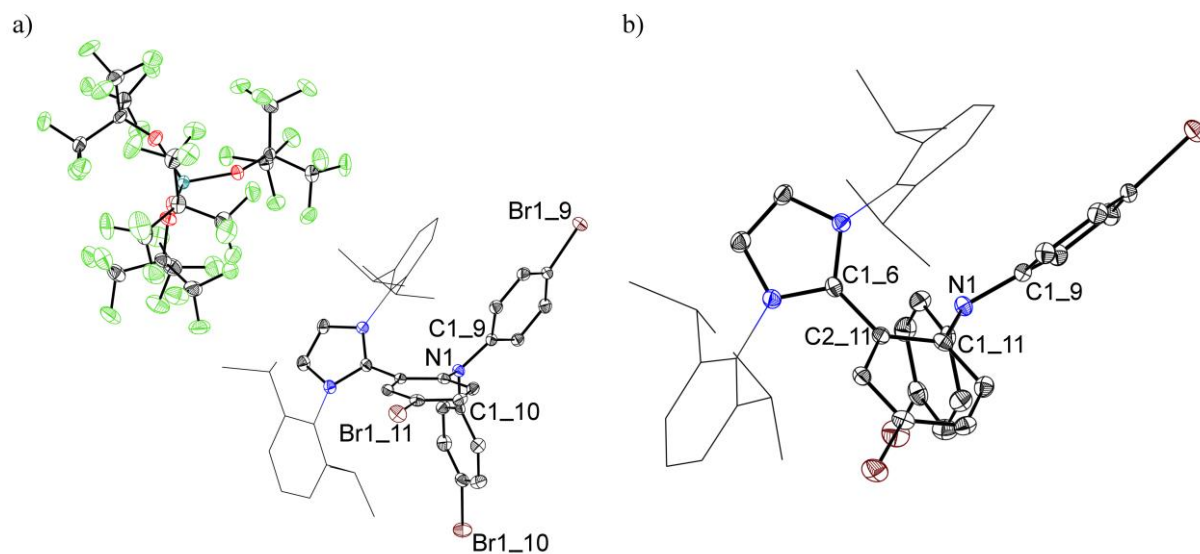

Figure S 6: Molecular structure of a) IPr magic blue substitution product **S4** and b) structure of the cation. Thermal displacement ellipsoids set at 50 % probability. Dipp groups drawn as wireframe and Protons omitted for clarity.

Table S 4: Selected interatomic distances and bond angles in **S4**.

| Interatomic distances [Å] |          | Bond angles    |            |
|---------------------------|----------|----------------|------------|
| N1–C1_9                   | 1.430(3) | C1_9–N1–C1_11  | 117.31(17) |
| N1–C1_11                  | 1.431(3) | C1_9–N1–C1_10  | 118.33(17) |
| N1–C1_10                  | 1.449(3) | C1_11–N1–C1_10 | 113.26(17) |
| C1_6–C2_11                | 1.478(3) |                |            |

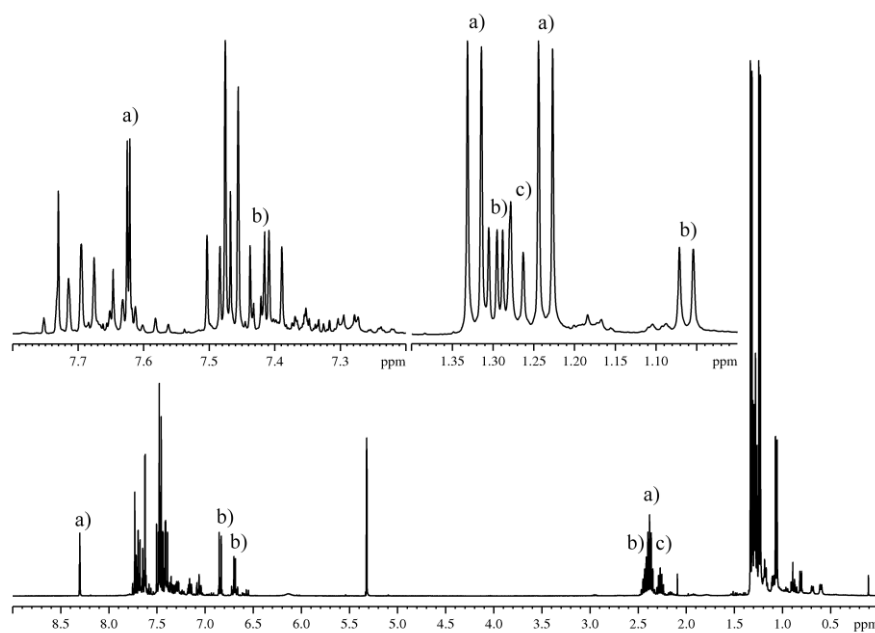

Figure S 7:  $^1\text{H-NMR}$  (400.17 MHz,  $\text{CD}_2\text{Cl}_2$ , 298 K) spectrum of isolated crystals. Selected resonances have been assigned to the three major products a), b) and c) (**Fehler! Verweisquelle konnte nicht gefunden werden.**) for clarification.

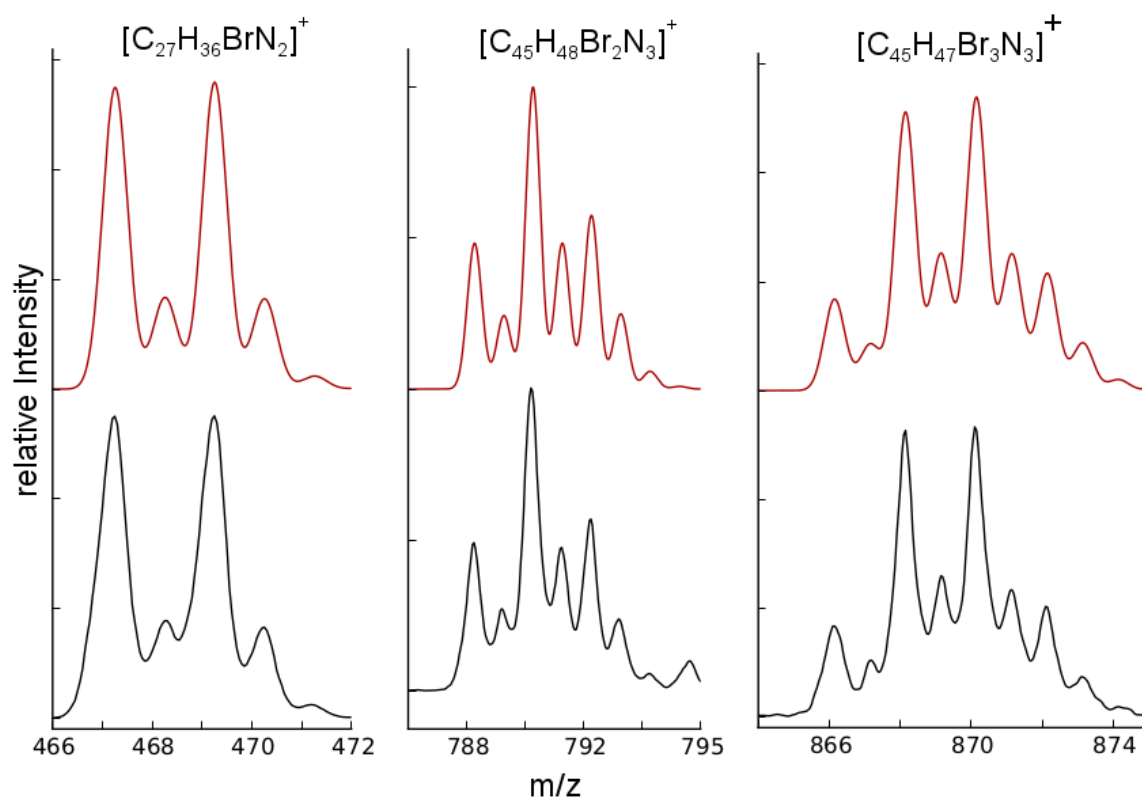

Figure S 8: Selected simulated (red) and found (black) isotopic distribution patterns for [IPr-Br]<sup>+</sup> (left), **S4c** (middle), and **S4** (right).

### S-2.2.3 Reaction between **S1** and PPh<sub>3</sub>

PPh<sub>3</sub> (52 mg, 0.200 mmol) and **S1** (278 mg, 0.192 mmol, 0.96 eq.) have been weighed into a H-cell equipped with a G4 frit, and dissolved in CH<sub>2</sub>Cl<sub>2</sub> (4 ml) under stirring at ambient temperature. Upon addition of the solvent a rapid colour change from dark opaque blue to bright yellow was observed within a minute. After complete colour change the solvent was removed under reduced pressure. The bright yellow residue was washed with pentane (3 x 5 ml). The collected pentane extract was freed from volatiles under reduced pressure to yield a colourless powder, which was shown by <sup>1</sup>H and <sup>31</sup>P-NMR to consist of PPh<sub>3</sub> and N(ArBr-4)<sub>3</sub>. The bright yellow residue was redissolved in CH<sub>2</sub>Cl<sub>2</sub> to yield a cloudy bright yellow solution, which was filtered into another vessel and concentrated under reduced pressure. Crystals suitable for scXRD were grown from the concentrated solution at -40 °C.

<sup>1</sup>H{<sup>31</sup>P}-NMR (400.16 MHz, CD<sub>2</sub>Cl<sub>2</sub>, 298 K): [Ph<sub>3</sub>POEt]<sup>+</sup> δ = 7.78 (m, Ph-H), 7.75 (m, Ph-H), 7.69 (m, Ph-H), 4.29 (q, <sup>3</sup>J = 7.1 Hz, 2H, -OCH<sub>2</sub>-), 1.50 (t, <sup>3</sup>J = 7.1 Hz, 3H, -OCH<sub>2</sub>-CH<sub>3</sub>) ppm. N(ArBr-4)<sub>3</sub> δ = 7.37 (m, AA'BB', 6H, N(C<sub>6</sub>H<sub>4</sub>Br)), 6.94 (m, AA'BB', 6H, N(C<sub>6</sub>H<sub>4</sub>Br)) ppm. unknown compound δ = 7.88 (m, Ph-H), 7.72 (m, Ph), 7.53 (br. s, AA'BB'), 7.29 (m, Ph), 7.12 (m, AA'BB', 1,2-X<sub>2</sub>C<sub>6</sub>H<sub>4</sub>) ppm. <sup>31</sup>P-NMR (161.99 MHz, CD<sub>2</sub>Cl<sub>2</sub>, 273 K): [Ph<sub>3</sub>POEt]<sup>+</sup> δ = 62.1 (s, [Ph<sub>3</sub>POEt]<sup>+</sup>) ppm. unknown compound δ = 22.1 (s) ppm. not assignable resonances δ = 43.5 (br.s), 22.9 (s), 22.7 (s), 21.4 (s), 8.8 (br. s), 7.6 (br. s) ppm. <sup>19</sup>F-NMR (376.54 MHz, CD<sub>2</sub>Cl<sub>2</sub>, 298 K): δ = -75.7 (s, 36F, [Al{OC(CF<sub>3</sub>)<sub>4</sub>}]<sup>-</sup>) ppm. <sup>27</sup>Al-NMR (104.27 MHz, CD<sub>2</sub>Cl<sub>2</sub>, 298 K): δ = 34.6 (s, 1Al, [Al{OC(CF<sub>3</sub>)<sub>4</sub>}]<sup>-</sup>) ppm. ESI-MS(source voltage: 20V) positive ion mode:

$m/z = 263.1 [C_{18}H_{16}P]^+$ ,  $279.1 [C_{18}H_{16}OP]^+$ ,  $307.1 [C_{20}H_{20}OP]^+$ ,  $557.2 [C_{36}H_{31}O_2P_2]^+$ ,  $664.0 [C_{36}H_{27}Br_2NP]^+$ .  
negative ion mode:  $m/z = 967.0 [F_{36}C_{16}O_4Al]^-$ .

## S-2.3 Synthesis of starting materials

### S-2.3.1 Synthesis of $Ag[Al(OR^F)_4]$

$Li[Al(OR^F)_4]$  (10.7 g, 11.0 mmol) and  $AgF$  (2.79 g, 22.0 mmol, 2.00 eq.) have been weighed into an H-cell equipped with a G4 frit.  $SO_2$  (~10 ml) has been condensed at  $-78^\circ C$  onto the reaction mixture. The coffee brown solution was stirred for 9 days at ambient temperature, until the colour noticeably brightened. The mixture was allowed to settle and the supernatant solution filtered over the G4 frit. The filter residue was washed by recondensing  $SO_2$  at  $-78^\circ C$  and filtering away from the residue. After three washing cycles the solvent has been condensed back into to the stock bottle, residual solvent was removed under reduced pressure and the title compound was received as a colourless powder (10.4 g, 9.69 mmol, 88.1%).

$^{19}F$ -NMR (282.45 MHz,  $CD_2Cl_2/Et_2O$ , 298 K):  $\delta = -75.6$  (s, 36F,  $[Al\{OC(CF_3)\}_4]^-$ ) ppm.  $^{27}Al$ -NMR (78.22 MHz,  $CD_2Cl_2/Et_2O$ , 298 K):  $\delta = 34.6$  (s, 1Al,  $[Al\{OC(CF_3)\}_4]^-$ ) ppm.

### S-2.3.2 Synthesis of trispyrazolylmethane $CHpz_3$

Pyrazole (12 g, 176 mmol) and  $NBu_4Br$  (2.8, 8.8 mmol, 5 mol %) were suspended in  $H_2O$  (300 ml).  $Na_2CO_3$  (114 g, 1075 mmol, 6.1 eq.) were added under vigorous stirring. The reaction mixture was stirred for 1 h at ambient temperature. Then  $CHCl_3$  (90 ml) was added and the mixture refluxed at  $70^\circ C$  for 3 d. The reaction mixture was filtered and  $Et_2O$  (300 ml) added to the filtrate. The aqueous phase was separated, extracted with  $Et_2O$  (3 x 50 ml). The combined organic phases were washed with water (3 x 100 ml), brine (100 ml), dried over  $MgSO_4$  and charcoal. The solvent of the filtered colourless solution was removed at reduced pressure and leftover pyrazole removed by sublimation at  $80^\circ C$ .  $CHpz_3$  was obtained as colourless solid (7.31 g, 58.8 mmol, 58 %).

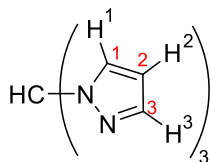

$^1H$ -NMR (300.18 MHz,  $CD_3CN$ , 298 K):  $\delta = 8.54$  (s, 1 H,  $HCpz_3$ ), 7.68 (m, 3 H, pz  $H^3$ ), 7.63 (m, 3 H, pz  $H^1$ ), 6.39 (m, 3 H, pz  $H^2$ ) ppm.  $^{13}C$ -NMR (75.48 MHz,  $CD_3CN$ , 298 K):  $\delta = 141.6$  (s, pz  $C^3$ ), 129.8 (s, pz  $C^1$ ), 107.0 (s, pz  $C^2$ ), 82.7 (s,  $HCpz_3$ ).

### S-2.3.3 Synthesis of $[FeCp^*_2][Al(OR^F)_4]$ **S5**

$FeCp^*_2$  (0.23 g, 0.70 mmol) was dissolved in  $CH_2Cl_2$  (4 ml) and added to a solution of  $NO[Al(OR^F)_4]$  (0.70 g, 0.70 mmol) in  $CH_2Cl_2$  (8 ml) at ambient temperature and stirred for 3 h. The solvent was

removed under reduced pressure and the dark green precipitate washed with n-pentane (3 x 6 ml).  $[\text{FeCp}^*_2][\text{Al}(\text{OR}^F)_4]$  was received as green solid (0.89 g, 0.69 mmol, 98 %). Crystals suitable for X-ray diffraction analysis were grown from concentrated  $\text{CH}_2\text{Cl}_2$  solutions by layering with n-pentane (see Figure S 9).

The obtained crystals showed severe super structure as visible by large cell containing in total 24 formula units. Because of the poor quality of the obtained structure ( $wR_2 = 0.38$ ) we decided to not upload the data to the CCDC. The obtained model was only used for simulation powder XRD pattern for phase purity analysis of **S5**.

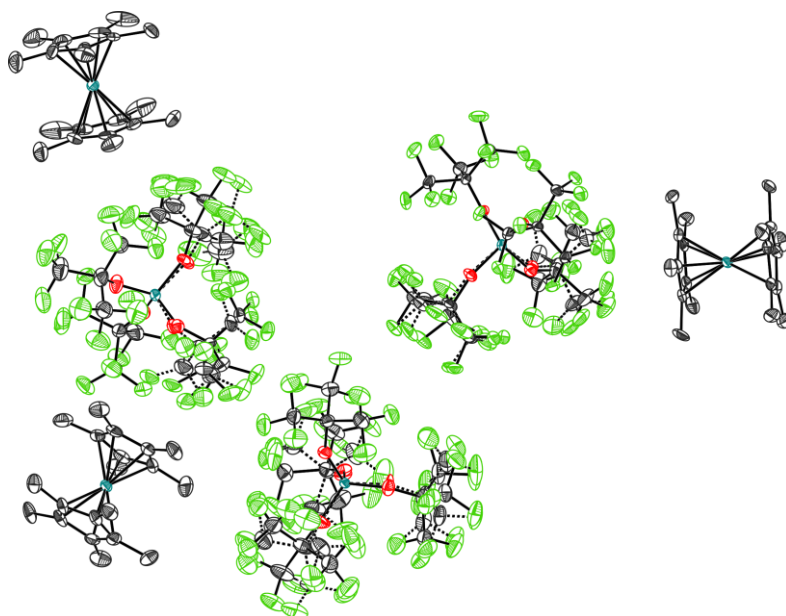

Figure S 9 asymmetric unit of crystals of  $[\text{FeCp}^*_2][\text{Al}(\text{OR}^F)_4]$ . H-atoms omitted for clarity. All disordered components shown. Thermal displacement ellipsoids set at 50% probability. Please note that collected crystals most likely contains a super structure as visible by large cell, poor refinement quality ( $wR_2 = 0.38$ ) and residual electron density mostly in the anionic part which can not easily be modelled by additional disorder.

## S-2.4 Synthesis of Phenazin<sup>F</sup> **3**

### S-2.4.1 Synthesis of $\text{HNAr}^F_2$ ( $\text{Ar}^F = \text{C}_6\text{F}_5$ ) **1**

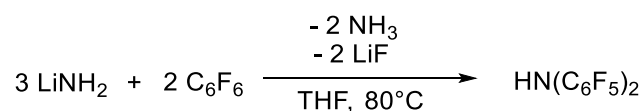

$\text{LiNH}_2$  (10.0 g, 436 mmol) was suspended in THF (100 ml).  $\text{C}_6\text{F}_6$  (42.2 ml, 366 mmol, 0.84 eq.) were slowly added at  $0^\circ\text{C}$  and the reaction mixture stirred for 30 min at this temperature and then heated for reflux for 9 h. First  $\text{Et}_2\text{O}$  (100 ml) and then HCl (10%, 100ml) were added to the dark brown reaction mixture. The organic layer was separated and the aqueous layer extracted with  $\text{Et}_2\text{O}$  (3 x 50 ml). The combined organic phases were washed with  $\text{H}_2\text{O}$  (50 ml) and brine (50 ml) and dried over  $\text{MgSO}_4$ .

Solvent was removed under reduced pressure and the crude product purified by sublimation at 70 °C under dynamic vacuum to yield **1** as a colourless solid (44.5 g, 127.5 mmol, 87.8 %).

$^1\text{H-NMR}$  (200.12 MHz,  $\text{CD}_3\text{CN}$ , 298 K)  $\delta$  = 6.58 (s, 1 H,  $H\text{-N}(\text{C}_6\text{F}_5)_2$ ) ppm.  $^{19}\text{F-NMR}$  (188.31 MHz,  $\text{CD}_3\text{CN}$ , 298 K)  $\delta$  = -155.3 (m, 4 F, *ortho*-F, **1**), -165.9 (m, 4 F, *meta*-F, **1**), -166.5 (m, 2 F, *para*-F, **1**) ppm.

#### S-2.4.2 Synthesis of solvent free $\text{LiNAr}^{\text{F}_2}$ **2**

**1** (20.0 g, 57.3 mmol) was dissolved in *o*DFB (50 ml) and slowly added to a stirred solution of LiHMDS (10.5 g, 63.0 mmol, 1.1 eq.) in *o*DFB (100 ml) at 0°C. After complete addition a colourless precipitate is rapidly formed solidifying the reaction mixture. Additional *o*DFB (30 ml) was added and the reaction mixture stirred for 12 h at ambient temperature and then stored for 1 d at -28°C. The solvent was filtered off and the precipitate washed with *n*-pentane (3 x 30 ml) and dried under reduced pressure to yield **2** as colourless powder (18.48 g, 52.0 mmol, 91 %). Single crystals of the respective difluorobenzene adduct **2**·*o*DFB were grown from concentrated *o*DFB solution (see Figure S 10). NMR of isolated dried **2** in proteo-THF revealed 3% *o*DFB in respect to **2** ensuring complete removal of *o*DFB from the adduct.

$^{19}\text{F-NMR}$  (188.31 MHz, *o*DFB, 298 K)  $\delta$  = -162.3 (d, 4 F, *ortho*-F, **2**), -166.6 (dd, 4 F, *meta*-F, **2**), -173.7 (m, 2 F, *para*-F, **1**) ppm.  $^7\text{Li-NMR}$  (188.31 MHz, *o*DFB, 298 K)  $\delta$  = 1.45 ppm.

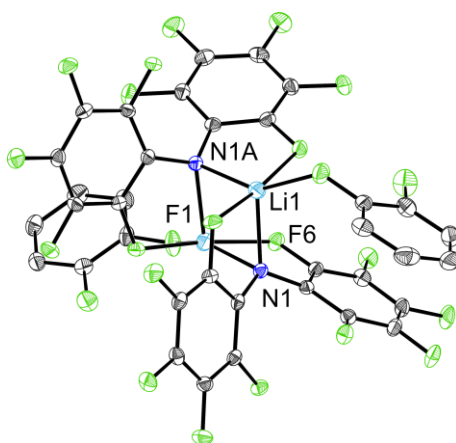

Figure S 10 molecular structure of **2**·*o*DFB. Protons omitted for clarity. Thermal displacement ellipsoids set at 50 % probability.

#### S-2.4.3 Synthesis of perfluoro-5,10-bis(perfluorophenyl)-5,10-dihydrophenazine **3** (phenazine<sup>F</sup>)

**2** (8.0 g, 23 mmol) was placed in a Schlenktube and under slow stirring and dynamic vacuum heated to 180 °C and then 200 °C on a fitted aluminium block. When the set point was reached, the tap to the vacuum manifold was closed. After 1 h hour the reaction proceeded instantaneous forming a white precipitate on the walls of the schlenktube together with a highly viscous black oil in the bottom of the



tube. The combined residue was dissolved in hot MeCN (200 ml) and filtered hot. H<sub>2</sub>O was added to the MeCN solution to precipitate crude **3** (3.9 g, 5.92 mmol, 52.6 %) free of **1** & **2** but contaminated with an unknown impurity by less than 20 % as determined by NMR. Crude **3** was further purified by sublimation under dynamic vacuum at 170 °C to yield **3** as off-white solid (2.83 g, 4.29 mmol, 38 %). Note that impurities in crude **3** form a highly viscous oil during sublimation limiting the liberation of pure **3**. Crystals suitable for X-ray diffraction analysis were grown from concentrated CH<sub>2</sub>Cl<sub>2</sub> solution (see Figure S 11 right).

<sup>19</sup>F-NMR (282.45 MHz, CDCl<sub>3</sub>, 298 K): δ = -141.6 (m, AA'BB'C, 4F, F<sup>5</sup>), -150.4 (m, AA'BB'C, 2F, F<sup>7</sup>), -154.3 (m, AA'BB', 4F, F<sup>1</sup>), -160.3 (m, AA'BB', 4F, F<sup>2</sup>), -161.2 (m, AA'BB'C, 4F, F<sup>6</sup>) ppm. <sup>13</sup>C-NMR (100.62 MHz, CD<sub>2</sub>Cl<sub>2</sub>, 298 K): δ = 147.4 (s, 4C, C<sup>3</sup>), 142.7 (s, 2C, C<sup>5</sup>), 139.0 (s, 4C, C<sup>2</sup>), 138.5 (s, 4C, C<sup>1</sup>), 137.8 (s, 4C, C<sup>4</sup>), 122.1 (s, 4C, C<sup>6</sup>), 117.5 (s, 2C, C<sup>7</sup>) ppm.

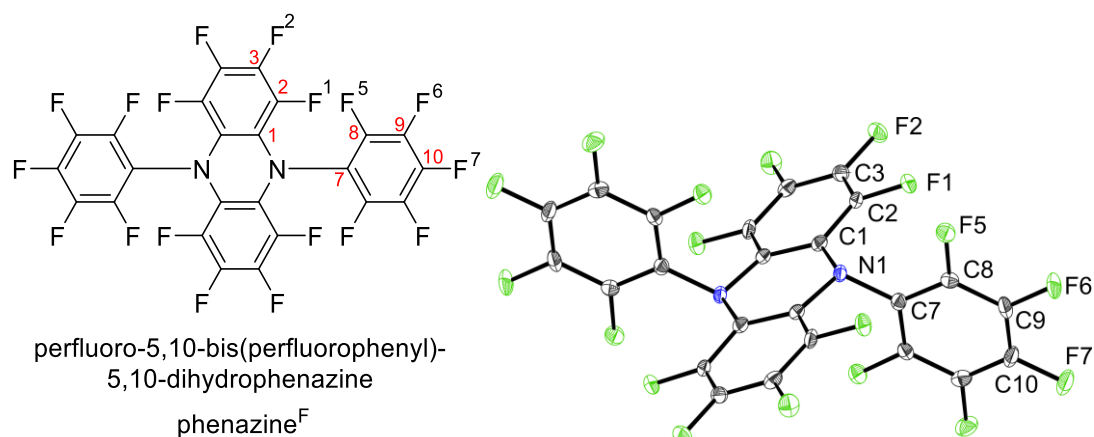

Figure S 11 (left) numbering scheme of fluorine (black) and carbon (red) atoms for NMR analysis. (right) Molecular structure of **3**. Thermal ellipsoids set at 50% probability.

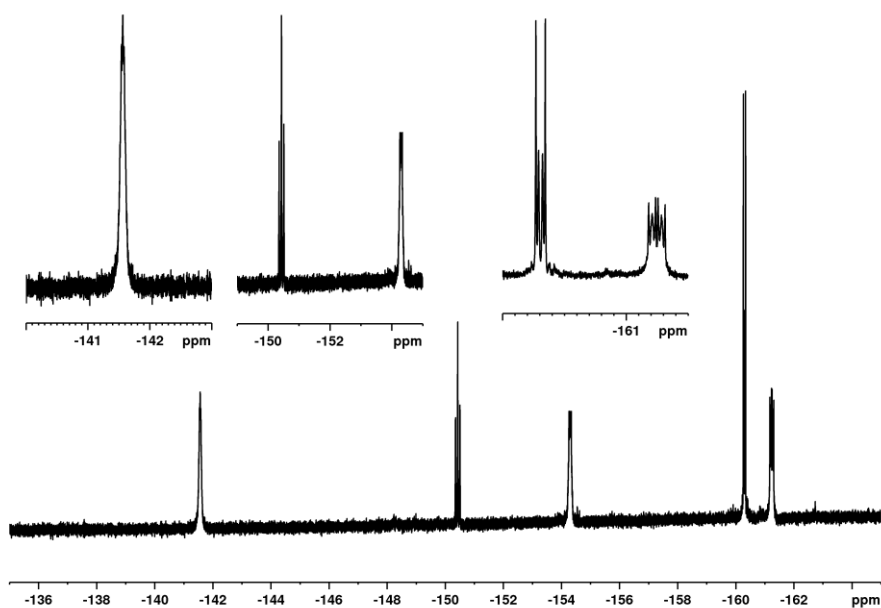

Figure S 12  $^{19}\text{F}$ -NMR (282.45 MHz,  $\text{CDCl}_3$ , 298 K) of **3**.

**Cyclovoltammetric measurements:** For collection of CV measurements a three electrode set up, consisting of a Pt-net working electrode a Pt-wire counterelectrode and a Pt/ $\text{Pt}^+$  quasi-reference electrode was chosen. Blank measurements were collected with a 100 mMol solution of conducting salt  $[\text{NBu}_4][\text{Al}(\text{OR}_F)_4]$  in the respective solvent. After that the analyte **3** was added to a concentration of 10 mMol. For referencing of the obtained oxidation waves,  $\text{FeCp}_2$  was added to the mixture. In the case of *o*DFB the oxidation wave of **3** vanished upon addition of  $\text{FeCp}_2$ . **3** in *o*DFB was therefore by the same method referenced against  $\text{N}(\text{C}_6\text{H}_4\text{Br})_3$  (“magic blue”), which itself was separately referenced against  $\text{FeCp}_2$ . Analysis of the collected fully reversible oxidation waves gave a half-wave potential for **3** of 1.21 V in MeCN and 1.29 V in *o*DFB against  $\text{Fc}^+/\text{Fc}$  (see Figure S 13).

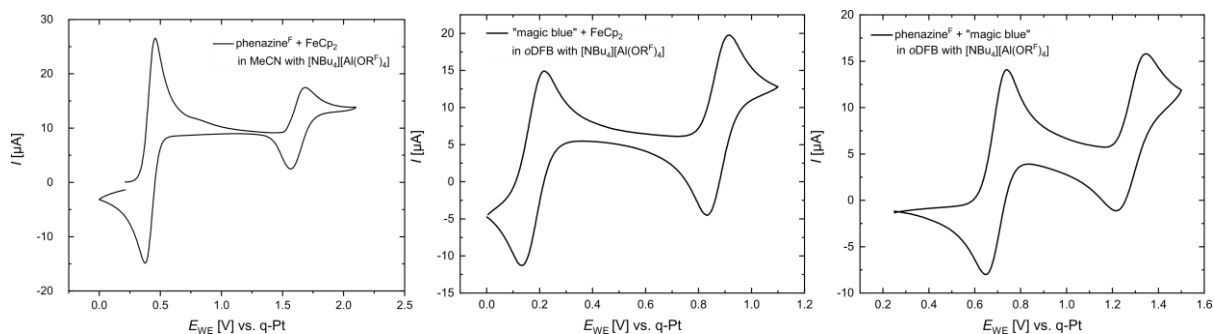

Figure S 13 cyclovoltammetric measurements of (left) **3** and  $\text{FeCp}_2$  in MeCN, (middle) “magic blue” and  $\text{FeCp}_2$  in *o*DFB and (right) **3** and “magic blue” in *o*DFB.

## S-2.5 Synthesis of [phenazine<sup>F</sup>][Al(OR<sup>F</sup>)<sub>4</sub>] **4**

**3** (0.900 g, 1.367 mmol) and Ag[Al(OR<sup>F</sup>)<sub>4</sub>] (1.47 g, 1.367 mmol, 1 eq.) were placed in one arm of an H-cell equipped with a G4 frit. Br<sub>2</sub> (0.3 ml, 5.9 mmol, 4.3 eq.) was dissolved in SO<sub>2</sub> (5 ml) and the mixture condensed into the empty arm of the H-cell. The Br<sub>2</sub>/SO<sub>2</sub> solution was then poured onto the reaction mixture through the frit, which resulted in immediate colour change to deep purple. The reaction mixture was stirred for 12 h at ambient temperature. The Br<sub>2</sub>/SO<sub>2</sub> solution was condensed into the empty arm of the H-cell to allow for complete precipitation of AgBr and poured back onto the reaction mixture. The deep purple solution was then filtered via the internal frit and extracted three times by back condensing the SO<sub>2</sub> until no purple tint of the solution was visible. The Br<sub>2</sub>/SO<sub>2</sub> solution was removed under reduced pressure and the precipitate dried under vacuum. **4** was obtained as deep purple to black solid (2.15 g, 1.32 mmol, 96.7 %). Crystals suitable for X-ray diffraction analysis were grown by layering of solutions of **4** in CH<sub>2</sub>Cl<sub>2</sub> or *o*DFB with *n*-pentane.

ESI-MS positive ion mode:  $m/z = 491.08$  [N<sub>2</sub>C<sub>18</sub>F<sub>13</sub>]<sup>+</sup> (4%), 658.08 [N<sub>2</sub>C<sub>24</sub>F<sub>18</sub>]<sup>+</sup> (**4**). negative ion mode:  $m/z = 967.00$  [AlO<sub>4</sub>C<sub>16</sub>F<sub>36</sub>]<sup>-</sup>.

Crystals obtained from *o*DFB solution show a superstructure, which could be collected at 80 K the asymmetric unit of which is shown in Figure S 14. The obtained structure shows a very large cell ( $a = 22.30$ ,  $b = 58.21$ ,  $c = 26.45$ ) containing 24 formula units and stops refinement at  $wR_2 = 0.27$ , with residual electron density, which could not be modelled with additional disorder. However, the structure of the radical cation [phenazine<sup>F</sup>]<sup>+</sup> is identical to the structure collected from crystals grown from CH<sub>2</sub>Cl<sub>2</sub> solution. Because of the poor quality of the obtained structure (numerous unresolvable A/B/C alerts in checkcif) the data was not uploaded to the CCDC.

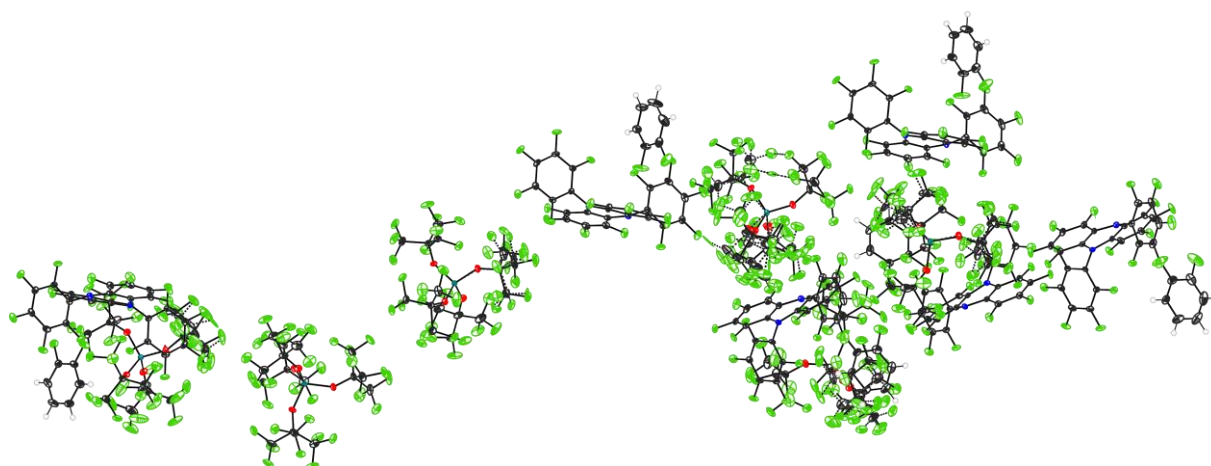

Figure S 14. Asymmetric unit of crystals of **4** grown from *o*DFB solution.

The structure of **4** obtained from CH<sub>2</sub>Cl<sub>2</sub> solution contains two crystallographically inequivalent moieties of **4** in the asymmetric unit, where the C<sub>6</sub>F<sub>4</sub> residues of the dihydrophenazine backbone are slightly U-bent to 17.2 resp. 14.2° whereas the C<sub>6</sub>F<sub>5</sub>-groups show a tilt of 10.6 resp. 17.1° against each

other. Furthermore the C<sub>6</sub>F<sub>5</sub> moieties are bend downwards to allow for two relatively short N,F distances to the *ortho*-fluorine substituents. The central nitrogen atoms are almost perfectly planar coordinated with an angle sum of 358.2° compared to more pyramidal neutral **3** with an angle sum of 342.2° and show two identical N–C bond lengths to the dihydrophenazine backbone (avg.  $d_{N-C} = 1.393(4)$  Å); which are by 0.05 Å significantly shorter than the N–C bonds to the *ipso*-carbon on the C<sub>6</sub>F<sub>5</sub> residue (avg.  $d_{N-C} = 1.444(4)$  Å). Similar but slightly longer bond distances are found in neutral **3** ( $d_{N-C \text{ backbone}} = 1.422(3)$  Å,  $d_{N-C \text{ ipso-C}_6\text{F}_5} = 1.447(3)$  Å).

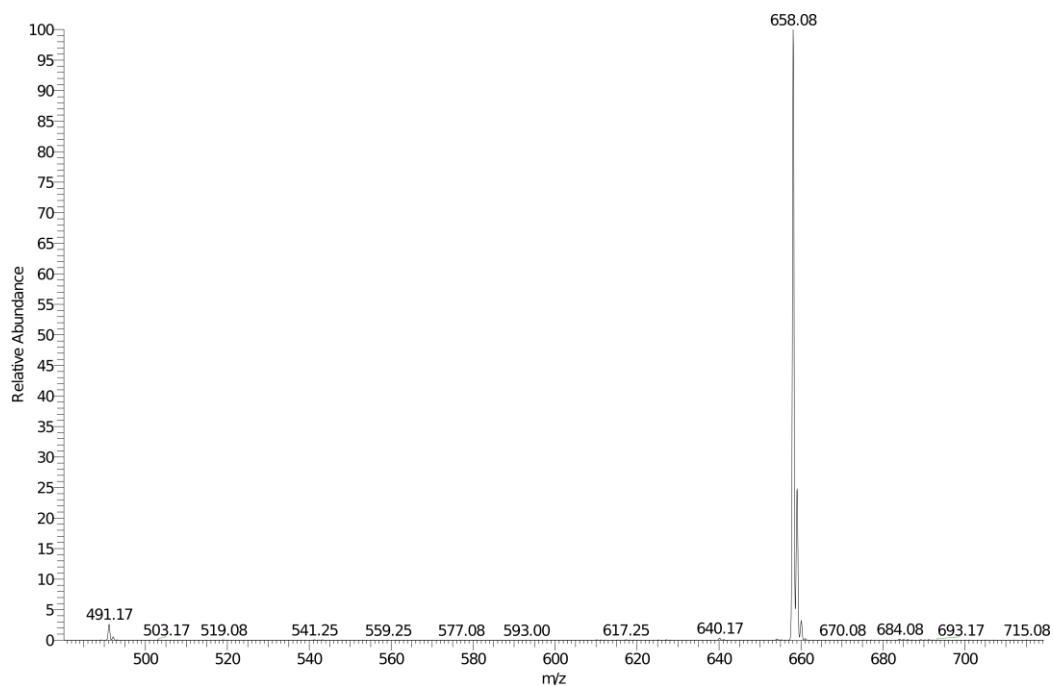

Figure S 15 positive ion mode ESI-MS spectrum of **4**.

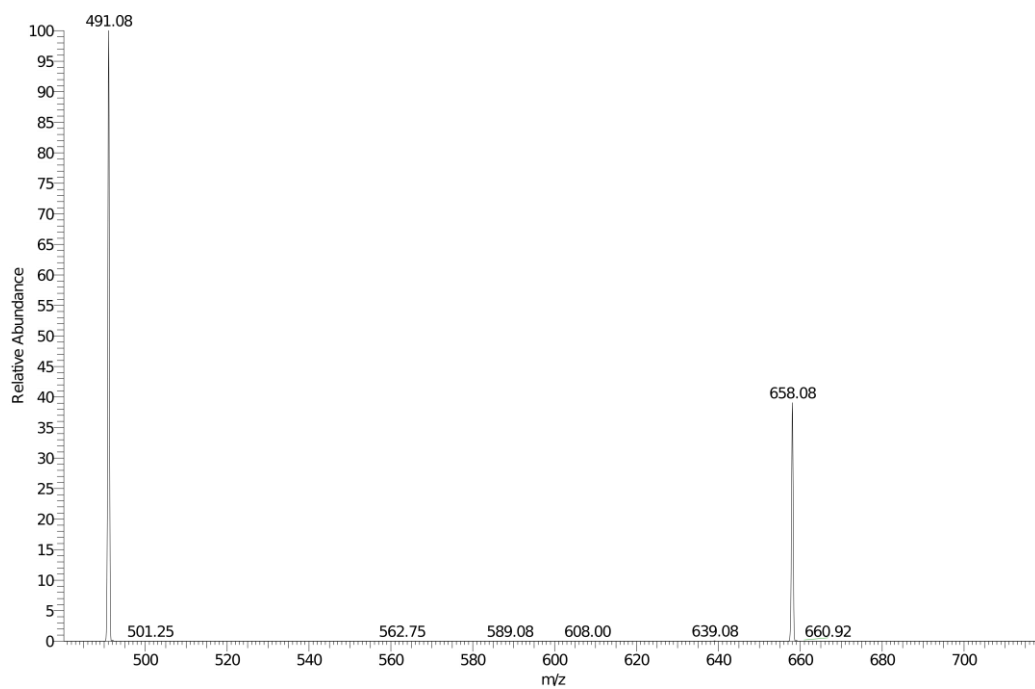

Figure S 16 positive ion mode ESI-MS spectrum of **4** with CID on mass envelope at 658.08 m/z at with normalized collision energy of 40.

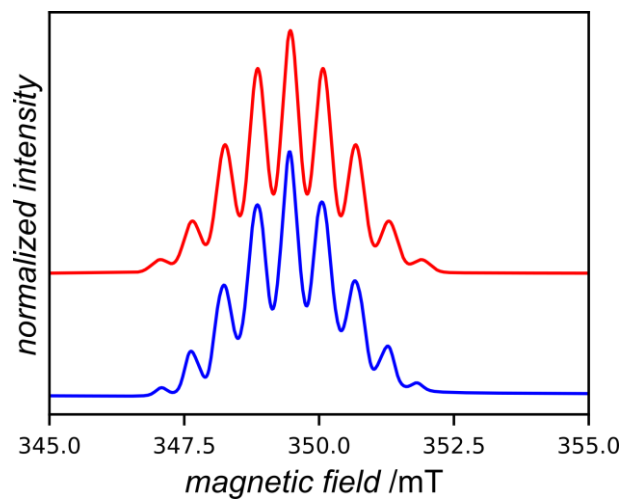

Figure S 17 (blue trace) integrated field modulated liquid state cw-EPR of **4** in SO<sub>2</sub> at ambient temperature with corresponding fit (red trace).

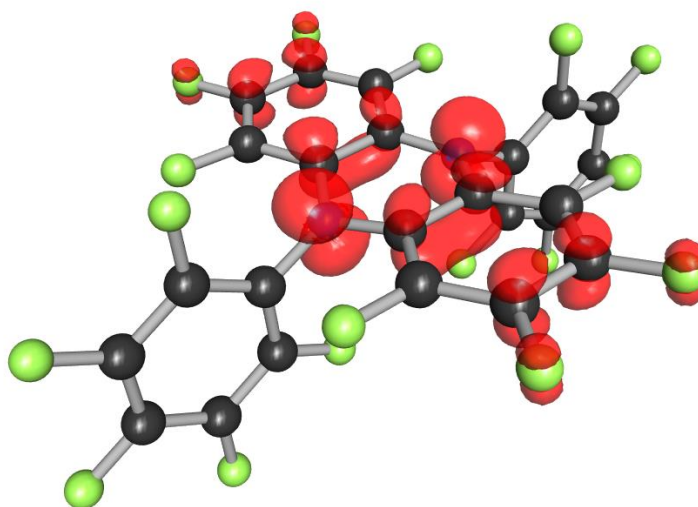

Figure S 18 spin density plot of  $[\text{phenazineF}]^+ \mathbf{4}^+$ . The spin density shows delocalisation of unpaired electron over the dihydrophenazine backbone with biggest occupancy on central pyrazine subunit as well as positions para in respect to the nitrogen atoms.

## S-2.6 Reaction between **4** and different substrates

### S-2.6.1 Reaction between **4** and Sn in MeCN. Synthesis of $[\text{Sn}(\text{MeCN})_5][\text{Al}(\text{OR}^F)_2] \mathbf{5}$ .

**4** (90.0 mg, 0.0553 mmol) and Sn (52.0 mg, 0.443 mmol, 8 eq. were weighed in a Schlenk tube. MeCN (4 ml) was added and the reaction mixture stirred for 2 h at ambient temperature, during which a colour change from dark purple to faint yellow was observed. The solvent was removed under reduced pressure and the residue dissolved in *o*DFB (0.8 ml) and filtered into an NMR tube equipped with J.Young Teflon valve. After completed NMR measurement the solution was layered with *n*-pentane to yield crystals of **5** suitable for X-ray diffraction analysis (see Figure S 19).

NMR analysis revealed intact anion in 1 : 1 ration to neutral **3** underlining purity of employed **4**. Furthermore ratio between the anion and MeCN is 2 : 6 by referencing to *o*DFB as internal standard.  $^{119}\text{Sn}$ -NMR revealed no tin resonances probably due to low sample concentration.

$^1\text{H}$ -NMR (400.17 MHz, *o*DFB, 298 K)  $\delta = 2.04$  (s, 3 H,  $\text{NCCH}_3$ ) ppm.  $^{19}\text{F}$ -NMR (376.54 MHz, *o*DFB, 298 K)  $\delta = -74.9$  (s, 9 F,  $\text{OC}(\text{CF}_3)_3$ ),  $-75.4$  (s, 36 F,  $[\text{Al}(\text{OC}(\text{CF}_3)_3)_4]^-$ ),  $-142.4$  (m, AA'BB'C, 4F,  $\text{F}^5$ , **3**),  $-152.4$  (m, AA'BB'C, 2F,  $\text{F}^7$ , **3**),  $-156.0$  (m, AA'BB', 4F,  $\text{F}^1$ , **3**),  $-162.3$  (m, AA'BB', 4F,  $\text{F}^2$ , **3**),  $-163.3$  (m, AA'BB'C, 4F,  $\text{F}^6$ , **3**).  $^{27}\text{Al}$ -NMR (104.27 MHz, *o*DFB, 298 K)  $\delta = 36.4$  (s,  $[\text{Al}(\text{OC}(\text{CF}_3)_3)_4]^-$ ) ppm.

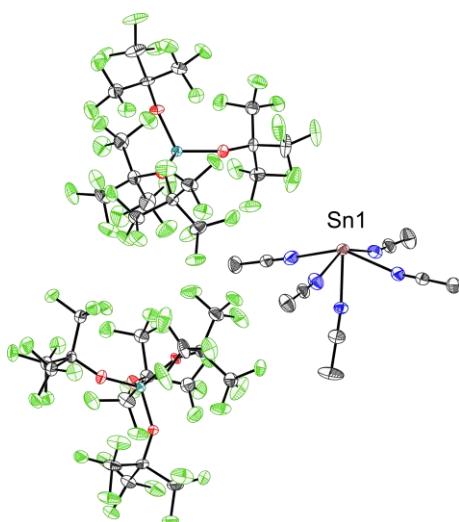

Figure S 19 molecular structure of  $[Sn(MeCN)_5][Al(OR^F)_4]_2$  **5**

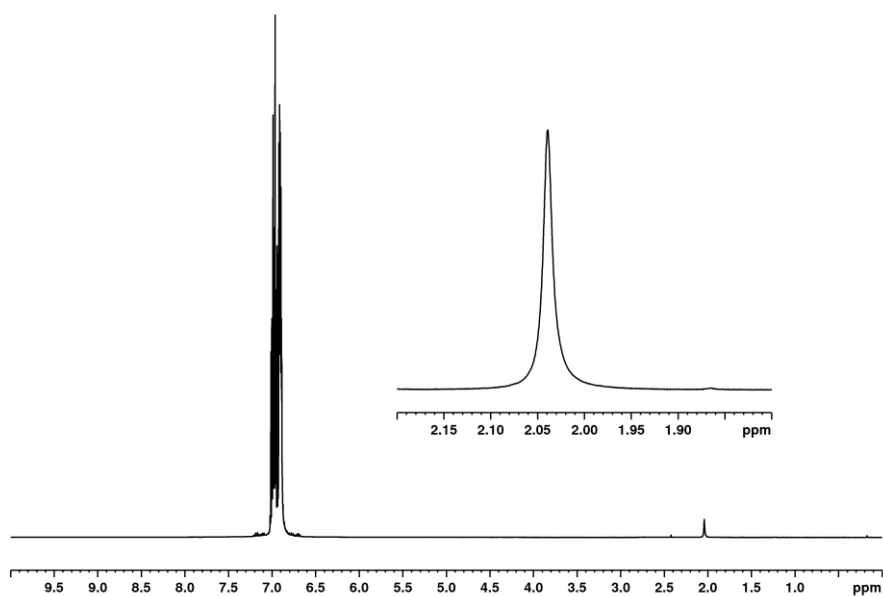

Figure S 20:  $^1H$ -NMR (400.17 MHz, oDFB, 298 K) of dried reaction mixture between **4** and Sn in MeCN.

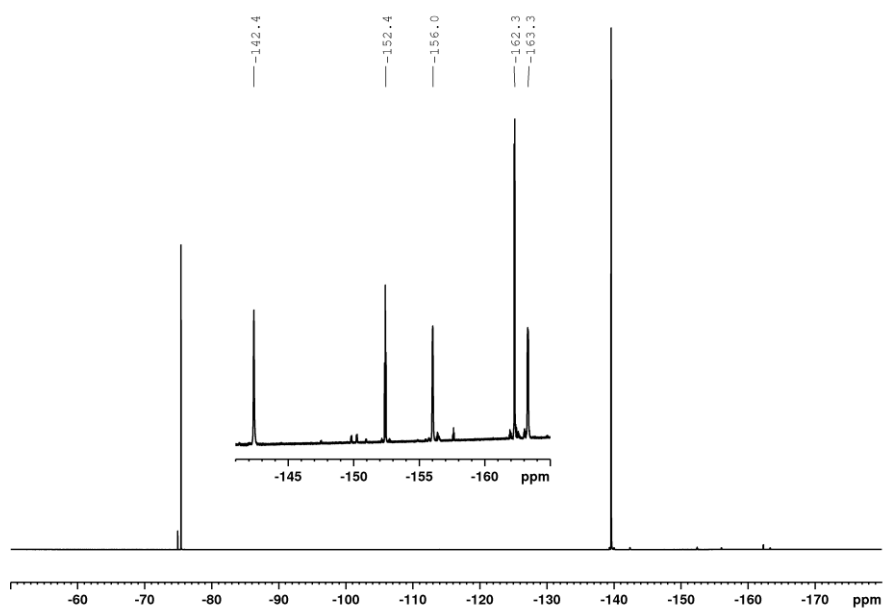

Figure S 21:  $^{19}\text{F}$ -NMR (376.54 MHz, *o*DFB, 298 K) of dried reaction mixture between **4** and Sn in MeCN.

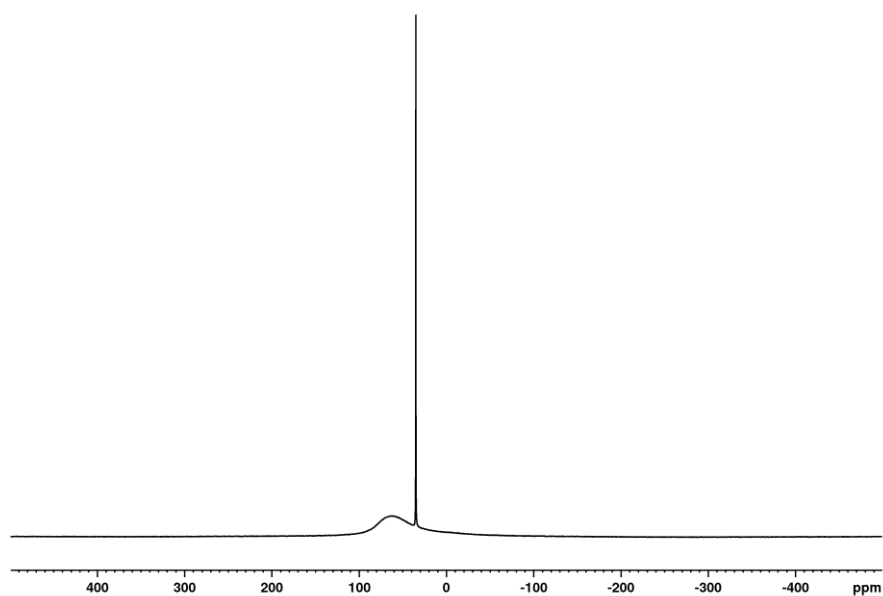

Figure S 22:  $^{27}\text{Al}$ -NMR (104.27 MHz, *o*DFB, 298 K) of dried reaction mixture between **4** and Sn in MeCN.

S-2.6.2 Reaction between **4** and Sn in presence of trispyrazolymethane ( $\text{CHpz}_3$ ). Synthesis of  $[\text{Sn}(\text{CHpz}_3)_2][\text{Al}(\text{OR}^{\text{F}})_4]_2$  **6**.

**4** (150 mg, 0.0923 mmol) and  $\text{CHpz}_3$  (22 mg, 0.10 mmol, 1.1 eq.) were dissolved in *o*DFB (3 ml). Sn grains (110 mg, 0.923 mmol, 10 eq.) were added in a positive stream of argon and the reaction mixture



stirred for 12 h at ambient temperature. The faint yellow reaction mixture was filtered and layered with n-pentane. **6** was obtained as colourless crystals (110 mg, 0.046 mmol, 88 % crystalline yield).

NMR analysis revealed intact anion in 2 : 2 ratio to the employed  $\text{CHpz}_3$ .  $^{119}\text{Sn}$ -NMR revealed no tin resonances probably due to low sample concentration.

$^1\text{H}$ -NMR (300.18 MHz, *o*DFB, 298 K)  $\delta$  = 8.73 (s, 1 H,  $\text{HC}(\text{pz})_3$ ), 8.24 (m, 3 H, pz  $\text{H}^1$ ), 7.71 (m, 3 H, pz  $\text{H}^3$ ), 6.54 (m, 3 H, pz  $\text{H}^2$ ) ppm.  $^{13}\text{C}$ -NMR (75.48 MHz, *o*DFB, 298 K)  $\delta$  = 143.8 (s, pz  $\text{C}^1$ ), 133.1 (s, pz  $\text{C}^3$ ), 108.7 (s, pz  $\text{C}^2$ ), 78.7 (s,  $\text{HCpz}_3$ ) ppm.  $^{19}\text{F}$ -NMR (376.54 MHz, *o*DFB, 298 K)  $\delta$  = -75.3 (s, 36 F,  $[\text{Al}(\text{OC}(\text{CF}_3)_3)_4]^-$ ) ppm.  $^{27}\text{Al}$ -NMR (104.27 MHz, *o*DFB, 298 K)  $\delta$  = 35.0 (s,  $[\text{Al}(\text{OC}(\text{CF}_3)_3)_4]^-$ ) ppm. ATR-FTIR:  $\nu$  = 3163 (vww) 3146 (vww) 1525 (vww) 1511 (vww) 1438 (vww) 1407 (vww) 1351 (vw) 1297 (mw) 1273 (ms) 1240 (vvs) 1212 (vvs) 1169 (m) 1098 (vw) 1063 (vw) 969 (vvs) 850 (vw) 831 (vw) 792 (m) 765 (m) 755 (mw) 726 (vvs).

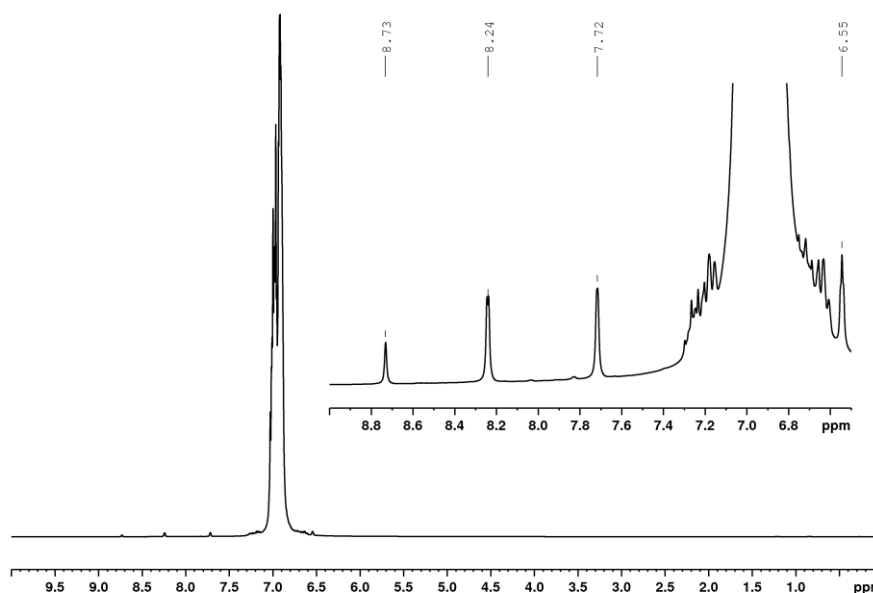

Figure S 23  $^1\text{H}$ -NMR (300.18 MHz, *o*DFB, 298 K) of isolated crystalline **6**.

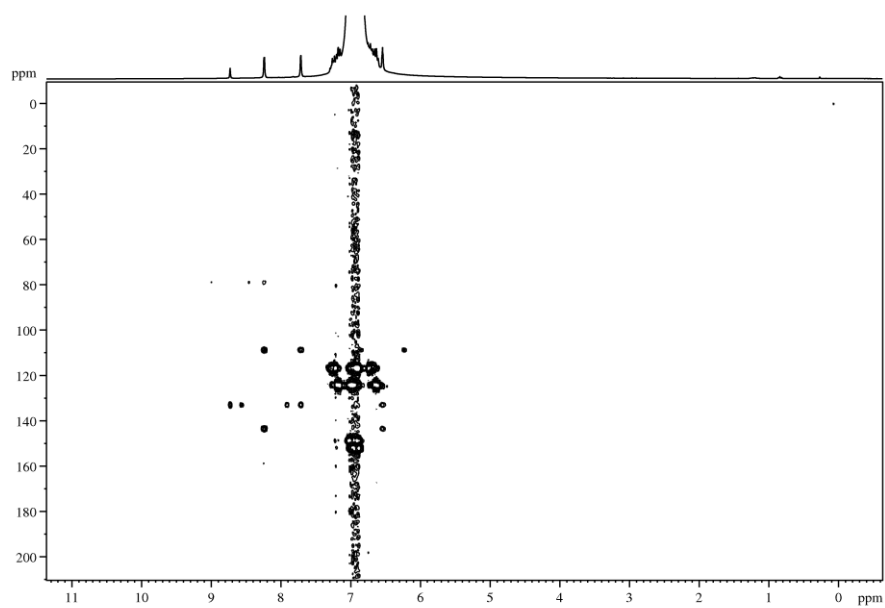

Figure S 24  $^1\text{H}$ - $^{13}\text{C}$ -HMBC NMR (75.48 MHz, oDFB, 298 K) of isolated crystalline **6**.

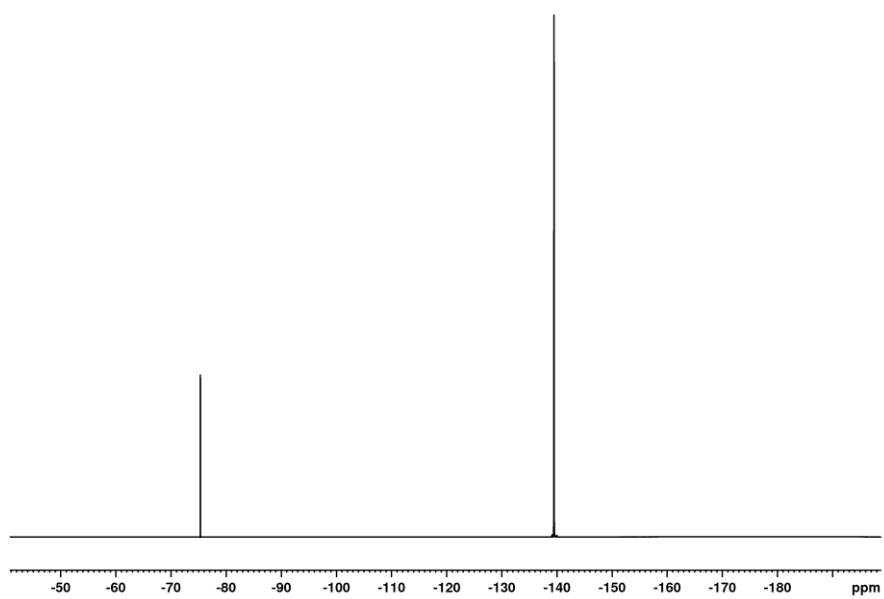

Figure S 25  $^{19}\text{F}$ -NMR (376.54 MHz, oDFB, 298 K) of isolated crystalline **6**.

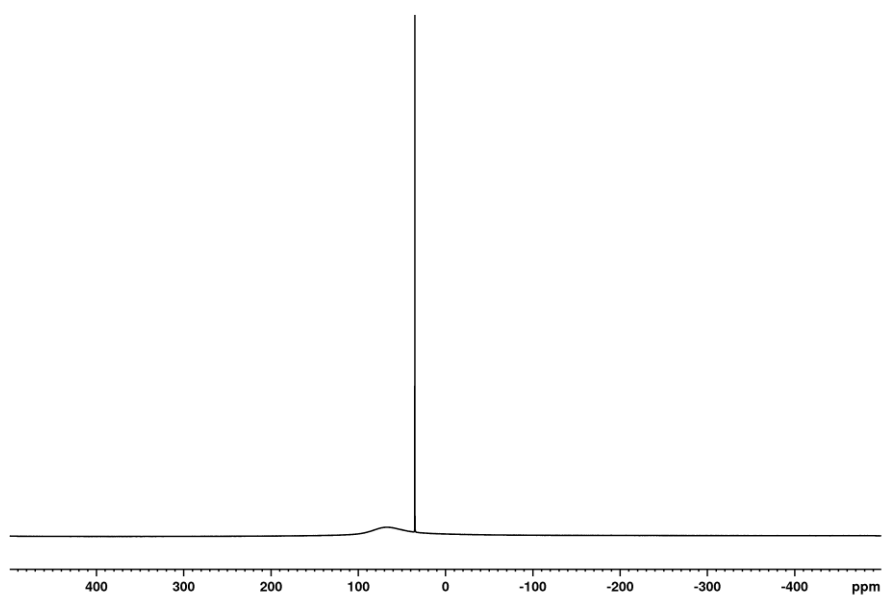

Figure S 26  $^{27}\text{Al}$ -NMR (104.27 MHz, oDFB, 298 K) of isolated crystalline **6**.

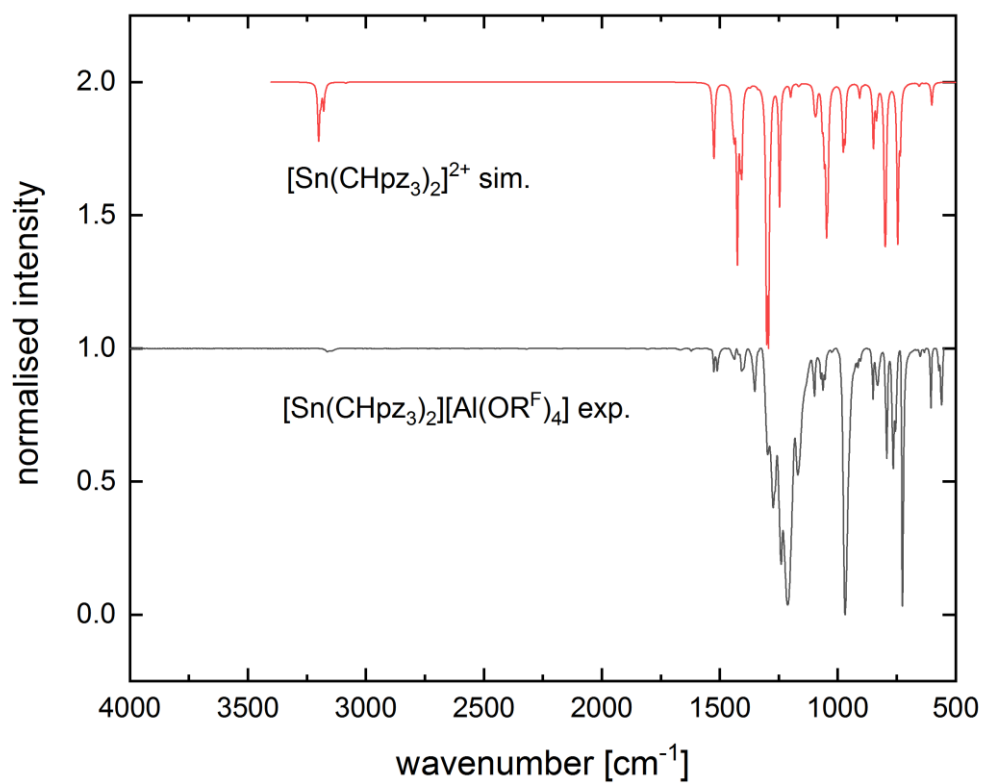

Figure S 27 (black) ATR-FTIR spectrum of **6** together with simulated IR spectrum.

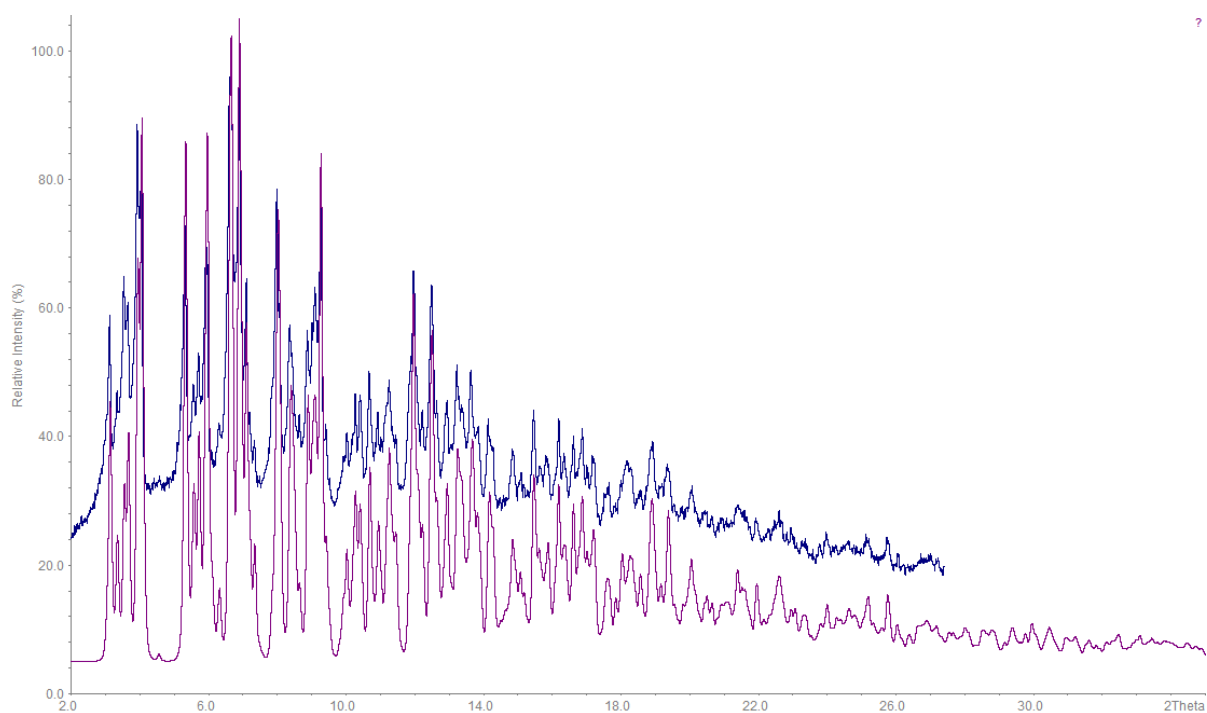

Figure S 28 (blue trace) pwd-XRD analysis of bulk material of **6**. (purple trace) simulated powder diffraction pattern from obtained crystalline **6**.

### S-2.6.3 Reaction between **4** and $[\text{FeCp}^*_2][\text{Al}(\text{OR}^F)_4]$ in *o*DFB under 3 atm of CO. Synthesis of $[\text{Fe}(\text{CO})\text{Cp}^*_2][\text{Al}(\text{OR}^F)_4]_2$ **7**.

**4** (150 mg, 0.0923 mmol) and  $[\text{FeCp}^*_2][\text{Al}(\text{OR}^F)_4]$  (119 mg, 0.0923 mmol, 1 eq.) were weighed into an H-cell equipped with a G4 frit and dissolved in *o*DFB (5 ml). The solution was degassed by three freeze pump thaw cycles. CO (3 bar) was added onto the H-cell and the reaction mixture stirred for 2 h at ambient temperature. The vessel was vented via the argon manifold and *n*-pentane (15 ml) was added to the empty arm of the H-cell and 1 atmosphere of CO was added onto the H-cell. Dark red crystals of **7** were grown by vapour diffusion (132 mg, 0.0577 mmol, 62.5 % crystalline yield).

$^1\text{H-NMR}$  (200.13 MHz, *o*DFB, 298 K)  $\delta$  = 2.24 (s, 15 H,  $[\text{C}_5(\text{CH}_3)_5]^-$ ) ppm.  $^{13}\text{C-NMR}$  (50.32 MHz, *o*DFB, 298 K)  $\delta$  = 215.5 (s, CO), 111.6 (s,  $[\text{C}_5(\text{CH}_3)_5]^-$ ), 8.2 (s,  $[\text{C}_5(\text{CH}_3)_5]^-$ ) ppm.  $^{19}\text{F-NMR}$  (188.31 MHz, *o*DFB, 298 K)  $\delta$  = -75.4 (s, 36 F,  $[\text{Al}(\text{OC}(\text{CF}_3)_3)_4]^-$ ) ppm. ATR-FTIR:  $\nu$  = 2930 (vww) 2057 (w) 1507 (vww) 1458 (vww) 1390 (vww) 1352 (vw) 1297 (mw) 1274 (ms) 1266 (ms) 1241 (vvs) 1209 (vvs) 1177 (ms) 1077 (vww) 969 (vvs) 832 (w) 756 (vww) 727 (vvs) 617 (vww) 560 (vw).

NMR analysis revealed intact anion in 2 : 2 ratio to Cp\* by referencing with *o*DFB as internal standard, underlining purity of the collected sample. This is in line with the single vibrational band of bound CO at  $2057\text{ cm}^{-1}$  observed.

Crystals grown by vapour diffusion show super structured data, which was refineable by employing huge amounts of disorder in both cationic and anionic part. The collected crystal shows pseudo trigonal geometry with best solution in trigonal space group  $R\bar{3}$  (No. 148). The rather poorly described model of the molecular structure of **7** is shown in Figure S 29. The asymmetric unit contains 1 1/6 formula units in the cationic part and 2 1/3 formula units in the anionic part giving an overall charge of the cation of +2. The first cationic moiety was described by disorder of each of the two Cp\* fragments over two positions while the single CO molecule is disordered over three positions. The second cationic moiety lies on a special position with 6-fold symmetry. Here the Cp\* moiety was disordered over two positions while CO is duplicated by symmetry over six positions to give occupancy of 1/6. Refinement was stopped at  $wR_2 = 0.23$ , with much residual electron density in the anionic part, while the highest q-peaks are located around Fe probably due to absorption. The obtained molecular structure was used for simulation of powder diffraction patterns for phase purity analysis. Bond metric data is not discussed because of the poor quality of the obtained data set/model and structure was not uploaded to CCDC (numerous unresolvable A/B/C alerts in checkcif). The authors want to make clear the obtained structure is by no means good. While the structure does support the presence of **7** the other analytical data collected from the same sample strongly confirms presence and purity of **7**. Recrystallisation of bulk material by layering of concentrated oDFB solution with n-pentane gave block shaped crystals which again showed underlying superstructure. However the obtained data set was satisfyingly refineable.

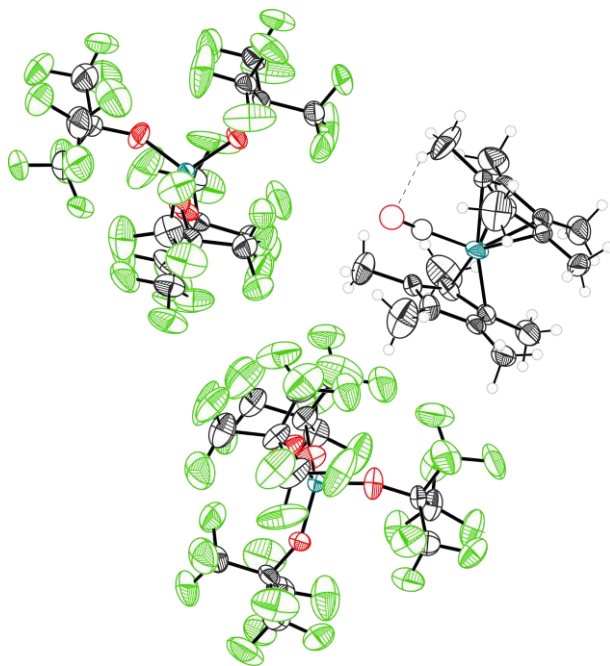

Figure S 29: Molecular structure of **7**. Thermal displacement ellipsoids set 50% probability. Only majority part of disordered components shown for clarity.

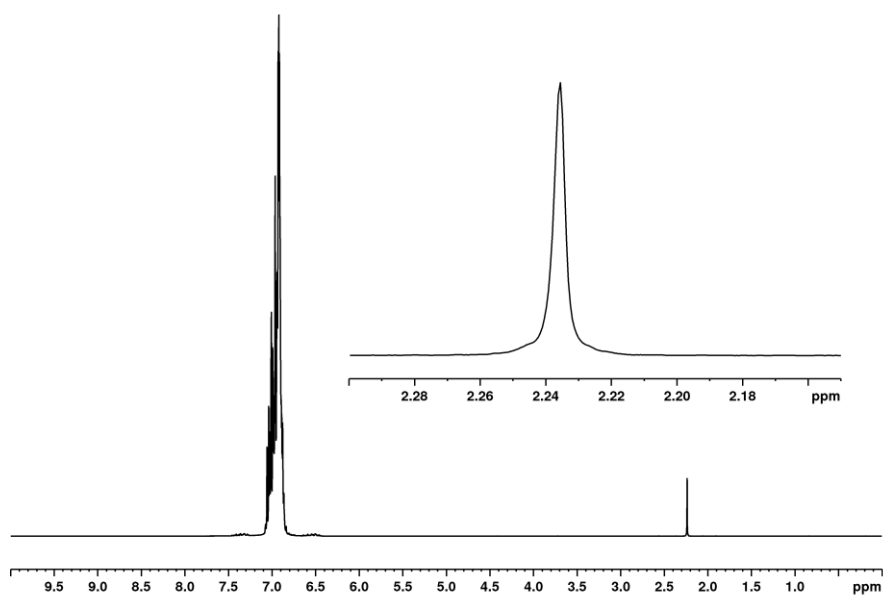

Figure S 30  $^1\text{H-NMR}$  (200.13 MHz, oDFB, 298 K) of isolated crystalline **7**.

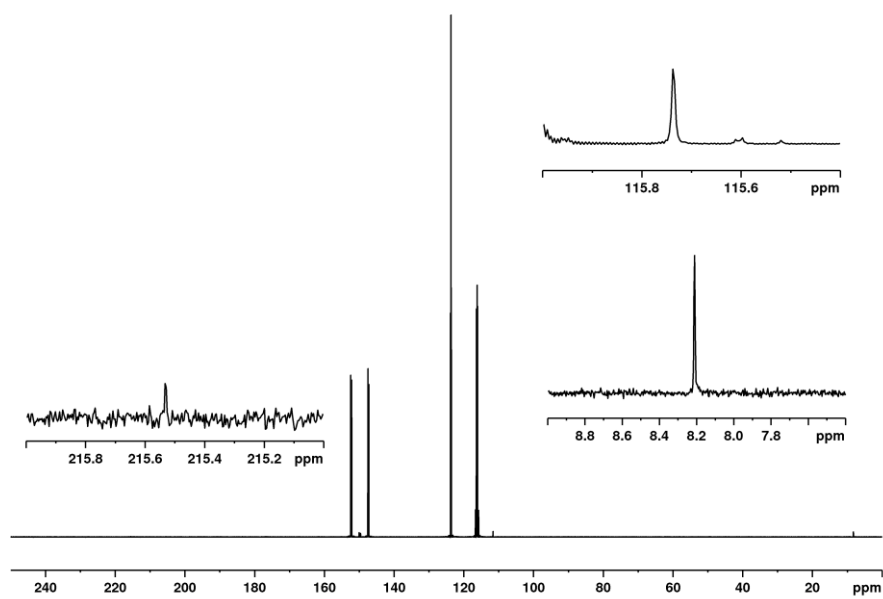

Figure S 31  $^{13}\text{C-NMR}$  (50.32 MHz, oDFB, 298 K) of isolated crystalline **7**.

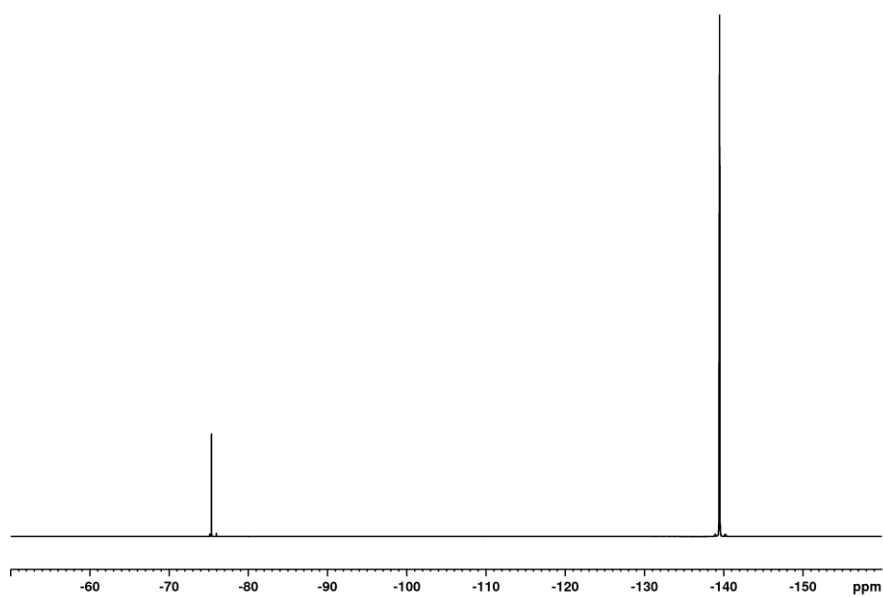

Figure S 32  $^{19}\text{F}$ -NMR (188.31 MHz, oDFB, 298 K) of isolated crystalline **7**.

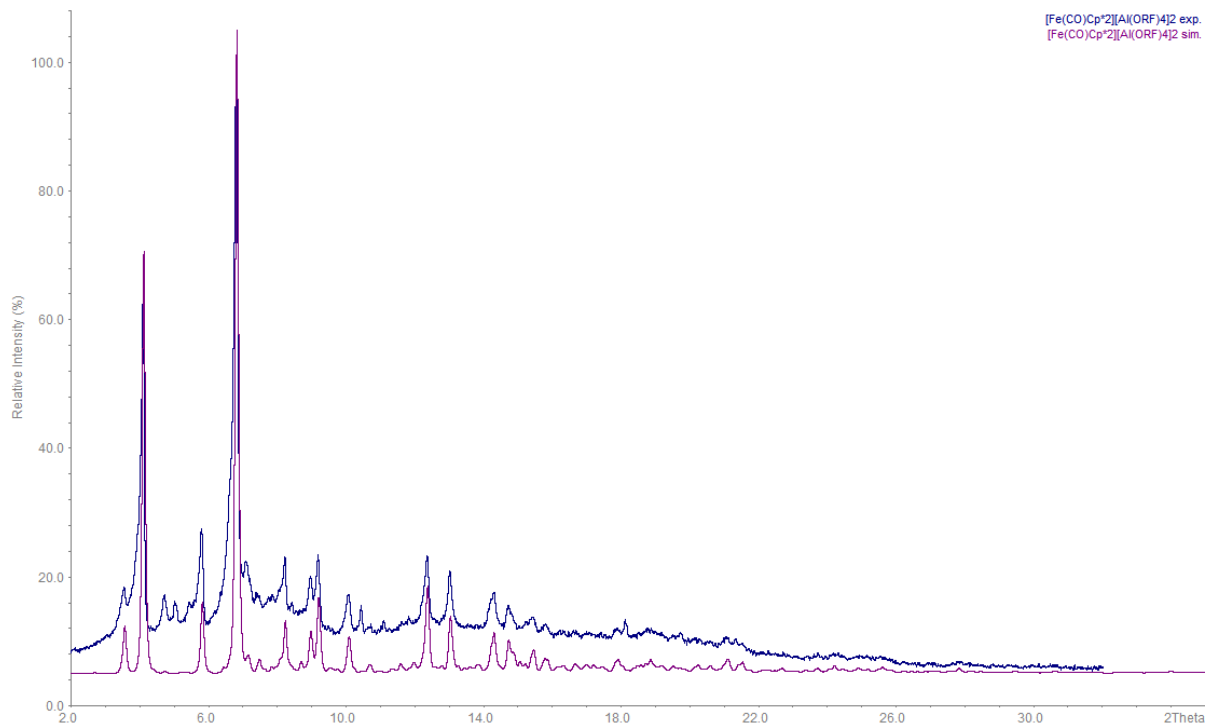

Figure S 33 (blue trace) *pwd*-XRD analysis of bulk material of **7**. (purple trace) simulated powder diffraction pattern from obtained crystalline **7**.

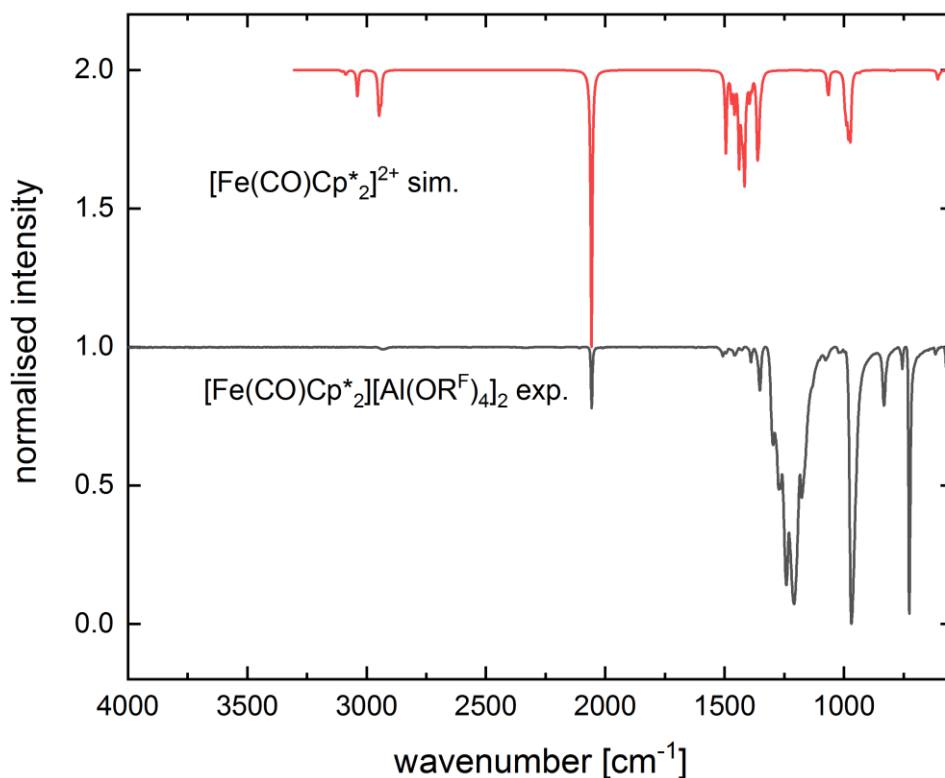

Figure S 34 (black) ATR-FTIR spectrum of **7** together with simulated IR spectrum of the dication only.

S-2.6.4 Reaction between **4** and  $[\text{FeCp}^*_2][\text{Al}(\text{OR}^F)_4]$  in *o*DFB in presence of excess <sup>t</sup>Bu-NC.

Synthesis of  $[\text{Fe}(\text{CN-}^t\text{Bu})\text{Cp}^*_2]^{2+}$  **8**.

**4** (200 mg, 0.123 mmol) and  $[\text{FeCp}^*_2][\text{Al}(\text{OR}^F)_4]$  (0.152 mg, 0.117 mmol, 0.95 eq.) were dissolved in *o*DFB (4 ml). Under stirring at ambient temperature a solution of <sup>t</sup>Bu-NC in *o*DFB (1Mol, 0.3 ml, 0.3 mmol) was added to the reaction mixture. After 1 h at ambient temperature the deep purple colour of **4** vanished to give a dark brown solution. The reaction mixture was layered with *n*-pentane to yield **8** as dark red crystals (210 mg, 0.089 mmol, 76.6 % crystalline yield).

<sup>1</sup>H-NMR (400.17 MHz, *o*DFB, 298 K)  $\delta$  = 1.99 (shoulder, 9 H, CN-(CH<sub>3</sub>)<sub>3</sub>), 1.98 (s, 30 H, 2 x {C<sub>5</sub>(CH<sub>3</sub>)<sub>5</sub>}) ppm. <sup>13</sup>C-NMR (50.32 MHz, *o*DFB, 298 K)  $\delta$  = 108.4 (s, [C<sub>5</sub>(CH<sub>3</sub>)<sub>5</sub>]<sup>-</sup>), 65.1 (s, CN-(CH<sub>3</sub>)<sub>3</sub>), 29.6 (s, CN-(CH<sub>3</sub>)<sub>3</sub>) 9.1 (s, [C<sub>5</sub>(CH<sub>3</sub>)<sub>5</sub>]<sup>-</sup>) ppm. <sup>14</sup>N-NMR (28.908 MHz, *o*DFB, 298 K)  $\delta$  = 177.4 (s, CN-(CH<sub>3</sub>)<sub>3</sub>) ppm. <sup>19</sup>F-NMR (376.54 MHz, *o*DFB, 298 K)  $\delta$  = -75.4 (s, 36 F, [Al(OC(CF<sub>3</sub>)<sub>3</sub>)<sub>4</sub>]<sup>-</sup>) ppm. <sup>27</sup>Al-NMR (104.27 MHz, *o*DFB, 298 K)  $\delta$  = 35.4 (s, [Al(OC(CF<sub>3</sub>)<sub>3</sub>)<sub>4</sub>]<sup>-</sup>) ppm. ATR-FTIR:  $\nu$  = 2198 (vww) 2176 (vww) 2129 (vww) 1509 (vww) 1458 (vww) 1390 (vww) 1352 (vw) 1297 (mw) 1274 (ms) 1239 (vvs) 1213 (vvs) 1172 (ms) 1102 (vww) 1078 (vww) 970 (vvs) 831 (vw) 750 (vw) 726 (vvs) 612 (vww) 560 (vw).



NMR analysis revealed intact anion in 2.23 : 2 ratio to  $\{(\text{NC}^t\text{Bu})\text{Cp}^*_2\}$  by referencing to oDFB. This is probably due to < 20 % contamination by paramagnetic starting material  $[\text{FeCp}^*_2][\text{Al}(\text{OR}^f)_4]$ .  $(\text{NC}^t\text{Bu})$  is not stable towards **4** and forms a plethora of degradation products over time. This also explains the two additional small bands around  $2170\text{ cm}^{-1}$  in collected IR spectra.

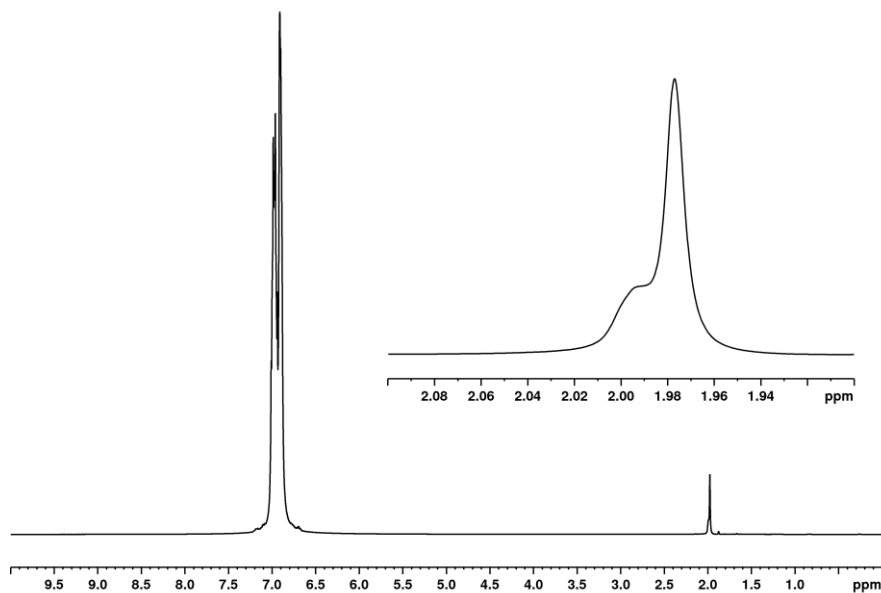

Figure S 35  $^1\text{H}$ -NMR (400.17 MHz, oDFB, 298 K) of isolated crystalline **8**.

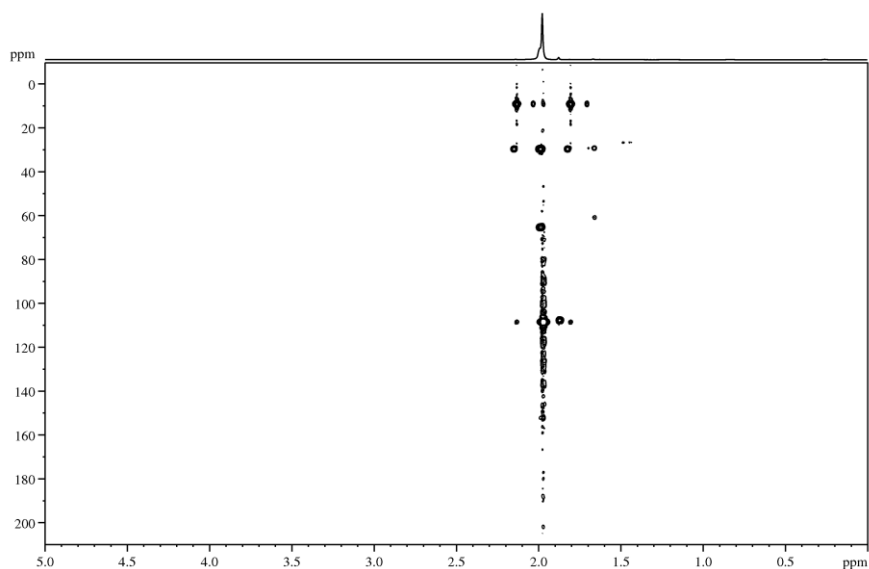

Figure S 36  $^1\text{H}$ - $^{13}\text{C}$ -HMBC NMR (400.17 MHz, oDFB, 298 K) of isolated crystalline **8**.

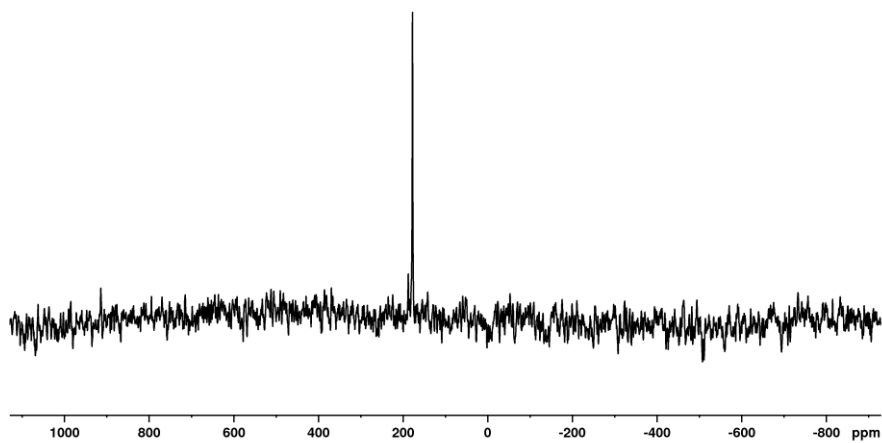

Figure S 37  $^{14}\text{N}$ -NMR (28.908 MHz, oDFB, 298 K) of isolated crystalline **8**.

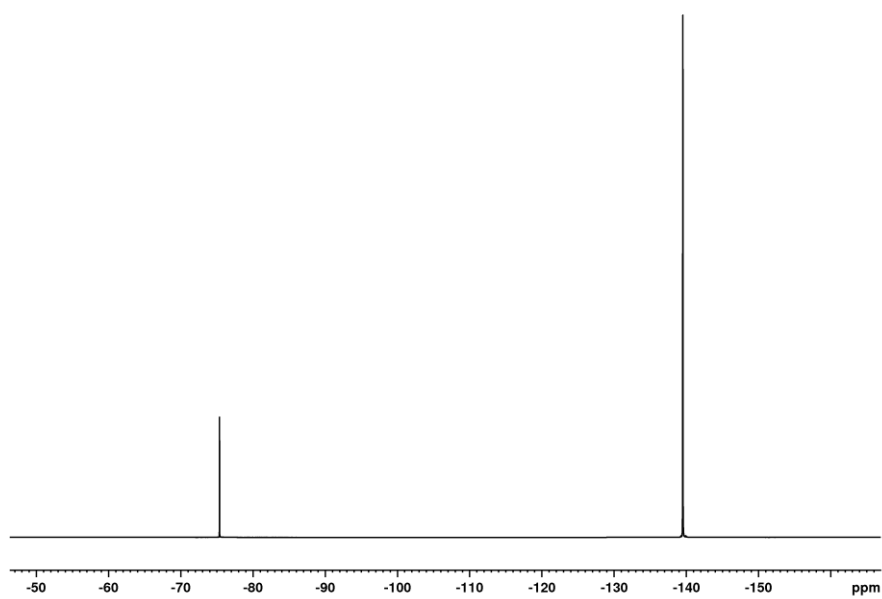

Figure S 38  $^{19}\text{F}$ -NMR (376.54 MHz, oDFB, 298 K) of isolated crystalline **8**.

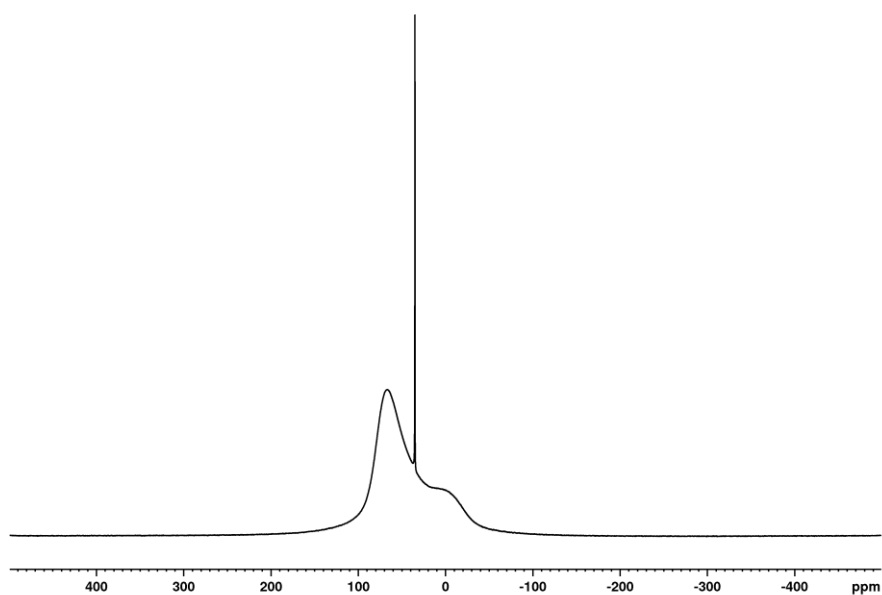

Figure S 39  $^{27}\text{Al}$ -NMR (104.27 MHz, oDFB, 298 K) of isolated crystalline **8**.

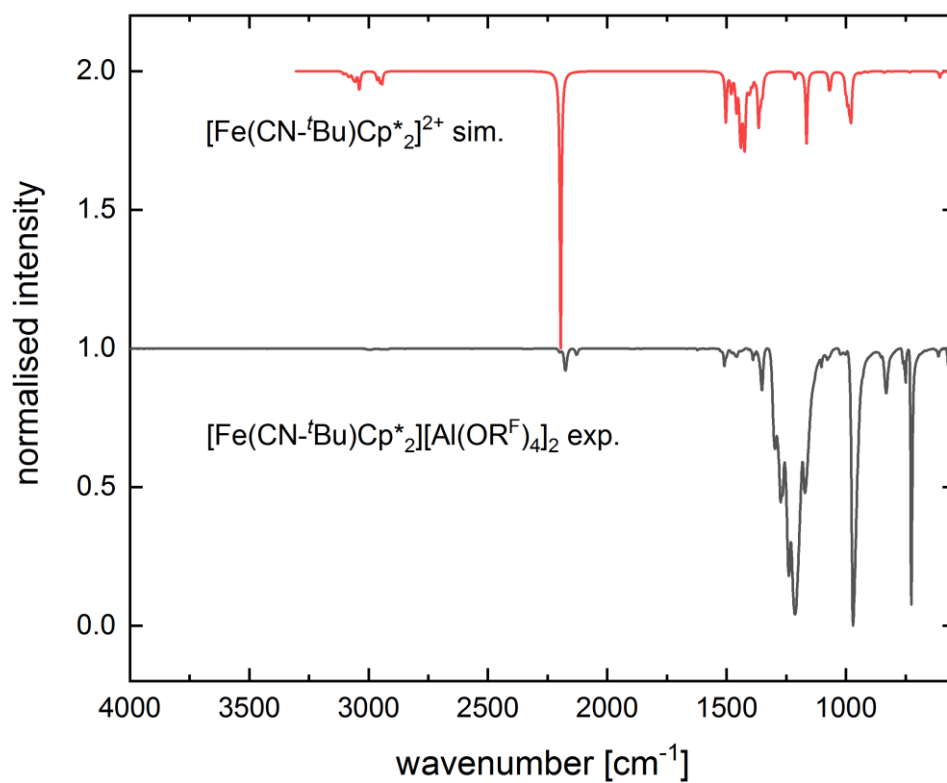

Figure S 40 (black) ATR-FTIR spectrum of **8** together with simulated IR spectrum.

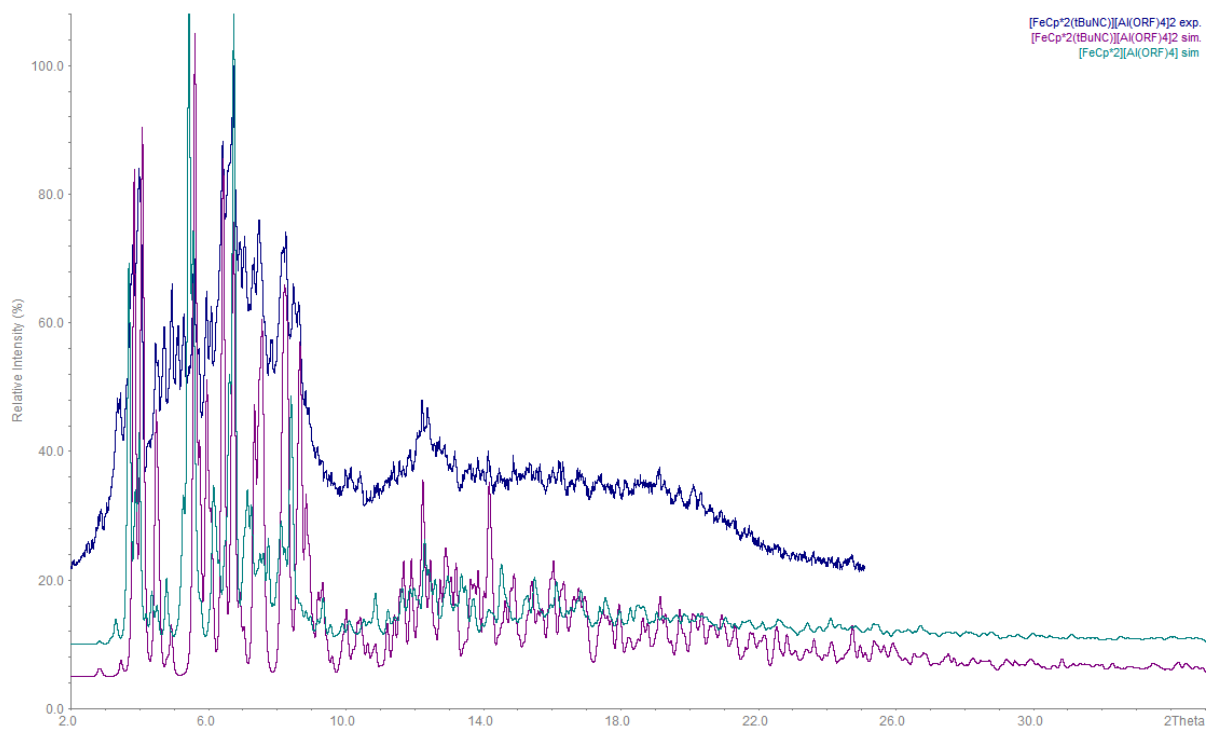

Figure S 41 (blue trace) *pwd*-XRD analysis of bulk material of **8**. (purple trace) simulated powder diffraction pattern from obtained crystalline **8** and (green trace) simulated powder diffraction pattern from obtained crystalline  $[\text{FeCp}^*_2][\text{Al}(\text{OR}^f)_4]$ . Experimental pattern is in good agreement with superposition of the two simulated diffraction patterns.

## S-3 Crystallographic data

|                                                              | <b>2 · oDFB</b>                                                               | <b>3</b>                                                                     | <b>4 (CH<sub>2</sub>Cl<sub>2</sub>)</b>                                                        | <b>4 (oDFB)</b>                                                                |
|--------------------------------------------------------------|-------------------------------------------------------------------------------|------------------------------------------------------------------------------|------------------------------------------------------------------------------------------------|--------------------------------------------------------------------------------|
| Empirical formula                                            | C <sub>36</sub> H <sub>8</sub> F <sub>24</sub> Li <sub>2</sub> N <sub>2</sub> | C <sub>24</sub> F <sub>18</sub> N <sub>2</sub>                               | C <sub>41</sub> H <sub>2</sub> AlCl <sub>2</sub> F <sub>54</sub> N <sub>2</sub> O <sub>4</sub> | C <sub>46</sub> H <sub>4</sub> AlF <sub>56</sub> N <sub>2</sub> O <sub>4</sub> |
| Formula weight                                               | 938.32                                                                        | 658.26                                                                       | 1710.33                                                                                        | 1739.49                                                                        |
| Temperature/K                                                | 100(2)                                                                        | 100(2)                                                                       | 100(2)                                                                                         | 85(2)                                                                          |
| Crystal system                                               | monoclinic                                                                    | triclinic                                                                    | monoclinic                                                                                     | monoclinic                                                                     |
| Space group                                                  | <i>C</i> 2/ <i>c</i> (15)                                                     | <i>P</i> $\bar{1}$ (2)                                                       | <i>P</i> 2 <sub>1</sub> / <i>c</i> (14)                                                        | <i>P</i> 2 <sub>1</sub> / <i>c</i> (14)                                        |
| <i>a</i> /Å                                                  | 33.4501(18)                                                                   | 6.2273(12)                                                                   | 14.8323(5)                                                                                     | 22.3031(14)                                                                    |
| <i>b</i> /Å                                                  | 7.4054(4)                                                                     | 9.1591(17)                                                                   | 32.8612(10)                                                                                    | 58.214(4)                                                                      |
| <i>c</i> /Å                                                  | 27.2418(16)                                                                   | 9.3845(17)                                                                   | 21.9601(7)                                                                                     | 26.4508(17)                                                                    |
| $\alpha$ /°                                                  | 90                                                                            | 99.223(4)                                                                    | 90                                                                                             | 90                                                                             |
| $\beta$ /°                                                   | 96.611(2)                                                                     | 95.085(4)                                                                    | 96.729(2)                                                                                      | 105.964(2)                                                                     |
| $\gamma$ /°                                                  | 90                                                                            | 100.059(4)                                                                   | 90                                                                                             | 90                                                                             |
| Volume/Å <sup>3</sup>                                        | 6703.2(6)                                                                     | 516.46(17)                                                                   | 10629.8(6)                                                                                     | 33018(4)                                                                       |
| <i>Z</i>                                                     | 8                                                                             | 1                                                                            | 8                                                                                              | 24                                                                             |
| $\rho_{\text{calc}}$ /cm <sup>3</sup>                        | 1.860                                                                         | 2.116                                                                        | 2.137                                                                                          | 2.100                                                                          |
| $\mu$ /mm <sup>-1</sup>                                      | 0.203                                                                         | 0.241                                                                        | 0.377                                                                                          | 0.277                                                                          |
| <i>F</i> (000)                                               | 3680                                                                          | 320                                                                          | 6616                                                                                           | 20232                                                                          |
| Crystal size/mm <sup>3</sup>                                 | 0.500×0.130×0.120                                                             | 0.35×0.1×0.08                                                                | 0.25×0.1×0.1                                                                                   | 0.35×0.26×0.18                                                                 |
| Radiation                                                    | MoK $\alpha$ ( $\lambda$ =0.71073 Å)                                          | MoK $\alpha$ ( $\lambda$ =0.71073 Å)                                         | MoK $\alpha$ ( $\lambda$ =0.71073 Å)                                                           | MoK $\alpha$ ( $\lambda$ =0.71073 Å)                                           |
| 2 $\theta$ range /°                                          | 4.10 to 52.84                                                                 | 4.43 to 52.85                                                                | 2.24 to 52.81                                                                                  | 3.76 to 60.77                                                                  |
| Index ranges                                                 | twinned                                                                       | twinned                                                                      | -18 ≤ <i>h</i> ≤ 18; -41 ≤ <i>k</i> ≤ 41; -27 ≤ <i>l</i> ≤ 27                                  | -31 ≤ <i>h</i> ≤ 31, -82 ≤ <i>k</i> ≤ 82, -37 ≤ <i>l</i> ≤ 37                  |
| Reflections collected                                        | 6865                                                                          | 2126                                                                         | 129612                                                                                         | 1932167                                                                        |
| Independent reflections                                      | 6865 [ <i>R</i> <sub>int</sub> = 0.0762, <i>R</i> <sub>sigma</sub> = 0.0338]  | 2126 [ <i>R</i> <sub>int</sub> = 0.0319, <i>R</i> <sub>sigma</sub> = 0.0306] | 21795 [ <i>R</i> <sub>int</sub> = 0.0332, <i>R</i> <sub>sigma</sub> = 0.0262]                  | 99511 [ <i>R</i> <sub>int</sub> = 0.1082, <i>R</i> <sub>sigma</sub> = 0.0400]  |
| Data/restraints/parameters                                   | 6865/380/577                                                                  | 2126/0/199                                                                   | 21795/38145/2890                                                                               | 99511/170559/7158                                                              |
| Goodness-of-fit on <i>F</i> <sup>2</sup>                     | 1.114                                                                         | 1.039                                                                        | 1.058                                                                                          | 1.065                                                                          |
| Final <i>R</i> indexes [ <i>I</i> ≥ 2 $\sigma$ ( <i>I</i> )] | <i>R</i> <sub>1</sub> = 0.0394, <i>wR</i> <sub>2</sub> = 0.0894               | <i>R</i> <sub>1</sub> = 0.0376, <i>wR</i> <sub>2</sub> = 0.0864              | <i>R</i> <sub>1</sub> = 0.0530, <i>wR</i> <sub>2</sub> = 0.1394                                | <i>R</i> <sub>1</sub> = 0.0927, <i>wR</i> <sub>2</sub> = 0.2423                |
| Final <i>R</i> indexes [all data]                            | <i>R</i> <sub>1</sub> = 0.0468, <i>wR</i> <sub>2</sub> = 0.0921               | <i>R</i> <sub>1</sub> = 0.0547, <i>wR</i> <sub>2</sub> = 0.0926              | <i>R</i> <sub>1</sub> = 0.0698, <i>wR</i> <sub>2</sub> = 0.1508                                | <i>R</i> <sub>1</sub> = 0.1324, <i>wR</i> <sub>2</sub> = 0.2667                |
| Largest diff. peak/hole / e Å <sup>-3</sup>                  | 0.35/-0.36                                                                    | 0.36/-0.24                                                                   | 0.74/-0.45                                                                                     | 2.20/-0.90                                                                     |
| CCDC ref.                                                    | 1985540                                                                       | 1985541                                                                      | 1985545                                                                                        | poor quality not uploaded                                                      |

|                                                       | 5                                                                                                | 6                                                                                                 | 7 (vap. dif.)                                                                                       | 7 (layer)                                                                                             |
|-------------------------------------------------------|--------------------------------------------------------------------------------------------------|---------------------------------------------------------------------------------------------------|-----------------------------------------------------------------------------------------------------|-------------------------------------------------------------------------------------------------------|
| Empirical formula                                     | C <sub>48</sub> H <sub>19</sub> Al <sub>2</sub> F <sub>74</sub> N <sub>5</sub> O <sub>8</sub> Sn | C <sub>58</sub> H <sub>24</sub> Al <sub>2</sub> F <sub>74</sub> N <sub>12</sub> O <sub>8</sub> Sn | C <sub>369</sub> H <sub>210</sub> Al <sub>14</sub> F <sub>504</sub> Fe <sub>7</sub> O <sub>61</sub> | C <sub>660</sub> H <sub>376</sub> Al <sub>24</sub> F <sub>872</sub> Fe <sub>12</sub> O <sub>108</sub> |
| Formula weight                                        | 2372.33                                                                                          | 2595.54                                                                                           | 15976.82                                                                                            | 27919.31                                                                                              |
| Temperature/K                                         | 100(2)                                                                                           | 100(2)                                                                                            | 130(2)                                                                                              | 100(2)                                                                                                |
| Crystal system                                        | monoclinic                                                                                       | triclinic                                                                                         | trigonal                                                                                            | orthorhombic                                                                                          |
| Space group                                           | <i>Cc</i> (9)                                                                                    | <i>P</i> $\bar{1}$ (2)                                                                            | <i>R</i> $\bar{3}$ (148)                                                                            | <i>Pna</i> 2 <sub>1</sub> (33)                                                                        |
| a/Å                                                   | 15.4929(8)                                                                                       | 13.7648(9)                                                                                        | 36.874(2)                                                                                           | 22.605(6)                                                                                             |
| b/Å                                                   | 23.5408(12)                                                                                      | 15.3404(10)                                                                                       | 36.874(2)                                                                                           | 26.708(6)                                                                                             |
| c/Å                                                   | 20.7908(12)                                                                                      | 23.5287(15)                                                                                       | 34.387(2)                                                                                           | 38.782(11)                                                                                            |
| $\alpha$ /°                                           | 90                                                                                               | 107.663(2)                                                                                        | 90                                                                                                  | 90                                                                                                    |
| $\beta$ /°                                            | 91.140(2)                                                                                        | 90.055(2)                                                                                         | 90                                                                                                  | 90                                                                                                    |
| $\gamma$ /°                                           | 90                                                                                               | 116.361(2)                                                                                        | 120                                                                                                 | 90                                                                                                    |
| Volume/Å <sup>3</sup>                                 | 7581.2(7)                                                                                        | 4187.9(5)                                                                                         | 40492(5)                                                                                            | 23414(10)                                                                                             |
| Z                                                     | 4                                                                                                | 2                                                                                                 | 3                                                                                                   | 1                                                                                                     |
| $\rho_{\text{calc}}$ /g/cm <sup>3</sup>               | 2.078                                                                                            | 2.058                                                                                             | 1.966                                                                                               | 1.980                                                                                                 |
| $\mu$ /mm <sup>-1</sup>                               | 0.596                                                                                            | 0.552                                                                                             | 0.444                                                                                               | 0.443                                                                                                 |
| F(000)                                                | 4592                                                                                             | 2524                                                                                              | 23455                                                                                               | 13672                                                                                                 |
| Crystal size/mm <sup>3</sup>                          | 0.250×0.200×0.080                                                                                | 0.3×0.25×0.21                                                                                     | 0.3×0.28×0.12                                                                                       | 0.442×0.422×0.246                                                                                     |
| Radiation                                             | MoK $\alpha$ ( $\lambda$ =0.71073 Å)                                                             | MoK $\alpha$ ( $\lambda$ =0.71073 Å)                                                              | MoK $\alpha$ ( $\lambda$ =0.71073 Å)                                                                | MoK $\alpha$ ( $\lambda$ =0.71073 Å)                                                                  |
| 2 $\theta$ range /°                                   | 3.74 to 52.83                                                                                    | 4.07 to 52.88                                                                                     | 3.83 to 52.76                                                                                       | 2.36 to 52.67                                                                                         |
| Index ranges                                          | -19 ≤ h ≤ 19, -29 ≤ k ≤ 29, -26 ≤ l ≤ 26                                                         | -17 ≤ h ≤ 17, -19 ≤ k ≤ 19, -29 ≤ l ≤ 29                                                          | -46 ≤ h ≤ 46, -46 ≤ k ≤ 46, -42 ≤ l ≤ 42                                                            | -28 ≤ h ≤ 28, -33 ≤ k ≤ 33, -48 ≤ l ≤ 48                                                              |
| Reflections collected                                 | 148647                                                                                           | 232532                                                                                            | 802398                                                                                              | 834680                                                                                                |
| Independent reflections                               | 15550 [ <i>R</i> <sub>int</sub> = 0.0922, <i>R</i> <sub>sigma</sub> = 0.0442]                    | 17170 [ <i>R</i> <sub>int</sub> = 0.0337, <i>R</i> <sub>sigma</sub> = 0.0126]                     | 18400 [ <i>R</i> <sub>int</sub> = 0.0666, <i>R</i> <sub>sigma</sub> = 0.0178]                       | 47582, [ <i>R</i> <sub>int</sub> = 0.1567, <i>R</i> <sub>sigma</sub> = 0.0642]                        |
| Data/restraints/parameters                            | 15550/26468/1877                                                                                 | 17170/25656/2033                                                                                  | 18400/64070/3153                                                                                    | 47582/196847/5436                                                                                     |
| Goodness-of-fit on F <sup>2</sup>                     | 0.966                                                                                            | 0.759                                                                                             | 1.017                                                                                               | 1.059                                                                                                 |
| Final R indexes [ <i>I</i> ≥ 2 $\sigma$ ( <i>I</i> )] | <i>R</i> <sub>1</sub> = 0.0189, <i>wR</i> <sub>2</sub> = 0.0371                                  | <i>R</i> <sub>1</sub> = 0.0371, <i>wR</i> <sub>2</sub> = 0.0993                                   | <i>R</i> <sub>1</sub> = 0.0828, <i>wR</i> <sub>2</sub> = 0.2172                                     | <i>R</i> <sub>1</sub> = 0.0906, <i>wR</i> <sub>2</sub> = 0.2502                                       |
| Final R indexes [all data]                            | <i>R</i> <sub>1</sub> = 0.0258, <i>wR</i> <sub>2</sub> = 0.0377                                  | <i>R</i> <sub>1</sub> = 0.0407, <i>wR</i> <sub>2</sub> = 0.1028                                   | <i>R</i> <sub>1</sub> = 0.0934, <i>wR</i> <sub>2</sub> = 0.2285                                     | <i>R</i> <sub>1</sub> = 0.1152, <i>wR</i> <sub>2</sub> = 0.2687                                       |
| Largest diff. peak/hole / e Å <sup>-3</sup>           | 0.27/-0.21                                                                                       | 0.97/-0.93                                                                                        | 1.28/-0.96                                                                                          | 1.36/-1.22                                                                                            |
| CCDC ref.                                             | 1985536                                                                                          | 1985542                                                                                           | not uploaded due to poor quality                                                                    | 1985548                                                                                               |

## 8

|                                               |                                                                                   |
|-----------------------------------------------|-----------------------------------------------------------------------------------|
| Empirical formula                             | C <sub>63</sub> H <sub>43</sub> Al <sub>2</sub> F <sub>74</sub> FeNO <sub>8</sub> |
| Formula weight                                | 2457.79                                                                           |
| Temperature/K                                 | 100(2)                                                                            |
| Crystal system                                | orthorhombic                                                                      |
| Space group                                   | <i>Pna</i> 2 <sub>1</sub> (33)                                                    |
| a/Å                                           | 20.1226(10)                                                                       |
| b/Å                                           | 19.8877(7)                                                                        |
| c/Å                                           | 21.1779(8)                                                                        |
| α/°                                           | 90                                                                                |
| β/°                                           | 90                                                                                |
| γ/°                                           | 90                                                                                |
| Volume/Å <sup>3</sup>                         | 8475.2(6)                                                                         |
| Z                                             | 4                                                                                 |
| ρ <sub>calc</sub> /cm <sup>3</sup>            | 1.926                                                                             |
| μ/mm <sup>-1</sup>                            | 0.415                                                                             |
| F(000)                                        | 4840                                                                              |
| Crystal size/mm <sup>3</sup>                  | 0.300×0.200×0.180                                                                 |
| Radiation                                     | MoK <sub>α</sub> (λ=0.71073 Å)                                                    |
| 2θ range /°                                   | 2.79 to 54.26                                                                     |
| Index ranges                                  | -25 ≤ h ≤ 25, -25 ≤ k ≤ 25, -<br>27 ≤ l ≤ 27                                      |
| Reflections collected                         | 378183                                                                            |
| Independent reflections                       | 18753 [ <i>R</i> <sub>int</sub> = 0.0381, <i>R</i> <sub>sigma</sub><br>= 0.0144]  |
| Data/restraints/parameters                    | 18753/15526/1604                                                                  |
| Goodness-of-fit on F <sup>2</sup>             | 1.060                                                                             |
| Final R indexes [ <i>I</i> ≥ 2σ ( <i>I</i> )] | <i>R</i> <sub>1</sub> = 0.0399, <i>wR</i> <sub>2</sub> = 0.1099                   |
| Final R indexes [all data]                    | <i>R</i> <sub>1</sub> = 0.0411, <i>wR</i> <sub>2</sub> = 0.1113                   |
| Largest diff. peak/hole / e Å <sup>-3</sup>   | 0.81/-0.33                                                                        |
| CCDC ref.                                     | 1985548                                                                           |

|                                                       | S1                                                                                | S2                                                                                                            | S3                                                                                              | S4                                                                                              |
|-------------------------------------------------------|-----------------------------------------------------------------------------------|---------------------------------------------------------------------------------------------------------------|-------------------------------------------------------------------------------------------------|-------------------------------------------------------------------------------------------------|
| Empirical formula                                     | C <sub>34</sub> H <sub>12</sub> AlBr <sub>3</sub> F <sub>36</sub> NO <sub>4</sub> | C <sub>68</sub> H <sub>24</sub> Al <sub>2</sub> Br <sub>4</sub> F <sub>72</sub> N <sub>2</sub> O <sub>8</sub> | C <sub>41</sub> H <sub>21</sub> AlBr <sub>3</sub> F <sub>36</sub> N <sub>3</sub> O <sub>4</sub> | C <sub>61</sub> H <sub>47</sub> AlBr <sub>3</sub> F <sub>36</sub> N <sub>3</sub> O <sub>4</sub> |
| Formula weight                                        | 1449.16                                                                           | 2738.49                                                                                                       | 1570.32                                                                                         | 1836.72                                                                                         |
| Temperature/K                                         | 100(2)                                                                            | 100(2)                                                                                                        | 100(2)                                                                                          | 100(2)                                                                                          |
| Crystal system                                        | monoclinic                                                                        | triclinic                                                                                                     | monoclinic                                                                                      | orthorhombic                                                                                    |
| Space group                                           | <i>P</i> 2 <sub>1</sub> / <i>c</i> (14)                                           | <i>P</i> 1 (1)                                                                                                | <i>P</i> 2 <sub>1</sub> / <i>c</i> (14)                                                         | <i>P</i> bca (61)                                                                               |
| <i>a</i> /Å                                           | 10.5826(3)                                                                        | 10.4545(10)                                                                                                   | 14.1201(18)                                                                                     | 16.8899(7)                                                                                      |
| <i>b</i> /Å                                           | 21.3372(7)                                                                        | 14.7987(13)                                                                                                   | 15.8932(19)                                                                                     | 24.2873(11)                                                                                     |
| <i>c</i> /Å                                           | 20.6368(6)                                                                        | 15.4823(13)                                                                                                   | 23.462(3)                                                                                       | 33.5884(14)                                                                                     |
| $\alpha$ /°                                           | 90                                                                                | 93.013(5)                                                                                                     | 90                                                                                              | 90                                                                                              |
| $\beta$ /°                                            | 100.820(2)                                                                        | 101.553(5)                                                                                                    | 100.597(6)                                                                                      | 90                                                                                              |
| $\gamma$ /°                                           | 90                                                                                | 109.273(5)                                                                                                    | 90                                                                                              | 90                                                                                              |
| Volume/Å <sup>3</sup>                                 | 4577.0(2)                                                                         | 2196.9(3)                                                                                                     | 5175.5(11)                                                                                      | 13778.3(10)                                                                                     |
| Z                                                     | 4                                                                                 | 1                                                                                                             | 4                                                                                               | 8                                                                                               |
| $\rho_{\text{calc}}$ /cm <sup>3</sup>                 | 2.103                                                                             | 2.070                                                                                                         | 2.015                                                                                           | 1.771                                                                                           |
| $\mu$ /mm <sup>-1</sup>                               | 2.852                                                                             | 2.060                                                                                                         | 2.532                                                                                           | 1.916                                                                                           |
| F(000)                                                | 2788                                                                              | 1324                                                                                                          | 3048                                                                                            | 7264                                                                                            |
| Crystal size/mm <sup>3</sup>                          | 0.250×0.250×0.230                                                                 | 0.330×0.110×0.050                                                                                             | 0.360×0.130×0.050                                                                               | 0.500×0.350×0.160                                                                               |
| Radiation                                             | MoK $\alpha$ ( $\lambda$ =0.71073 Å)                                              | MoK $\alpha$ ( $\lambda$ =0.71073 Å)                                                                          | MoK $\alpha$ ( $\lambda$ =0.71073 Å)                                                            | MoK $\alpha$ ( $\lambda$ =0.71073 Å)                                                            |
| 2 $\theta$ range /°                                   | 2.77 to 52.86                                                                     | 2.71 to 52.98                                                                                                 | 2.93 to 52.98                                                                                   | 2.42 to 53.02                                                                                   |
| Index ranges                                          | -13 ≤ <i>h</i> ≤ 13, -25 ≤ <i>k</i> ≤ 26, -25 ≤ <i>l</i> ≤ 25                     | -12 ≤ <i>h</i> ≤ 13, -18 ≤ <i>k</i> ≤ 18, -19 ≤ <i>l</i> ≤ 19                                                 | -17 ≤ <i>h</i> ≤ 17, -19 ≤ <i>k</i> ≤ 19, -27 ≤ <i>l</i> ≤ 29                                   | -21 ≤ <i>h</i> ≤ 21, -29 ≤ <i>k</i> ≤ 30, -42 ≤ <i>l</i> ≤ 42                                   |
| Reflections collected                                 | 112640                                                                            | 52847                                                                                                         | 109470                                                                                          | 218939                                                                                          |
| Independent reflections                               | 9412 [ <i>R</i> <sub>int</sub> = 0.0298, <i>R</i> <sub>sigma</sub> = 0.0154]      | 16534 [ <i>R</i> <sub>int</sub> = 0.0269, <i>R</i> <sub>sigma</sub> = 0.0322]                                 | 10591 [ <i>R</i> <sub>int</sub> = 0.0338, <i>R</i> <sub>sigma</sub> = 0.0223]                   | 14222 [ <i>R</i> <sub>int</sub> = 0.0704, <i>R</i> <sub>sigma</sub> = 0.0281]                   |
| Data/restraints/parameters                            | 9412/2850/712                                                                     | 16534/12437/1463                                                                                              | 10591/2850/795                                                                                  | 14222/4322/1108                                                                                 |
| Goodness-of-fit on F <sup>2</sup>                     | 1.032                                                                             | 1.053                                                                                                         | 1.033                                                                                           | 1.024                                                                                           |
| Final R indexes [ <i>I</i> ≥ 2 $\sigma$ ( <i>I</i> )] | <i>R</i> <sub>1</sub> = 0.0270, <i>wR</i> <sub>2</sub> = 0.0664                   | <i>R</i> <sub>1</sub> = 0.0380, <i>wR</i> <sub>2</sub> = 0.1021                                               | <i>R</i> <sub>1</sub> = 0.0357, <i>wR</i> <sub>2</sub> = 0.0936                                 | <i>R</i> <sub>1</sub> = 0.0304, <i>wR</i> <sub>2</sub> = 0.0652                                 |
| Final R indexes [all data]                            | <i>R</i> <sub>1</sub> = 0.0328, <i>wR</i> <sub>2</sub> = 0.0690                   | <i>R</i> <sub>1</sub> = 0.0437, <i>wR</i> <sub>2</sub> = 0.1056                                               | <i>R</i> <sub>1</sub> = 0.0461, <i>wR</i> <sub>2</sub> = 0.0986                                 | <i>R</i> <sub>1</sub> = 0.0492, <i>wR</i> <sub>2</sub> = 0.0727                                 |
| Largest diff. peak/hole / e Å <sup>-3</sup>           | 0.75/-0.66                                                                        | 1.22/-0.49                                                                                                    | 0.91/-0.59                                                                                      | 0.62/-0.33                                                                                      |
| CCDC ref.                                             | 1985543                                                                           | 1985539                                                                                                       | 1985547                                                                                         | 1985546                                                                                         |



| <b>[FeCp*<sub>2</sub>][Al(OR<sup>F</sup>)<sub>4</sub>] S5</b> |                                                                                  |
|---------------------------------------------------------------|----------------------------------------------------------------------------------|
| Empirical formula                                             | C <sub>36</sub> H <sub>30</sub> AlF <sub>36</sub> FeO <sub>4</sub>               |
| Formula weight                                                | 1293.43                                                                          |
| Temperature/K                                                 | 100(2)                                                                           |
| Crystal system                                                | monoclinic                                                                       |
| Space group                                                   | <i>P</i> 2 <sub>1</sub> / <i>c</i> (14)                                          |
| <i>a</i> /Å                                                   | 34.420(2)                                                                        |
| <i>b</i> /Å                                                   | 20.3939(14)                                                                      |
| <i>c</i> /Å                                                   | 21.0218(15)                                                                      |
| α/°                                                           | 90                                                                               |
| β/°                                                           | 106.022(2)                                                                       |
| γ/°                                                           | 90                                                                               |
| Volume/Å <sup>3</sup>                                         | 14183.0(17)                                                                      |
| Z                                                             | 12                                                                               |
| ρ <sub>calc</sub> /cm <sup>3</sup>                            | 1.817                                                                            |
| μ/mm <sup>-1</sup>                                            | 0.519                                                                            |
| F(000)                                                        | 7692                                                                             |
| Crystal size/mm <sup>3</sup>                                  | 0.42×0.35×0.1                                                                    |
| Radiation                                                     | MoK <sub>α</sub> (λ=0.71073 Å)                                                   |
| 2θ range /°                                                   | 1.23 to 52.79                                                                    |
| Index ranges                                                  | -43 ≤ <i>h</i> ≤ 42, -25 ≤ <i>k</i> ≤ 25, -26 ≤<br><i>l</i> ≤ 26                 |
| Reflections collected                                         | 188228                                                                           |
| Independent reflections                                       | 29000 [ <i>R</i> <sub>int</sub> = 0.0741, <i>R</i> <sub>sigma</sub> =<br>0.0549] |
| Data/restraints/parameters                                    | 29000/52737/3027                                                                 |
| Goodness-of-fit on F <sup>2</sup>                             | 1.088                                                                            |
| Final R indexes [ <i>I</i> ≥ 2σ ( <i>I</i> )]                 | <i>R</i> <sub>1</sub> = 0.1379, <i>wR</i> <sub>2</sub> = 0.3690                  |
| Final R indexes [all data]                                    | <i>R</i> <sub>1</sub> = 0.1563, <i>wR</i> <sub>2</sub> = 0.3797                  |
| Largest diff. peak/hole / e Å <sup>-3</sup>                   | 1.72/-1.04                                                                       |
| CCDC ref.                                                     | Not uploaded due to poor<br>quality                                              |

Table S 5 Atomic coordinates and  $U_{eq}$  [ $\text{\AA}^2$ ] for 2-oDFB

| Atom | x          | y           | z           | $U_{eq}$  |
|------|------------|-------------|-------------|-----------|
| C1   | 0.42163(5) | 0.4277(2)   | 0.31554(6)  | 0.0149(3) |
| F1   | 0.44023(3) | 0.73381(14) | 0.31315(4)  | 0.0208(2) |
| F2   | 0.51820(3) | 0.65127(15) | 0.30690(4)  | 0.0263(2) |
| C2   | 0.45159(5) | 0.5579(2)   | 0.31216(6)  | 0.0161(3) |
| F3   | 0.54237(3) | 0.29886(16) | 0.30853(4)  | 0.0253(2) |
| C3   | 0.49141(5) | 0.5187(2)   | 0.30987(6)  | 0.0185(4) |
| F4   | 0.48688(3) | 0.03331(14) | 0.31299(4)  | 0.0225(2) |
| C4   | 0.50349(5) | 0.3403(3)   | 0.31000(6)  | 0.0184(4) |
| F5   | 0.40874(3) | 0.11295(13) | 0.31760(3)  | 0.0173(2) |
| C5   | 0.47507(5) | 0.2062(2)   | 0.31184(6)  | 0.0169(3) |
| F6   | 0.32157(3) | 0.48717(14) | 0.37791(3)  | 0.0195(2) |
| C6   | 0.43520(5) | 0.2493(2)   | 0.31399(6)  | 0.0150(3) |
| F8   | 0.23681(3) | 0.18755(17) | 0.25375(4)  | 0.0285(3) |
| C8   | 0.31622(5) | 0.4074(2)   | 0.33241(6)  | 0.0165(3) |
| C7   | 0.34959(5) | 0.3989(2)   | 0.30610(6)  | 0.0153(3) |
| F7   | 0.24855(3) | 0.35776(15) | 0.34384(4)  | 0.0231(2) |
| F9   | 0.29999(3) | 0.15440(17) | 0.19960(4)  | 0.0286(3) |
| C9   | 0.27896(5) | 0.3405(2)   | 0.31598(6)  | 0.0185(4) |
| N1A  | 0.38617(4) | 0.8355(2)   | 0.39865(5)  | 0.0145(3) |
| N1   | 0.38414(4) | 0.4886(2)   | 0.32553(5)  | 0.0154(3) |
| C11  | 0.30530(6) | 0.2381(3)   | 0.24347(6)  | 0.0200(4) |
| C10  | 0.27310(5) | 0.2538(3)   | 0.27087(7)  | 0.0201(4) |
| F10  | 0.37188(3) | 0.29847(16) | 0.23099(4)  | 0.0230(2) |
| C12  | 0.34222(5) | 0.3107(2)   | 0.26040(6)  | 0.0176(3) |
| Li1A | 0.38122(9) | 0.7707(4)   | 0.32250(11) | 0.0205(6) |
| C1A  | 0.42432(5) | 0.8957(2)   | 0.41698(6)  | 0.0146(3) |
| F1A  | 0.44328(3) | 0.58921(14) | 0.42119(4)  | 0.0194(2) |
| C2A  | 0.45460(5) | 0.7658(2)   | 0.42569(6)  | 0.0157(3) |
| F2A  | 0.52196(3) | 0.67078(15) | 0.44469(4)  | 0.0240(2) |
| C3A  | 0.49476(5) | 0.8038(2)   | 0.43763(6)  | 0.0176(3) |
| F3A  | 0.54565(3) | 1.02415(15) | 0.45497(4)  | 0.0224(2) |
| C4A  | 0.50668(5) | 0.9822(3)   | 0.44285(6)  | 0.0175(4) |
| F4A  | 0.48963(3) | 1.28900(14) | 0.44171(4)  | 0.0227(2) |
| C5A  | 0.47807(5) | 1.1163(2)   | 0.43633(6)  | 0.0170(3) |
| F5A  | 0.41162(3) | 1.21246(13) | 0.41614(3)  | 0.0177(2) |
| C6A  | 0.43798(5) | 1.0737(2)   | 0.42367(6)  | 0.0151(3) |
| F6A  | 0.32036(3) | 0.83439(15) | 0.33276(3)  | 0.0191(2) |
| C7A  | 0.35236(5) | 0.9276(2)   | 0.41022(6)  | 0.0145(3) |
| F7A  | 0.24849(3) | 0.96554(16) | 0.35212(4)  | 0.0240(2) |
| C8A  | 0.31750(5) | 0.9172(2)   | 0.37692(6)  | 0.0156(3) |
| F8A  | 0.24230(3) | 1.14525(17) | 0.43883(4)  | 0.0283(3) |
| C9A  | 0.28078(5) | 0.9846(2)   | 0.38593(6)  | 0.0180(4) |
| F9A  | 0.30886(3) | 1.17985(16) | 0.50607(4)  | 0.0266(3) |
| C10A | 0.27744(5) | 1.0756(3)   | 0.42948(7)  | 0.0204(4) |
| F10A | 0.37863(3) | 1.03113(15) | 0.48986(3)  | 0.0197(2) |
| C11A | 0.31135(5) | 1.0934(3)   | 0.46331(6)  | 0.0189(4) |
| C12A | 0.34750(5) | 1.0190(2)   | 0.45415(6)  | 0.0160(3) |
| Li1  | 0.38224(9) | 0.5548(4)   | 0.39961(10) | 0.0199(6) |
| C1_1 | 0.36057(6) | 0.5796(2)   | 0.50782(6)  | 0.0204(4) |
| C2_1 | 0.32203(6) | 0.6371(3)   | 0.51035(7)  | 0.0247(4) |
| C3_1 | 0.31258(7) | 0.7335(3)   | 0.55062(8)  | 0.0310(5) |
| H3_1 | 0.285867   | 0.774391    | 0.552424    | 0.037     |
| C4_1 | 0.34282(7) | 0.7697(3)   | 0.58850(8)  | 0.0344(5) |

|      |            |             |            |           |
|------|------------|-------------|------------|-----------|
| H4_1 | 0.336775   | 0.835372    | 0.616675   | 0.041     |
| C5_1 | 0.38159(7) | 0.7113(3)   | 0.58565(8) | 0.0344(5) |
| H5_1 | 0.402067   | 0.737059    | 0.611859   | 0.041     |
| C6_1 | 0.39096(6) | 0.6151(3)   | 0.54475(7) | 0.0263(4) |
| H6_1 | 0.417653   | 0.575024    | 0.542424   | 0.032     |
| F1_1 | 0.36882(3) | 0.48229(16) | 0.46725(4) | 0.0265(3) |
| F2_1 | 0.29346(4) | 0.5991(2)   | 0.47259(4) | 0.0374(3) |
| C1_2 | 0.36924(5) | 0.8125(3)   | 0.20499(6) | 0.0197(4) |
| C2_2 | 0.40454(5) | 0.8856(2)   | 0.19289(6) | 0.0187(4) |
| C3_2 | 0.41357(6) | 0.8779(3)   | 0.14492(6) | 0.0206(4) |
| H3_2 | 0.437896   | 0.928452    | 0.136227   | 0.025     |
| C4_2 | 0.38659(6) | 0.7952(3)   | 0.10953(6) | 0.0235(4) |
| H4_2 | 0.392349   | 0.790022    | 0.076211   | 0.028     |
| C5_2 | 0.35136(6) | 0.7203(3)   | 0.12224(7) | 0.0252(4) |
| H5_2 | 0.333176   | 0.663273    | 0.097676   | 0.030     |
| C6_2 | 0.34240(6) | 0.7278(3)   | 0.17077(7) | 0.0227(4) |
| H6_2 | 0.318377   | 0.675816    | 0.179928   | 0.027     |
| F1_2 | 0.36079(3) | 0.82809(17) | 0.25291(4) | 0.0279(3) |
| F2_2 | 0.43013(3) | 0.96366(16) | 0.22823(4) | 0.0278(3) |

Table S 6 Atomic coordinates and  $U_{eq}$  [ $\text{\AA}^2$ ] for **3**

| Atom | x           | y            | z           | $U_{eq}$  |
|------|-------------|--------------|-------------|-----------|
| F1   | 0.9481(2)   | 0.42111(14)  | 0.79210(13) | 0.0193(3) |
| C1   | 0.6332(3)   | 0.4250(2)    | 0.9155(2)   | 0.0137(4) |
| N1   | 0.6794(3)   | 0.58515(19)  | 0.93919(18) | 0.0135(4) |
| F2   | 0.8557(2)   | 0.11936(15)  | 0.72198(14) | 0.0231(3) |
| C2   | 0.7682(3)   | 0.3460(2)    | 0.8362(2)   | 0.0154(5) |
| C3   | 0.7230(4)   | 0.1908(3)    | 0.8002(2)   | 0.0162(5) |
| F3   | 0.4924(2)   | -0.03909(14) | 0.80850(13) | 0.0216(3) |
| F4   | 0.2272(2)   | 0.10625(14)  | 0.96435(13) | 0.0184(3) |
| C4   | 0.5409(4)   | 0.1112(2)    | 0.8444(2)   | 0.0163(5) |
| C5   | 0.4073(3)   | 0.1871(2)    | 0.9254(2)   | 0.0149(5) |
| F5   | 1.07158(19) | 0.75313(15)  | 0.87437(13) | 0.0202(3) |
| C6   | 0.4532(3)   | 0.3433(2)    | 0.9666(2)   | 0.0141(5) |
| F6   | 1.0953(2)   | 0.86634(15)  | 0.62765(14) | 0.0252(3) |
| C7   | 0.6965(3)   | 0.6456(2)    | 0.8065(2)   | 0.0141(5) |
| F7   | 0.7356(2)   | 0.82018(16)  | 0.42890(14) | 0.0284(4) |
| C8   | 0.8925(3)   | 0.7283(2)    | 0.7784(2)   | 0.0149(5) |
| F8   | 0.3485(2)   | 0.65887(16)  | 0.47817(13) | 0.0238(3) |
| C9   | 0.9057(4)   | 0.7860(3)    | 0.6517(2)   | 0.0184(5) |
| F9   | 0.3245(2)   | 0.54294(14)  | 0.72402(13) | 0.0201(3) |
| C10  | 0.7228(4)   | 0.7626(3)    | 0.5503(2)   | 0.0192(5) |
| C11  | 0.5272(4)   | 0.6822(3)    | 0.5758(2)   | 0.0171(5) |
| C12  | 0.5152(3)   | 0.6234(2)    | 0.7027(2)   | 0.0142(5) |

Table S 7 Atomic coordinates and  $U_{eq}$  [ $\text{\AA}^2$ ] for **4** ( $\text{CH}_2\text{Cl}_2$ )

| Atom | x            | y           | z           | $U_{eq}$    |
|------|--------------|-------------|-------------|-------------|
| Al2  | 0.54004(5)   | 0.26344(2)  | 0.46540(4)  | 0.02049(17) |
| F4   | -0.19575(13) | 0.83901(5)  | 0.44135(8)  | 0.0359(4)   |
| C4   | -0.2369(2)   | 0.78157(10) | 0.38320(14) | 0.0289(6)   |
| Al1  | 0.30480(6)   | 0.50210(3)  | 0.72613(4)  | 0.02083(17) |

|      |              |             |             |            |
|------|--------------|-------------|-------------|------------|
| F6   | 0.04698(14)  | 0.77483(6)  | 0.73531(8)  | 0.0393(5)  |
| C6   | -0.13736(19) | 0.77503(9)  | 0.47737(13) | 0.0229(6)  |
| C5   | -0.1893(2)   | 0.79910(9)  | 0.43391(14) | 0.0262(6)  |
| F5   | -0.02062(13) | 0.82345(5)  | 0.64475(8)  | 0.0344(4)  |
| F7   | 0.04968(12)  | 0.69371(6)  | 0.72024(8)  | 0.0343(4)  |
| C7   | -0.05354(18) | 0.76716(9)  | 0.57741(13) | 0.0230(6)  |
| F8   | -0.01693(13) | 0.65978(5)  | 0.61370(8)  | 0.0361(4)  |
| C8   | -0.0194(2)   | 0.78347(9)  | 0.63427(13) | 0.0266(6)  |
| F9   | 0.06286(12)  | 0.71219(5)  | 0.44798(8)  | 0.0302(4)  |
| C9   | 0.0154(2)    | 0.75882(10) | 0.68167(13) | 0.0281(6)  |
| F00B | 0.78123(12)  | 0.42960(5)  | 0.64625(8)  | 0.0316(4)  |
| F10  | 0.13286(13)  | 0.64589(6)  | 0.39669(10) | 0.0418(5)  |
| C10  | 0.0164(2)    | 0.71697(10) | 0.67374(14) | 0.0281(6)  |
| F12  | -0.07561(14) | 0.56262(6)  | 0.48442(11) | 0.0451(5)  |
| C12  | -0.05230(18) | 0.72457(9)  | 0.56933(13) | 0.0233(6)  |
| C11  | -0.0175(2)   | 0.70020(9)  | 0.61882(14) | 0.0268(6)  |
| F11  | 0.06445(14)  | 0.57099(6)  | 0.41608(11) | 0.0457(5)  |
| C14  | 0.0290(2)    | 0.67536(9)  | 0.45690(13) | 0.0258(6)  |
| F14  | 0.08171(12)  | 0.79880(5)  | 0.48822(8)  | 0.0328(4)  |
| C13  | -0.0438(2)   | 0.67164(9)  | 0.49070(14) | 0.0260(6)  |
| F13  | -0.15024(13) | 0.62888(6)  | 0.53005(9)  | 0.0385(4)  |
| F15  | 0.17309(12)  | 0.87040(6)  | 0.48789(9)  | 0.0406(5)  |
| C15  | 0.0649(2)    | 0.64152(10) | 0.43126(15) | 0.0306(7)  |
| F18  | -0.16508(12) | 0.86568(5)  | 0.55974(8)  | 0.0318(4)  |
| C18  | -0.0790(2)   | 0.63321(10) | 0.49915(14) | 0.0301(7)  |
| C17  | -0.0422(2)   | 0.59927(9)  | 0.47504(16) | 0.0326(7)  |
| F17  | -0.07478(13) | 0.93774(5)  | 0.55773(9)  | 0.0368(4)  |
| C16  | 0.0300(2)    | 0.60386(10) | 0.44039(15) | 0.0329(7)  |
| F16  | 0.09419(13)  | 0.93959(6)  | 0.52294(9)  | 0.0393(4)  |
| C19  | -0.04317(19) | 0.83148(9)  | 0.52345(13) | 0.0240(6)  |
| C24  | -0.0828(2)   | 0.86709(9)  | 0.54102(13) | 0.0258(6)  |
| C23  | -0.0365(2)   | 0.90350(9)  | 0.54089(14) | 0.0288(6)  |
| C22  | 0.0497(2)    | 0.90440(10) | 0.52325(14) | 0.0302(7)  |
| C21  | 0.0898(2)    | 0.86931(10) | 0.50508(14) | 0.0296(7)  |
| C20  | 0.0433(2)    | 0.83294(9)  | 0.50489(13) | 0.0262(6)  |
| F3   | -0.28638(13) | 0.80457(6)  | 0.34246(9)  | 0.0393(5)  |
| C3   | -0.2356(2)   | 0.73976(10) | 0.37523(14) | 0.0287(6)  |
| N2   | -0.08514(16) | 0.79209(7)  | 0.52802(11) | 0.0226(5)  |
| F2   | -0.28355(13) | 0.72331(6)  | 0.32664(8)  | 0.0384(4)  |
| C2   | -0.1879(2)   | 0.71541(9)  | 0.41814(14) | 0.0278(6)  |
| N1   | -0.08306(16) | 0.70839(7)  | 0.51209(11) | 0.0245(5)  |
| F1   | -0.19348(13) | 0.67536(5)  | 0.41072(9)  | 0.0369(4)  |
| C1   | -0.13626(19) | 0.73237(9)  | 0.46938(13) | 0.0232(6)  |
| O1_3 | 0.3514(2)    | 0.53779(11) | 0.77930(14) | 0.0273(7)  |
| C1_3 | 0.3660(4)    | 0.55162(17) | 0.8372(3)   | 0.0283(13) |
| C2_3 | 0.3961(4)    | 0.59692(17) | 0.8345(2)   | 0.0405(11) |
| F1_3 | 0.3235(2)    | 0.62095(9)  | 0.81975(14) | 0.0495(8)  |
| F2_3 | 0.4358(2)    | 0.61073(9)  | 0.88891(13) | 0.0466(8)  |
| F3_3 | 0.4515(2)    | 0.60338(10) | 0.79361(14) | 0.0456(8)  |
| C3_3 | 0.4445(4)    | 0.52726(19) | 0.8741(3)   | 0.0415(14) |
| F4_3 | 0.4377(2)    | 0.48821(8)  | 0.86221(13) | 0.0449(8)  |
| F5_3 | 0.5263(2)    | 0.53965(14) | 0.86046(18) | 0.0573(10) |
| F6_3 | 0.4448(3)    | 0.53164(13) | 0.93521(16) | 0.0527(10) |
| C4_3 | 0.2801(4)    | 0.5489(2)   | 0.8705(3)   | 0.0396(14) |
| F7_3 | 0.2688(4)    | 0.51028(13) | 0.8895(2)   | 0.0554(12) |

|      |             |             |             |            |
|------|-------------|-------------|-------------|------------|
| F8_3 | 0.2829(3)   | 0.57252(13) | 0.91979(18) | 0.0478(10) |
| F9_3 | 0.2065(2)   | 0.55817(14) | 0.83323(15) | 0.0544(9)  |
| O1_4 | 0.1988(6)   | 0.5172(3)   | 0.6911(4)   | 0.0294(19) |
| C1_4 | 0.1528(4)   | 0.54393(19) | 0.6513(3)   | 0.0292(13) |
| C2_4 | 0.1834(5)   | 0.5396(2)   | 0.5861(3)   | 0.0469(17) |
| F1_4 | 0.2599(2)   | 0.55963(14) | 0.58248(19) | 0.0532(10) |
| F2_4 | 0.1211(3)   | 0.5544(2)   | 0.54259(18) | 0.0728(16) |
| F3_4 | 0.1985(3)   | 0.50064(16) | 0.5735(2)   | 0.0580(13) |
| C3_4 | 0.0503(3)   | 0.53339(16) | 0.6476(2)   | 0.0366(11) |
| F4_4 | 0.02699(19) | 0.52552(13) | 0.70343(15) | 0.0488(9)  |
| F5_4 | 0.0313(4)   | 0.50001(18) | 0.6147(2)   | 0.0595(14) |
| F6_4 | -0.0043(2)  | 0.56302(14) | 0.62302(18) | 0.0509(10) |
| C4_4 | 0.1671(4)   | 0.58834(17) | 0.6737(3)   | 0.0437(12) |
| F7_4 | 0.1191(3)   | 0.59601(14) | 0.7206(2)   | 0.0568(11) |
| F8_4 | 0.1407(2)   | 0.61537(11) | 0.62845(19) | 0.0628(11) |
| F9_4 | 0.2523(2)   | 0.59548(9)  | 0.69268(17) | 0.0515(10) |
| O1_5 | 0.2932(5)   | 0.45816(15) | 0.7651(2)   | 0.0287(12) |
| C1_5 | 0.2558(5)   | 0.4202(2)   | 0.7642(3)   | 0.0401(18) |
| C2_5 | 0.3356(6)   | 0.3894(3)   | 0.7835(5)   | 0.067(2)   |
| F1_5 | 0.3973(5)   | 0.40330(18) | 0.8254(4)   | 0.0754(17) |
| F2_5 | 0.3037(5)   | 0.35391(15) | 0.8023(4)   | 0.095(2)   |
| F3_5 | 0.3780(6)   | 0.3809(3)   | 0.7350(4)   | 0.095(3)   |
| C3_5 | 0.1992(7)   | 0.4099(2)   | 0.7036(3)   | 0.084(2)   |
| F4_5 | 0.1190(5)   | 0.4296(2)   | 0.6996(3)   | 0.106(2)   |
| F5_5 | 0.2416(6)   | 0.42134(19) | 0.6571(2)   | 0.127(3)   |
| F6_5 | 0.1897(6)   | 0.36876(17) | 0.6992(3)   | 0.098(2)   |
| C4_5 | 0.1935(6)   | 0.4184(3)   | 0.8165(4)   | 0.0444(18) |
| F7_5 | 0.1446(6)   | 0.4512(2)   | 0.8194(3)   | 0.0610(19) |
| F8_5 | 0.1401(5)   | 0.3858(3)   | 0.8128(3)   | 0.058(2)   |
| F9_5 | 0.2445(5)   | 0.41657(19) | 0.8708(3)   | 0.0784(17) |
| O1_6 | 0.3732(7)   | 0.5005(4)   | 0.6681(5)   | 0.027(2)   |
| C1_6 | 0.4589(5)   | 0.4999(2)   | 0.6534(3)   | 0.0275(14) |
| C2_6 | 0.5088(4)   | 0.54083(19) | 0.6706(4)   | 0.0642(18) |
| F1_6 | 0.5401(3)   | 0.54008(19) | 0.7305(2)   | 0.0902(18) |
| F2_6 | 0.5767(3)   | 0.54724(14) | 0.6357(3)   | 0.0893(18) |
| F3_6 | 0.4513(3)   | 0.57158(13) | 0.6596(3)   | 0.0756(15) |
| C3_6 | 0.4559(4)   | 0.4932(3)   | 0.5837(3)   | 0.073(2)   |
| F4_6 | 0.3950(3)   | 0.4674(2)   | 0.5628(2)   | 0.0962(18) |
| F5_6 | 0.4295(6)   | 0.5287(4)   | 0.5553(5)   | 0.105(2)   |
| F6_6 | 0.5359(2)   | 0.48085(19) | 0.56728(15) | 0.0717(17) |
| C4_6 | 0.5141(4)   | 0.4642(2)   | 0.6863(3)   | 0.0471(16) |
| F7_6 | 0.4866(4)   | 0.42919(13) | 0.6611(3)   | 0.0945(19) |
| F8_6 | 0.6039(4)   | 0.4693(3)   | 0.6832(3)   | 0.060(2)   |
| F9_6 | 0.5014(10)  | 0.4649(4)   | 0.7447(5)   | 0.057(2)   |
| O1_7 | 0.5740(3)   | 0.28029(11) | 0.53925(15) | 0.0304(8)  |
| C1_7 | 0.5805(3)   | 0.31200(12) | 0.57863(18) | 0.0327(9)  |
| C2_7 | 0.6088(3)   | 0.35200(12) | 0.54811(19) | 0.0370(9)  |
| F1_7 | 0.69558(19) | 0.35081(8)  | 0.53957(14) | 0.0559(7)  |
| F2_7 | 0.5968(4)   | 0.38526(12) | 0.58010(17) | 0.0564(10) |
| F3_7 | 0.5635(2)   | 0.35656(7)  | 0.49328(11) | 0.0535(8)  |
| C3_7 | 0.4886(3)   | 0.31934(15) | 0.6047(2)   | 0.0542(12) |
| F4_7 | 0.4511(3)   | 0.28417(12) | 0.6169(2)   | 0.0851(13) |
| F5_7 | 0.4308(2)   | 0.33919(11) | 0.56373(16) | 0.0749(10) |
| F6_7 | 0.4989(3)   | 0.34099(13) | 0.6564(2)   | 0.0768(13) |
| C4_7 | 0.6548(4)   | 0.30119(14) | 0.6330(2)   | 0.0499(12) |

|         |             |             |             |             |
|---------|-------------|-------------|-------------|-------------|
| F7_7    | 0.6232(3)   | 0.27520(9)  | 0.67068(13) | 0.0720(10)  |
| F8_7    | 0.6832(3)   | 0.33438(9)  | 0.66517(14) | 0.0693(10)  |
| F9_7    | 0.72713(19) | 0.28495(9)  | 0.61214(13) | 0.0594(8)   |
| O1_8    | 0.43661(14) | 0.28484(7)  | 0.44044(10) | 0.0318(5)   |
| C1_8    | 0.3773(2)   | 0.29671(9)  | 0.39224(14) | 0.0296(6)   |
| C2_8    | 0.3385(3)   | 0.25865(11) | 0.35675(19) | 0.0535(10)  |
| F1_8    | 0.27837(19) | 0.23940(8)  | 0.38791(14) | 0.0752(8)   |
| F2_8    | 0.29667(18) | 0.26753(7)  | 0.30160(12) | 0.0668(7)   |
| F3_8    | 0.40543(19) | 0.23267(7)  | 0.34891(12) | 0.0687(8)   |
| C3_8    | 0.4209(2)   | 0.32554(11) | 0.34829(15) | 0.0362(7)   |
| F4_8    | 0.47860(13) | 0.35051(6)  | 0.37856(9)  | 0.0438(5)   |
| F5_8    | 0.46733(16) | 0.30447(9)  | 0.31008(10) | 0.0596(7)   |
| F6_8    | 0.35844(14) | 0.34792(7)  | 0.31410(9)  | 0.0471(5)   |
| C4_8    | 0.3000(2)   | 0.31950(11) | 0.41901(16) | 0.0395(8)   |
| F7_8    | 0.32581(15) | 0.35684(6)  | 0.43613(10) | 0.0472(5)   |
| F8_8    | 0.22476(12) | 0.32206(7)  | 0.37774(11) | 0.0475(5)   |
| F9_8    | 0.27595(15) | 0.30019(8)  | 0.46740(11) | 0.0580(6)   |
| O1_9    | 0.6128(5)   | 0.2766(3)   | 0.4130(3)   | 0.0260(15)  |
| C1_9    | 0.6910(4)   | 0.26892(15) | 0.3895(2)   | 0.0261(11)  |
| C2_9    | 0.6960(4)   | 0.22498(15) | 0.3651(2)   | 0.0526(13)  |
| F1_9    | 0.7170(6)   | 0.19877(16) | 0.4099(4)   | 0.077(2)    |
| F2_9    | 0.7574(4)   | 0.22127(15) | 0.3253(3)   | 0.0805(16)  |
| F3_9    | 0.6165(5)   | 0.21338(19) | 0.3381(3)   | 0.0718(16)  |
| C3_9    | 0.6977(3)   | 0.29927(14) | 0.3361(2)   | 0.0380(11)  |
| F4_9    | 0.6707(4)   | 0.33545(18) | 0.3494(3)   | 0.0543(14)  |
| F5_9    | 0.6455(7)   | 0.2878(3)   | 0.2868(3)   | 0.074(2)    |
| F6_9    | 0.7823(3)   | 0.30234(16) | 0.32080(18) | 0.0458(10)  |
| C4_9    | 0.7732(3)   | 0.27572(15) | 0.43938(19) | 0.0385(11)  |
| F7_9    | 0.7880(5)   | 0.31446(18) | 0.4501(3)   | 0.0654(15)  |
| F8_9    | 0.8502(3)   | 0.26022(17) | 0.4251(2)   | 0.0535(13)  |
| F9_9    | 0.7561(6)   | 0.2591(2)   | 0.4917(2)   | 0.0469(14)  |
| O1_10   | 0.5340(10)  | 0.21156(19) | 0.4703(5)   | 0.033(3)    |
| C1_10   | 0.5107(5)   | 0.1768(2)   | 0.4967(3)   | 0.0298(16)  |
| C2_10   | 0.4625(3)   | 0.18519(15) | 0.5548(2)   | 0.0375(12)  |
| F1_10   | 0.5214(3)   | 0.19598(18) | 0.6020(2)   | 0.0531(12)  |
| F2_10   | 0.4171(8)   | 0.1527(3)   | 0.5710(4)   | 0.0473(17)  |
| F3_10   | 0.4029(9)   | 0.2153(3)   | 0.5445(7)   | 0.0476(19)  |
| C3_10   | 0.4473(4)   | 0.15155(16) | 0.4502(3)   | 0.0472(14)  |
| F4_10   | 0.4768(9)   | 0.1526(4)   | 0.3949(4)   | 0.069(2)    |
| F5_10   | 0.3646(5)   | 0.1668(3)   | 0.4445(3)   | 0.0678(18)  |
| F6_10   | 0.4447(4)   | 0.11228(14) | 0.4681(3)   | 0.0640(15)  |
| C4_10   | 0.6005(4)   | 0.15186(15) | 0.5160(2)   | 0.0404(13)  |
| F7_10   | 0.6289(4)   | 0.1340(2)   | 0.4678(2)   | 0.0497(14)  |
| F8_10   | 0.5878(8)   | 0.12241(19) | 0.5570(4)   | 0.069(2)    |
| F9_10   | 0.6638(6)   | 0.1759(4)   | 0.5421(6)   | 0.059(2)    |
| Cl1_11  | 0.04217(6)  | 0.29951(3)  | 0.68899(4)  | 0.0412(2)   |
| Cl2_11  | 0.01068(6)  | 0.21385(3)  | 0.65660(4)  | 0.04001(19) |
| C1_11   | -0.0319(3)  | 0.25760(11) | 0.69005(18) | 0.0442(9)   |
| H1A_11  | -0.091512   | 0.264783    | 0.667521    | 0.053       |
| H1AB_11 | -0.041283   | 0.251488    | 0.732995    | 0.053       |
| Cl1_12  | 0.70345(6)  | 0.04643(3)  | 0.55305(4)  | 0.0410(2)   |
| Cl2_12  | 0.70627(6)  | -0.04233(3) | 0.55830(4)  | 0.03761(19) |
| C1_12   | 0.7708(2)   | 0.00232(10) | 0.55146(16) | 0.0374(7)   |
| H1A_12  | 0.820761    | 0.003411    | 0.585528    | 0.045       |
| H1AB_12 | 0.798141    | 0.001465    | 0.512465    | 0.045       |

|       |            |             |            |            |
|-------|------------|-------------|------------|------------|
| O1_19 | 0.5341(19) | 0.2112(3)   | 0.4653(9)  | 0.020(4)   |
| C1_19 | 0.5176(7)  | 0.1770(4)   | 0.4962(5)  | 0.027(3)   |
| C2_19 | 0.4208(6)  | 0.1771(3)   | 0.5156(5)  | 0.039(2)   |
| F1_19 | 0.3584(8)  | 0.1702(5)   | 0.4681(5)  | 0.057(3)   |
| F2_19 | 0.4046(18) | 0.1499(8)   | 0.5574(10) | 0.059(4)   |
| F3_19 | 0.4024(19) | 0.2140(6)   | 0.5369(14) | 0.047(3)   |
| C3_19 | 0.5875(6)  | 0.1715(3)   | 0.5546(4)  | 0.031(2)   |
| F4_19 | 0.6695(10) | 0.1830(8)   | 0.5443(9)  | 0.043(3)   |
| F5_19 | 0.5647(6)  | 0.1946(3)   | 0.6005(4)  | 0.0419(19) |
| F6_19 | 0.5911(13) | 0.1328(3)   | 0.5728(7)  | 0.047(3)   |
| C4_19 | 0.5286(7)  | 0.1399(3)   | 0.4537(4)  | 0.044(2)   |
| F7_19 | 0.6121(9)  | 0.1337(5)   | 0.4454(5)  | 0.054(3)   |
| F8_19 | 0.4948(8)  | 0.1058(3)   | 0.4744(6)  | 0.067(3)   |
| F9_19 | 0.4841(15) | 0.1481(5)   | 0.3979(6)  | 0.045(3)   |
| O1_2  | 0.2020(10) | 0.5239(6)   | 0.7036(8)  | 0.025(3)   |
| C1_2  | 0.1396(8)  | 0.5375(3)   | 0.6591(5)  | 0.033(3)   |
| C2_2  | 0.0864(6)  | 0.5724(3)   | 0.6864(4)  | 0.046(2)   |
| F1_2  | 0.1312(6)  | 0.6069(2)   | 0.6893(5)  | 0.058(2)   |
| F2_2  | 0.0059(5)  | 0.5780(3)   | 0.6522(5)  | 0.059(2)   |
| F3_2  | 0.0687(5)  | 0.5637(2)   | 0.7414(3)  | 0.063(2)   |
| C3_2  | 0.0734(7)  | 0.5020(3)   | 0.6411(5)  | 0.045(2)   |
| F4_2  | 0.1191(5)  | 0.46832(19) | 0.6309(3)  | 0.062(2)   |
| F5_2  | 0.0221(4)  | 0.4937(2)   | 0.6848(4)  | 0.0546(18) |
| F6_2  | 0.0211(9)  | 0.5096(3)   | 0.5897(5)  | 0.059(3)   |
| C4_2  | 0.1830(7)  | 0.5538(3)   | 0.6034(5)  | 0.042(3)   |
| F7_2  | 0.2089(8)  | 0.5227(3)   | 0.5703(5)  | 0.060(2)   |
| F8_2  | 0.1246(5)  | 0.5774(3)   | 0.5687(4)  | 0.067(2)   |
| F9_2  | 0.2570(4)  | 0.5760(2)   | 0.6201(4)  | 0.0529(18) |
| O1_13 | 0.3789(13) | 0.5076(7)   | 0.6728(10) | 0.030(4)   |
| C1_13 | 0.4478(8)  | 0.4952(3)   | 0.6426(5)  | 0.029(2)   |
| C2_13 | 0.4719(5)  | 0.5309(3)   | 0.6013(4)  | 0.045(2)   |
| F1_13 | 0.4758(6)  | 0.5649(2)   | 0.6300(4)  | 0.0582(18) |
| F2_13 | 0.5529(4)  | 0.5242(3)   | 0.5818(4)  | 0.068(3)   |
| F3_13 | 0.4090(10) | 0.5364(5)   | 0.5524(8)  | 0.082(3)   |
| C3_13 | 0.4174(6)  | 0.4572(3)   | 0.6019(4)  | 0.056(2)   |
| F4_13 | 0.3303(5)  | 0.4605(2)   | 0.5802(3)  | 0.069(2)   |
| F5_13 | 0.4659(6)  | 0.4518(3)   | 0.5577(3)  | 0.077(3)   |
| F6_13 | 0.4231(6)  | 0.4238(2)   | 0.6363(3)  | 0.0620(19) |
| C4_13 | 0.5305(6)  | 0.4837(3)   | 0.6899(5)  | 0.037(2)   |
| F7_13 | 0.5057(17) | 0.4612(6)   | 0.7351(8)  | 0.050(3)   |
| F8_13 | 0.5899(8)  | 0.4603(4)   | 0.6631(5)  | 0.054(3)   |
| F9_13 | 0.5759(5)  | 0.5158(2)   | 0.7100(3)  | 0.066(2)   |
| O1_14 | 0.286(3)   | 0.4536(6)   | 0.7484(19) | 0.042(6)   |
| C1_14 | 0.2586(12) | 0.4187(5)   | 0.7714(8)  | 0.043(4)   |
| C2_14 | 0.3087(13) | 0.3833(5)   | 0.7432(8)  | 0.045(4)   |
| F1_14 | 0.3918(13) | 0.3891(7)   | 0.7768(12) | 0.059(3)   |
| F2_14 | 0.2768(15) | 0.3475(4)   | 0.7566(9)  | 0.050(4)   |
| F3_14 | 0.3240(15) | 0.3848(5)   | 0.6867(7)  | 0.049(3)   |
| C3_14 | 0.1557(12) | 0.4153(7)   | 0.7657(11) | 0.067(4)   |
| F4_14 | 0.1217(17) | 0.4501(8)   | 0.7821(15) | 0.071(4)   |
| F5_14 | 0.125(2)   | 0.4102(10)  | 0.7069(12) | 0.088(4)   |
| F6_14 | 0.124(3)   | 0.3867(11)  | 0.7996(18) | 0.063(4)   |
| C4_14 | 0.3036(14) | 0.4148(7)   | 0.8397(8)  | 0.066(5)   |
| F7_14 | 0.253(2)   | 0.4315(10)  | 0.8778(13) | 0.075(4)   |
| F8_14 | 0.315(2)   | 0.3761(7)   | 0.8539(13) | 0.083(5)   |

|       |            |            |            |            |
|-------|------------|------------|------------|------------|
| F9_14 | 0.3869(14) | 0.4310(8)  | 0.8399(13) | 0.074(4)   |
| O1_15 | 0.6155(16) | 0.2744(10) | 0.4144(13) | 0.037(6)   |
| C1_15 | 0.6937(10) | 0.2708(4)  | 0.3900(6)  | 0.034(3)   |
| C2_15 | 0.6753(11) | 0.2510(5)  | 0.3253(6)  | 0.066(4)   |
| F1_15 | 0.644(2)   | 0.2789(7)  | 0.2842(11) | 0.058(4)   |
| F2_15 | 0.7512(14) | 0.2363(6)  | 0.3083(9)  | 0.086(4)   |
| F3_15 | 0.6126(18) | 0.2228(8)  | 0.3243(12) | 0.089(5)   |
| C3_15 | 0.7598(9)  | 0.2421(5)  | 0.4300(6)  | 0.051(3)   |
| F4_15 | 0.761(2)   | 0.2483(8)  | 0.4886(7)  | 0.059(4)   |
| F5_15 | 0.7355(18) | 0.2031(5)  | 0.4221(12) | 0.066(4)   |
| F6_15 | 0.8401(10) | 0.2449(6)  | 0.4105(9)  | 0.060(4)   |
| C4_15 | 0.7401(9)  | 0.3129(4)  | 0.3843(7)  | 0.052(3)   |
| F7_15 | 0.7822(18) | 0.3253(7)  | 0.4378(8)  | 0.069(4)   |
| F8_15 | 0.8000(10) | 0.3118(6)  | 0.3436(7)  | 0.058(3)   |
| F9_15 | 0.6788(16) | 0.3409(7)  | 0.3682(11) | 0.067(4)   |
| O1_16 | 0.3469(6)  | 0.5184(3)  | 0.7977(4)  | 0.0306(18) |
| C1_16 | 0.3730(8)  | 0.5499(4)  | 0.8349(5)  | 0.032(3)   |
| C2_16 | 0.3981(8)  | 0.5874(3)  | 0.7968(5)  | 0.048(2)   |
| F1_16 | 0.3366(6)  | 0.5924(2)  | 0.7481(3)  | 0.059(2)   |
| F2_16 | 0.4039(7)  | 0.6213(3)  | 0.8309(4)  | 0.061(2)   |
| F3_16 | 0.4786(6)  | 0.5818(3)  | 0.7768(4)  | 0.055(2)   |
| C3_16 | 0.4584(9)  | 0.5365(4)  | 0.8787(6)  | 0.046(3)   |
| F4_16 | 0.4345(8)  | 0.5125(3)  | 0.9226(5)  | 0.059(2)   |
| F5_16 | 0.5155(6)  | 0.5158(3)  | 0.8475(4)  | 0.057(2)   |
| F6_16 | 0.5025(6)  | 0.5686(3)  | 0.9043(4)  | 0.065(3)   |
| C4_16 | 0.2955(9)  | 0.5614(4)  | 0.8733(6)  | 0.046(3)   |
| F7_16 | 0.2551(10) | 0.5281(3)  | 0.8917(7)  | 0.060(3)   |
| F8_16 | 0.3263(8)  | 0.5810(3)  | 0.9252(5)  | 0.056(3)   |
| F9_16 | 0.2361(7)  | 0.5854(4)  | 0.8411(5)  | 0.078(3)   |
| O1_17 | 0.565(3)   | 0.2866(10) | 0.5326(10) | 0.059(7)   |
| C1_17 | 0.5655(12) | 0.3121(6)  | 0.5797(8)  | 0.047(4)   |
| C2_17 | 0.6485(13) | 0.3034(6)  | 0.6279(9)  | 0.069(5)   |
| F1_17 | 0.7248(13) | 0.3142(8)  | 0.6065(11) | 0.079(4)   |
| F2_17 | 0.6363(19) | 0.3242(8)  | 0.6782(9)  | 0.079(5)   |
| F3_17 | 0.6574(18) | 0.2639(6)  | 0.6385(13) | 0.088(7)   |
| C3_17 | 0.4787(13) | 0.3043(7)  | 0.6107(10) | 0.074(4)   |
| F4_17 | 0.4065(11) | 0.3017(7)  | 0.5692(10) | 0.070(5)   |
| F5_17 | 0.488(2)   | 0.2683(8)  | 0.6396(14) | 0.096(5)   |
| F6_17 | 0.467(2)   | 0.3343(10) | 0.6488(16) | 0.083(5)   |
| C4_17 | 0.5743(14) | 0.3551(6)  | 0.5520(10) | 0.059(5)   |
| F7_17 | 0.4953(15) | 0.3667(8)  | 0.5225(12) | 0.103(8)   |
| F8_17 | 0.601(3)   | 0.3817(10) | 0.5954(13) | 0.067(5)   |
| F9_17 | 0.6372(14) | 0.3527(6)  | 0.5131(10) | 0.057(3)   |
| O1_18 | 0.2899(11) | 0.4496(3)  | 0.7359(7)  | 0.032(3)   |
| C1_18 | 0.2670(9)  | 0.4158(4)  | 0.7664(5)  | 0.036(3)   |
| C2_18 | 0.2173(8)  | 0.3861(4)  | 0.7202(5)  | 0.062(3)   |
| F1_18 | 0.2609(7)  | 0.3842(3)  | 0.6711(4)  | 0.068(2)   |
| F2_18 | 0.2186(8)  | 0.3481(2)  | 0.7426(5)  | 0.066(2)   |
| F3_18 | 0.1293(7)  | 0.3914(4)  | 0.7016(6)  | 0.085(4)   |
| C3_18 | 0.2057(10) | 0.4263(5)  | 0.8167(7)  | 0.050(3)   |
| F4_18 | 0.2551(9)  | 0.4421(4)  | 0.8654(5)  | 0.072(3)   |
| F5_18 | 0.1481(13) | 0.4556(6)  | 0.7987(8)  | 0.066(3)   |
| F6_18 | 0.1601(10) | 0.3945(4)  | 0.8343(6)  | 0.061(3)   |
| C4_18 | 0.3559(9)  | 0.3945(4)  | 0.7979(6)  | 0.043(3)   |
| F7_18 | 0.4114(8)  | 0.4213(4)  | 0.8282(6)  | 0.057(3)   |



|       |             |             |             |           |
|-------|-------------|-------------|-------------|-----------|
| F8_18 | 0.3386(10)  | 0.3657(4)   | 0.8383(6)   | 0.074(3)  |
| F9_18 | 0.4010(9)   | 0.3767(5)   | 0.7571(5)   | 0.054(3)  |
| N1_1  | 0.85813(16) | 0.55408(7)  | 0.75407(11) | 0.0227(5) |
| F1_1  | 0.79770(13) | 0.59455(6)  | 0.64489(8)  | 0.0355(4) |
| C1_1  | 0.82386(18) | 0.53365(9)  | 0.70118(12) | 0.0215(6) |
| N2_1  | 0.85257(16) | 0.47007(7)  | 0.75543(10) | 0.0222(5) |
| F2_1  | 0.73016(13) | 0.55339(6)  | 0.54455(8)  | 0.0399(5) |
| C3_1  | 0.7580(2)   | 0.53342(10) | 0.59554(13) | 0.0296(7) |
| F3_1  | 0.72279(13) | 0.47117(7)  | 0.54597(8)  | 0.0391(5) |
| C4_1  | 0.7549(2)   | 0.49133(10) | 0.59616(13) | 0.0287(7) |
| F4_1  | 0.95940(14) | 0.42949(6)  | 0.85224(9)  | 0.0418(5) |
| C5_1  | 0.78532(19) | 0.47024(9)  | 0.64823(13) | 0.0252(6) |
| F5_1  | 1.06096(15) | 0.47096(7)  | 0.93860(9)  | 0.0510(6) |
| C6_1  | 0.82119(18) | 0.49064(9)  | 0.70167(12) | 0.0216(6) |
| F6_1  | 1.07429(14) | 0.55246(7)  | 0.93243(9)  | 0.0464(5) |
| C7_1  | 0.90840(19) | 0.49036(9)  | 0.80096(12) | 0.0233(6) |
| F7_1  | 0.98355(13) | 0.59369(6)  | 0.84021(9)  | 0.0401(5) |
| C8_1  | 0.9597(2)   | 0.46977(10) | 0.84909(14) | 0.0294(6) |
| F8_1  | 0.70398(11) | 0.55606(5)  | 0.81046(8)  | 0.0286(4) |
| C9_1  | 1.0126(2)   | 0.49096(11) | 0.89367(14) | 0.0356(8) |
| F9_1  | 0.63565(13) | 0.62636(6)  | 0.85210(9)  | 0.0401(5) |
| C10_1 | 1.0193(2)   | 0.53276(10) | 0.89065(14) | 0.0327(7) |
| F10_1 | 0.71635(14) | 0.69843(6)  | 0.83098(10) | 0.0458(5) |
| C11_1 | 0.9713(2)   | 0.55380(10) | 0.84387(14) | 0.0295(7) |
| F11_1 | 0.86280(14) | 0.70061(6)  | 0.76736(11) | 0.0451(5) |
| C12_1 | 0.91287(19) | 0.53304(9)  | 0.79941(13) | 0.0240(6) |
| F12_1 | 0.93106(13) | 0.63060(6)  | 0.72790(10) | 0.0397(5) |
| C13_1 | 0.81967(19) | 0.59242(9)  | 0.77012(13) | 0.0243(6) |
| F13_1 | 0.69124(12) | 0.46716(5)  | 0.80321(7)  | 0.0274(4) |
| C14_1 | 0.74356(19) | 0.59168(9)  | 0.80121(13) | 0.0240(6) |
| F14_1 | 0.60596(13) | 0.39634(6)  | 0.82356(9)  | 0.0367(4) |
| C15_1 | 0.7087(2)   | 0.62729(10) | 0.82220(14) | 0.0290(6) |
| F15_1 | 0.68790(14) | 0.32431(6)  | 0.80261(10) | 0.0424(5) |
| C16_1 | 0.7497(2)   | 0.66388(10) | 0.81114(15) | 0.0338(7) |
| F16_1 | 0.84867(15) | 0.32336(6)  | 0.75604(10) | 0.0445(5) |
| F17_1 | 0.93072(13) | 0.39476(6)  | 0.73232(9)  | 0.0383(4) |
| C17_1 | 0.8244(2)   | 0.66508(10) | 0.77887(16) | 0.0331(7) |
| C18_1 | 0.8588(2)   | 0.62943(10) | 0.75861(15) | 0.0306(7) |
| C19_1 | 0.8124(2)   | 0.43152(9)  | 0.76835(13) | 0.0251(6) |
| C20_1 | 0.7295(2)   | 0.43172(9)  | 0.79163(12) | 0.0236(6) |
| C21_1 | 0.6866(2)   | 0.39572(9)  | 0.80278(13) | 0.0280(6) |
| C22_1 | 0.7285(2)   | 0.35939(9)  | 0.79185(14) | 0.0320(7) |
| C23_1 | 0.8107(2)   | 0.35889(9)  | 0.76840(15) | 0.0323(7) |
| C24_1 | 0.8524(2)   | 0.39494(10) | 0.75621(14) | 0.0295(6) |
| C2_1  | 0.79213(19) | 0.55419(9)  | 0.64738(14) | 0.0263(6) |

Table S 8 Atomic coordinates and  $U_{eq}$  [ $\text{\AA}^2$ ] for **4** (oDFB)

| Atom | x          | y           | z          | $U_{eq}$    |
|------|------------|-------------|------------|-------------|
| Al1  | 0.82071(4) | 0.57512(2)  | 0.58284(4) | 0.00903(17) |
| Al2  | 0.67562(4) | 0.74192(2)  | 0.41338(4) | 0.00846(17) |
| Al3  | 0.82060(4) | -0.09037(2) | 0.57989(3) | 0.00847(17) |
| Al4  | 0.82330(4) | 0.24313(2)  | 0.58740(3) | 0.00845(17) |
| Al5  | 0.68104(4) | 0.07705(2)  | 0.41653(3) | 0.00751(16) |

|      |             |             |             |             |
|------|-------------|-------------|-------------|-------------|
| Al6  | 0.32055(4)  | 0.59145(2)  | 0.58364(4)  | 0.00908(17) |
| O1_2 | 0.6672(6)   | 0.77096(10) | 0.4229(4)   | 0.019(2)    |
| C1_2 | 0.6396(3)   | 0.79076(12) | 0.4019(3)   | 0.0210(14)  |
| C2_2 | 0.5707(3)   | 0.79187(10) | 0.4042(2)   | 0.0212(12)  |
| F1_2 | 0.53406(15) | 0.77907(6)  | 0.36597(14) | 0.0294(8)   |
| F2_2 | 0.5482(6)   | 0.81326(15) | 0.3982(5)   | 0.0299(18)  |
| F3_2 | 0.56485(19) | 0.78376(8)  | 0.44925(17) | 0.0395(11)  |
| C3_2 | 0.6756(3)   | 0.81100(12) | 0.4343(3)   | 0.0435(19)  |
| F4_2 | 0.73700(19) | 0.80761(7)  | 0.4439(3)   | 0.066(2)    |
| F5_2 | 0.6626(3)   | 0.81309(8)  | 0.48000(19) | 0.0616(15)  |
| F6_2 | 0.6624(6)   | 0.83107(14) | 0.4079(4)   | 0.055(2)    |
| C4_2 | 0.6413(3)   | 0.79327(12) | 0.3439(3)   | 0.0327(15)  |
| F7_2 | 0.6976(2)   | 0.79912(9)  | 0.3410(2)   | 0.0573(15)  |
| F8_2 | 0.6014(3)   | 0.80904(10) | 0.3172(3)   | 0.0342(14)  |
| F9_2 | 0.6266(2)   | 0.77339(7)  | 0.31835(15) | 0.0410(11)  |
| O1_3 | 0.6687(14)  | 0.7706(2)   | 0.4264(9)   | 0.012(4)    |
| C1_3 | 0.6420(6)   | 0.7906(3)   | 0.4058(5)   | 0.019(3)    |
| C2_3 | 0.6253(6)   | 0.7905(2)   | 0.3446(5)   | 0.025(3)    |
| F1_3 | 0.5734(4)   | 0.77863(14) | 0.3233(3)   | 0.035(2)    |
| F2_3 | 0.6204(8)   | 0.8120(3)   | 0.3259(9)   | 0.041(4)    |
| F3_3 | 0.6709(5)   | 0.78078(16) | 0.3287(3)   | 0.032(2)    |
| C3_3 | 0.6887(6)   | 0.8103(3)   | 0.4270(5)   | 0.028(3)    |
| F4_3 | 0.7152(5)   | 0.80763(15) | 0.4782(3)   | 0.036(2)    |
| F5_3 | 0.7327(4)   | 0.81094(17) | 0.4008(5)   | 0.045(3)    |
| F6_3 | 0.6615(14)  | 0.8310(3)   | 0.4223(11)  | 0.052(4)    |
| C4_3 | 0.5806(6)   | 0.7942(2)   | 0.4219(5)   | 0.025(3)    |
| F7_3 | 0.5941(5)   | 0.79974(18) | 0.4731(3)   | 0.040(3)    |
| F8_3 | 0.5442(14)  | 0.8107(4)   | 0.3948(12)  | 0.028(3)    |
| F9_3 | 0.5473(4)   | 0.77482(15) | 0.4151(4)   | 0.031(2)    |
| O1_4 | 0.70015(11) | 0.72901(4)  | 0.47418(8)  | 0.0134(4)   |
| C1_4 | 0.69558(14) | 0.72875(6)  | 0.52388(12) | 0.0143(6)   |
| C2_4 | 0.73635(18) | 0.70873(6)  | 0.55357(14) | 0.0238(7)   |
| F1_4 | 0.79699(11) | 0.71444(5)  | 0.56427(10) | 0.0318(6)   |
| F2_4 | 0.72450(14) | 0.70393(5)  | 0.59938(9)  | 0.0378(6)   |
| F3_4 | 0.72727(13) | 0.69009(4)  | 0.52438(9)  | 0.0329(6)   |
| C3_4 | 0.62669(17) | 0.72511(7)  | 0.52475(13) | 0.0214(7)   |
| F4_4 | 0.58853(10) | 0.73735(4)  | 0.48722(9)  | 0.0257(5)   |
| F5_4 | 0.60969(12) | 0.70320(5)  | 0.51611(10) | 0.0323(6)   |
| F6_4 | 0.61665(12) | 0.73131(5)  | 0.57073(9)  | 0.0360(6)   |
| C4_4 | 0.71905(16) | 0.75211(6)  | 0.55247(13) | 0.0187(7)   |
| F7_4 | 0.67594(11) | 0.76850(4)  | 0.53887(9)  | 0.0251(5)   |
| F8_4 | 0.73398(12) | 0.75000(4)  | 0.60464(8)  | 0.0290(5)   |
| F9_4 | 0.76965(11) | 0.75936(4)  | 0.53999(9)  | 0.0271(5)   |
| O1_5 | 0.7318(5)   | 0.7360(3)   | 0.3817(6)   | 0.020(3)    |
| C1_5 | 0.7929(5)   | 0.73337(14) | 0.3841(3)   | 0.0171(16)  |
| C2_5 | 0.7960(5)   | 0.72482(16) | 0.3295(3)   | 0.0293(19)  |
| F1_5 | 0.7845(4)   | 0.70205(11) | 0.3243(3)   | 0.0497(18)  |
| F2_5 | 0.8527(5)   | 0.7279(2)   | 0.3222(5)   | 0.037(2)    |
| F3_5 | 0.7553(4)   | 0.73548(15) | 0.2908(3)   | 0.0383(17)  |
| C3_5 | 0.8263(5)   | 0.75697(16) | 0.3957(4)   | 0.0226(17)  |
| F4_5 | 0.8110(4)   | 0.76761(12) | 0.4355(3)   | 0.0310(15)  |
| F5_5 | 0.8096(7)   | 0.7708(2)   | 0.3542(4)   | 0.035(2)    |
| F6_5 | 0.8880(5)   | 0.75500(19) | 0.4092(6)   | 0.034(2)    |
| C4_5 | 0.8256(4)   | 0.71586(14) | 0.4271(3)   | 0.0331(17)  |
| F7_5 | 0.8398(2)   | 0.72577(12) | 0.4747(2)   | 0.0380(14)  |

|      |             |             |             |            |
|------|-------------|-------------|-------------|------------|
| F8_5 | 0.8791(3)   | 0.70814(16) | 0.4195(3)   | 0.054(2)   |
| F9_5 | 0.7887(3)   | 0.69799(10) | 0.4274(3)   | 0.0478(16) |
| O1_6 | 0.60376(11) | 0.73212(4)  | 0.37528(9)  | 0.0152(5)  |
| C1_6 | 0.57158(15) | 0.71552(6)  | 0.34478(12) | 0.0181(7)  |
| C2_6 | 0.59044(19) | 0.71333(9)  | 0.29264(16) | 0.0352(10) |
| F1_6 | 0.64323(13) | 0.70165(7)  | 0.29944(13) | 0.0584(10) |
| F2_6 | 0.54684(13) | 0.70238(6)  | 0.25477(11) | 0.0493(8)  |
| F3_6 | 0.59935(14) | 0.73379(6)  | 0.27457(10) | 0.0474(8)  |
| C3_6 | 0.50083(16) | 0.72182(7)  | 0.33215(14) | 0.0221(7)  |
| F4_6 | 0.48694(11) | 0.72993(5)  | 0.37368(10) | 0.0325(6)  |
| F5_6 | 0.48644(11) | 0.73786(4)  | 0.29461(9)  | 0.0292(5)  |
| F6_6 | 0.46378(11) | 0.70349(5)  | 0.31451(10) | 0.0314(6)  |
| C4_6 | 0.5828(2)   | 0.69191(7)  | 0.37334(18) | 0.0400(11) |
| F7_6 | 0.55337(16) | 0.69103(5)  | 0.41055(12) | 0.0522(9)  |
| F8_6 | 0.56290(15) | 0.67402(5)  | 0.34098(13) | 0.0548(9)  |
| F9_6 | 0.64284(14) | 0.68910(5)  | 0.39652(14) | 0.0557(10) |
| O1_7 | 0.79399(11) | 0.23289(4)  | 0.52438(9)  | 0.0134(4)  |
| C1_7 | 0.80577(15) | 0.22184(5)  | 0.48352(12) | 0.0138(6)  |
| C2_7 | 0.74205(18) | 0.21864(7)  | 0.44151(14) | 0.0240(8)  |
| F1_7 | 0.70787(12) | 0.20243(5)  | 0.45541(11) | 0.0350(6)  |
| F2_7 | 0.74756(13) | 0.21323(5)  | 0.39424(9)  | 0.0372(7)  |
| F3_7 | 0.70912(12) | 0.23819(5)  | 0.43645(9)  | 0.0344(6)  |
| C3_7 | 0.85043(19) | 0.23585(7)  | 0.45981(15) | 0.0261(8)  |
| F4_7 | 0.89722(12) | 0.24418(5)  | 0.49808(11) | 0.0349(6)  |
| F5_7 | 0.82087(15) | 0.25345(5)  | 0.43145(11) | 0.0427(7)  |
| F6_7 | 0.87493(15) | 0.22329(5)  | 0.42805(11) | 0.0414(7)  |
| C4_7 | 0.83462(17) | 0.19768(6)  | 0.50004(13) | 0.0182(7)  |
| F7_7 | 0.89592(11) | 0.19935(4)  | 0.52223(9)  | 0.0279(5)  |
| F8_7 | 0.82623(12) | 0.18361(4)  | 0.45883(8)  | 0.0265(5)  |
| F9_7 | 0.80982(12) | 0.18817(4)  | 0.53492(9)  | 0.0268(5)  |
| O1_8 | 0.88487(10) | 0.22611(4)  | 0.62113(9)  | 0.0136(4)  |
| C1_8 | 0.93793(14) | 0.22415(5)  | 0.66011(11) | 0.0130(6)  |
| C2_8 | 0.98937(16) | 0.24071(7)  | 0.65134(13) | 0.0216(7)  |
| F1_8 | 0.98089(11) | 0.26198(4)  | 0.66582(9)  | 0.0281(5)  |
| F2_8 | 1.04676(10) | 0.23419(5)  | 0.67872(10) | 0.0371(6)  |
| F3_8 | 0.98764(11) | 0.24134(5)  | 0.60092(9)  | 0.0339(6)  |
| C3_8 | 0.96065(19) | 0.19885(7)  | 0.66076(15) | 0.0273(8)  |
| F4_8 | 0.91326(14) | 0.18434(4)  | 0.65480(10) | 0.0400(7)  |
| F5_8 | 0.98646(13) | 0.19534(5)  | 0.62186(10) | 0.0439(8)  |
| F6_8 | 1.00334(13) | 0.19347(5)  | 0.70591(10) | 0.0386(7)  |
| C4_8 | 0.92720(15) | 0.22993(6)  | 0.71455(12) | 0.0142(6)  |
| F7_8 | 0.89690(11) | 0.21296(4)  | 0.73119(9)  | 0.0289(5)  |
| F8_8 | 0.98076(10) | 0.23322(4)  | 0.75182(8)  | 0.0202(4)  |
| F9_8 | 0.89285(10) | 0.24876(4)  | 0.71156(8)  | 0.0228(5)  |
| O1_9 | 0.8516(3)   | 0.27078(6)  | 0.5865(2)   | 0.0146(10) |
| C1_9 | 0.83694(19) | 0.29297(8)  | 0.57494(16) | 0.0153(8)  |
| C2_9 | 0.7761(2)   | 0.29547(8)  | 0.52872(19) | 0.0306(11) |
| F1_9 | 0.78751(18) | 0.29062(6)  | 0.48299(11) | 0.0458(9)  |
| F2_9 | 0.7517(2)   | 0.31653(7)  | 0.5253(2)   | 0.0443(13) |
| F3_9 | 0.73310(13) | 0.28071(5)  | 0.53468(14) | 0.0399(8)  |
| C3_9 | 0.8274(2)   | 0.30543(8)  | 0.62439(18) | 0.0248(10) |
| F4_9 | 0.87097(17) | 0.29921(5)  | 0.66701(10) | 0.0323(7)  |
| F5_9 | 0.77252(16) | 0.29958(6)  | 0.63205(15) | 0.0426(9)  |
| F6_9 | 0.8290(3)   | 0.32822(7)  | 0.6207(2)   | 0.0362(12) |
| C4_9 | 0.8917(2)   | 0.30473(8)  | 0.55888(19) | 0.0260(10) |

|       |             |            |             |            |
|-------|-------------|------------|-------------|------------|
| F7_9  | 0.94010(14) | 0.30812(5) | 0.60043(13) | 0.0343(7)  |
| F8_9  | 0.8754(2)   | 0.32515(6) | 0.53585(15) | 0.0427(10) |
| F9_9  | 0.91080(17) | 0.29161(5) | 0.52520(13) | 0.0388(8)  |
| O1_10 | 0.65042(11) | 0.10414(4) | 0.41825(9)  | 0.0153(5)  |
| C1_10 | 0.66356(16) | 0.12644(5) | 0.43086(13) | 0.0172(6)  |
| C2_10 | 0.67169(19) | 0.13957(6) | 0.38200(15) | 0.0242(8)  |
| F1_10 | 0.72768(13) | 0.13478(5) | 0.37483(12) | 0.0397(7)  |
| F2_10 | 0.66866(13) | 0.16233(4) | 0.38635(10) | 0.0331(6)  |
| F3_10 | 0.62895(13) | 0.13317(4) | 0.33906(9)  | 0.0307(5)  |
| C3_10 | 0.6080(2)   | 0.13693(6) | 0.44756(15) | 0.0258(8)  |
| F4_10 | 0.58948(15) | 0.12326(5) | 0.48059(11) | 0.0401(7)  |
| F5_10 | 0.55936(12) | 0.14056(5) | 0.40615(10) | 0.0351(6)  |
| F6_10 | 0.62325(16) | 0.15721(4) | 0.47186(12) | 0.0467(8)  |
| C4_10 | 0.7235(2)   | 0.12905(6) | 0.47729(15) | 0.0281(8)  |
| F7_10 | 0.71329(15) | 0.12316(5) | 0.52282(10) | 0.0427(7)  |
| F8_10 | 0.74574(15) | 0.15042(4) | 0.48213(12) | 0.0476(8)  |
| F9_10 | 0.76885(12) | 0.11506(4) | 0.47083(11) | 0.0367(6)  |
| O1_11 | 0.73959(11) | 0.07837(4) | 0.38544(10) | 0.0169(5)  |
| C1_11 | 0.79085(15) | 0.06909(6) | 0.37572(13) | 0.0189(7)  |
| C2_11 | 0.84010(17) | 0.06135(8) | 0.42675(15) | 0.0279(8)  |
| F1_11 | 0.82387(13) | 0.04164(5) | 0.44372(11) | 0.0365(6)  |
| F2_11 | 0.89688(11) | 0.05911(6) | 0.41979(11) | 0.0442(7)  |
| F3_11 | 0.84395(11) | 0.07677(5) | 0.46497(10) | 0.0354(6)  |
| C3_11 | 0.81976(19) | 0.08802(8) | 0.34819(17) | 0.0320(9)  |
| F4_11 | 0.77571(13) | 0.09850(6) | 0.31094(12) | 0.0439(7)  |
| F5_11 | 0.84838(13) | 0.10393(5) | 0.38263(13) | 0.0453(7)  |
| F6_11 | 0.86124(12) | 0.07956(6) | 0.32480(12) | 0.0442(7)  |
| C4_11 | 0.77260(17) | 0.04796(7) | 0.33895(15) | 0.0265(8)  |
| F7_11 | 0.74460(13) | 0.05444(6) | 0.28974(10) | 0.0404(7)  |
| F8_11 | 0.82178(12) | 0.03519(5) | 0.33681(11) | 0.0404(7)  |
| F9_11 | 0.73347(12) | 0.03452(5) | 0.35511(11) | 0.0356(6)  |
| O1_12 | 0.71292(11) | 0.06679(4) | 0.47924(9)  | 0.0145(5)  |
| C1_12 | 0.70259(15) | 0.05527(5) | 0.52027(12) | 0.0131(6)  |
| C2_12 | 0.76376(18) | 0.05571(6) | 0.56482(14) | 0.0229(7)  |
| F1_12 | 0.80751(12) | 0.04261(5) | 0.55491(10) | 0.0339(6)  |
| F2_12 | 0.75663(13) | 0.04901(5) | 0.61153(9)  | 0.0373(6)  |
| F3_12 | 0.78751(12) | 0.07707(4) | 0.57150(9)  | 0.0294(5)  |
| C3_12 | 0.64964(18) | 0.06639(7) | 0.53924(14) | 0.0247(8)  |
| F4_12 | 0.60325(11) | 0.07273(5) | 0.49826(10) | 0.0304(5)  |
| F5_12 | 0.66979(14) | 0.08530(5) | 0.56792(10) | 0.0367(6)  |
| F6_12 | 0.62626(13) | 0.05249(5) | 0.56917(11) | 0.0390(7)  |
| C4_12 | 0.68413(19) | 0.02983(6) | 0.50381(14) | 0.0247(8)  |
| F7_12 | 0.62477(12) | 0.02846(4) | 0.47702(10) | 0.0358(6)  |
| F8_12 | 0.69360(13) | 0.01598(4) | 0.54557(9)  | 0.0321(6)  |
| F9_12 | 0.71809(14) | 0.02185(4) | 0.47339(10) | 0.0360(6)  |
| O1_13 | 0.62124(11) | 0.05930(4) | 0.38328(9)  | 0.0144(5)  |
| C1_13 | 0.56861(14) | 0.05657(5) | 0.34440(12) | 0.0117(6)  |
| C2_13 | 0.51542(16) | 0.07261(7) | 0.35215(14) | 0.0220(7)  |
| F1_13 | 0.52252(11) | 0.09406(4) | 0.33696(9)  | 0.0270(5)  |
| F2_13 | 0.45883(11) | 0.06553(5) | 0.32461(10) | 0.0364(6)  |
| F3_13 | 0.51606(11) | 0.07343(5) | 0.40233(9)  | 0.0335(6)  |
| C3_13 | 0.54748(18) | 0.03122(6) | 0.34500(15) | 0.0265(8)  |
| F4_13 | 0.59596(13) | 0.01718(4) | 0.35095(11) | 0.0371(6)  |
| F5_13 | 0.52284(13) | 0.02751(5) | 0.38430(11) | 0.0434(7)  |
| F6_13 | 0.50484(13) | 0.02509(4) | 0.30050(10) | 0.0404(7)  |

|       |             |             |             |            |
|-------|-------------|-------------|-------------|------------|
| C4_13 | 0.57911(16) | 0.06197(6)  | 0.28989(13) | 0.0168(6)  |
| F7_13 | 0.61019(12) | 0.04514(4)  | 0.27428(9)  | 0.0304(5)  |
| F8_13 | 0.52485(10) | 0.06448(4)  | 0.25220(8)  | 0.0220(4)  |
| F9_13 | 0.61138(10) | 0.08123(4)  | 0.29147(8)  | 0.0228(5)  |
| O1_14 | 0.76378(11) | 0.24308(5)  | 0.61756(10) | 0.0184(5)  |
| C1_14 | 0.71360(15) | 0.23297(6)  | 0.62694(13) | 0.0198(7)  |
| C2_14 | 0.68082(19) | 0.25157(8)  | 0.65234(17) | 0.0334(9)  |
| F1_14 | 0.65085(13) | 0.26668(6)  | 0.61591(13) | 0.0478(8)  |
| F2_14 | 0.63938(12) | 0.24277(6)  | 0.67505(11) | 0.0431(7)  |
| F3_14 | 0.72226(14) | 0.26325(6)  | 0.68897(12) | 0.0445(7)  |
| C3_14 | 0.73390(17) | 0.21266(7)  | 0.66584(15) | 0.0262(8)  |
| F4_14 | 0.77574(11) | 0.19984(4)  | 0.65184(11) | 0.0334(6)  |
| F5_14 | 0.76006(12) | 0.22016(6)  | 0.71467(9)  | 0.0397(7)  |
| F6_14 | 0.68605(12) | 0.19915(5)  | 0.66775(11) | 0.0368(6)  |
| C4_14 | 0.66678(18) | 0.22397(8)  | 0.57573(15) | 0.0295(9)  |
| F7_14 | 0.68751(13) | 0.20434(5)  | 0.56048(10) | 0.0368(6)  |
| F8_14 | 0.61039(12) | 0.22014(6)  | 0.58194(11) | 0.0448(8)  |
| F9_14 | 0.66115(12) | 0.23904(5)  | 0.53694(10) | 0.0372(6)  |
| O1_15 | 0.34455(13) | 0.56332(4)  | 0.58709(11) | 0.0221(5)  |
| C1_15 | 0.33020(16) | 0.54118(6)  | 0.57442(13) | 0.0178(6)  |
| C2_15 | 0.3838(2)   | 0.52955(8)  | 0.55706(18) | 0.0407(11) |
| F1_15 | 0.43325(15) | 0.52543(6)  | 0.59837(13) | 0.0518(8)  |
| F2_15 | 0.36549(19) | 0.50922(6)  | 0.53413(14) | 0.0639(10) |
| F3_15 | 0.4037(2)   | 0.54236(7)  | 0.52444(16) | 0.0727(12) |
| C3_15 | 0.2695(2)   | 0.53923(7)  | 0.52921(19) | 0.0419(12) |
| F4_15 | 0.22807(14) | 0.55476(5)  | 0.53363(16) | 0.0613(10) |
| F5_15 | 0.2803(2)   | 0.54435(6)  | 0.48242(12) | 0.0658(11) |
| F6_15 | 0.24404(16) | 0.51868(5)  | 0.52424(15) | 0.0677(12) |
| C4_15 | 0.3228(2)   | 0.52857(8)  | 0.62393(18) | 0.0368(10) |
| F7_15 | 0.26756(19) | 0.53479(7)  | 0.63244(18) | 0.0756(12) |
| F8_15 | 0.32206(15) | 0.50569(5)  | 0.61856(13) | 0.0538(9)  |
| F9_15 | 0.36640(17) | 0.53414(6)  | 0.66572(11) | 0.0521(8)  |
| O1_16 | 0.26164(15) | 0.59319(6)  | 0.61437(14) | 0.0178(7)  |
| C1_16 | 0.2112(2)   | 0.60372(10) | 0.6223(2)   | 0.0178(10) |
| C2_16 | 0.2314(3)   | 0.62412(11) | 0.6612(2)   | 0.0258(13) |
| F1_16 | 0.2554(2)   | 0.61663(9)  | 0.71014(15) | 0.0387(10) |
| F2_16 | 0.1842(3)   | 0.63843(11) | 0.6620(3)   | 0.0352(14) |
| F3_16 | 0.2748(2)   | 0.63652(11) | 0.6477(2)   | 0.0319(12) |
| C3_16 | 0.1665(3)   | 0.61288(10) | 0.5708(2)   | 0.0288(12) |
| F4_16 | 0.15982(19) | 0.59757(8)  | 0.53165(14) | 0.0368(9)  |
| F5_16 | 0.1878(2)   | 0.63212(7)  | 0.55489(14) | 0.0387(9)  |
| F6_16 | 0.1090(2)   | 0.61731(10) | 0.57545(18) | 0.0444(11) |
| C4_16 | 0.1759(3)   | 0.58561(11) | 0.6471(3)   | 0.0317(13) |
| F7_16 | 0.1454(3)   | 0.57060(14) | 0.6110(3)   | 0.0493(14) |
| F8_16 | 0.1352(2)   | 0.59515(9)  | 0.6693(2)   | 0.0436(12) |
| F9_16 | 0.21693(19) | 0.57388(7)  | 0.68439(16) | 0.0431(10) |
| O1_17 | 0.29309(18) | 0.60108(6)  | 0.52095(12) | 0.0131(7)  |
| C1_17 | 0.3060(2)   | 0.61122(10) | 0.4795(2)   | 0.0130(10) |
| C2_17 | 0.3379(4)   | 0.63509(13) | 0.4939(3)   | 0.0255(16) |
| F1_17 | 0.3995(3)   | 0.63304(16) | 0.5101(3)   | 0.062(2)   |
| F2_17 | 0.3244(6)   | 0.64931(18) | 0.4530(4)   | 0.0247(17) |
| F3_17 | 0.3187(4)   | 0.64454(13) | 0.5321(3)   | 0.0440(19) |
| C3_17 | 0.2436(3)   | 0.61437(10) | 0.4365(2)   | 0.0244(12) |
| F4_17 | 0.2096(2)   | 0.59516(8)  | 0.43201(16) | 0.0343(11) |
| F5_17 | 0.20929(15) | 0.63120(6)  | 0.44883(16) | 0.0341(8)  |

|       |             |             |             |            |
|-------|-------------|-------------|-------------|------------|
| F6_17 | 0.2508(2)   | 0.61906(7)  | 0.38913(12) | 0.0374(10) |
| C4_17 | 0.3512(3)   | 0.59659(9)  | 0.4579(2)   | 0.0260(10) |
| F7_17 | 0.3216(2)   | 0.57856(7)  | 0.43019(18) | 0.0427(11) |
| F8_17 | 0.37731(19) | 0.60837(6)  | 0.42574(15) | 0.0382(10) |
| F9_17 | 0.39721(16) | 0.58864(6)  | 0.49746(15) | 0.0359(9)  |
| O1_18 | 0.89378(12) | 0.56471(4)  | 0.61766(10) | 0.0111(5)  |
| C1_18 | 0.92736(16) | 0.54762(6)  | 0.64656(14) | 0.0137(7)  |
| C2_18 | 0.99668(17) | 0.55525(7)  | 0.66140(15) | 0.0186(7)  |
| F1_18 | 1.00885(11) | 0.57034(5)  | 0.70096(10) | 0.0251(6)  |
| F2_18 | 1.03572(11) | 0.53726(5)  | 0.67705(10) | 0.0258(6)  |
| F3_18 | 1.01094(11) | 0.56521(5)  | 0.62149(10) | 0.0230(5)  |
| C3_18 | 0.9201(2)   | 0.52494(7)  | 0.61382(16) | 0.0234(8)  |
| F4_18 | 0.85951(14) | 0.52128(5)  | 0.58897(13) | 0.0319(7)  |
| F5_18 | 0.95117(14) | 0.52627(5)  | 0.57791(11) | 0.0322(6)  |
| F6_18 | 0.94025(14) | 0.50652(4)  | 0.64431(12) | 0.0342(7)  |
| C4_18 | 0.90759(19) | 0.54320(8)  | 0.69733(15) | 0.0248(9)  |
| F7_18 | 0.85513(12) | 0.53060(5)  | 0.68698(12) | 0.0358(7)  |
| F8_18 | 0.95089(13) | 0.53189(5)  | 0.73400(10) | 0.0340(7)  |
| F9_18 | 0.89585(14) | 0.56271(6)  | 0.71865(10) | 0.0334(7)  |
| O1_19 | 0.82871(12) | 0.60414(4)  | 0.57417(11) | 0.0215(5)  |
| C1_19 | 0.85606(17) | 0.62399(6)  | 0.59443(15) | 0.0223(7)  |
| C2_19 | 0.92419(18) | 0.62509(7)  | 0.58979(17) | 0.0282(8)  |
| F1_19 | 0.96251(11) | 0.61247(4)  | 0.62786(11) | 0.0346(6)  |
| F2_19 | 0.94675(12) | 0.64662(4)  | 0.59572(11) | 0.0349(6)  |
| F3_19 | 0.92743(13) | 0.61739(5)  | 0.54451(11) | 0.0381(6)  |
| C3_19 | 0.8182(2)   | 0.64436(7)  | 0.56417(19) | 0.0373(10) |
| F4_19 | 0.75709(13) | 0.64061(5)  | 0.55505(16) | 0.0567(10) |
| F5_19 | 0.82974(17) | 0.64671(5)  | 0.51722(13) | 0.0558(9)  |
| F6_19 | 0.83157(14) | 0.66427(4)  | 0.59047(14) | 0.0548(10) |
| C4_19 | 0.8571(2)   | 0.62616(7)  | 0.65357(17) | 0.0303(9)  |
| F7_19 | 0.80104(13) | 0.63135(6)  | 0.65825(13) | 0.0465(8)  |
| F8_19 | 0.89622(13) | 0.64198(5)  | 0.67890(11) | 0.0389(6)  |
| F9_19 | 0.87290(15) | 0.60603(5)  | 0.67815(10) | 0.0393(6)  |
| O1_20 | 0.7716(4)   | 0.5683(3)   | 0.6208(4)   | 0.0151(19) |
| C1_20 | 0.7116(3)   | 0.56477(11) | 0.6209(3)   | 0.0152(13) |
| C2_20 | 0.6848(3)   | 0.54271(12) | 0.5902(3)   | 0.0310(15) |
| F1_20 | 0.6661(3)   | 0.54661(11) | 0.5384(2)   | 0.0441(14) |
| F2_20 | 0.6353(2)   | 0.53452(9)  | 0.6037(2)   | 0.0400(13) |
| F3_20 | 0.7276(2)   | 0.52622(9)  | 0.5983(3)   | 0.0453(15) |
| C3_20 | 0.7111(4)   | 0.56221(13) | 0.6794(3)   | 0.0236(15) |
| F4_20 | 0.7484(4)   | 0.57755(10) | 0.7094(3)   | 0.0334(14) |
| F5_20 | 0.7313(2)   | 0.54119(9)  | 0.6979(2)   | 0.0374(12) |
| F6_20 | 0.6535(4)   | 0.5650(2)   | 0.6854(4)   | 0.035(2)   |
| C4_20 | 0.6703(4)   | 0.58557(13) | 0.5968(3)   | 0.0224(14) |
| F7_20 | 0.6805(5)   | 0.60363(15) | 0.6293(3)   | 0.0345(16) |
| F8_20 | 0.6093(4)   | 0.58081(13) | 0.5847(4)   | 0.0310(17) |
| F9_20 | 0.6827(5)   | 0.59264(12) | 0.5523(3)   | 0.0352(18) |
| O1_21 | 0.79349(18) | 0.56340(6)  | 0.52114(11) | 0.0146(7)  |
| C1_21 | 0.79570(17) | 0.56266(6)  | 0.47108(14) | 0.0153(7)  |
| C2_21 | 0.8601(2)   | 0.55641(9)  | 0.46625(18) | 0.0318(11) |
| F1_21 | 0.8730(2)   | 0.53428(6)  | 0.47476(13) | 0.0501(11) |
| F2_21 | 0.8686(2)   | 0.56240(11) | 0.41949(16) | 0.0507(11) |
| F3_21 | 0.90410(15) | 0.56760(6)  | 0.50345(15) | 0.0355(8)  |
| C3_21 | 0.77604(18) | 0.58649(7)  | 0.44403(15) | 0.0184(7)  |
| F4_21 | 0.72836(12) | 0.59544(5)  | 0.45890(11) | 0.0288(6)  |

|       |             |             |             |            |
|-------|-------------|-------------|-------------|------------|
| F5_21 | 0.82251(12) | 0.60141(4)  | 0.45618(10) | 0.0259(6)  |
| F6_21 | 0.75776(14) | 0.58450(5)  | 0.39149(10) | 0.0278(6)  |
| C4_21 | 0.7468(2)   | 0.54468(8)  | 0.44259(16) | 0.0338(11) |
| F7_21 | 0.68941(14) | 0.55204(6)  | 0.43494(12) | 0.0468(9)  |
| F8_21 | 0.7541(3)   | 0.53918(9)  | 0.39475(13) | 0.0622(14) |
| F9_21 | 0.7536(2)   | 0.52523(5)  | 0.47053(13) | 0.0510(11) |
| O1_22 | 0.38173(13) | 0.60804(4)  | 0.61874(10) | 0.0244(6)  |
| C1_22 | 0.43435(15) | 0.61016(6)  | 0.65708(12) | 0.0161(6)  |
| C2_22 | 0.48586(19) | 0.59371(8)  | 0.64747(16) | 0.0301(9)  |
| F1_22 | 0.47794(12) | 0.57233(4)  | 0.66197(10) | 0.0336(6)  |
| F2_22 | 0.54333(13) | 0.60030(7)  | 0.67415(13) | 0.0548(9)  |
| F3_22 | 0.48367(16) | 0.59318(6)  | 0.59693(11) | 0.0520(8)  |
| C3_22 | 0.4571(2)   | 0.63530(7)  | 0.65741(16) | 0.0348(10) |
| F4_22 | 0.40963(16) | 0.64979(4)  | 0.65282(12) | 0.0523(9)  |
| F5_22 | 0.48204(18) | 0.63908(6)  | 0.61792(12) | 0.0616(10) |
| F6_22 | 0.50038(15) | 0.64069(5)  | 0.70228(11) | 0.0469(8)  |
| C4_22 | 0.42443(17) | 0.60425(7)  | 0.71143(14) | 0.0217(7)  |
| F7_22 | 0.39556(13) | 0.62124(5)  | 0.72879(11) | 0.0393(6)  |
| F8_22 | 0.47895(11) | 0.60072(4)  | 0.74832(9)  | 0.0284(5)  |
| F9_22 | 0.39106(12) | 0.58522(4)  | 0.70891(9)  | 0.0310(5)  |
| O1_23 | 0.89188(11) | -0.09920(4) | 0.61973(9)  | 0.0142(4)  |
| C1_23 | 0.92414(15) | -0.11515(6) | 0.65315(12) | 0.0171(6)  |
| C2_23 | 0.90695(18) | -0.11447(8) | 0.70617(14) | 0.0302(9)  |
| F1_23 | 0.85307(11) | -0.12545(5) | 0.70259(11) | 0.0398(7)  |
| F2_23 | 0.95004(12) | -0.12476(6) | 0.74528(9)  | 0.0407(7)  |
| F3_23 | 0.89996(13) | -0.09290(5) | 0.72010(9)  | 0.0372(6)  |
| C3_23 | 0.99480(16) | -0.10984(7) | 0.66344(13) | 0.0212(7)  |
| F4_23 | 1.00755(10) | -0.10357(5) | 0.61970(9)  | 0.0268(5)  |
| F5_23 | 1.01172(11) | -0.09269(5) | 0.69782(9)  | 0.0313(6)  |
| F6_23 | 1.03065(11) | -0.12801(5) | 0.68322(9)  | 0.0300(5)  |
| C4_23 | 0.91030(17) | -0.13956(6) | 0.62881(15) | 0.0235(7)  |
| F7_23 | 0.93734(12) | -0.14253(4) | 0.59056(10) | 0.0312(5)  |
| F8_23 | 0.93034(13) | -0.15637(4) | 0.66378(11) | 0.0358(6)  |
| F9_23 | 0.84908(11) | -0.14246(4) | 0.60826(11) | 0.0326(6)  |
| O1_24 | 0.79711(10) | -0.10483(4) | 0.52054(8)  | 0.0111(4)  |
| C1_24 | 0.80317(14) | -0.10595(5) | 0.47137(12) | 0.0126(6)  |
| C2_24 | 0.78007(16) | -0.08332(6) | 0.44051(13) | 0.0196(7)  |
| F1_24 | 0.82352(11) | -0.06709(4) | 0.45188(9)  | 0.0259(5)  |
| F2_24 | 0.76543(12) | -0.08651(4) | 0.38807(8)  | 0.0292(5)  |
| F3_24 | 0.72940(10) | -0.07534(4) | 0.45166(9)  | 0.0253(5)  |
| C3_24 | 0.76201(17) | -0.12627(6) | 0.44297(14) | 0.0224(7)  |
| F4_24 | 0.76999(12) | -0.14453(4) | 0.47378(9)  | 0.0310(5)  |
| F5_24 | 0.70142(10) | -0.12055(4) | 0.43102(9)  | 0.0264(5)  |
| F6_24 | 0.77452(13) | -0.13224(5) | 0.39806(9)  | 0.0358(6)  |
| C4_24 | 0.87187(16) | -0.11013(6) | 0.47156(13) | 0.0203(7)  |
| F7_24 | 0.88823(11) | -0.13195(4) | 0.48210(10) | 0.0298(5)  |
| F8_24 | 0.88302(12) | -0.10501(5) | 0.42568(9)  | 0.0318(6)  |
| F9_24 | 0.90949(10) | -0.09732(4) | 0.50836(8)  | 0.0237(5)  |
| O1_25 | 0.76556(11) | -0.09531(4) | 0.61336(9)  | 0.0157(5)  |
| C1_25 | 0.70500(15) | -0.09788(6) | 0.61142(14) | 0.0188(7)  |
| C2_25 | 0.70098(19) | -0.10453(9) | 0.66701(17) | 0.0386(11) |
| F1_25 | 0.71485(18) | -0.12675(7) | 0.67570(18) | 0.0798(14) |
| F2_25 | 0.64396(12) | -0.10107(6) | 0.67327(11) | 0.0456(8)  |
| F3_25 | 0.74068(13) | -0.09273(8) | 0.70311(11) | 0.0637(11) |
| C3_25 | 0.66985(18) | -0.07472(8) | 0.59592(17) | 0.0317(9)  |

|       |             |              |             |            |
|-------|-------------|--------------|-------------|------------|
| F4_25 | 0.68484(13) | -0.06522(6)  | 0.55545(13) | 0.0560(10) |
| F5_25 | 0.68463(15) | -0.05988(5)  | 0.63564(15) | 0.0528(8)  |
| F6_25 | 0.60756(12) | -0.07750(6)  | 0.58212(12) | 0.0500(9)  |
| C4_25 | 0.6722(2)   | -0.11613(9)  | 0.5706(2)   | 0.0488(13) |
| F7_25 | 0.65790(15) | -0.10746(8)  | 0.52148(13) | 0.0735(13) |
| F8_25 | 0.61940(16) | -0.12378(7)  | 0.57969(19) | 0.0812(15) |
| F9_25 | 0.70887(18) | -0.13389(6)  | 0.5718(2)   | 0.0816(15) |
| O1_26 | 0.8282(3)   | -0.06193(6)  | 0.5630(2)   | 0.0153(9)  |
| C1_26 | 0.8544(2)   | -0.04151(8)  | 0.58078(19) | 0.0200(9)  |
| C2_26 | 0.8259(3)   | -0.02304(8)  | 0.5383(2)   | 0.0435(14) |
| F1_26 | 0.8500(3)   | -0.02426(7)  | 0.49827(15) | 0.0662(14) |
| F2_26 | 0.8365(4)   | -0.00188(9)  | 0.5588(4)   | 0.0722(17) |
| F3_26 | 0.7638(2)   | -0.02608(10) | 0.5222(2)   | 0.0698(18) |
| C3_26 | 0.8418(3)   | -0.03483(10) | 0.6334(2)   | 0.0467(15) |
| F4_26 | 0.8518(3)   | -0.05361(7)  | 0.66593(14) | 0.0556(12) |
| F5_26 | 0.7842(2)   | -0.02819(8)  | 0.6268(2)   | 0.0744(17) |
| F6_26 | 0.8819(3)   | -0.01884(9)  | 0.6604(3)   | 0.0653(17) |
| C4_26 | 0.9265(2)   | -0.04221(8)  | 0.5882(2)   | 0.0296(11) |
| F7_26 | 0.95570(16) | -0.05309(6)  | 0.63181(16) | 0.0512(11) |
| F8_26 | 0.9513(3)   | -0.02104(10) | 0.5922(3)   | 0.0382(11) |
| F9_26 | 0.9386(2)   | -0.05264(7)  | 0.5476(2)   | 0.0528(12) |
| C1_27 | 1.08995(18) | 0.48832(7)   | 0.62419(15) | 0.0249(8)  |
| C2_27 | 1.07767(16) | 0.47101(7)   | 0.65547(15) | 0.0244(8)  |
| C3_27 | 1.12051(18) | 0.46403(7)   | 0.70072(16) | 0.0269(8)  |
| H3_27 | 1.111031    | 0.452079     | 0.721736    | 0.032      |
| C4_27 | 1.17752(19) | 0.47481(9)   | 0.71483(16) | 0.0333(10) |
| H4_27 | 1.207990    | 0.470284     | 0.745997    | 0.040      |
| C5_27 | 1.1908(2)   | 0.49217(10)  | 0.68398(19) | 0.0467(13) |
| H5_27 | 1.230360    | 0.499500     | 0.694251    | 0.056      |
| C6_27 | 1.1474(2)   | 0.49903(8)   | 0.63837(18) | 0.0382(10) |
| H6_27 | 1.156841    | 0.510906     | 0.617170    | 0.046      |
| F1_27 | 1.04638(13) | 0.49377(5)   | 0.57953(11) | 0.0431(7)  |
| F2_27 | 1.02166(13) | 0.46043(6)   | 0.63920(11) | 0.0492(9)  |
| C1_28 | 1.09235(17) | 0.82518(7)   | 0.62918(15) | 0.0238(8)  |
| C2_28 | 1.07547(16) | 0.80834(7)   | 0.65916(14) | 0.0234(8)  |
| C3_28 | 1.11805(17) | 0.79902(7)   | 0.70205(14) | 0.0225(7)  |
| H3_28 | 1.105934    | 0.787408     | 0.722483    | 0.027      |
| C4_28 | 1.17882(17) | 0.80690(7)   | 0.71483(15) | 0.0255(8)  |
| H4_28 | 1.208927    | 0.800673     | 0.744316    | 0.031      |
| C5_28 | 1.19594(19) | 0.82382(8)   | 0.68483(16) | 0.0317(9)  |
| H5_28 | 1.237944    | 0.828998     | 0.693658    | 0.038      |
| C6_28 | 1.15238(18) | 0.83335(7)   | 0.64187(15) | 0.0248(8)  |
| H6_28 | 1.163909    | 0.845239     | 0.621778    | 0.030      |
| F1_28 | 1.04916(13) | 0.83323(6)   | 0.58675(11) | 0.0471(8)  |
| F2_28 | 1.01567(12) | 0.80074(6)   | 0.64469(11) | 0.0504(9)  |
| C1_29 | 0.41783(18) | 0.97471(7)   | 0.33865(15) | 0.0270(8)  |
| C2_29 | 0.3982(2)   | 0.99087(7)   | 0.36862(16) | 0.0312(9)  |
| C3_29 | 0.3375(2)   | 0.99835(8)   | 0.35366(19) | 0.0381(10) |
| H3_29 | 0.323735    | 1.009723     | 0.373693    | 0.046      |
| C4_29 | 0.2967(2)   | 0.98920(8)   | 0.30921(18) | 0.0382(11) |
| H4_29 | 0.254459    | 0.994174     | 0.298998    | 0.046      |
| C5_29 | 0.31644(19) | 0.97291(8)   | 0.27947(16) | 0.0317(9)  |
| H5_29 | 0.287980    | 0.966652     | 0.249042    | 0.038      |
| C6_29 | 0.37781(18) | 0.96577(7)   | 0.29417(15) | 0.0244(8)  |
| H6_29 | 0.392120    | 0.954762     | 0.273636    | 0.029      |



|        |             |             |             |            |
|--------|-------------|-------------|-------------|------------|
| F1_29  | 0.47777(13) | 0.96752(7)  | 0.35396(12) | 0.0599(11) |
| F2_29  | 0.43995(17) | 0.99796(7)  | 0.41295(12) | 0.0592(10) |
| C1_30  | 0.41942(17) | 0.63973(7)  | 0.33908(15) | 0.0239(8)  |
| C2_30  | 0.40464(18) | 0.65750(7)  | 0.36800(15) | 0.0263(8)  |
| C3_30  | 0.34663(19) | 0.66747(7)  | 0.35302(15) | 0.0268(8)  |
| H3_30  | 0.336599    | 0.679995    | 0.372229    | 0.032      |
| C4_30  | 0.30289(19) | 0.65879(7)  | 0.30900(16) | 0.0280(8)  |
| H4_30  | 0.261976    | 0.665046    | 0.298913    | 0.034      |
| C5_30  | 0.31831(17) | 0.64114(7)  | 0.27973(15) | 0.0246(8)  |
| H5_30  | 0.288230    | 0.635538    | 0.249446    | 0.030      |
| C6_30  | 0.37749(17) | 0.63165(7)  | 0.29458(14) | 0.0225(7)  |
| H6_30  | 0.388786    | 0.619783    | 0.274322    | 0.027      |
| F1_30  | 0.47692(12) | 0.63019(6)  | 0.35556(12) | 0.0511(9)  |
| F2_30  | 0.44792(13) | 0.66409(6)  | 0.41178(11) | 0.0475(8)  |
| C1_31  | 0.91723(16) | -0.13820(6) | 0.34790(14) | 0.0181(7)  |
| C2_31  | 0.91906(16) | -0.15639(6) | 0.38142(13) | 0.0173(6)  |
| C3_31  | 0.87203(18) | -0.17235(6) | 0.37121(15) | 0.0243(8)  |
| H3_31  | 0.873745    | -0.185030   | 0.394184    | 0.029      |
| C4_31  | 0.82223(18) | -0.16977(7) | 0.32717(15) | 0.0264(8)  |
| H4_31  | 0.789217    | -0.180654   | 0.319788    | 0.032      |
| C5_31  | 0.82030(17) | -0.15125(7) | 0.29356(15) | 0.0246(8)  |
| H5_31  | 0.785914    | -0.149564   | 0.263250    | 0.029      |
| C6_31  | 0.86791(18) | -0.13530(7) | 0.30386(14) | 0.0250(8)  |
| H6_31  | 0.866629    | -0.122599   | 0.281036    | 0.030      |
| F1_31  | 0.96457(11) | -0.12276(4) | 0.35992(10) | 0.0302(5)  |
| F2_31  | 0.96792(11) | -0.15810(4) | 0.42464(9)  | 0.0247(5)  |
| N1_32  | 0.54816(11) | 0.90159(4)  | 0.38724(10) | 0.0087(5)  |
| F1_32  | 0.50458(10) | 0.91015(4)  | 0.47680(8)  | 0.0183(4)  |
| C2_32  | 0.53371(15) | 0.92650(6)  | 0.45770(12) | 0.0128(6)  |
| N2_32  | 0.61528(12) | 0.93620(5)  | 0.35518(10) | 0.0092(5)  |
| F2_32  | 0.51637(10) | 0.95171(4)  | 0.52099(8)  | 0.0202(4)  |
| C3_32  | 0.54076(15) | 0.94771(6)  | 0.48175(13) | 0.0142(6)  |
| F3_32  | 0.58392(12) | 0.98453(4)  | 0.49149(9)  | 0.0241(5)  |
| C4_32  | 0.57577(16) | 0.96468(6)  | 0.46647(13) | 0.0152(6)  |
| F4_32  | 0.63671(10) | 0.97742(3)  | 0.41357(8)  | 0.0176(4)  |
| C5_32  | 0.60200(15) | 0.96080(5)  | 0.42595(12) | 0.0116(6)  |
| F5_32  | 0.69152(10) | 0.92456(4)  | 0.29093(8)  | 0.0177(4)  |
| C6_32  | 0.59304(14) | 0.93987(5)  | 0.39878(11) | 0.0083(5)  |
| F6_32  | 0.68797(11) | 0.88268(4)  | 0.24930(9)  | 0.0219(5)  |
| C7_32  | 0.61795(14) | 0.91394(5)  | 0.33682(11) | 0.0084(5)  |
| F7_32  | 0.61718(11) | 0.84951(3)  | 0.27444(8)  | 0.0204(4)  |
| C8_32  | 0.65373(15) | 0.90888(5)  | 0.30258(12) | 0.0118(6)  |
| F8_32  | 0.55013(10) | 0.85708(3)  | 0.34125(9)  | 0.0185(4)  |
| C9_32  | 0.65337(16) | 0.88725(6)  | 0.28155(13) | 0.0146(6)  |
| F9_32  | 0.55522(9)  | 0.86179(4)  | 0.44818(8)  | 0.0181(4)  |
| C10_32 | 0.61699(16) | 0.87016(6)  | 0.29483(13) | 0.0141(6)  |
| F10_32 | 0.45135(10) | 0.83641(4)  | 0.44590(9)  | 0.0225(5)  |
| C11_32 | 0.58278(15) | 0.87446(5)  | 0.32967(12) | 0.0122(6)  |
| F11_32 | 0.33926(10) | 0.85025(4)  | 0.38680(9)  | 0.0234(5)  |
| C12_32 | 0.58240(14) | 0.89642(5)  | 0.35191(11) | 0.0094(5)  |
| F12_32 | 0.32786(9)  | 0.88920(4)  | 0.32749(9)  | 0.0238(5)  |
| C13_32 | 0.49422(14) | 0.88806(5)  | 0.38809(12) | 0.0095(5)  |
| F13_32 | 0.43082(9)  | 0.91448(4)  | 0.33037(8)  | 0.0169(4)  |
| C14_32 | 0.43599(14) | 0.89510(6)  | 0.35806(12) | 0.0111(6)  |
| F14_32 | 0.72296(9)  | 0.96294(4)  | 0.36503(8)  | 0.0194(4)  |

|        |             |            |             |           |
|--------|-------------|------------|-------------|-----------|
| C15_32 | 0.38319(15) | 0.88244(6) | 0.35705(13) | 0.0148(6) |
| F15_32 | 0.72936(12) | 0.99527(4) | 0.29321(10) | 0.0303(6) |
| C16_32 | 0.38903(16) | 0.86264(6) | 0.38697(13) | 0.0161(6) |
| F16_32 | 0.62829(15) | 1.00425(4) | 0.21262(10) | 0.0382(7) |
| C17_32 | 0.44679(16) | 0.85556(6) | 0.41773(13) | 0.0149(6) |
| F17_32 | 0.52071(14) | 0.98062(5) | 0.20192(10) | 0.0400(7) |
| C18_32 | 0.49951(14) | 0.86821(6) | 0.41858(12) | 0.0121(6) |
| F18_32 | 0.51578(10) | 0.94691(4) | 0.27221(8)  | 0.0213(4) |
| C19_32 | 0.61891(15) | 0.95485(5) | 0.32047(12) | 0.0107(6) |
| C20_32 | 0.67359(16) | 0.96749(6) | 0.32564(13) | 0.0150(6) |
| C21_32 | 0.67691(19) | 0.98394(6) | 0.28908(14) | 0.0197(7) |
| C22_32 | 0.6250(2)   | 0.98829(6) | 0.24783(15) | 0.0246(8) |
| C23_32 | 0.57003(19) | 0.97622(7) | 0.24214(14) | 0.0229(8) |
| C24_32 | 0.56735(16) | 0.95939(6) | 0.27834(13) | 0.0153(6) |
| C1_32  | 0.55843(14) | 0.92209(5) | 0.41502(12) | 0.0086(5) |
| N1_33  | 0.95577(12) | 0.39950(4) | 0.60603(10) | 0.0094(5) |
| F1_33  | 0.96365(10) | 0.35414(4) | 0.64907(9)  | 0.0203(4) |
| C2_33  | 0.93114(15) | 0.37040(6) | 0.66467(12) | 0.0133(6) |
| N2_33  | 0.88696(12) | 0.43166(5) | 0.64383(10) | 0.0105(5) |
| F2_33  | 0.90783(10) | 0.34371(4) | 0.72226(8)  | 0.0203(4) |
| C3_33  | 0.90182(16) | 0.36462(6) | 0.70212(12) | 0.0138(6) |
| F3_33  | 0.83335(11) | 0.37399(4) | 0.75207(9)  | 0.0227(5) |
| C4_33  | 0.86368(16) | 0.38036(6) | 0.71822(13) | 0.0156(6) |
| F4_33  | 0.81795(10) | 0.41661(4) | 0.71161(9)  | 0.0214(4) |
| C5_33  | 0.85743(15) | 0.40217(6) | 0.69801(13) | 0.0145(6) |
| F5_33  | 0.85493(10) | 0.47308(4) | 0.58642(8)  | 0.0187(4) |
| C6_33  | 0.88991(14) | 0.40921(6) | 0.66184(12) | 0.0109(6) |
| F6_33  | 0.89808(10) | 0.48246(4) | 0.50441(8)  | 0.0207(4) |
| C7_33  | 0.90466(14) | 0.43655(6) | 0.59844(12) | 0.0105(6) |
| F7_33  | 0.96433(11) | 0.45115(4) | 0.46797(8)  | 0.0224(5) |
| C8_33  | 0.89031(15) | 0.45753(5) | 0.57179(12) | 0.0119(6) |
| F8_33  | 0.98939(10) | 0.41004(4) | 0.51329(8)  | 0.0216(5) |
| C9_33  | 0.91183(15) | 0.46250(6) | 0.52906(13) | 0.0135(6) |
| F9_33  | 0.95476(9)  | 0.36345(4) | 0.53556(9)  | 0.0218(5) |
| C10_33 | 0.94655(16) | 0.44627(6) | 0.51046(13) | 0.0163(6) |
| F10_33 | 1.05999(11) | 0.33934(4) | 0.53753(9)  | 0.0278(5) |
| C11_33 | 0.95940(15) | 0.42529(6) | 0.53450(13) | 0.0131(6) |
| F11_33 | 1.16839(10) | 0.35037(4) | 0.60755(10) | 0.0270(5) |
| C12_33 | 0.93995(14) | 0.42014(5) | 0.57936(12) | 0.0097(5) |
| F12_33 | 1.17472(10) | 0.38624(4) | 0.67475(9)  | 0.0255(5) |
| C13_33 | 1.01131(14) | 0.38731(5) | 0.60358(12) | 0.0115(6) |
| F13_33 | 1.07002(10) | 0.41091(4) | 0.67107(8)  | 0.0186(4) |
| C14_33 | 1.06774(15) | 0.39321(6) | 0.63867(12) | 0.0119(6) |
| F14_33 | 0.77507(9)  | 0.45459(4) | 0.63472(8)  | 0.0214(4) |
| C15_33 | 1.12102(15) | 0.38084(6) | 0.64019(13) | 0.0152(6) |
| F15_33 | 0.76453(11) | 0.48896(4) | 0.70177(10) | 0.0265(5) |
| C16_33 | 1.11784(15) | 0.36256(6) | 0.60617(14) | 0.0168(6) |
| F16_33 | 0.86540(12) | 0.50131(4) | 0.78027(8)  | 0.0253(5) |
| C17_33 | 1.06203(17) | 0.35675(6) | 0.57002(14) | 0.0180(7) |
| F17_33 | 0.97595(12) | 0.47982(4) | 0.79234(9)  | 0.0282(5) |
| C18_33 | 1.00885(15) | 0.36913(6) | 0.56893(13) | 0.0147(6) |
| F18_33 | 0.98542(9)  | 0.44493(4) | 0.72613(8)  | 0.0200(4) |
| C19_33 | 0.88068(14) | 0.44981(5) | 0.67876(12) | 0.0110(6) |
| C20_33 | 0.82394(15) | 0.46088(6) | 0.67329(13) | 0.0143(6) |
| C21_33 | 0.81860(16) | 0.47827(6) | 0.70730(13) | 0.0160(6) |

|        |             |            |             |           |
|--------|-------------|------------|-------------|-----------|
| C22_33 | 0.87033(18) | 0.48462(6) | 0.74746(13) | 0.0176(7) |
| C23_33 | 0.92697(17) | 0.47348(6) | 0.75388(13) | 0.0179(7) |
| C24_33 | 0.93158(15) | 0.45607(6) | 0.71973(12) | 0.0137(6) |
| C1_33  | 0.92591(14) | 0.39280(5) | 0.64355(12) | 0.0108(6) |
| N1_34  | 0.94783(12) | 0.73533(5) | 0.60755(10) | 0.0100(5) |
| F1_34  | 0.94624(10) | 0.69069(3) | 0.65250(9)  | 0.0196(4) |
| C2_34  | 0.91448(15) | 0.70802(5) | 0.66553(12) | 0.0122(6) |
| N2_34  | 0.88213(12) | 0.76991(4) | 0.64137(10) | 0.0094(5) |
| F2_34  | 0.88045(11) | 0.68272(4) | 0.72034(9)  | 0.0213(4) |
| C3_34  | 0.88073(16) | 0.70350(6) | 0.70050(12) | 0.0140(6) |
| F3_34  | 0.81060(11) | 0.71586(4) | 0.74683(9)  | 0.0232(5) |
| C4_34  | 0.84471(16) | 0.72072(6) | 0.71458(13) | 0.0158(6) |
| F4_34  | 0.80670(10) | 0.75793(4) | 0.70628(8)  | 0.0183(4) |
| C5_34  | 0.84395(15) | 0.74230(6) | 0.69406(12) | 0.0133(6) |
| F5_34  | 0.86080(11) | 0.81140(4) | 0.58364(8)  | 0.0212(4) |
| C6_34  | 0.87988(14) | 0.74765(5) | 0.65934(11) | 0.0099(5) |
| F6_34  | 0.90937(11) | 0.81833(4) | 0.50376(8)  | 0.0220(5) |
| C7_34  | 0.90309(14) | 0.77378(5) | 0.59744(11) | 0.0100(5) |
| F7_34  | 0.97361(11) | 0.78511(4) | 0.47136(8)  | 0.0214(4) |
| C8_34  | 0.89392(15) | 0.79471(6) | 0.57038(12) | 0.0127(6) |
| F8_34  | 0.98684(10) | 0.74359(4) | 0.51615(8)  | 0.0188(4) |
| C9_34  | 0.91846(16) | 0.79857(6) | 0.52910(13) | 0.0137(6) |
| F9_34  | 0.94235(9)  | 0.69587(4) | 0.54560(8)  | 0.0206(4) |
| C10_34 | 0.95163(16) | 0.78123(6) | 0.51212(12) | 0.0148(6) |
| F10_34 | 1.04667(11) | 0.67109(4) | 0.54725(9)  | 0.0241(5) |
| C11_34 | 0.95917(14) | 0.76008(6) | 0.53615(12) | 0.0122(6) |
| F11_34 | 1.15865(10) | 0.68500(4) | 0.60808(9)  | 0.0227(5) |
| C12_34 | 0.93642(14) | 0.75590(5) | 0.57999(12) | 0.0096(5) |
| F12_34 | 1.16800(9)  | 0.72344(4) | 0.66865(8)  | 0.0204(4) |
| C13_34 | 1.00212(14) | 0.72202(5) | 0.60664(12) | 0.0107(6) |
| F13_34 | 1.06445(9)  | 0.74835(4) | 0.66544(8)  | 0.0157(4) |
| C14_34 | 1.05993(15) | 0.72924(6) | 0.63713(12) | 0.0115(6) |
| F14_34 | 0.77534(10) | 0.79728(4) | 0.62926(9)  | 0.0218(4) |
| C15_34 | 1.11315(14) | 0.71661(6) | 0.63824(12) | 0.0136(6) |
| F15_34 | 0.76815(12) | 0.83002(4) | 0.69982(11) | 0.0329(6) |
| C16_34 | 1.10806(15) | 0.69722(6) | 0.60776(13) | 0.0154(6) |
| F16_34 | 0.86642(14) | 0.83720(4) | 0.78518(9)  | 0.0350(6) |
| C17_34 | 1.05037(16) | 0.69004(6) | 0.57619(13) | 0.0148(6) |
| F17_34 | 0.97298(13) | 0.81249(4) | 0.79839(9)  | 0.0350(6) |
| C18_34 | 0.99742(15) | 0.70254(6) | 0.57567(13) | 0.0140(6) |
| F18_34 | 0.97945(10) | 0.77966(4) | 0.72720(8)  | 0.0216(4) |
| C19_34 | 0.87826(15) | 0.78852(5) | 0.67640(12) | 0.0112(6) |
| C20_34 | 0.82399(16) | 0.80120(6) | 0.66985(13) | 0.0151(6) |
| C21_34 | 0.81996(18) | 0.81774(6) | 0.70637(15) | 0.0204(7) |
| C22_34 | 0.8706(2)   | 0.82141(6) | 0.75002(14) | 0.0215(8) |
| C23_34 | 0.92474(19) | 0.80874(6) | 0.75683(13) | 0.0203(7) |
| C24_34 | 0.92813(16) | 0.79228(6) | 0.72005(12) | 0.0151(6) |
| C1_34  | 0.91466(14) | 0.73002(5) | 0.64351(11) | 0.0092(5) |
| N1_35  | 0.54673(12) | 0.56744(5) | 0.38915(10) | 0.0103(5) |
| F1_35  | 0.54564(10) | 0.52204(4) | 0.34769(9)  | 0.0219(4) |
| C2_35  | 0.57659(15) | 0.53903(6) | 0.33208(13) | 0.0134(6) |
| N2_35  | 0.61239(12) | 0.60094(5) | 0.35226(10) | 0.0103(5) |
| F2_35  | 0.60595(10) | 0.51259(4) | 0.27686(8)  | 0.0222(5) |
| C3_35  | 0.60779(15) | 0.53368(6) | 0.29578(13) | 0.0154(6) |
| F3_35  | 0.67420(11) | 0.54492(4) | 0.24487(9)  | 0.0267(5) |

|        |             |             |             |            |
|--------|-------------|-------------|-------------|------------|
| C4_35  | 0.64280(17) | 0.55036(6)  | 0.27897(13) | 0.0173(7)  |
| F4_35  | 0.68303(11) | 0.58745(4)  | 0.28440(9)  | 0.0232(5)  |
| C5_35  | 0.64581(16) | 0.57244(6)  | 0.29867(13) | 0.0153(6)  |
| F5_35  | 0.64152(11) | 0.64215(4)  | 0.41001(8)  | 0.0212(4)  |
| C6_35  | 0.61285(15) | 0.57831(6)  | 0.33467(12) | 0.0114(6)  |
| F6_35  | 0.59660(12) | 0.65058(4)  | 0.49153(8)  | 0.0249(5)  |
| C7_35  | 0.59411(14) | 0.60520(5)  | 0.39743(11) | 0.0082(5)  |
| F7_35  | 0.53118(11) | 0.61852(4)  | 0.52675(8)  | 0.0244(5)  |
| C8_35  | 0.60658(15) | 0.62626(5)  | 0.42429(12) | 0.0124(6)  |
| F8_35  | 0.51174(10) | 0.57697(4)  | 0.48230(8)  | 0.0204(4)  |
| C9_35  | 0.58430(16) | 0.63075(6)  | 0.46682(13) | 0.0156(6)  |
| F9_35  | 0.55208(10) | 0.52972(4)  | 0.45598(9)  | 0.0226(5)  |
| C10_35 | 0.55046(16) | 0.61411(6)  | 0.48488(13) | 0.0146(6)  |
| F10_35 | 0.44860(11) | 0.50506(4)  | 0.45618(10) | 0.0272(5)  |
| C11_35 | 0.53978(15) | 0.59300(6)  | 0.46092(13) | 0.0138(6)  |
| F11_35 | 0.33656(10) | 0.51768(4)  | 0.39312(9)  | 0.0242(5)  |
| C12_35 | 0.56023(14) | 0.58815(5)  | 0.41608(12) | 0.0104(5)  |
| F12_35 | 0.32668(9)  | 0.55479(4)  | 0.32834(8)  | 0.0200(4)  |
| C13_35 | 0.49229(14) | 0.55465(5)  | 0.39197(12) | 0.0113(6)  |
| F13_35 | 0.42967(9)  | 0.57970(4)  | 0.32979(8)  | 0.0156(4)  |
| C14_35 | 0.43464(14) | 0.56116(5)  | 0.36018(12) | 0.0098(5)  |
| F14_35 | 0.71995(10) | 0.62771(4)  | 0.35870(10) | 0.0295(5)  |
| C15_35 | 0.38153(14) | 0.54867(6)  | 0.35993(12) | 0.0126(6)  |
| F15_35 | 0.72269(14) | 0.66032(5)  | 0.28672(13) | 0.0421(7)  |
| C16_35 | 0.38661(15) | 0.52976(6)  | 0.39281(13) | 0.0144(6)  |
| F16_35 | 0.61996(17) | 0.66800(4)  | 0.20598(10) | 0.0452(8)  |
| C17_35 | 0.44416(16) | 0.52333(6)  | 0.42531(14) | 0.0154(6)  |
| F17_35 | 0.51367(15) | 0.64417(5)  | 0.19839(10) | 0.0431(7)  |
| C18_35 | 0.49689(15) | 0.53573(6)  | 0.42484(13) | 0.0140(6)  |
| F18_35 | 0.51126(10) | 0.61122(4)  | 0.27074(9)  | 0.0218(4)  |
| C19_35 | 0.61535(15) | 0.61943(5)  | 0.31623(13) | 0.0127(6)  |
| C20_35 | 0.66936(17) | 0.63180(6)  | 0.31997(15) | 0.0198(7)  |
| C21_35 | 0.6712(2)   | 0.64841(7)  | 0.28260(17) | 0.0271(9)  |
| C22_35 | 0.6185(2)   | 0.65224(7)  | 0.24192(16) | 0.0299(10) |
| C23_35 | 0.5640(2)   | 0.63999(6)  | 0.23767(14) | 0.0256(8)  |
| C24_35 | 0.56293(16) | 0.62332(6)  | 0.27507(13) | 0.0156(6)  |
| C1_35  | 0.57807(14) | 0.56140(5)  | 0.35276(12) | 0.0103(5)  |
| N1_36  | 1.10875(12) | -0.10033(5) | 0.34971(10) | 0.0108(5)  |
| F1_36  | 1.13698(10) | -0.14145(4) | 0.40897(8)  | 0.0190(4)  |
| C2_36  | 1.10394(14) | -0.12492(6) | 0.42322(12) | 0.0117(6)  |
| N2_36  | 1.04300(12) | -0.06647(5) | 0.38562(10) | 0.0106(5)  |
| F2_36  | 1.09719(10) | -0.14793(4) | 0.49376(8)  | 0.0200(4)  |
| C3_36  | 1.08377(15) | -0.12865(6) | 0.46714(13) | 0.0135(6)  |
| F3_36  | 1.03435(10) | -0.11512(4) | 0.52881(8)  | 0.0201(4)  |
| C4_36  | 1.05106(15) | -0.11152(6) | 0.48538(12) | 0.0130(6)  |
| F4_36  | 1.01004(10) | -0.07483(4) | 0.47982(8)  | 0.0172(4)  |
| C5_36  | 1.03868(14) | -0.09096(6) | 0.45929(12) | 0.0113(6)  |
| F5_36  | 1.03956(11) | -0.02165(3) | 0.34083(9)  | 0.0217(4)  |
| C6_36  | 1.05757(14) | -0.08682(5) | 0.41373(12) | 0.0103(5)  |
| F6_36  | 1.09826(12) | -0.01285(4) | 0.26843(8)  | 0.0242(5)  |
| C7_36  | 1.07362(14) | -0.06076(5) | 0.34818(12) | 0.0104(5)  |
| F7_36  | 1.17018(11) | -0.04465(4) | 0.24054(9)  | 0.0262(5)  |
| C8_36  | 1.07103(16) | -0.03866(6) | 0.32650(12) | 0.0140(6)  |
| F8_36  | 1.18062(11) | -0.08690(4) | 0.28199(9)  | 0.0240(5)  |
| C9_36  | 1.10202(17) | -0.03367(6) | 0.28950(13) | 0.0164(6)  |

|        |             |             |             |           |
|--------|-------------|-------------|-------------|-----------|
| F9_36  | 1.22250(9)  | -0.12228(4) | 0.36097(8)  | 0.0196(4) |
| C10_36 | 1.13825(17) | -0.05021(6) | 0.27431(13) | 0.0181(7) |
| F10_36 | 1.23638(10) | -0.15683(4) | 0.29585(9)  | 0.0227(5) |
| C11_36 | 1.14228(16) | -0.07191(6) | 0.29511(13) | 0.0151(6) |
| F11_36 | 1.13612(11) | -0.17194(4) | 0.22003(9)  | 0.0228(5) |
| C12_36 | 1.10833(15) | -0.07788(6) | 0.33088(12) | 0.0119(6) |
| F12_36 | 1.02363(11) | -0.15187(4) | 0.20658(9)  | 0.0274(5) |
| C13_36 | 1.11641(15) | -0.11922(6) | 0.31676(12) | 0.0118(6) |
| F13_36 | 1.01086(10) | -0.11625(4) | 0.26959(8)  | 0.0218(4) |
| C14_36 | 1.06607(15) | -0.12635(6) | 0.27687(12) | 0.0133(6) |
| F14_36 | 1.05125(10) | -0.02923(4) | 0.45390(9)  | 0.0222(5) |
| C15_36 | 1.07201(16) | -0.14442(6) | 0.24432(13) | 0.0170(7) |
| F15_36 | 0.94972(11) | -0.00296(4) | 0.45346(9)  | 0.0258(5) |
| C16_36 | 1.12968(17) | -0.15470(6) | 0.25110(13) | 0.0151(6) |
| F16_36 | 0.83772(10) | -0.01349(4) | 0.38765(9)  | 0.0231(5) |
| C17_36 | 1.18098(15) | -0.14719(6) | 0.29042(13) | 0.0142(6) |
| F17_36 | 0.82456(10) | -0.05054(4) | 0.32276(9)  | 0.0238(5) |
| C18_36 | 1.17402(14) | -0.12962(6) | 0.32322(12) | 0.0126(6) |
| F18_36 | 0.92574(9)  | -0.07672(4) | 0.32395(8)  | 0.0184(4) |
| C19_36 | 0.98968(14) | -0.05307(6) | 0.38851(12) | 0.0117(6) |
| C20_36 | 0.99562(15) | -0.03451(6) | 0.42230(13) | 0.0143(6) |
| C21_36 | 0.94447(16) | -0.02109(6) | 0.42208(14) | 0.0174(7) |
| C22_36 | 0.88658(15) | -0.02663(6) | 0.38823(13) | 0.0153(6) |
| C23_36 | 0.88009(15) | -0.04535(6) | 0.35528(13) | 0.0159(6) |
| C24_36 | 0.93153(15) | -0.05868(6) | 0.35574(12) | 0.0123(6) |
| C1_36  | 1.09111(14) | -0.10422(5) | 0.39518(12) | 0.0098(5) |
| N1_37  | 0.45421(12) | 0.76732(5)  | 0.60550(10) | 0.0107(5) |
| F1_37  | 0.45892(10) | 0.81276(3)  | 0.64740(9)  | 0.0193(4) |
| C2_37  | 0.42747(15) | 0.79611(5)  | 0.66345(12) | 0.0115(6) |
| N2_37  | 0.38769(12) | 0.73440(4)  | 0.64350(10) | 0.0088(5) |
| F2_37  | 0.40126(10) | 0.82288(3)  | 0.71960(8)  | 0.0179(4) |
| C3_37  | 0.39688(15) | 0.80192(6)  | 0.70037(12) | 0.0130(6) |
| F3_37  | 0.32965(10) | 0.79174(4)  | 0.75048(8)  | 0.0191(4) |
| C4_37  | 0.36061(15) | 0.78559(6)  | 0.71675(12) | 0.0127(6) |
| F4_37  | 0.31816(10) | 0.74902(4)  | 0.71209(9)  | 0.0205(4) |
| C5_37  | 0.35637(15) | 0.76352(6)  | 0.69745(12) | 0.0129(6) |
| F5_37  | 0.35833(10) | 0.69255(4)  | 0.58664(8)  | 0.0187(4) |
| C6_37  | 0.38906(14) | 0.75692(5)  | 0.66163(11) | 0.0096(5) |
| F6_37  | 0.39812(10) | 0.68490(4)  | 0.50218(8)  | 0.0202(4) |
| C7_37  | 0.40483(14) | 0.72992(5)  | 0.59783(11) | 0.0090(5) |
| F7_37  | 0.46141(10) | 0.71691(4)  | 0.46494(8)  | 0.0199(4) |
| C8_37  | 0.39159(15) | 0.70890(6)  | 0.57104(12) | 0.0126(6) |
| F8_37  | 0.48539(10) | 0.75785(4)  | 0.51112(8)  | 0.0178(4) |
| C9_37  | 0.41152(15) | 0.70452(6)  | 0.52737(12) | 0.0130(6) |
| F9_37  | 0.44868(10) | 0.80329(4)  | 0.53457(9)  | 0.0224(5) |
| C10_37 | 0.44452(15) | 0.72115(6)  | 0.50813(12) | 0.0129(6) |
| F10_37 | 0.55100(11) | 0.82920(4)  | 0.53518(10) | 0.0304(6) |
| C11_37 | 0.45729(14) | 0.74205(6)  | 0.53273(12) | 0.0118(6) |
| F11_37 | 0.66172(10) | 0.81883(4)  | 0.60293(10) | 0.0266(5) |
| C12_37 | 0.43885(13) | 0.74678(5)  | 0.57836(12) | 0.0093(5) |
| F12_37 | 0.67293(9)  | 0.78266(4)  | 0.67022(9)  | 0.0243(5) |
| C13_37 | 0.50861(14) | 0.78010(5)  | 0.60219(12) | 0.0111(6) |
| F13_37 | 0.57055(9)  | 0.75699(4)  | 0.66888(8)  | 0.0180(4) |
| C14_37 | 0.56602(14) | 0.77459(6)  | 0.63620(12) | 0.0121(6) |
| F14_37 | 0.27375(9)  | 0.71322(4)  | 0.63493(8)  | 0.0184(4) |

|        |             |             |             |           |
|--------|-------------|-------------|-------------|-----------|
| C15_37 | 0.61830(15) | 0.78757(6)  | 0.63652(13) | 0.0154(6) |
| F15_37 | 0.26041(10) | 0.67910(4)  | 0.70146(9)  | 0.0219(4) |
| C16_37 | 0.61276(15) | 0.80602(6)  | 0.60252(14) | 0.0165(6) |
| F16_37 | 0.36200(11) | 0.66363(4)  | 0.77579(9)  | 0.0236(5) |
| C17_37 | 0.55552(16) | 0.81120(6)  | 0.56741(14) | 0.0164(6) |
| F17_37 | 0.47485(11) | 0.68278(5)  | 0.78621(9)  | 0.0308(6) |
| C18_37 | 0.50351(14) | 0.79825(6)  | 0.56712(13) | 0.0144(6) |
| F18_37 | 0.48686(10) | 0.71846(4)  | 0.72240(8)  | 0.0224(5) |
| C19_37 | 0.38023(14) | 0.71591(5)  | 0.67761(12) | 0.0103(5) |
| C20_37 | 0.32240(14) | 0.70581(6)  | 0.67244(12) | 0.0123(6) |
| C21_37 | 0.31581(16) | 0.68846(6)  | 0.70573(13) | 0.0146(6) |
| C22_37 | 0.36774(17) | 0.68072(6)  | 0.74410(13) | 0.0172(7) |
| C23_37 | 0.42543(16) | 0.69062(6)  | 0.74948(13) | 0.0168(6) |
| C24_37 | 0.43187(15) | 0.70844(6)  | 0.71664(13) | 0.0140(6) |
| C1_37  | 0.42419(14) | 0.77363(5)  | 0.64288(12) | 0.0098(5) |
| C1_38  | 0.57879(16) | 0.67703(6)  | 0.61186(13) | 0.0188(7) |
| C2_38  | 0.57937(16) | 0.69536(6)  | 0.64472(14) | 0.0196(7) |
| C3_38  | 0.62703(18) | 0.69866(7)  | 0.68967(14) | 0.0243(8) |
| H3_38  | 0.626831    | 0.711314    | 0.712302    | 0.029     |
| C4_38  | 0.67543(18) | 0.68289(7)  | 0.70086(15) | 0.0261(8) |
| H4_38  | 0.709548    | 0.684835    | 0.731279    | 0.031     |
| C5_38  | 0.67431(19) | 0.66411(7)  | 0.66762(16) | 0.0286(9) |
| H5_38  | 0.707486    | 0.653295    | 0.675894    | 0.034     |
| C6_38  | 0.6256(2)   | 0.66113(7)  | 0.62302(15) | 0.0267(8) |
| H6_38  | 0.624625    | 0.648320    | 0.600547    | 0.032     |
| F1_38  | 0.53035(11) | 0.67501(4)  | 0.56816(9)  | 0.0278(5) |
| F2_38  | 0.53133(12) | 0.71067(5)  | 0.63166(10) | 0.0350(6) |
| O1_1   | 0.8022(17)  | 0.5581(5)   | 0.5280(8)   | 0.018(6)  |
| C1_1   | 0.8055(10)  | 0.5580(3)   | 0.4779(9)   | 0.024(4)  |
| C2_1   | 0.7724(12)  | 0.5356(4)   | 0.4516(9)   | 0.050(4)  |
| F1_1   | 0.8154(13)  | 0.5194(3)   | 0.4525(9)   | 0.036(5)  |
| F2_1   | 0.740(2)    | 0.5395(8)   | 0.4017(11)  | 0.063(5)  |
| F3_1   | 0.7297(16)  | 0.5316(6)   | 0.4774(15)  | 0.051(5)  |
| C3_1   | 0.7655(10)  | 0.5789(3)   | 0.4520(10)  | 0.034(5)  |
| F4_1   | 0.7745(19)  | 0.5966(5)   | 0.4858(14)  | 0.090(12) |
| F5_1   | 0.7053(10)  | 0.5722(4)   | 0.4443(11)  | 0.032(6)  |
| F6_1   | 0.7806(14)  | 0.5857(5)   | 0.4092(11)  | 0.032(4)  |
| C4_1   | 0.8733(11)  | 0.5584(5)   | 0.4749(12)  | 0.032(5)  |
| F7_1   | 0.9023(15)  | 0.5767(5)   | 0.5011(19)  | 0.037(5)  |
| F8_1   | 0.878(2)    | 0.5598(11)  | 0.4258(14)  | 0.047(5)  |
| F9_1   | 0.9024(16)  | 0.5391(5)   | 0.4961(14)  | 0.047(5)  |
| O1_39  | 0.7259(8)   | 0.7349(5)   | 0.3762(9)   | 0.011(3)  |
| C1_39  | 0.7861(6)   | 0.73180(19) | 0.3766(4)   | 0.014(2)  |
| C2_39  | 0.8126(5)   | 0.70973(19) | 0.4079(5)   | 0.030(2)  |
| F1_39  | 0.7696(5)   | 0.69326(14) | 0.3963(5)   | 0.048(2)  |
| F2_39  | 0.8630(5)   | 0.7023(2)   | 0.3949(5)   | 0.047(3)  |
| F3_39  | 0.8289(4)   | 0.7138(2)   | 0.4596(4)   | 0.043(2)  |
| C3_39  | 0.8262(8)   | 0.7527(2)   | 0.4013(6)   | 0.026(3)  |
| F4_39  | 0.8169(12)  | 0.7706(3)   | 0.3686(7)   | 0.040(3)  |
| F5_39  | 0.8126(7)   | 0.7593(2)   | 0.4451(5)   | 0.036(3)  |
| F6_39  | 0.8871(7)   | 0.7482(3)   | 0.4138(10)  | 0.037(3)  |
| C4_39  | 0.7881(7)   | 0.7294(2)   | 0.3185(5)   | 0.026(2)  |
| F7_39  | 0.7501(7)   | 0.7448(2)   | 0.2888(5)   | 0.033(2)  |
| F8_39  | 0.8451(7)   | 0.7328(4)   | 0.3125(8)   | 0.033(3)  |
| F9_39  | 0.7689(5)   | 0.70845(19) | 0.3001(4)   | 0.044(2)  |

|       |            |            |            |          |
|-------|------------|------------|------------|----------|
| O1_40 | 0.8493(18) | 0.2709(3)  | 0.5887(18) | 0.016(7) |
| C1_40 | 0.8358(8)  | 0.2931(4)  | 0.5794(7)  | 0.016(4) |
| C2_40 | 0.8839(9)  | 0.3037(4)  | 0.5532(7)  | 0.026(4) |
| F1_40 | 0.8700(12) | 0.2977(4)  | 0.5027(7)  | 0.034(4) |
| F2_40 | 0.8849(16) | 0.3265(3)  | 0.5562(11) | 0.037(4) |
| F3_40 | 0.9409(8)  | 0.2962(4)  | 0.5771(9)  | 0.031(4) |
| C3_40 | 0.8413(10) | 0.3056(4)  | 0.6324(7)  | 0.023(4) |
| F4_40 | 0.8107(10) | 0.2940(3)  | 0.6606(7)  | 0.028(4) |
| F5_40 | 0.9006(9)  | 0.3063(3)  | 0.6609(7)  | 0.027(4) |
| F6_40 | 0.820(2)   | 0.3270(4)  | 0.6260(17) | 0.029(5) |
| C4_40 | 0.7693(9)  | 0.2967(4)  | 0.5420(7)  | 0.022(4) |
| F7_40 | 0.7262(8)  | 0.2940(4)  | 0.5679(8)  | 0.034(5) |
| F8_40 | 0.7642(19) | 0.3174(4)  | 0.5193(16) | 0.038(5) |
| F9_40 | 0.7552(9)  | 0.2808(3)  | 0.5042(6)  | 0.021(4) |
| O1_41 | 0.7658(9)  | 0.5685(6)  | 0.6147(11) | 0.012(4) |
| C1_41 | 0.7057(8)  | 0.5659(2)  | 0.6144(5)  | 0.018(3) |
| C2_41 | 0.7040(8)  | 0.5573(3)  | 0.6696(6)  | 0.028(3) |
| F1_41 | 0.7453(8)  | 0.5686(2)  | 0.7073(6)  | 0.030(3) |
| F2_41 | 0.6475(9)  | 0.5604(5)  | 0.6771(10) | 0.033(4) |
| F3_41 | 0.7180(7)  | 0.5348(2)  | 0.6745(5)  | 0.040(2) |
| C3_41 | 0.6723(6)  | 0.5483(2)  | 0.5720(6)  | 0.034(3) |
| F4_41 | 0.6582(7)  | 0.5579(3)  | 0.5244(5)  | 0.043(3) |
| F5_41 | 0.7083(6)  | 0.5305(2)  | 0.5691(6)  | 0.050(3) |
| F6_41 | 0.6191(6)  | 0.5406(3)  | 0.5794(6)  | 0.044(3) |
| C4_41 | 0.6715(10) | 0.5893(3)  | 0.6033(7)  | 0.026(3) |
| F7_41 | 0.6852(13) | 0.5997(3)  | 0.5629(7)  | 0.036(4) |
| F8_41 | 0.6098(9)  | 0.5870(4)  | 0.5911(11) | 0.032(3) |
| F9_41 | 0.6891(12) | 0.6031(4)  | 0.6450(6)  | 0.033(3) |
| O1_42 | 0.8282(19) | -0.0618(3) | 0.5689(14) | 0.026(7) |
| C1_42 | 0.8523(9)  | -0.0411(3) | 0.5818(7)  | 0.030(4) |
| C2_42 | 0.9140(9)  | -0.0379(4) | 0.5673(8)  | 0.040(4) |
| F1_42 | 0.9031(14) | -0.0341(5) | 0.5158(8)  | 0.070(7) |
| F2_42 | 0.948(2)   | -0.0202(6) | 0.5923(18) | 0.041(5) |
| F3_42 | 0.9481(9)  | -0.0568(3) | 0.5781(10) | 0.038(4) |
| C3_42 | 0.8638(10) | -0.0373(4) | 0.6425(8)  | 0.056(5) |
| F4_42 | 0.8144(12) | -0.0458(5) | 0.6553(9)  | 0.057(4) |
| F5_42 | 0.9148(11) | -0.0489(4) | 0.6667(10) | 0.091(8) |
| F6_42 | 0.8611(16) | -0.0146(4) | 0.6494(15) | 0.065(5) |
| C4_42 | 0.8037(10) | -0.0226(3) | 0.5556(10) | 0.059(5) |
| F7_42 | 0.7597(13) | -0.0229(4) | 0.5816(14) | 0.083(8) |
| F8_42 | 0.827(2)   | -0.0014(4) | 0.559(2)   | 0.071(5) |
| F9_42 | 0.7801(13) | -0.0277(5) | 0.5049(10) | 0.057(5) |
| O1_43 | 0.8637(10) | 0.5631(4)  | 0.6237(9)  | 0.024(5) |
| C1_43 | 0.9201(8)  | 0.5561(3)  | 0.6549(6)  | 0.016(4) |
| C2_43 | 0.9705(8)  | 0.5712(3)  | 0.6400(7)  | 0.031(5) |
| F1_43 | 0.9583(11) | 0.5725(5)  | 0.5879(6)  | 0.039(6) |
| F2_43 | 1.0276(8)  | 0.5626(4)  | 0.6575(10) | 0.034(3) |
| F3_43 | 0.9696(12) | 0.5926(3)  | 0.6593(9)  | 0.040(5) |
| C3_43 | 0.9233(9)  | 0.5620(3)  | 0.7122(6)  | 0.026(4) |
| F4_43 | 0.8975(11) | 0.5463(4)  | 0.7360(8)  | 0.034(5) |
| F5_43 | 0.8914(8)  | 0.5817(3)  | 0.7131(6)  | 0.016(3) |
| F6_43 | 0.9801(7)  | 0.5677(4)  | 0.7418(7)  | 0.026(5) |
| C4_43 | 0.9181(10) | 0.5313(3)  | 0.6344(9)  | 0.039(5) |
| F7_43 | 0.8696(14) | 0.5289(5)  | 0.5895(10) | 0.047(5) |
| F8_43 | 0.8994(13) | 0.5150(4)  | 0.6611(8)  | 0.046(7) |

|       |            |             |            |          |
|-------|------------|-------------|------------|----------|
| F9_43 | 0.9689(12) | 0.5264(5)   | 0.6198(13) | 0.061(8) |
| O1_44 | 0.7374(10) | 0.5677(4)   | 0.5811(9)  | 0.012(4) |
| C1_44 | 0.6975(8)  | 0.5614(3)   | 0.6089(7)  | 0.023(4) |
| C2_44 | 0.7260(10) | 0.5418(3)   | 0.6481(8)  | 0.032(4) |
| F1_44 | 0.7570(14) | 0.5268(4)   | 0.6268(13) | 0.045(4) |
| F2_44 | 0.6832(12) | 0.5299(5)   | 0.6636(11) | 0.033(4) |
| F3_44 | 0.7660(11) | 0.5504(5)   | 0.6911(9)  | 0.037(4) |
| C3_44 | 0.6818(10) | 0.5824(3)   | 0.6387(8)  | 0.030(4) |
| F4_44 | 0.6456(13) | 0.5973(5)   | 0.6055(10) | 0.032(3) |
| F5_44 | 0.7339(11) | 0.5938(5)   | 0.6624(11) | 0.046(7) |
| F6_44 | 0.6537(14) | 0.5775(6)   | 0.6755(11) | 0.039(5) |
| C4_44 | 0.6365(9)  | 0.5523(4)   | 0.5695(8)  | 0.041(4) |
| F7_44 | 0.6216(14) | 0.5654(5)   | 0.5264(9)  | 0.046(5) |
| F8_44 | 0.5881(10) | 0.5524(5)   | 0.5897(12) | 0.042(7) |
| F9_44 | 0.6455(14) | 0.5309(4)   | 0.5554(13) | 0.053(8) |
| O1_45 | 0.2452(5)  | 0.5994(2)   | 0.5840(5)  | 0.018(2) |
| C1_45 | 0.2032(6)  | 0.6044(2)   | 0.6102(5)  | 0.020(3) |
| C2_45 | 0.1436(7)  | 0.6142(2)   | 0.5709(5)  | 0.031(3) |
| F1_45 | 0.1295(6)  | 0.6023(2)   | 0.5262(4)  | 0.035(3) |
| F2_45 | 0.0946(6)  | 0.6136(3)   | 0.5907(6)  | 0.044(3) |
| F3_45 | 0.1528(6)  | 0.63610(18) | 0.5598(4)  | 0.036(2) |
| C3_45 | 0.2303(8)  | 0.6224(3)   | 0.6536(6)  | 0.029(4) |
| F4_45 | 0.2694(7)  | 0.6127(3)   | 0.6955(5)  | 0.048(3) |
| F5_45 | 0.2586(9)  | 0.6390(4)   | 0.6337(8)  | 0.040(4) |
| F6_45 | 0.1850(11) | 0.6325(4)   | 0.6699(10) | 0.039(4) |
| C4_45 | 0.1848(7)  | 0.5821(3)   | 0.6349(6)  | 0.034(3) |
| F7_45 | 0.2358(6)  | 0.5706(2)   | 0.6598(5)  | 0.044(3) |
| F8_45 | 0.1520(7)  | 0.5866(3)   | 0.6690(6)  | 0.042(3) |
| F9_45 | 0.1512(10) | 0.5684(4)   | 0.5973(8)  | 0.045(4) |
| O1_46 | 0.3186(6)  | 0.59640(17) | 0.5157(4)  | 0.012(2) |
| C1_46 | 0.3077(6)  | 0.6110(2)   | 0.4744(5)  | 0.013(3) |
| C2_46 | 0.3307(6)  | 0.5994(2)   | 0.4301(5)  | 0.026(3) |
| F1_46 | 0.3872(5)  | 0.58994(18) | 0.4494(5)  | 0.038(2) |
| F2_46 | 0.3355(7)  | 0.61371(18) | 0.3924(4)  | 0.045(3) |
| F3_46 | 0.2913(7)  | 0.5826(2)   | 0.4076(5)  | 0.040(3) |
| C3_46 | 0.2362(6)  | 0.6157(2)   | 0.4526(5)  | 0.019(3) |
| F4_46 | 0.2178(4)  | 0.63108(16) | 0.4828(4)  | 0.026(2) |
| F5_46 | 0.2043(7)  | 0.5964(2)   | 0.4525(5)  | 0.033(3) |
| F6_46 | 0.2214(6)  | 0.6240(2)   | 0.4034(4)  | 0.031(2) |
| C4_46 | 0.3366(8)  | 0.6349(3)   | 0.4937(8)  | 0.013(3) |
| F7_46 | 0.3052(9)  | 0.6455(4)   | 0.5245(9)  | 0.018(3) |
| F8_46 | 0.333(2)   | 0.6492(6)   | 0.4537(12) | 0.023(4) |
| F9_46 | 0.3960(7)  | 0.6335(4)   | 0.5213(5)  | 0.014(2) |

Table S 9 Atomic coordinates and  $U_{eq}$  [ $\text{\AA}^2$ ] for 5

| Atom | x           | y           | z           | $U_{eq}$    |
|------|-------------|-------------|-------------|-------------|
| Sn1  | 0.35366(2)  | 0.87302(2)  | 0.71801(2)  | 0.02176(5)  |
| Al2  | 0.35956(5)  | 0.50274(3)  | 0.58309(3)  | 0.01385(17) |
| Al1  | 0.37895(6)  | 0.84219(3)  | 0.36260(4)  | 0.01548(18) |
| O1_1 | 0.3647(8)   | 0.8872(5)   | 0.4273(5)   | 0.020(2)    |
| C1_1 | 0.4006(4)   | 0.9200(3)   | 0.4743(3)   | 0.0203(14)  |
| C2_1 | 0.4435(4)   | 0.8812(2)   | 0.5270(2)   | 0.0308(12)  |
| F1_1 | 0.51739(18) | 0.85998(11) | 0.50680(12) | 0.0405(9)   |



|      |             |             |             |            |
|------|-------------|-------------|-------------|------------|
| F2_1 | 0.4591(7)   | 0.9091(5)   | 0.5820(4)   | 0.0372(14) |
| F3_1 | 0.3914(3)   | 0.8380(2)   | 0.5397(2)   | 0.0528(14) |
| C3_1 | 0.3295(4)   | 0.9564(3)   | 0.5046(2)   | 0.0431(14) |
| F4_1 | 0.2776(3)   | 0.9791(2)   | 0.4588(3)   | 0.0544(15) |
| F5_1 | 0.2805(2)   | 0.92480(19) | 0.54306(15) | 0.0630(11) |
| F6_1 | 0.3604(10)  | 0.9983(5)   | 0.5414(4)   | 0.057(2)   |
| C4_1 | 0.4706(3)   | 0.9601(2)   | 0.4477(2)   | 0.0305(12) |
| F7_1 | 0.4344(3)   | 1.00294(12) | 0.41469(13) | 0.0486(9)  |
| F8_1 | 0.5202(9)   | 0.9838(5)   | 0.4929(7)   | 0.039(2)   |
| F9_1 | 0.5210(3)   | 0.9321(2)   | 0.4069(2)   | 0.0410(11) |
| O1_2 | 0.4148(8)   | 0.8740(6)   | 0.2934(5)   | 0.019(2)   |
| C1_2 | 0.3927(4)   | 0.9043(3)   | 0.2395(3)   | 0.0210(16) |
| C2_2 | 0.3387(4)   | 0.9565(2)   | 0.2573(3)   | 0.0272(12) |
| F1_2 | 0.3877(2)   | 0.99634(10) | 0.28549(12) | 0.0366(8)  |
| F2_2 | 0.3003(9)   | 0.9800(4)   | 0.2049(5)   | 0.037(2)   |
| F3_2 | 0.2774(3)   | 0.9433(2)   | 0.2985(2)   | 0.0318(10) |
| C3_2 | 0.3419(4)   | 0.8669(2)   | 0.1908(2)   | 0.0299(11) |
| F4_2 | 0.3773(5)   | 0.8151(3)   | 0.1873(5)   | 0.0460(17) |
| F5_2 | 0.26035(17) | 0.86137(12) | 0.20796(12) | 0.0357(8)  |
| F6_2 | 0.3414(7)   | 0.8880(5)   | 0.1313(5)   | 0.0368(19) |
| C4_2 | 0.4786(4)   | 0.9240(3)   | 0.2090(2)   | 0.0381(14) |
| F7_2 | 0.5163(2)   | 0.88202(17) | 0.17813(14) | 0.0499(9)  |
| F8_2 | 0.4639(9)   | 0.9669(5)   | 0.1671(4)   | 0.050(2)   |
| F9_2 | 0.5341(3)   | 0.9428(2)   | 0.2541(3)   | 0.0446(13) |
| O1_3 | 0.2795(8)   | 0.8137(10)  | 0.3424(11)  | 0.021(3)   |
| C1_3 | 0.2061(7)   | 0.7931(4)   | 0.3670(5)   | 0.019(2)   |
| C2_3 | 0.1856(4)   | 0.7378(2)   | 0.3297(2)   | 0.0301(15) |
| F1_3 | 0.2357(5)   | 0.6952(3)   | 0.3509(3)   | 0.0358(14) |
| F2_3 | 0.1035(4)   | 0.7204(3)   | 0.3349(4)   | 0.0375(14) |
| F3_3 | 0.2014(13)  | 0.7439(7)   | 0.2681(7)   | 0.033(2)   |
| C3_3 | 0.1307(4)   | 0.8356(2)   | 0.3553(3)   | 0.0318(15) |
| F4_3 | 0.1537(18)  | 0.8876(5)   | 0.3724(11)  | 0.048(3)   |
| F5_3 | 0.1073(8)   | 0.8382(3)   | 0.2943(4)   | 0.0431(19) |
| F6_3 | 0.0604(5)   | 0.8210(5)   | 0.3882(3)   | 0.0445(18) |
| C4_3 | 0.2122(4)   | 0.7797(3)   | 0.4405(3)   | 0.0334(15) |
| F7_3 | 0.2012(6)   | 0.8256(3)   | 0.4765(3)   | 0.0438(17) |
| F8_3 | 0.1527(12)  | 0.7417(7)   | 0.4586(9)   | 0.038(3)   |
| F9_3 | 0.2884(11)  | 0.7577(10)  | 0.4560(12)  | 0.045(3)   |
| O1_4 | 0.45613(13) | 0.79285(8)  | 0.38619(9)  | 0.0211(4)  |
| C1_4 | 0.51450(19) | 0.75404(13) | 0.36667(13) | 0.0243(7)  |
| C2_4 | 0.4698(2)   | 0.70558(14) | 0.32912(17) | 0.0352(8)  |
| F1_4 | 0.41263(13) | 0.72634(8)  | 0.28681(9)  | 0.0408(5)  |
| F2_4 | 0.52557(14) | 0.67346(8)  | 0.29604(10) | 0.0470(5)  |
| F3_4 | 0.42742(14) | 0.67140(9)  | 0.36888(11) | 0.0516(6)  |
| C3_4 | 0.5611(2)   | 0.72993(16) | 0.42750(16) | 0.0410(9)  |
| F4_4 | 0.61897(14) | 0.76726(10) | 0.45065(10) | 0.0550(6)  |
| F5_4 | 0.50527(15) | 0.71869(10) | 0.47278(9)  | 0.0560(6)  |
| F6_4 | 0.60311(15) | 0.68119(9)  | 0.41496(10) | 0.0559(6)  |
| C4_4 | 0.5832(2)   | 0.78176(15) | 0.32295(16) | 0.0352(8)  |
| F7_4 | 0.60596(13) | 0.83258(9)  | 0.34439(10) | 0.0469(5)  |
| F8_4 | 0.65489(13) | 0.74993(10) | 0.31966(11) | 0.0496(6)  |
| F9_4 | 0.55282(13) | 0.78803(9)  | 0.26288(8)  | 0.0430(5)  |
| O1_5 | 0.33387(14) | 0.48178(9)  | 0.50567(8)  | 0.0222(5)  |
| C1_5 | 0.35518(19) | 0.47761(12) | 0.44346(12) | 0.0188(6)  |
| C2_5 | 0.4341(2)   | 0.43779(13) | 0.43499(13) | 0.0255(7)  |

|       |             |             |             |            |
|-------|-------------|-------------|-------------|------------|
| F1_5  | 0.50768(11) | 0.46424(8)  | 0.45030(8)  | 0.0328(4)  |
| F2_5  | 0.44057(12) | 0.41884(8)  | 0.37463(8)  | 0.0332(4)  |
| F3_5  | 0.42841(12) | 0.39256(8)  | 0.47327(8)  | 0.0357(5)  |
| C3_5  | 0.2757(2)   | 0.45160(13) | 0.40721(13) | 0.0251(7)  |
| F4_5  | 0.20316(12) | 0.47621(8)  | 0.42555(8)  | 0.0330(4)  |
| F5_5  | 0.26858(12) | 0.39635(8)  | 0.41935(8)  | 0.0329(4)  |
| F6_5  | 0.27979(13) | 0.45755(8)  | 0.34367(7)  | 0.0381(5)  |
| C4_5  | 0.3754(2)   | 0.53656(13) | 0.41441(13) | 0.0226(7)  |
| F7_5  | 0.30449(12) | 0.56690(7)  | 0.40435(8)  | 0.0310(4)  |
| F8_5  | 0.41616(12) | 0.53277(8)  | 0.35843(7)  | 0.0317(4)  |
| F9_5  | 0.42672(12) | 0.56593(7)  | 0.45495(8)  | 0.0326(4)  |
| O1_6  | 0.2956(4)   | 0.46541(18) | 0.6354(2)   | 0.0171(9)  |
| C1_6  | 0.2599(3)   | 0.41439(18) | 0.64988(19) | 0.0194(10) |
| C2_6  | 0.2052(2)   | 0.39016(15) | 0.59257(17) | 0.0304(10) |
| F1_6  | 0.2565(3)   | 0.36671(16) | 0.54955(16) | 0.0454(9)  |
| F2_6  | 0.14947(18) | 0.35054(11) | 0.61208(14) | 0.0482(8)  |
| F3_6  | 0.16188(18) | 0.43069(12) | 0.56356(14) | 0.0456(8)  |
| C3_6  | 0.2002(3)   | 0.42427(17) | 0.70779(19) | 0.0391(11) |
| F4_6  | 0.2376(3)   | 0.45708(12) | 0.75155(14) | 0.0545(10) |
| F5_6  | 0.1263(4)   | 0.4499(3)   | 0.6877(2)   | 0.0590(15) |
| F6_6  | 0.1784(2)   | 0.37563(9)  | 0.73675(12) | 0.0504(8)  |
| C4_6  | 0.3310(2)   | 0.37135(14) | 0.66926(17) | 0.0267(8)  |
| F7_6  | 0.3662(2)   | 0.38381(17) | 0.7259(3)   | 0.0482(10) |
| F8_6  | 0.3022(2)   | 0.31795(13) | 0.67234(14) | 0.0324(7)  |
| F9_6  | 0.39438(19) | 0.37186(15) | 0.62699(16) | 0.0393(8)  |
| O1_7  | 0.46811(13) | 0.49134(8)  | 0.59591(9)  | 0.0218(5)  |
| C1_7  | 0.54213(19) | 0.50478(12) | 0.62833(13) | 0.0211(6)  |
| C2_7  | 0.5242(2)   | 0.53308(14) | 0.69425(13) | 0.0302(8)  |
| F1_7  | 0.50480(13) | 0.58810(8)  | 0.68748(8)  | 0.0363(5)  |
| F2_7  | 0.59321(13) | 0.53000(8)  | 0.73426(8)  | 0.0421(5)  |
| F3_7  | 0.45821(13) | 0.50836(9)  | 0.72224(8)  | 0.0426(5)  |
| C3_7  | 0.5928(2)   | 0.44875(13) | 0.63980(15) | 0.0311(8)  |
| F4_7  | 0.58973(13) | 0.41586(8)  | 0.58773(9)  | 0.0364(5)  |
| F5_7  | 0.55906(13) | 0.41921(8)  | 0.68786(9)  | 0.0406(5)  |
| F6_7  | 0.67620(12) | 0.45747(8)  | 0.65453(9)  | 0.0392(5)  |
| C4_7  | 0.5957(2)   | 0.54588(13) | 0.58690(14) | 0.0268(7)  |
| F7_7  | 0.62951(12) | 0.51873(8)  | 0.53701(8)  | 0.0378(5)  |
| F8_7  | 0.66016(12) | 0.57028(8)  | 0.61988(8)  | 0.0369(5)  |
| F9_7  | 0.54598(12) | 0.58754(8)  | 0.56282(8)  | 0.0332(4)  |
| O1_8  | 0.3423(9)   | 0.5750(4)   | 0.5964(5)   | 0.0169(18) |
| C1_8  | 0.2808(6)   | 0.6141(4)   | 0.6080(4)   | 0.0212(7)  |
| C2_8  | 0.2488(4)   | 0.6086(3)   | 0.6786(3)   | 0.0329(14) |
| F1_8  | 0.1912(2)   | 0.56729(13) | 0.68257(19) | 0.0525(12) |
| F2_8  | 0.2083(8)   | 0.6560(6)   | 0.6970(9)   | 0.040(2)   |
| F3_8  | 0.3135(4)   | 0.5985(4)   | 0.7187(4)   | 0.058(2)   |
| C3_8  | 0.3252(4)   | 0.6724(2)   | 0.5995(3)   | 0.0329(13) |
| F4_8  | 0.3744(6)   | 0.6731(6)   | 0.5494(4)   | 0.057(2)   |
| F5_8  | 0.3757(2)   | 0.68425(15) | 0.6510(2)   | 0.0541(11) |
| F6_8  | 0.2689(10)  | 0.7154(5)   | 0.5932(6)   | 0.044(2)   |
| C4_8  | 0.2037(4)   | 0.6098(3)   | 0.5600(3)   | 0.0360(16) |
| F7_8  | 0.2260(3)   | 0.62667(19) | 0.50193(14) | 0.0576(13) |
| F8_8  | 0.1355(11)  | 0.6409(7)   | 0.5798(8)   | 0.044(3)   |
| F9_8  | 0.1769(5)   | 0.5570(3)   | 0.5554(3)   | 0.060(2)   |
| C1_10 | 0.8090(2)   | 0.65356(16) | 0.48530(15) | 0.0358(8)  |
| C2_10 | 0.7983(3)   | 0.7002(2)   | 0.52323(17) | 0.0508(11) |

|        |             |             |             |            |
|--------|-------------|-------------|-------------|------------|
| C3_10  | 0.8619(3)   | 0.74204(19) | 0.52607(19) | 0.0608(12) |
| H3_10  | 0.855336    | 0.774478    | 0.552708    | 0.073      |
| C4_10  | 0.9336(3)   | 0.7356(2)   | 0.48995(18) | 0.0537(12) |
| H4_10  | 0.977070    | 0.764037    | 0.491129    | 0.064      |
| C5_10  | 0.9437(3)   | 0.68984(18) | 0.45293(18) | 0.0517(11) |
| H5_10  | 0.994414    | 0.685906    | 0.428337    | 0.062      |
| C6_10  | 0.8803(3)   | 0.64776(17) | 0.45011(18) | 0.0486(10) |
| H6_10  | 0.887518    | 0.615315    | 0.423567    | 0.058      |
| F1_10  | 0.74758(16) | 0.61360(11) | 0.48384(11) | 0.0643(7)  |
| F2_10  | 0.72754(19) | 0.70423(15) | 0.55860(13) | 0.0913(10) |
| N1_11  | 0.4626(2)   | 0.80211(13) | 0.68055(13) | 0.0409(8)  |
| C1_11  | 0.5101(2)   | 0.77021(14) | 0.66055(14) | 0.0309(8)  |
| C2_11  | 0.5702(2)   | 0.72944(15) | 0.63436(17) | 0.0393(9)  |
| H2A_11 | 0.567550    | 0.731124    | 0.587267    | 0.059      |
| H2B_11 | 0.554839    | 0.691133    | 0.648600    | 0.059      |
| H2C_11 | 0.628928    | 0.738512    | 0.649526    | 0.059      |
| N1_12  | 0.46803(18) | 0.88818(11) | 0.79896(12) | 0.0295(6)  |
| C1_12  | 0.5254(2)   | 0.90357(13) | 0.82862(14) | 0.0287(7)  |
| C2_12  | 0.5987(2)   | 0.92356(17) | 0.86765(18) | 0.0446(10) |
| H2A_12 | 0.647828    | 0.897920    | 0.862083    | 0.067      |
| H2B_12 | 0.582878    | 0.924222    | 0.913046    | 0.067      |
| H2C_12 | 0.614605    | 0.961941    | 0.854000    | 0.067      |
| N1_13  | 0.25519(18) | 0.90307(11) | 0.80259(12) | 0.0294(6)  |
| C1_13  | 0.2030(2)   | 0.92493(13) | 0.83095(14) | 0.0254(7)  |
| C2_13  | 0.1359(2)   | 0.95253(14) | 0.86691(15) | 0.0342(8)  |
| H2A_13 | 0.139743    | 0.993752    | 0.861027    | 0.051      |
| H2B_13 | 0.143070    | 0.943358    | 0.912680    | 0.051      |
| H2C_13 | 0.079276    | 0.939175    | 0.851373    | 0.051      |
| N1_14  | 0.2217(2)   | 0.81941(12) | 0.68085(12) | 0.0361(7)  |
| C1_14  | 0.1608(2)   | 0.80159(13) | 0.65750(14) | 0.0295(7)  |
| C2_14  | 0.0829(2)   | 0.77852(15) | 0.62725(17) | 0.0403(9)  |
| H2A_14 | 0.084467    | 0.784926    | 0.580711    | 0.060      |
| H2B_14 | 0.032242    | 0.797445    | 0.644821    | 0.060      |
| H2C_14 | 0.079659    | 0.737655    | 0.635842    | 0.060      |
| N1_15  | 0.34555(16) | 0.79579(11) | 0.78254(11) | 0.0242(6)  |
| C1_15  | 0.3450(2)   | 0.75470(14) | 0.80995(14) | 0.0309(8)  |
| C2_15  | 0.3438(3)   | 0.70114(16) | 0.8446(2)   | 0.0560(12) |
| H2A_15 | 0.308517    | 0.673576    | 0.820530    | 0.084      |
| H2B_15 | 0.319212    | 0.707085    | 0.887185    | 0.084      |
| H2C_15 | 0.402849    | 0.686643    | 0.849615    | 0.084      |
| O1_16  | 0.2761(11)  | 0.8152(13)  | 0.3478(15)  | 0.017(4)   |
| C1_16  | 0.2004(10)  | 0.7937(6)   | 0.3686(7)   | 0.024(4)   |
| C2_16  | 0.1531(5)   | 0.8397(3)   | 0.4072(4)   | 0.034(2)   |
| F1_16  | 0.1860(9)   | 0.8460(4)   | 0.4652(5)   | 0.044(2)   |
| F2_16  | 0.0686(8)   | 0.8270(7)   | 0.4134(5)   | 0.046(3)   |
| F3_16  | 0.156(2)    | 0.8900(8)   | 0.3788(14)  | 0.043(4)   |
| C3_16  | 0.1437(5)   | 0.7746(3)   | 0.3109(4)   | 0.033(2)   |
| F4_16  | 0.1869(19)  | 0.7474(12)  | 0.2668(10)  | 0.039(4)   |
| F5_16  | 0.1073(11)  | 0.8187(4)   | 0.2813(6)   | 0.041(2)   |
| F6_16  | 0.0791(6)   | 0.7402(4)   | 0.3295(6)   | 0.048(2)   |
| C4_16  | 0.2207(5)   | 0.7415(4)   | 0.4130(4)   | 0.034(2)   |
| F7_16  | 0.2407(7)   | 0.6966(4)   | 0.3790(4)   | 0.0397(19) |
| F8_16  | 0.1537(17)  | 0.7284(10)  | 0.4497(13)  | 0.039(4)   |
| F9_16  | 0.2891(16)  | 0.7545(14)  | 0.4498(17)  | 0.043(4)   |
| O1_17  | 0.3341(19)  | 0.5710(9)   | 0.5988(13)  | 0.030(5)   |

|       |            |            |            |           |
|-------|------------|------------|------------|-----------|
| C1_17 | 0.2780(12) | 0.6146(8)  | 0.6055(7)  | 0.0212(7) |
| C2_17 | 0.3057(7)  | 0.6655(5)  | 0.5640(5)  | 0.033(2)  |
| F1_17 | 0.2891(6)  | 0.6556(3)  | 0.5021(2)  | 0.042(2)  |
| F2_17 | 0.263(2)   | 0.7129(11) | 0.5790(12) | 0.036(3)  |
| F3_17 | 0.3892(11) | 0.6756(11) | 0.5679(9)  | 0.043(4)  |
| C3_17 | 0.2770(9)  | 0.6327(5)  | 0.6772(5)  | 0.033(3)  |
| F4_17 | 0.2793(10) | 0.5883(6)  | 0.7149(7)  | 0.048(4)  |
| F5_17 | 0.3481(5)  | 0.6639(3)  | 0.6917(4)  | 0.050(2)  |
| F6_17 | 0.2120(18) | 0.6666(12) | 0.6930(19) | 0.043(5)  |
| C4_17 | 0.1870(8)  | 0.5949(6)  | 0.5832(5)  | 0.029(3)  |
| F7_17 | 0.1524(4)  | 0.5617(3)  | 0.6267(4)  | 0.050(2)  |
| F8_17 | 0.134(2)   | 0.6386(14) | 0.5703(16) | 0.034(4)  |
| F9_17 | 0.1907(11) | 0.5633(7)  | 0.5298(5)  | 0.044(3)  |
| O1_18 | 0.364(3)   | 0.8925(16) | 0.4202(16) | 0.016(5)  |
| C1_18 | 0.4024(12) | 0.9201(9)  | 0.4694(11) | 0.025(5)  |
| C2_18 | 0.4968(10) | 0.9362(7)  | 0.4542(7)  | 0.034(4)  |
| F1_18 | 0.5493(5)  | 0.8919(4)  | 0.4640(5)  | 0.044(3)  |
| F2_18 | 0.529(3)   | 0.9781(16) | 0.490(2)   | 0.030(4)  |
| F3_18 | 0.5012(13) | 0.9510(8)  | 0.3939(7)  | 0.049(5)  |
| C3_18 | 0.3468(10) | 0.9746(7)  | 0.4757(8)  | 0.045(4)  |
| F4_18 | 0.2648(10) | 0.9598(8)  | 0.4780(9)  | 0.045(4)  |
| F5_18 | 0.3648(10) | 1.0100(4)  | 0.4280(5)  | 0.056(3)  |
| F6_18 | 0.365(3)   | 1.0032(16) | 0.5302(14) | 0.044(5)  |
| C4_18 | 0.4013(11) | 0.8847(7)  | 0.5320(8)  | 0.038(4)  |
| F7_18 | 0.3207(7)  | 0.8835(5)  | 0.5566(4)  | 0.048(3)  |
| F8_18 | 0.454(3)   | 0.908(2)   | 0.5759(17) | 0.049(6)  |
| F9_18 | 0.4271(11) | 0.8324(6)  | 0.5225(7)  | 0.045(4)  |
| O1_19 | 0.421(3)   | 0.8723(18) | 0.2942(13) | 0.019(7)  |
| C1_19 | 0.4022(11) | 0.9035(8)  | 0.2412(10) | 0.018(4)  |
| C2_19 | 0.3930(10) | 0.8632(6)  | 0.1812(6)  | 0.033(3)  |
| F1_19 | 0.4707(8)  | 0.8477(5)  | 0.1615(4)  | 0.051(3)  |
| F2_19 | 0.360(2)   | 0.8925(16) | 0.1320(14) | 0.039(5)  |
| F3_19 | 0.3498(14) | 0.8169(8)  | 0.1951(12) | 0.039(4)  |
| C3_19 | 0.3159(10) | 0.9361(7)  | 0.2485(7)  | 0.034(4)  |
| F4_19 | 0.3091(10) | 0.9561(8)  | 0.3074(7)  | 0.044(4)  |
| F5_19 | 0.2484(5)  | 0.9032(5)  | 0.2376(5)  | 0.051(3)  |
| F6_19 | 0.309(3)   | 0.9814(13) | 0.2099(15) | 0.031(4)  |
| C4_19 | 0.4755(11) | 0.9470(6)  | 0.2310(8)  | 0.040(4)  |
| F7_19 | 0.4668(8)  | 0.9900(4)  | 0.2716(4)  | 0.055(3)  |
| F8_19 | 0.478(3)   | 0.9680(13) | 0.1714(11) | 0.032(4)  |
| F9_19 | 0.5515(12) | 0.9226(9)  | 0.2418(10) | 0.056(5)  |
| O1_20 | 0.296(3)   | 0.4580(14) | 0.6235(17) | 0.039(9)  |
| C1_20 | 0.2686(13) | 0.4110(9)  | 0.6533(9)  | 0.027(5)  |
| C2_20 | 0.1688(12) | 0.4145(8)  | 0.6520(9)  | 0.044(5)  |
| F1_20 | 0.144(3)   | 0.4459(17) | 0.7024(14) | 0.051(6)  |
| F2_20 | 0.1376(13) | 0.3616(7)  | 0.6598(14) | 0.074(7)  |
| F3_20 | 0.1368(13) | 0.4335(10) | 0.5968(9)  | 0.056(5)  |
| C3_20 | 0.2974(14) | 0.3579(9)  | 0.6157(10) | 0.049(5)  |
| F4_20 | 0.3789(14) | 0.3650(13) | 0.6008(11) | 0.053(5)  |
| F5_20 | 0.251(2)   | 0.3503(13) | 0.5617(12) | 0.056(6)  |
| F6_20 | 0.2883(19) | 0.3112(9)  | 0.6501(9)  | 0.039(5)  |
| C4_20 | 0.3023(15) | 0.4076(9)  | 0.7242(9)  | 0.051(5)  |
| F7_20 | 0.3860(16) | 0.3979(14) | 0.724(2)   | 0.060(6)  |
| F8_20 | 0.2555(14) | 0.3702(7)  | 0.7572(6)  | 0.057(5)  |
| F9_20 | 0.2924(16) | 0.4593(8)  | 0.7496(10) | 0.062(5)  |

Table S 10 Atomic coordinates and  $U_{eq}$  [ $\text{\AA}^2$ ] for 6

| Atom | x           | y           | z           | $U_{eq}$    |
|------|-------------|-------------|-------------|-------------|
| Sn1  | 0.83077(2)  | 0.47786(2)  | 0.24364(2)  | 0.02791(6)  |
| N1   | 0.73727(17) | 0.65634(16) | 0.28577(9)  | 0.0247(4)   |
| C1   | 0.8434(2)   | 0.73050(18) | 0.27964(11) | 0.0249(5)   |
| H1   | 0.840826    | 0.797144    | 0.287171    | 0.030       |
| Al1  | 0.36941(5)  | 0.72087(5)  | 0.13125(3)  | 0.01629(13) |
| C2   | 0.6498(2)   | 0.6734(2)   | 0.29861(11) | 0.0309(5)   |
| H2   | 0.646505    | 0.735943    | 0.304109    | 0.037       |
| N2   | 0.71412(17) | 0.55816(16) | 0.28117(10) | 0.0278(4)   |
| Al2  | 0.12559(5)  | 0.25584(5)  | 0.37722(3)  | 0.01819(13) |
| C3   | 0.5675(2)   | 0.5842(2)   | 0.30216(12) | 0.0358(6)   |
| H3   | 0.495806    | 0.571737    | 0.310319    | 0.043       |
| N3   | 0.86638(16) | 0.69983(16) | 0.21869(9)  | 0.0244(4)   |
| N2A  | 0.7191(2)   | 0.37118(17) | 0.29898(10) | 0.0329(5)   |
| C2A  | 0.5923(3)   | 0.2344(3)   | 0.31876(14) | 0.0386(6)   |
| H2A  | 0.534667    | 0.167056    | 0.313011    | 0.046       |
| N3A  | 0.58578(16) | 0.26971(16) | 0.17683(9)  | 0.0253(4)   |
| C3A  | 0.6449(3)   | 0.3106(3)   | 0.37252(14) | 0.0451(7)   |
| H3A  | 0.630981    | 0.307636    | 0.411617    | 0.054       |
| N4A  | 0.65748(18) | 0.36695(16) | 0.17836(10) | 0.0276(4)   |
| C4A  | 0.7232(3)   | 0.3937(3)   | 0.35864(13) | 0.0402(7)   |
| H4A  | 0.773068    | 0.458134    | 0.387744    | 0.048       |
| N5A  | 0.70561(17) | 0.20017(15) | 0.18913(10) | 0.0252(4)   |
| C5A  | 0.4888(2)   | 0.2333(2)   | 0.14160(11) | 0.0302(5)   |
| H5A  | 0.426793    | 0.167512    | 0.133515    | 0.036       |
| N6A  | 0.80492(17) | 0.28295(16) | 0.19484(10) | 0.0286(4)   |
| C6A  | 0.4970(2)   | 0.3089(2)   | 0.11991(12) | 0.0334(6)   |
| H6A  | 0.442090    | 0.306687    | 0.094149    | 0.040       |
| C7A  | 0.6025(2)   | 0.3901(2)   | 0.14342(12) | 0.0321(5)   |
| H7A  | 0.631625    | 0.453522    | 0.135649    | 0.039       |
| C8A  | 0.7080(2)   | 0.10946(18) | 0.16269(11) | 0.0271(5)   |
| H8A  | 0.648519    | 0.041949    | 0.153905    | 0.033       |
| C9A  | 0.8123(2)   | 0.1338(2)   | 0.15114(11) | 0.0292(5)   |
| H9A  | 0.840486    | 0.087376    | 0.132965    | 0.035       |
| C10A | 0.8689(2)   | 0.24213(19) | 0.17185(11) | 0.0270(5)   |
| H10A | 0.944110    | 0.281410    | 0.169631    | 0.032       |
| C1A  | 0.6150(2)   | 0.21679(19) | 0.20997(11) | 0.0265(5)   |
| H1A  | 0.550224    | 0.147370    | 0.202088    | 0.032       |
| C10  | 1.0331(2)   | 0.7157(2)   | 0.36971(13) | 0.0349(6)   |
| H10  | 1.065375    | 0.679470    | 0.381895    | 0.042       |
| C9   | 1.0694(2)   | 0.8214(2)   | 0.39576(13) | 0.0356(6)   |
| H9   | 1.128704    | 0.869401    | 0.427686    | 0.043       |
| C8   | 1.0013(2)   | 0.8412(2)   | 0.36551(12) | 0.0303(5)   |
| H8   | 1.004069    | 0.906566    | 0.372179    | 0.036       |
| C7   | 0.8845(2)   | 0.6033(2)   | 0.13691(12) | 0.0324(6)   |
| H7   | 0.880467    | 0.544633    | 0.105899    | 0.039       |
| C6   | 0.9330(2)   | 0.7022(2)   | 0.13469(13) | 0.0361(6)   |
| H6   | 0.967498    | 0.723837    | 0.102996    | 0.043       |
| N6   | 0.94815(19) | 0.67124(17) | 0.32577(10) | 0.0322(5)   |
| N5   | 0.92895(17) | 0.74981(16) | 0.32416(9)  | 0.0260(4)   |
| C5   | 0.9213(2)   | 0.7625(2)   | 0.18733(12) | 0.0307(5)   |

|      |             |             |              |            |
|------|-------------|-------------|--------------|------------|
| H5   | 0.946948    | 0.835073    | 0.199705     | 0.037      |
| N4   | 0.84399(18) | 0.60044(17) | 0.18808(10)  | 0.0289(4)  |
| C4   | 0.6106(2)   | 0.5150(2)   | 0.29129(12)  | 0.0336(6)  |
| H4   | 0.571462    | 0.445970    | 0.291103     | 0.040      |
| N1A  | 0.63718(18) | 0.27230(17) | 0.27464(10)  | 0.0293(4)  |
| O1_1 | 0.50560(14) | 0.74785(14) | 0.13699(8)   | 0.0290(4)  |
| C1_1 | 0.58245(18) | 0.72701(17) | 0.10950(10)  | 0.0215(4)  |
| C2_1 | 0.6968(2)   | 0.81566(19) | 0.14488(12)  | 0.0295(5)  |
| F1_1 | 0.71743(12) | 0.80482(12) | 0.19749(7)   | 0.0334(3)  |
| F2_1 | 0.77874(12) | 0.81813(13) | 0.11413(8)   | 0.0389(4)  |
| F3_1 | 0.69888(14) | 0.90655(12) | 0.15776(9)   | 0.0451(4)  |
| C3_1 | 0.5738(2)   | 0.7224(2)   | 0.04280(12)  | 0.0314(5)  |
| F4_1 | 0.46990(13) | 0.66500(14) | 0.01538(7)   | 0.0372(4)  |
| F5_1 | 0.60788(16) | 0.81678(15) | 0.04014(9)   | 0.0494(4)  |
| F6_1 | 0.63295(14) | 0.68229(15) | 0.01098(7)   | 0.0417(4)  |
| C4_1 | 0.5716(2)   | 0.62255(18) | 0.11121(11)  | 0.0265(5)  |
| F7_1 | 0.49162(13) | 0.54273(11) | 0.06857(7)   | 0.0352(3)  |
| F8_1 | 0.66454(13) | 0.61524(12) | 0.10305(8)   | 0.0358(3)  |
| F9_1 | 0.54765(14) | 0.61126(12) | 0.16385(7)   | 0.0383(4)  |
| O1_2 | 0.3466(3)   | 0.7737(3)   | 0.08226(11)  | 0.0727(10) |
| C1_2 | 0.3041(2)   | 0.81611(19) | 0.05507(10)  | 0.0257(5)  |
| C2_2 | 0.2136(3)   | 0.7323(2)   | 0.00187(13)  | 0.0463(7)  |
| F1_2 | 0.12283(18) | 0.68012(16) | 0.02248(10)  | 0.0664(6)  |
| F2_2 | 0.18863(19) | 0.7710(2)   | -0.03561(9)  | 0.0697(7)  |
| F3_2 | 0.2450(2)   | 0.66476(15) | -0.03007(11) | 0.0866(9)  |
| C3_2 | 0.3959(2)   | 0.8927(2)   | 0.03077(13)  | 0.0408(6)  |
| F4_2 | 0.48549(16) | 0.9510(3)   | 0.07120(10)  | 0.0940(10) |
| F5_2 | 0.42240(16) | 0.84258(16) | -0.01836(8)  | 0.0473(4)  |
| F6_2 | 0.36562(19) | 0.95628(15) | 0.01628(11)  | 0.0621(6)  |
| C4_2 | 0.2539(2)   | 0.8760(2)   | 0.10064(12)  | 0.0331(5)  |
| F7_2 | 0.33323(19) | 0.96519(17) | 0.13764(10)  | 0.0718(7)  |
| F8_2 | 0.18717(18) | 0.89699(18) | 0.07352(10)  | 0.0565(5)  |
| F9_2 | 0.19728(13) | 0.82197(13) | 0.13435(7)   | 0.0371(4)  |
| O1_3 | 0.2918(2)   | 0.59090(15) | 0.10675(13)  | 0.0679(9)  |
| C1_3 | 0.2030(2)   | 0.50215(18) | 0.10216(11)  | 0.0284(5)  |
| C2_3 | 0.1595(3)   | 0.4393(2)   | 0.03420(12)  | 0.0372(6)  |
| F1_3 | 0.10519(19) | 0.47757(16) | 0.01077(8)   | 0.0541(5)  |
| F2_3 | 0.09007(16) | 0.33988(12) | 0.02426(8)   | 0.0497(5)  |
| F3_3 | 0.24096(19) | 0.44344(16) | 0.00360(8)   | 0.0547(5)  |
| C3_3 | 0.2349(2)   | 0.4391(2)   | 0.13178(13)  | 0.0393(6)  |
| F4_3 | 0.29937(18) | 0.4994(2)   | 0.18405(9)   | 0.0777(8)  |
| F5_3 | 0.28922(14) | 0.39597(15) | 0.09697(8)   | 0.0447(4)  |
| F6_3 | 0.14718(16) | 0.36332(17) | 0.14101(10)  | 0.0539(5)  |
| C4_3 | 0.1124(2)   | 0.5228(2)   | 0.13367(12)  | 0.0319(5)  |
| F7_3 | 0.13314(14) | 0.54827(15) | 0.19306(7)   | 0.0461(4)  |
| F8_3 | 0.01269(12) | 0.44094(12) | 0.11437(8)   | 0.0398(4)  |
| F9_3 | 0.10773(16) | 0.60132(13) | 0.12334(9)   | 0.0470(4)  |
| O1_4 | 0.3371(10)  | 0.7637(7)   | 0.2040(4)    | 0.0179(16) |
| C1_4 | 0.3745(7)   | 0.8293(7)   | 0.2615(5)    | 0.0226(19) |
| C2_4 | 0.2735(5)   | 0.8206(4)   | 0.2924(2)    | 0.0293(12) |
| F1_4 | 0.2289(4)   | 0.7341(3)   | 0.30553(19)  | 0.0450(11) |
| F2_4 | 0.2998(14)  | 0.9012(8)   | 0.3442(4)    | 0.0375(19) |
| F3_4 | 0.1972(10)  | 0.8202(11)  | 0.2576(8)    | 0.0392(18) |
| C3_4 | 0.4461(4)   | 0.9428(4)   | 0.2649(2)    | 0.0292(12) |
| F4_4 | 0.5138(10)  | 0.9476(8)   | 0.2240(5)    | 0.0332(17) |

|      |             |             |             |            |
|------|-------------|-------------|-------------|------------|
| F5_4 | 0.3835(4)   | 0.9833(3)   | 0.2527(2)   | 0.0393(9)  |
| F6_4 | 0.5071(8)   | 1.0038(8)   | 0.3189(4)   | 0.0405(18) |
| C4_4 | 0.4453(5)   | 0.7971(5)   | 0.2939(3)   | 0.0330(13) |
| F7_4 | 0.5452(3)   | 0.8289(4)   | 0.27779(16) | 0.0376(9)  |
| F8_4 | 0.4587(11)  | 0.8380(10)  | 0.3541(4)   | 0.043(2)   |
| F9_4 | 0.4001(6)   | 0.6959(5)   | 0.2797(3)   | 0.0424(12) |
| O1_5 | 0.1291(4)   | 0.3752(2)   | 0.3972(2)   | 0.0238(9)  |
| C1_5 | 0.1720(3)   | 0.4691(3)   | 0.39096(15) | 0.0231(8)  |
| C2_5 | 0.1272(3)   | 0.5347(2)   | 0.43609(14) | 0.0316(6)  |
| F1_5 | 0.02336(16) | 0.50614(15) | 0.41583(11) | 0.0481(5)  |
| F2_5 | 0.1856(3)   | 0.6357(2)   | 0.44464(17) | 0.0402(7)  |
| F3_5 | 0.12886(19) | 0.52214(14) | 0.48904(9)  | 0.0401(5)  |
| C3_5 | 0.2996(2)   | 0.5254(2)   | 0.40614(14) | 0.0311(6)  |
| F4_5 | 0.33962(19) | 0.46048(19) | 0.38133(13) | 0.0425(6)  |
| F5_5 | 0.33188(15) | 0.56025(15) | 0.46547(9)  | 0.0413(5)  |
| F6_5 | 0.3466(4)   | 0.6057(2)   | 0.3867(2)   | 0.0405(8)  |
| C4_5 | 0.1365(3)   | 0.4597(3)   | 0.32584(14) | 0.0421(8)  |
| F7_5 | 0.1994(2)   | 0.43247(17) | 0.28837(9)  | 0.0599(7)  |
| F8_5 | 0.1452(4)   | 0.5475(3)   | 0.3218(2)   | 0.0526(7)  |
| F9_5 | 0.0333(2)   | 0.3880(2)   | 0.30502(12) | 0.0653(8)  |
| O1_6 | 0.1577(12)  | 0.2281(10)  | 0.3033(6)   | 0.0194(16) |
| C1_6 | 0.1951(5)   | 0.1718(5)   | 0.2621(3)   | 0.0238(13) |
| C2_6 | 0.3127(3)   | 0.1962(3)   | 0.28599(19) | 0.0291(9)  |
| F1_6 | 0.3109(3)   | 0.1480(3)   | 0.32467(11) | 0.0350(7)  |
| F2_6 | 0.3637(12)  | 0.1647(10)  | 0.2417(5)   | 0.0367(15) |
| F3_6 | 0.3746(9)   | 0.2977(6)   | 0.3139(4)   | 0.0416(16) |
| C3_6 | 0.1963(4)   | 0.2008(3)   | 0.20415(18) | 0.0345(10) |
| F4_6 | 0.1039(10)  | 0.2029(9)   | 0.1904(8)   | 0.0439(16) |
| F5_6 | 0.2804(3)   | 0.2930(3)   | 0.21208(16) | 0.0445(8)  |
| F6_6 | 0.2070(4)   | 0.1329(4)   | 0.1563(2)   | 0.0470(11) |
| C4_6 | 0.1174(3)   | 0.0544(3)   | 0.24656(19) | 0.0321(9)  |
| F7_6 | 0.0238(4)   | 0.0251(4)   | 0.2115(2)   | 0.0450(10) |
| F8_6 | 0.1614(10)  | -0.0048(7)  | 0.2169(3)   | 0.0424(17) |
| F9_6 | 0.0908(8)   | 0.0323(11)  | 0.2967(6)   | 0.0403(14) |
| O1_7 | -0.0037(17) | 0.173(3)    | 0.3801(18)  | 0.023(5)   |
| C1_7 | -0.1130(17) | 0.1344(12)  | 0.3744(6)   | 0.024(3)   |
| C2_7 | -0.1468(14) | 0.2011(10)  | 0.4266(6)   | 0.029(3)   |
| F1_7 | -0.0818(8)  | 0.3001(7)   | 0.4379(5)   | 0.041(3)   |
| F2_7 | -0.2510(15) | 0.175(2)    | 0.4097(12)  | 0.043(4)   |
| F3_7 | -0.1332(8)  | 0.1872(8)   | 0.4790(4)   | 0.038(2)   |
| C3_7 | -0.1687(15) | 0.0229(11)  | 0.3767(6)   | 0.031(4)   |
| F4_7 | -0.1690(8)  | -0.0426(7)  | 0.3239(5)   | 0.050(3)   |
| F5_7 | -0.1153(7)  | 0.0158(7)   | 0.4202(5)   | 0.039(3)   |
| F6_7 | -0.2720(17) | -0.007(3)   | 0.3861(16)  | 0.041(4)   |
| C4_7 | -0.1618(13) | 0.1301(11)  | 0.3133(6)   | 0.031(3)   |
| F7_7 | -0.1091(8)  | 0.1027(9)   | 0.2702(4)   | 0.035(2)   |
| F8_7 | -0.2665(12) | 0.0579(11)  | 0.2961(9)   | 0.050(3)   |
| F9_7 | -0.1428(9)  | 0.2272(8)   | 0.3183(5)   | 0.053(3)   |
| O1_8 | 0.2232(6)   | 0.2550(6)   | 0.4230(2)   | 0.0250(13) |
| C1_8 | 0.2554(3)   | 0.2591(3)   | 0.47829(19) | 0.0225(8)  |
| C2_8 | 0.1969(3)   | 0.1501(3)   | 0.48398(16) | 0.0372(8)  |
| F1_8 | 0.09358(18) | 0.1256(2)   | 0.49297(13) | 0.0526(7)  |
| F2_8 | 0.2455(4)   | 0.1429(4)   | 0.52995(18) | 0.0536(9)  |
| F3_8 | 0.1955(3)   | 0.0788(3)   | 0.4338(2)   | 0.0585(9)  |
| C3_8 | 0.3815(3)   | 0.2978(3)   | 0.48565(16) | 0.0346(7)  |

|       |             |             |             |            |
|-------|-------------|-------------|-------------|------------|
| F4_8  | 0.4320(3)   | 0.3793(2)   | 0.46778(17) | 0.0453(7)  |
| F5_8  | 0.40393(19) | 0.2233(2)   | 0.45201(11) | 0.0469(6)  |
| F6_8  | 0.4250(5)   | 0.3242(5)   | 0.5426(2)   | 0.0497(10) |
| C4_8  | 0.2295(3)   | 0.3339(3)   | 0.52912(14) | 0.0363(8)  |
| F7_8  | 0.3022(3)   | 0.43208(17) | 0.53762(11) | 0.0585(7)  |
| F8_8  | 0.2326(4)   | 0.3212(3)   | 0.58239(16) | 0.0458(10) |
| F9_8  | 0.1291(3)   | 0.3216(3)   | 0.5142(2)   | 0.0503(10) |
| C1_9  | 0.0884(8)   | 0.0967(7)   | 0.0181(4)   | 0.048(2)   |
| C2_9  | 0.1051(7)   | 0.0117(7)   | -0.0034(4)  | 0.047(2)   |
| C3_9  | 0.0203(12)  | -0.0891(11) | -0.0206(8)  | 0.123(7)   |
| H3_9  | 0.031734    | -0.147435   | -0.038934   | 0.148      |
| C4_9  | -0.0815(13) | -0.0985(11) | -0.0093(10) | 0.127(7)   |
| H4_9  | -0.140454   | -0.165220   | -0.014904   | 0.152      |
| C5_9  | -0.0996(13) | -0.0164(10) | 0.0093(10)  | 0.137(7)   |
| H5_9  | -0.172246   | -0.027166   | 0.013648    | 0.165      |
| C6_9  | -0.0168(8)  | 0.0832(6)   | 0.0225(4)   | 0.046(2)   |
| H6_9  | -0.031670   | 0.140444    | 0.034262    | 0.055      |
| F1_9  | 0.1696(5)   | 0.1836(5)   | 0.0363(4)   | 0.108(2)   |
| F2_9  | 0.2002(5)   | 0.0252(5)   | -0.0037(3)  | 0.0993(19) |
| C1_10 | 0.4646(8)   | -0.0997(7)  | 0.4993(4)   | 0.042(2)   |
| C2_10 | 0.3894(6)   | -0.0753(6)  | 0.4791(3)   | 0.0310(15) |
| C3_10 | 0.4219(6)   | 0.0230(6)   | 0.4793(3)   | 0.0343(15) |
| H3_10 | 0.370037    | 0.039505    | 0.464848    | 0.041      |
| C4_10 | 0.5255(11)  | 0.0957(12)  | 0.4996(10)  | 0.114(7)   |
| H4_10 | 0.546611    | 0.164869    | 0.501953    | 0.137      |
| C5_10 | 0.5996(13)  | 0.0708(14)  | 0.5166(9)   | 0.118(6)   |
| H5_10 | 0.673852    | 0.122594    | 0.530194    | 0.142      |
| C6_10 | 0.5709(12)  | -0.0268(13) | 0.5148(10)  | 0.134(7)   |
| H6_10 | 0.625650    | -0.044028   | 0.524392    | 0.161      |
| F1_10 | 0.4326(4)   | -0.1863(4)  | 0.5025(3)   | 0.0851(16) |
| F2_10 | 0.2907(4)   | -0.1422(4)  | 0.4607(2)   | 0.0732(13) |
| O1_11 | 0.3531(9)   | 0.7872(6)   | 0.1985(4)   | 0.0195(15) |
| C1_11 | 0.3870(6)   | 0.8353(6)   | 0.2585(4)   | 0.0197(16) |
| C2_11 | 0.5063(4)   | 0.9246(4)   | 0.2709(2)   | 0.0275(10) |
| F1_11 | 0.5188(10)  | 0.9747(7)   | 0.2315(5)   | 0.042(2)   |
| F2_11 | 0.5321(7)   | 0.9951(7)   | 0.3259(3)   | 0.0343(14) |
| F3_11 | 0.5791(3)   | 0.8887(3)   | 0.26504(15) | 0.0408(9)  |
| C3_11 | 0.3870(6)   | 0.7613(5)   | 0.2918(3)   | 0.0416(14) |
| F4_11 | 0.2863(4)   | 0.7022(3)   | 0.2985(2)   | 0.0709(16) |
| F5_11 | 0.4253(6)   | 0.6995(5)   | 0.2583(3)   | 0.0574(15) |
| F6_11 | 0.4471(11)  | 0.8108(9)   | 0.3460(4)   | 0.051(2)   |
| C4_11 | 0.3102(4)   | 0.8818(5)   | 0.2850(2)   | 0.0347(12) |
| F7_11 | 0.2059(8)   | 0.8121(11)  | 0.2628(7)   | 0.048(2)   |
| F8_11 | 0.3224(13)  | 0.9091(10)  | 0.3451(4)   | 0.053(3)   |
| F9_11 | 0.3324(4)   | 0.9642(3)   | 0.2694(2)   | 0.0512(11) |
| O1_12 | 0.146(2)    | 0.2137(18)  | 0.3062(11)  | 0.023(4)   |
| C1_12 | 0.1832(8)   | 0.1579(8)   | 0.2647(5)   | 0.021(2)   |
| C2_12 | 0.1172(6)   | 0.1229(6)   | 0.2013(3)   | 0.0365(17) |
| F1_12 | 0.1042(19)  | 0.1999(16)  | 0.1940(14)  | 0.045(3)   |
| F2_12 | 0.1667(8)   | 0.0915(6)   | 0.1568(4)   | 0.0494(19) |
| F3_12 | 0.0176(7)   | 0.0449(7)   | 0.1951(4)   | 0.0488(19) |
| C3_12 | 0.1692(6)   | 0.0608(5)   | 0.2793(3)   | 0.0292(15) |
| F4_12 | 0.2483(5)   | 0.0849(5)   | 0.3220(2)   | 0.0412(13) |
| F5_12 | 0.0729(13)  | 0.018(2)    | 0.2978(10)  | 0.040(3)   |
| F6_12 | 0.1692(18)  | -0.0117(13) | 0.2307(5)   | 0.036(2)   |



|       |              |              |             |            |
|-------|--------------|--------------|-------------|------------|
| C4_12 | 0.3067(6)    | 0.2255(6)    | 0.2641(4)   | 0.0369(17) |
| F7_12 | 0.3638(15)   | 0.2765(10)   | 0.3197(6)   | 0.040(3)   |
| F8_12 | 0.353(2)     | 0.1672(18)   | 0.2341(10)  | 0.040(3)   |
| F9_12 | 0.3228(6)    | 0.2937(4)    | 0.2372(3)   | 0.0522(15) |
| O1_13 | 0.222(3)     | 0.256(3)     | 0.4234(12)  | 0.029(8)   |
| C1_13 | 0.2553(12)   | 0.2552(11)   | 0.4772(9)   | 0.032(4)   |
| C2_13 | 0.1777(11)   | 0.2710(12)   | 0.5223(7)   | 0.047(3)   |
| F1_13 | 0.0842(11)   | 0.1867(14)   | 0.5102(7)   | 0.077(4)   |
| F2_13 | 0.223(2)     | 0.2886(18)   | 0.5776(8)   | 0.045(4)   |
| F3_13 | 0.1616(19)   | 0.3494(16)   | 0.5208(14)  | 0.054(4)   |
| C3_13 | 0.3736(12)   | 0.3446(11)   | 0.5028(7)   | 0.047(4)   |
| F4_13 | 0.4323(16)   | 0.3423(15)   | 0.4581(9)   | 0.056(5)   |
| F5_13 | 0.3735(15)   | 0.4343(9)    | 0.5233(7)   | 0.074(5)   |
| F6_13 | 0.420(3)     | 0.338(3)     | 0.5495(12)  | 0.062(5)   |
| C4_13 | 0.2532(14)   | 0.1497(12)   | 0.4688(8)   | 0.061(4)   |
| F7_13 | 0.3338(17)   | 0.1445(16)   | 0.4409(8)   | 0.092(5)   |
| F8_13 | 0.269(2)     | 0.138(3)     | 0.5209(10)  | 0.071(5)   |
| F9_13 | 0.1571(16)   | 0.0763(17)   | 0.4355(12)  | 0.076(5)   |
| O1_14 | -0.0017(4)   | 0.1658(7)    | 0.3857(4)   | 0.0205(11) |
| C1_14 | -0.1110(4)   | 0.1350(3)    | 0.37678(17) | 0.0236(9)  |
| C2_14 | -0.1525(4)   | 0.1076(4)    | 0.3092(2)   | 0.0427(11) |
| F1_14 | -0.15832(19) | 0.0181(2)    | 0.27631(10) | 0.0605(8)  |
| F2_14 | -0.2530(3)   | 0.1022(3)    | 0.30089(18) | 0.0501(9)  |
| F3_14 | -0.08425(19) | 0.1791(3)    | 0.28797(12) | 0.0555(8)  |
| C3_14 | -0.1389(4)   | 0.2200(3)    | 0.4163(2)   | 0.0367(10) |
| F4_14 | -0.07897(19) | 0.26558(19)  | 0.47057(11) | 0.0506(7)  |
| F5_14 | -0.11796(19) | 0.29255(18)  | 0.39180(16) | 0.0567(8)  |
| F6_14 | -0.2446(3)   | 0.1827(5)    | 0.4239(2)   | 0.0416(10) |
| C4_14 | -0.1683(4)   | 0.0379(3)    | 0.39586(18) | 0.0291(8)  |
| F7_14 | -0.15066(17) | 0.06383(18)  | 0.45526(10) | 0.0422(6)  |
| F8_14 | -0.2765(4)   | -0.0151(7)   | 0.3771(3)   | 0.0405(12) |
| F9_14 | -0.12774(19) | -0.02809(16) | 0.37276(14) | 0.0495(7)  |
| O1_15 | 0.130(3)     | 0.371(2)     | 0.390(2)    | 0.026(9)   |
| C1_15 | 0.1687(14)   | 0.4645(18)   | 0.3842(7)   | 0.028(9)   |
| C2_15 | 0.2870(14)   | 0.5000(15)   | 0.3686(8)   | 0.034(5)   |
| F1_15 | 0.2853(14)   | 0.4522(13)   | 0.3109(6)   | 0.039(4)   |
| F2_15 | 0.338(4)     | 0.6013(16)   | 0.379(2)    | 0.045(5)   |
| F3_15 | 0.344(2)     | 0.479(2)     | 0.4031(10)  | 0.047(5)   |
| C3_15 | 0.1728(14)   | 0.5457(16)   | 0.4440(7)   | 0.036(7)   |
| F4_15 | 0.0797(14)   | 0.5075(15)   | 0.4657(9)   | 0.041(4)   |
| F5_15 | 0.2562(13)   | 0.5729(13)   | 0.4856(7)   | 0.044(5)   |
| F6_15 | 0.185(3)     | 0.631(2)     | 0.4336(17)  | 0.043(5)   |
| C4_15 | 0.0933(14)   | 0.4600(17)   | 0.3330(8)   | 0.044(8)   |
| F7_15 | 0.0010(12)   | 0.4569(13)   | 0.3516(7)   | 0.040(4)   |
| F8_15 | 0.142(3)     | 0.545(2)     | 0.318(2)    | 0.059(5)   |
| F9_15 | 0.0724(17)   | 0.3779(15)   | 0.2851(8)   | 0.043(4)   |

Table S 11 Atomic coordinates and  $U_{eq}$  [ $\text{\AA}^2$ ] for **7 vap dif**.

| Atom | x          | y          | z          | $U_{eq}$  |
|------|------------|------------|------------|-----------|
| Fe1  | 0.23422(2) | 0.04901(2) | 0.83362(2) | 0.0537(2) |
| O1   | 0.1702(3)  | 0.0847(3)  | 0.8301(3)  | 0.064(2)  |
| C1   | 0.1930(3)  | 0.0719(3)  | 0.8303(3)  | 0.048(2)  |
| C2   | 0.2695(8)  | 0.0536(9)  | 0.8843(6)  | 0.094(7)  |

|      |             |             |             |            |
|------|-------------|-------------|-------------|------------|
| O2   | 0.2890(7)   | 0.0557(8)   | 0.9128(6)   | 0.124(7)   |
| C3   | 0.227(4)    | 0.075(4)    | 0.885(2)    | 0.49(7)    |
| O3   | 0.232(4)    | 0.095(3)    | 0.914(3)    | 0.70(7)    |
| Al1  | 0.667(2)    | 0.3322(15)  | 0.59583(8)  | 0.0285(15) |
| Fe2  | 0.666667    | 0.333333    | 0.833333    | 0.0546(4)  |
| Al2  | 0.42170(3)  | 0.28068(3)  | 0.75419(3)  | 0.0264(2)  |
| Al3  | 0.18312(3)  | 0.23685(3)  | 0.91850(3)  | 0.0259(2)  |
| C4   | 0.6917(16)  | 0.3991(7)   | 0.8348(15)  | 0.112(15)  |
| O4   | 0.7065(16)  | 0.4357(9)   | 0.8302(15)  | 0.165(17)  |
| O1_2 | 0.6782(2)   | 0.38249(17) | 0.6100(2)   | 0.066(2)   |
| C1_2 | 0.66759(15) | 0.40978(15) | 0.62393(15) | 0.0448(11) |
| C2_2 | 0.69640(19) | 0.45244(17) | 0.60434(19) | 0.0640(14) |
| F1_2 | 0.68512(19) | 0.45195(17) | 0.56752(13) | 0.1070(17) |
| F2_2 | 0.69625(16) | 0.48440(13) | 0.62071(17) | 0.0838(15) |
| F3_2 | 0.73682(12) | 0.46102(14) | 0.60629(18) | 0.0880(15) |
| C3_2 | 0.6747(2)   | 0.4145(2)   | 0.66848(18) | 0.0772(18) |
| F4_2 | 0.6579(3)   | 0.3762(2)   | 0.6843(2)   | 0.123(2)   |
| F5_2 | 0.71494(17) | 0.43629(17) | 0.67745(15) | 0.0981(16) |
| F6_2 | 0.6571(3)   | 0.4346(2)   | 0.68418(18) | 0.119(2)   |
| C4_2 | 0.62151(19) | 0.3959(2)   | 0.6153(2)   | 0.0750(18) |
| F7_2 | 0.59607(13) | 0.36575(13) | 0.6392(2)   | 0.1007(18) |
| F8_2 | 0.6132(3)   | 0.4267(2)   | 0.6162(2)   | 0.106(2)   |
| F9_2 | 0.61272(17) | 0.3795(2)   | 0.57908(18) | 0.106(2)   |
| O1_3 | 0.6715(10)  | 0.3450(8)   | 0.5481(4)   | 0.036(6)   |
| C1_3 | 0.6651(7)   | 0.3356(6)   | 0.5100(4)   | 0.044(3)   |
| C2_3 | 0.6698(7)   | 0.3752(7)   | 0.4892(6)   | 0.060(5)   |
| F1_3 | 0.6362(10)  | 0.3783(13)  | 0.4962(13)  | 0.079(6)   |
| F2_3 | 0.6757(10)  | 0.3743(11)  | 0.4515(5)   | 0.100(8)   |
| F3_3 | 0.7028(10)  | 0.4092(7)   | 0.5041(10)  | 0.084(7)   |
| C3_3 | 0.6967(7)   | 0.3241(8)   | 0.4932(8)   | 0.067(5)   |
| F4_3 | 0.7000(12)  | 0.2968(13)  | 0.5165(12)  | 0.075(9)   |
| F5_3 | 0.7347(8)   | 0.3575(11)  | 0.4911(12)  | 0.090(8)   |
| F6_3 | 0.6866(11)  | 0.3061(12)  | 0.4582(9)   | 0.081(8)   |
| C4_3 | 0.6198(6)   | 0.2997(6)   | 0.5026(6)   | 0.056(4)   |
| F7_3 | 0.6168(8)   | 0.2637(5)   | 0.5126(6)   | 0.086(6)   |
| F8_3 | 0.6089(9)   | 0.2977(9)   | 0.4653(6)   | 0.085(7)   |
| F9_3 | 0.5931(9)   | 0.3055(11)  | 0.5238(10)  | 0.070(6)   |
| O1_4 | 0.45710(13) | 0.31661(12) | 0.72139(13) | 0.0439(9)  |
| C1_4 | 0.48644(18) | 0.35664(16) | 0.71239(16) | 0.0444(13) |
| C2_4 | 0.4886(2)   | 0.35955(19) | 0.66767(17) | 0.0660(16) |
| F1_4 | 0.5046(2)   | 0.33668(19) | 0.65349(15) | 0.106(2)   |
| F2_4 | 0.5122(2)   | 0.39775(15) | 0.65468(14) | 0.112(2)   |
| F3_4 | 0.45130(18) | 0.3444(2)   | 0.65197(14) | 0.120(2)   |
| C3_4 | 0.4757(2)   | 0.38941(18) | 0.72850(19) | 0.0669(16) |
| F4_4 | 0.4629(3)   | 0.38054(18) | 0.76439(15) | 0.113(2)   |
| F5_4 | 0.44230(19) | 0.3869(2)   | 0.7078(2)   | 0.1034(19) |
| F6_4 | 0.5058(2)   | 0.42806(14) | 0.72528(18) | 0.0926(18) |
| C4_4 | 0.52954(18) | 0.36623(19) | 0.72881(18) | 0.0645(16) |
| F7_4 | 0.5302(2)   | 0.3726(2)   | 0.76772(19) | 0.111(2)   |
| F8_4 | 0.56122(16) | 0.40052(16) | 0.7140(2)   | 0.0972(18) |
| F9_4 | 0.53759(18) | 0.33677(18) | 0.7206(2)   | 0.111(2)   |
| O1_5 | 0.4088(2)   | 0.23289(18) | 0.73511(16) | 0.0507(11) |
| C1_5 | 0.42058(14) | 0.20555(14) | 0.72312(13) | 0.0353(9)  |
| C2_5 | 0.42866(16) | 0.20979(16) | 0.67898(14) | 0.0531(12) |
| F1_5 | 0.46519(13) | 0.24411(12) | 0.67160(13) | 0.0841(12) |

|      |             |             |             |            |
|------|-------------|-------------|-------------|------------|
| F2_5 | 0.42982(13) | 0.17765(14) | 0.66303(14) | 0.0704(12) |
| F3_5 | 0.39879(15) | 0.21300(17) | 0.66006(12) | 0.0816(13) |
| C3_5 | 0.38330(16) | 0.16173(16) | 0.73241(16) | 0.0570(13) |
| F4_5 | 0.36931(17) | 0.1597(2)   | 0.76861(14) | 0.0972(17) |
| F5_5 | 0.35172(11) | 0.15251(11) | 0.70802(14) | 0.0809(12) |
| F6_5 | 0.3920(3)   | 0.13140(19) | 0.7283(2)   | 0.0889(17) |
| C4_5 | 0.46012(17) | 0.21109(17) | 0.74426(16) | 0.0546(13) |
| F7_5 | 0.45151(15) | 0.19780(15) | 0.78084(10) | 0.0833(13) |
| F8_5 | 0.4772(2)   | 0.19090(18) | 0.7274(2)   | 0.0747(14) |
| F9_5 | 0.48908(13) | 0.25176(12) | 0.74574(15) | 0.0781(13) |
| O1_6 | 0.4419(2)   | 0.2852(2)   | 0.79990(13) | 0.0610(18) |
| C1_6 | 0.43894(15) | 0.28407(16) | 0.83899(14) | 0.0420(11) |
| C2_6 | 0.48210(16) | 0.29394(17) | 0.85518(14) | 0.0506(12) |
| F1_6 | 0.51057(12) | 0.33366(13) | 0.84997(15) | 0.0853(13) |
| F2_6 | 0.48171(16) | 0.28736(19) | 0.89324(11) | 0.0900(15) |
| F3_6 | 0.49624(15) | 0.27154(17) | 0.83822(13) | 0.0885(15) |
| C3_6 | 0.40502(18) | 0.24038(19) | 0.85253(16) | 0.0642(14) |
| F4_6 | 0.37187(14) | 0.22527(18) | 0.83041(15) | 0.116(2)   |
| F5_6 | 0.41907(19) | 0.21212(13) | 0.84822(16) | 0.1021(16) |
| F6_6 | 0.39546(17) | 0.23760(17) | 0.88902(12) | 0.0896(15) |
| C4_6 | 0.42821(17) | 0.31676(19) | 0.85455(15) | 0.0562(13) |
| F7_6 | 0.38721(16) | 0.3029(2)   | 0.84779(15) | 0.1013(19) |
| F8_6 | 0.43393(16) | 0.32365(17) | 0.89177(13) | 0.0795(14) |
| F9_6 | 0.4506(2)   | 0.35264(16) | 0.83794(17) | 0.117(2)   |
| O1_7 | 0.3737(5)   | 0.2781(5)   | 0.7585(6)   | 0.055(4)   |
| C1_7 | 0.3374(4)   | 0.2719(3)   | 0.7429(3)   | 0.049(3)   |
| C2_7 | 0.3348(4)   | 0.2644(4)   | 0.6990(3)   | 0.067(3)   |
| F1_7 | 0.3313(3)   | 0.2281(4)   | 0.6903(3)   | 0.112(4)   |
| F2_7 | 0.3036(5)   | 0.2660(8)   | 0.6814(7)   | 0.097(3)   |
| F3_7 | 0.3703(3)   | 0.2940(5)   | 0.6819(2)   | 0.113(5)   |
| C3_7 | 0.3297(4)   | 0.3090(4)   | 0.7510(4)   | 0.072(3)   |
| F4_7 | 0.3379(4)   | 0.3198(4)   | 0.7889(3)   | 0.097(3)   |
| F5_7 | 0.3527(3)   | 0.3414(3)   | 0.7289(4)   | 0.108(3)   |
| F6_7 | 0.2890(4)   | 0.2971(7)   | 0.7479(5)   | 0.086(4)   |
| C4_7 | 0.3026(4)   | 0.2316(4)   | 0.7631(4)   | 0.077(3)   |
| F7_7 | 0.2983(3)   | 0.2413(4)   | 0.7990(2)   | 0.114(4)   |
| F8_7 | 0.2667(5)   | 0.2158(8)   | 0.7425(6)   | 0.103(4)   |
| F9_7 | 0.3150(2)   | 0.2032(2)   | 0.7628(4)   | 0.101(3)   |
| O1_8 | 0.1662(2)   | 0.24128(18) | 0.87312(15) | 0.0378(11) |
| C1_8 | 0.17002(16) | 0.24066(16) | 0.83405(17) | 0.0390(11) |
| C2_8 | 0.21112(18) | 0.28004(19) | 0.82043(16) | 0.0608(15) |
| F1_8 | 0.24344(11) | 0.27560(18) | 0.82694(12) | 0.0771(13) |
| F2_8 | 0.2109(3)   | 0.2875(3)   | 0.78259(17) | 0.091(2)   |
| F3_8 | 0.21604(19) | 0.31414(14) | 0.83973(19) | 0.0873(16) |
| C3_8 | 0.13226(19) | 0.2420(2)   | 0.81691(18) | 0.0670(16) |
| F4_8 | 0.0970(2)   | 0.2153(3)   | 0.8350(3)   | 0.0865(16) |
| F5_8 | 0.13695(19) | 0.28021(17) | 0.81983(16) | 0.1012(17) |
| F6_8 | 0.1265(3)   | 0.2321(2)   | 0.77913(19) | 0.094(2)   |
| C4_8 | 0.1702(2)   | 0.20116(18) | 0.81996(16) | 0.0599(14) |
| F7_8 | 0.13177(16) | 0.16775(13) | 0.82180(16) | 0.0822(15) |
| F8_8 | 0.1835(2)   | 0.20318(18) | 0.78425(13) | 0.0816(15) |
| F9_8 | 0.19540(16) | 0.19405(15) | 0.84360(12) | 0.0747(13) |
| O1_9 | 0.23763(14) | 0.2635(2)   | 0.91840(18) | 0.0333(11) |
| C1_9 | 0.27365(14) | 0.26945(14) | 0.93440(13) | 0.0316(10) |
| C2_9 | 0.28340(15) | 0.23612(16) | 0.91800(15) | 0.0509(12) |

|        |             |             |             |            |
|--------|-------------|-------------|-------------|------------|
| F1_9   | 0.2849(2)   | 0.2367(2)   | 0.88009(13) | 0.112(2)   |
| F2_9   | 0.31967(13) | 0.24111(18) | 0.92946(16) | 0.0853(14) |
| F3_9   | 0.2548(2)   | 0.19795(18) | 0.9314(3)   | 0.121(3)   |
| C3_9   | 0.27113(16) | 0.26579(17) | 0.97924(14) | 0.0537(13) |
| F4_9   | 0.2665(3)   | 0.2974(3)   | 0.99393(19) | 0.124(2)   |
| F5_9   | 0.23927(19) | 0.23126(19) | 0.99016(12) | 0.132(3)   |
| F6_9   | 0.30449(17) | 0.26957(18) | 0.99576(17) | 0.0905(17) |
| C4_9   | 0.30877(15) | 0.31341(15) | 0.92251(16) | 0.0529(13) |
| F7_9   | 0.30048(15) | 0.34227(11) | 0.9323(2)   | 0.125(3)   |
| F8_9   | 0.34566(14) | 0.32453(15) | 0.93717(19) | 0.094(2)   |
| F9_9   | 0.31337(17) | 0.31434(19) | 0.88298(14) | 0.112(2)   |
| O1_10  | 0.1644(2)   | 0.18553(17) | 0.9330(2)   | 0.0421(8)  |
| C1_10  | 0.13211(14) | 0.14852(15) | 0.94464(13) | 0.0330(9)  |
| C2_10  | 0.08926(13) | 0.14183(13) | 0.93049(14) | 0.0416(10) |
| F1_10  | 0.08191(14) | 0.17007(16) | 0.9447(2)   | 0.127(3)   |
| F2_10  | 0.05723(16) | 0.10603(18) | 0.9395(2)   | 0.094(2)   |
| F3_10  | 0.08861(19) | 0.1450(3)   | 0.89263(14) | 0.112(2)   |
| C3_10  | 0.13901(15) | 0.11346(14) | 0.92821(15) | 0.0496(12) |
| F4_10  | 0.17523(16) | 0.11835(18) | 0.9394(2)   | 0.122(2)   |
| F5_10  | 0.1385(3)   | 0.11341(17) | 0.89032(13) | 0.131(3)   |
| F6_10  | 0.11051(16) | 0.07570(12) | 0.93795(15) | 0.0751(15) |
| C4_10  | 0.13136(16) | 0.14650(15) | 0.98982(14) | 0.0505(12) |
| F7_10  | 0.16648(14) | 0.1507(2)   | 1.00333(14) | 0.121(2)   |
| F8_10  | 0.10195(19) | 0.11109(18) | 1.00409(19) | 0.0800(15) |
| F9_10  | 0.1273(3)   | 0.1769(2)   | 1.00447(19) | 0.124(3)   |
| O1_11  | 0.1630(5)   | 0.2590(4)   | 0.9479(4)   | 0.067(3)   |
| C1_11  | 0.1540(3)   | 0.2889(3)   | 0.9578(3)   | 0.050(2)   |
| C2_11  | 0.1924(3)   | 0.3327(3)   | 0.9502(3)   | 0.067(2)   |
| F1_11  | 0.2212(3)   | 0.3415(2)   | 0.9768(3)   | 0.106(3)   |
| F2_11  | 0.1819(5)   | 0.3626(4)   | 0.9480(3)   | 0.084(3)   |
| F3_11  | 0.20884(19) | 0.33288(16) | 0.9153(2)   | 0.0749(17) |
| C3_11  | 0.1171(3)   | 0.2852(3)   | 0.9339(3)   | 0.082(2)   |
| F4_11  | 0.0866(2)   | 0.2436(2)   | 0.9315(3)   | 0.117(3)   |
| F5_11  | 0.1279(2)   | 0.2975(2)   | 0.89833(19) | 0.097(2)   |
| F6_11  | 0.0984(5)   | 0.3045(4)   | 0.9498(6)   | 0.113(3)   |
| C4_11  | 0.1420(4)   | 0.2822(3)   | 1.0011(3)   | 0.091(3)   |
| F7_11  | 0.1050(3)   | 0.2497(2)   | 1.0066(3)   | 0.130(3)   |
| F8_11  | 0.1426(6)   | 0.3154(5)   | 1.0171(6)   | 0.143(4)   |
| F9_11  | 0.1717(4)   | 0.2788(3)   | 1.0212(2)   | 0.124(3)   |
| C1_12  | 0.2115(2)   | 0.0079(2)   | 0.88023(17) | 0.0375(15) |
| C2_12  | 0.2258(3)   | -0.0093(4)  | 0.8512(2)   | 0.039(2)   |
| C3_12  | 0.2020(4)   | -0.0155(6)  | 0.8168(2)   | 0.0377(17) |
| C4_12  | 0.1722(3)   | -0.0027(4)  | 0.8252(2)   | 0.0394(15) |
| C5_12  | 0.1779(2)   | 0.0111(3)   | 0.86477(18) | 0.0341(13) |
| C6_12  | 0.1503(3)   | 0.0230(4)   | 0.8867(3)   | 0.090(3)   |
| H6A_12 | 0.123412    | -0.002265   | 0.892202    | 0.135      |
| H6B_12 | 0.145422    | 0.042319    | 0.870952    | 0.135      |
| H6C_12 | 0.163833    | 0.036547    | 0.911147    | 0.135      |
| C7_12  | 0.1385(3)   | -0.0076(4)  | 0.7979(3)   | 0.085(3)   |
| H7A_12 | 0.147927    | -0.006406   | 0.770996    | 0.127      |
| H7B_12 | 0.132412    | 0.015090    | 0.802208    | 0.127      |
| H7C_12 | 0.113211    | -0.034598   | 0.802484    | 0.127      |
| C8_12  | 0.2055(3)   | -0.0360(3)  | 0.7807(2)   | 0.059(2)   |
| H8A_12 | 0.191547    | -0.030466   | 0.759140    | 0.088      |
| H8B_12 | 0.192172    | -0.066319   | 0.784860    | 0.088      |

|         |            |            |             |            |
|---------|------------|------------|-------------|------------|
| H8C_12  | 0.235133   | -0.024801  | 0.774253    | 0.088      |
| C9_12   | 0.2572(3)  | -0.0230(3) | 0.8581(3)   | 0.067(2)   |
| H9A_12  | 0.268259   | -0.025998  | 0.833165    | 0.100      |
| H9B_12  | 0.243734   | -0.049947  | 0.871767    | 0.100      |
| H9C_12  | 0.280219   | -0.002027  | 0.874035    | 0.100      |
| C10_12  | 0.2270(3)  | 0.0180(2)  | 0.92132(17) | 0.072(2)   |
| H10A_12 | 0.256198   | 0.024581   | 0.922415    | 0.108      |
| H10B_12 | 0.209798   | -0.006232  | 0.937987    | 0.108      |
| H10C_12 | 0.225002   | 0.042117   | 0.930419    | 0.108      |
| C1_13   | 0.2691(3)  | 0.1168(2)  | 0.8324(2)   | 0.0362(17) |
| C2_13   | 0.2944(2)  | 0.0995(2)  | 0.8433(2)   | 0.0394(17) |
| C3_13   | 0.2955(2)  | 0.0757(2)  | 0.8114(2)   | 0.0379(17) |
| C4_13   | 0.2695(5)  | 0.0759(5)  | 0.7815(3)   | 0.035(2)   |
| C5_13   | 0.2539(4)  | 0.1022(4)  | 0.7940(3)   | 0.040(2)   |
| C6_13   | 0.2302(5)  | 0.1157(5)  | 0.7680(3)   | 0.096(4)   |
| H6A_13  | 0.249985   | 0.139660   | 0.752275    | 0.144      |
| H6B_13  | 0.213380   | 0.123907   | 0.783943    | 0.144      |
| H6C_13  | 0.211699   | 0.092543   | 0.750896    | 0.144      |
| C7_13   | 0.2659(4)  | 0.0591(3)  | 0.7412(2)   | 0.060(3)   |
| H7A_13  | 0.237788   | 0.049882   | 0.730995    | 0.089      |
| H7B_13  | 0.270757   | 0.035284   | 0.741835    | 0.089      |
| H7C_13  | 0.286791   | 0.081063   | 0.724388    | 0.089      |
| C8_13   | 0.3241(3)  | 0.0581(3)  | 0.8082(4)   | 0.075(3)   |
| H8A_13  | 0.308791   | 0.029843   | 0.797100    | 0.113      |
| H8B_13  | 0.334543   | 0.056790   | 0.834064    | 0.113      |
| H8C_13  | 0.347766   | 0.076066   | 0.791277    | 0.113      |
| C9_13   | 0.3189(3)  | 0.1092(3)  | 0.8802(3)   | 0.084(3)   |
| H9A_13  | 0.326259   | 0.087492   | 0.885160    | 0.125      |
| H9B_13  | 0.301922   | 0.109951   | 0.901779    | 0.125      |
| H9C_13  | 0.344504   | 0.136463   | 0.877889    | 0.125      |
| C10_13  | 0.2650(4)  | 0.1496(3)  | 0.8538(3)   | 0.079(3)   |
| H10A_13 | 0.252298   | 0.138820   | 0.879320    | 0.119      |
| H10B_13 | 0.247172   | 0.157338   | 0.838920    | 0.119      |
| H10C_13 | 0.292733   | 0.174388   | 0.857300    | 0.119      |
| C1_14   | 0.6313(8)  | 0.3040(9)  | 0.784(2)    | 0.029(7)   |
| C2_14   | 0.6398(9)  | 0.3460(10) | 0.785(2)    | 0.031(6)   |
| C3_14   | 0.6839(10) | 0.3731(9)  | 0.786(4)    | 0.034(6)   |
| C4_14   | 0.7026(8)  | 0.3475(10) | 0.783(3)    | 0.037(7)   |
| C5_14   | 0.6701(9)  | 0.3053(9)  | 0.778(2)    | 0.033(6)   |
| C6_14   | 0.6753(15) | 0.2712(12) | 0.7599(16)  | 0.063(8)   |
| H6A_14  | 0.670215   | 0.249868   | 0.779409    | 0.094      |
| H6B_14  | 0.703805   | 0.283091   | 0.749702    | 0.094      |
| H6C_14  | 0.655157   | 0.258472   | 0.738531    | 0.094      |
| C7_14   | 0.7485(9)  | 0.3634(18) | 0.779(2)    | 0.074(11)  |
| H7A_14  | 0.754228   | 0.340550   | 0.783330    | 0.111      |
| H7B_14  | 0.764219   | 0.386045   | 0.797249    | 0.111      |
| H7C_14  | 0.757102   | 0.374050   | 0.752078    | 0.111      |
| C8_14   | 0.7063(16) | 0.4199(9)  | 0.7860(19)  | 0.047(9)   |
| H8A_14  | 0.712174   | 0.429873   | 0.759059    | 0.070      |
| H8B_14  | 0.732682   | 0.430877   | 0.800348    | 0.070      |
| H8C_14  | 0.688708   | 0.429617   | 0.798296    | 0.070      |
| C9_14   | 0.6074(13) | 0.3590(16) | 0.7848(14)  | 0.045(7)   |
| H9A_14  | 0.600805   | 0.362384   | 0.757886    | 0.068      |
| H9B_14  | 0.618152   | 0.385686   | 0.798633    | 0.068      |
| H9C_14  | 0.582041   | 0.337550   | 0.797732    | 0.068      |

|         |            |            |            |           |
|---------|------------|------------|------------|-----------|
| C10_14  | 0.5884(9)  | 0.2664(12) | 0.7819(13) | 0.042(8)  |
| H10A_14 | 0.567465   | 0.275371   | 0.782024   | 0.063     |
| H10B_14 | 0.583674   | 0.248053   | 0.804306   | 0.063     |
| H10C_14 | 0.585843   | 0.251059   | 0.757857   | 0.063     |
| C1_15   | 0.3013(3)  | 0.0914(4)  | 0.8223(4)  | 0.043(3)  |
| C2_15   | 0.2788(7)  | 0.0797(9)  | 0.7868(5)  | 0.043(3)  |
| C3_15   | 0.2473(5)  | 0.0909(6)  | 0.7890(4)  | 0.042(4)  |
| C4_15   | 0.2506(4)  | 0.1098(4)  | 0.8256(3)  | 0.042(3)  |
| C5_15   | 0.2840(4)  | 0.1108(4)  | 0.8461(3)  | 0.042(3)  |
| C6_15   | 0.3006(7)  | 0.1316(8)  | 0.8845(4)  | 0.153(13) |
| H6A_15  | 0.311141   | 0.115965   | 0.899140   | 0.230     |
| H6B_15  | 0.278099   | 0.132075   | 0.899231   | 0.230     |
| H6C_15  | 0.323406   | 0.160321   | 0.880268   | 0.230     |
| C7_15   | 0.2249(6)  | 0.1286(5)  | 0.8397(6)  | 0.103(8)  |
| H7A_15  | 0.240725   | 0.159015   | 0.836095   | 0.155     |
| H7B_15  | 0.218374   | 0.122110   | 0.867301   | 0.155     |
| H7C_15  | 0.198767   | 0.116796   | 0.824743   | 0.155     |
| C8_15   | 0.2183(7)  | 0.0877(8)  | 0.7569(5)  | 0.104(5)  |
| H8A_15  | 0.230658   | 0.114239   | 0.742659   | 0.156     |
| H8B_15  | 0.191384   | 0.081677   | 0.768028   | 0.156     |
| H8C_15  | 0.213968   | 0.065102   | 0.739165   | 0.156     |
| C9_15   | 0.2859(6)  | 0.0606(6)  | 0.7514(5)  | 0.076(5)  |
| H9A_15  | 0.297984   | 0.081660   | 0.730772   | 0.114     |
| H9B_15  | 0.259109   | 0.037127   | 0.742536   | 0.114     |
| H9C_15  | 0.305136   | 0.050360   | 0.757662   | 0.114     |
| C10_15  | 0.3391(5)  | 0.0887(9)  | 0.8308(7)  | 0.131(10) |
| H10A_15 | 0.350786   | 0.085086   | 0.806515   | 0.196     |
| H10B_15 | 0.331714   | 0.064718   | 0.847955   | 0.196     |
| H10C_15 | 0.359942   | 0.114476   | 0.843739   | 0.196     |
| O1_16   | 0.2322(8)  | 0.2598(13) | 0.9229(11) | 0.055(7)  |
| C1_16   | 0.2695(6)  | 0.2680(5)  | 0.9354(5)  | 0.048(4)  |
| C2_16   | 0.3054(5)  | 0.2923(6)  | 0.9062(5)  | 0.069(4)  |
| F1_16   | 0.2998(5)  | 0.3233(7)  | 0.8926(7)  | 0.071(4)  |
| F2_16   | 0.3432(6)  | 0.3096(8)  | 0.9224(8)  | 0.092(6)  |
| F3_16   | 0.3018(10) | 0.2633(9)  | 0.8814(7)  | 0.120(6)  |
| C3_16   | 0.2696(6)  | 0.2272(5)  | 0.9474(6)  | 0.078(5)  |
| F4_16   | 0.2514(6)  | 0.2181(6)  | 0.9823(5)  | 0.068(4)  |
| F5_16   | 0.2529(8)  | 0.2018(8)  | 0.9169(8)  | 0.087(5)  |
| F6_16   | 0.3093(6)  | 0.2355(9)  | 0.9494(8)  | 0.095(5)  |
| C4_16   | 0.2816(7)  | 0.2945(7)  | 0.9732(6)  | 0.103(5)  |
| F7_16   | 0.2462(8)  | 0.2762(10) | 0.9937(7)  | 0.101(5)  |
| F8_16   | 0.3095(8)  | 0.2882(9)  | 0.9922(8)  | 0.097(5)  |
| F9_16   | 0.2955(10) | 0.3332(6)  | 0.9610(9)  | 0.144(10) |
| O1_17   | 0.1674(9)  | 0.2298(8)  | 0.8716(5)  | 0.057(7)  |
| C1_17   | 0.1686(5)  | 0.2351(5)  | 0.8329(6)  | 0.053(4)  |
| C2_17   | 0.1963(6)  | 0.2191(6)  | 0.8147(6)  | 0.083(5)  |
| F1_17   | 0.1847(8)  | 0.1810(6)  | 0.8271(7)  | 0.103(5)  |
| F2_17   | 0.1893(11) | 0.2153(10) | 0.7763(5)  | 0.099(6)  |
| F3_17   | 0.2361(5)  | 0.2454(8)  | 0.8222(7)  | 0.100(6)  |
| C3_17   | 0.1899(6)  | 0.2822(5)  | 0.8220(6)  | 0.083(5)  |
| F4_17   | 0.1634(8)  | 0.2959(8)  | 0.8273(8)  | 0.122(5)  |
| F5_17   | 0.2248(7)  | 0.3023(6)  | 0.8436(8)  | 0.087(6)  |
| F6_17   | 0.2018(12) | 0.2890(12) | 0.7849(7)  | 0.093(5)  |
| C4_17   | 0.1242(5)  | 0.2105(6)  | 0.8157(6)  | 0.066(5)  |
| F7_17   | 0.0992(10) | 0.2178(14) | 0.8381(14) | 0.093(6)  |

|         |            |             |            |           |
|---------|------------|-------------|------------|-----------|
| F8_17   | 0.1217(14) | 0.2190(11)  | 0.7789(8)  | 0.101(6)  |
| F9_17   | 0.1110(7)  | 0.1696(5)   | 0.8172(7)  | 0.092(5)  |
| C1_18   | 0.1957(6)  | -0.0008(6)  | 0.8784(4)  | 0.040(4)  |
| C2_18   | 0.1727(8)  | 0.0087(10)  | 0.8513(5)  | 0.047(4)  |
| C3_18   | 0.1791(8)  | -0.0031(10) | 0.8139(5)  | 0.039(4)  |
| C4_18   | 0.2092(15) | -0.0159(18) | 0.8170(6)  | 0.036(4)  |
| C5_18   | 0.2186(10) | -0.0158(12) | 0.8573(5)  | 0.039(5)  |
| C6_18   | 0.2439(8)  | -0.0345(9)  | 0.8720(9)  | 0.072(5)  |
| H6A_18  | 0.246644   | -0.031397   | 0.900309   | 0.108     |
| H6B_18  | 0.271722   | -0.020075   | 0.860037   | 0.108     |
| H6C_18  | 0.229795   | -0.064315   | 0.865220   | 0.108     |
| C7_18   | 0.2221(9)  | -0.0359(10) | 0.7863(8)  | 0.066(6)  |
| H7A_18  | 0.252312   | -0.025068   | 0.788000   | 0.100     |
| H7B_18  | 0.215271   | -0.029355   | 0.760620   | 0.100     |
| H7C_18  | 0.207099   | -0.066292   | 0.790071   | 0.100     |
| C8_18   | 0.1542(11) | -0.0059(12) | 0.7785(8)  | 0.093(6)  |
| H8A_18  | 0.141921   | 0.012149    | 0.781853   | 0.139     |
| H8B_18  | 0.131762   | -0.034916   | 0.774798   | 0.139     |
| H8C_18  | 0.172536   | 0.003300    | 0.755652   | 0.139     |
| C9_18   | 0.1405(9)  | 0.0206(12)  | 0.8617(10) | 0.097(5)  |
| H9A_18  | 0.112484   | -0.003994   | 0.859482   | 0.145     |
| H9B_18  | 0.142930   | 0.042502    | 0.843929   | 0.145     |
| H9C_18  | 0.145144   | 0.031135    | 0.888457   | 0.145     |
| C10_18  | 0.1910(8)  | -0.0027(7)  | 0.9218(4)  | 0.090(9)  |
| H10A_18 | 0.163712   | -0.026486   | 0.928948   | 0.136     |
| H10B_18 | 0.192912   | 0.023322    | 0.931225   | 0.136     |
| H10C_18 | 0.213317   | -0.006053   | 0.933618   | 0.136     |
| O1_19   | 0.4544(6)  | 0.3252(5)   | 0.7363(5)  | 0.086(6)  |
| C1_19   | 0.4851(5)  | 0.3575(5)   | 0.7172(4)  | 0.060(4)  |
| C2_19   | 0.5053(5)  | 0.3474(6)   | 0.6832(5)  | 0.087(5)  |
| F1_19   | 0.4738(7)  | 0.3193(7)   | 0.6615(6)  | 0.123(7)  |
| F2_19   | 0.5291(8)  | 0.3817(7)   | 0.6614(7)  | 0.162(11) |
| F3_19   | 0.5288(7)  | 0.3327(7)   | 0.6974(8)  | 0.124(5)  |
| C3_19   | 0.5183(5)  | 0.3817(6)   | 0.7493(5)  | 0.102(5)  |
| F4_19   | 0.5025(6)  | 0.4002(6)   | 0.7710(6)  | 0.129(7)  |
| F5_19   | 0.5243(7)  | 0.3520(6)   | 0.7654(7)  | 0.108(5)  |
| F6_19   | 0.5546(5)  | 0.4086(6)   | 0.7337(7)  | 0.105(5)  |
| C4_19   | 0.4694(6)  | 0.3869(5)   | 0.7029(5)  | 0.096(5)  |
| F7_19   | 0.4426(7)  | 0.3822(7)   | 0.7312(7)  | 0.112(5)  |
| F8_19   | 0.5013(6)  | 0.4262(5)   | 0.7030(7)  | 0.101(5)  |
| F9_19   | 0.4522(8)  | 0.3739(6)   | 0.6684(6)  | 0.133(8)  |
| O1_20   | 0.1645(12) | 0.1872(9)   | 0.9295(14) | 0.0421(8) |
| C1_20   | 0.1342(7)  | 0.1496(7)   | 0.9417(6)  | 0.044(4)  |
| C2_20   | 0.1152(8)  | 0.1530(8)   | 0.9806(6)  | 0.073(5)  |
| F1_20   | 0.0889(9)  | 0.1666(10)  | 0.9722(11) | 0.128(5)  |
| F2_20   | 0.0949(13) | 0.1170(10)  | 0.9995(11) | 0.087(6)  |
| F3_20   | 0.1452(12) | 0.1808(12)  | 1.0034(9)  | 0.110(7)  |
| C3_20   | 0.1512(7)  | 0.1193(7)   | 0.9472(8)  | 0.101(4)  |
| F4_20   | 0.1734(11) | 0.1216(11)  | 0.9162(10) | 0.119(6)  |
| F5_20   | 0.1744(8)  | 0.1316(7)   | 0.9792(9)  | 0.126(9)  |
| F6_20   | 0.1209(9)  | 0.0801(7)   | 0.9523(10) | 0.081(5)  |
| C4_20   | 0.0979(6)  | 0.1304(7)   | 0.9115(6)  | 0.068(5)  |
| F7_20   | 0.1111(8)  | 0.1181(8)   | 0.8812(7)  | 0.127(11) |
| F8_20   | 0.0638(9)  | 0.1002(10)  | 0.9281(11) | 0.087(7)  |
| F9_20   | 0.0892(10) | 0.1604(10)  | 0.9035(10) | 0.089(5)  |

|         |            |            |            |            |
|---------|------------|------------|------------|------------|
| O1_21   | 0.6753(9)  | 0.3747(8)  | 0.6219(8)  | 0.044(5)   |
| C1_21   | 0.6668(5)  | 0.4045(6)  | 0.6328(6)  | 0.059(4)   |
| C2_21   | 0.7065(6)  | 0.4480(5)  | 0.6315(7)  | 0.078(5)   |
| F1_21   | 0.7229(8)  | 0.4549(9)  | 0.5955(7)  | 0.091(5)   |
| F2_21   | 0.6966(9)  | 0.4772(6)  | 0.6400(9)  | 0.089(5)   |
| F3_21   | 0.7349(8)  | 0.4498(8)  | 0.6561(8)  | 0.102(5)   |
| C3_21   | 0.6491(8)  | 0.3931(8)  | 0.6750(6)  | 0.097(5)   |
| F4_21   | 0.6098(8)  | 0.3624(9)  | 0.6712(10) | 0.133(9)   |
| F5_21   | 0.6716(13) | 0.3793(14) | 0.6932(10) | 0.114(5)   |
| F6_21   | 0.6507(15) | 0.4242(11) | 0.6950(10) | 0.112(6)   |
| C4_21   | 0.6320(7)  | 0.4053(7)  | 0.6087(7)  | 0.080(5)   |
| F7_21   | 0.6008(7)  | 0.3664(7)  | 0.6029(10) | 0.092(5)   |
| F8_21   | 0.6154(13) | 0.4245(13) | 0.6289(12) | 0.105(6)   |
| F9_21   | 0.6477(11) | 0.4251(11) | 0.5754(8)  | 0.139(10)  |
| O1_22   | 0.4125(14) | 0.2330(12) | 0.7419(12) | 0.0507(11) |
| C1_22   | 0.4177(6)  | 0.2024(8)  | 0.7264(6)  | 0.045(4)   |
| C2_22   | 0.4015(7)  | 0.1921(8)  | 0.6842(6)  | 0.076(5)   |
| F1_22   | 0.4157(11) | 0.2289(9)  | 0.6664(8)  | 0.090(6)   |
| F2_22   | 0.4146(10) | 0.1685(11) | 0.6670(11) | 0.087(6)   |
| F3_22   | 0.3599(7)  | 0.1715(10) | 0.6832(10) | 0.107(9)   |
| C3_22   | 0.3942(8)  | 0.1621(8)  | 0.7509(7)  | 0.075(6)   |
| F4_22   | 0.4137(11) | 0.1686(11) | 0.7846(7)  | 0.117(10)  |
| F5_22   | 0.3552(8)  | 0.1533(12) | 0.7568(11) | 0.086(6)   |
| F6_22   | 0.3930(19) | 0.1293(12) | 0.7339(15) | 0.086(5)   |
| C4_22   | 0.4650(6)  | 0.2165(7)  | 0.7269(7)  | 0.064(5)   |
| F7_22   | 0.4798(8)  | 0.2352(9)  | 0.7610(8)  | 0.074(5)   |
| F8_22   | 0.4709(15) | 0.1840(11) | 0.7236(15) | 0.078(5)   |
| F9_22   | 0.4845(9)  | 0.2433(9)  | 0.6985(9)  | 0.108(9)   |
| C1_23   | 0.6902(8)  | 0.3743(8)  | 0.788(3)   | 0.032(5)   |
| C2_23   | 0.6457(8)  | 0.3532(9)  | 0.788(2)   | 0.033(6)   |
| C3_23   | 0.6298(8)  | 0.3103(9)  | 0.779(2)   | 0.031(7)   |
| C4_23   | 0.6647(9)  | 0.3043(8)  | 0.775(2)   | 0.035(6)   |
| C5_23   | 0.7018(8)  | 0.3439(10) | 0.7786(19) | 0.035(6)   |
| C6_23   | 0.7455(9)  | 0.3520(18) | 0.773(2)   | 0.076(10)  |
| H6A_23  | 0.754321   | 0.361000   | 0.746082   | 0.114      |
| H6B_23  | 0.746229   | 0.326272   | 0.778128   | 0.114      |
| H6C_23  | 0.764409   | 0.374024   | 0.790858   | 0.114      |
| C7_23   | 0.6632(15) | 0.2635(9)  | 0.7692(15) | 0.065(8)   |
| H7A_23  | 0.668539   | 0.260584   | 0.741762   | 0.097      |
| H7B_23  | 0.635411   | 0.240540   | 0.776481   | 0.097      |
| H7C_23  | 0.684507   | 0.262501   | 0.785393   | 0.097      |
| C8_23   | 0.5844(8)  | 0.2776(11) | 0.7754(13) | 0.043(7)   |
| H8A_23  | 0.567066   | 0.288034   | 0.786926   | 0.064      |
| H8B_23  | 0.579244   | 0.252066   | 0.788935   | 0.064      |
| H8C_23  | 0.577405   | 0.271432   | 0.747828   | 0.064      |
| C9_23   | 0.6196(12) | 0.3738(14) | 0.7916(12) | 0.043(7)   |
| H9A_23  | 0.631056   | 0.395282   | 0.811939   | 0.065      |
| H9B_23  | 0.590732   | 0.352769   | 0.798187   | 0.065      |
| H9C_23  | 0.619906   | 0.386881   | 0.766668   | 0.065      |
| C10_23  | 0.7195(13) | 0.4206(8)  | 0.7895(16) | 0.049(9)   |
| H10A_23 | 0.704150   | 0.434578   | 0.797983   | 0.074      |
| H10B_23 | 0.731431   | 0.430847   | 0.763676   | 0.074      |
| H10C_23 | 0.742045   | 0.426711   | 0.808018   | 0.074      |
| O1_24   | 0.4436(8)  | 0.2921(7)  | 0.7977(6)  | 0.047(7)   |
| C1_24   | 0.4415(5)  | 0.2880(5)  | 0.8366(6)  | 0.056(4)   |



|       |            |            |            |           |
|-------|------------|------------|------------|-----------|
| C2_24 | 0.4302(6)  | 0.2446(5)  | 0.8531(6)  | 0.077(5)  |
| F1_24 | 0.3983(6)  | 0.2152(5)  | 0.8326(6)  | 0.072(4)  |
| F2_24 | 0.4174(8)  | 0.2412(9)  | 0.8901(6)  | 0.099(6)  |
| F3_24 | 0.4649(8)  | 0.2416(10) | 0.8517(7)  | 0.115(9)  |
| C3_24 | 0.4874(5)  | 0.3194(6)  | 0.8484(6)  | 0.081(5)  |
| F4_24 | 0.4945(10) | 0.3570(6)  | 0.8382(10) | 0.147(11) |
| F5_24 | 0.5121(6)  | 0.3117(9)  | 0.8258(7)  | 0.109(8)  |
| F6_24 | 0.4949(9)  | 0.3134(9)  | 0.8845(6)  | 0.103(6)  |
| C4_24 | 0.4085(6)  | 0.2979(6)  | 0.8531(6)  | 0.089(4)  |
| F7_24 | 0.4089(7)  | 0.3280(6)  | 0.8312(5)  | 0.067(5)  |
| F8_24 | 0.4167(9)  | 0.3120(10) | 0.8895(6)  | 0.086(5)  |
| F9_24 | 0.3719(5)  | 0.2607(7)  | 0.8501(6)  | 0.096(6)  |
| O1_25 | 0.6785(15) | 0.3450(16) | 0.5455(7)  | 0.043(9)  |
| C1_25 | 0.6711(8)  | 0.3389(8)  | 0.5071(7)  | 0.042(4)  |
| C2_25 | 0.6775(8)  | 0.3028(7)  | 0.4925(8)  | 0.063(6)  |
| F1_25 | 0.7192(8)  | 0.3179(11) | 0.4944(11) | 0.073(6)  |
| F2_25 | 0.6655(13) | 0.2936(14) | 0.4556(9)  | 0.091(10) |
| F3_25 | 0.6573(13) | 0.2688(9)  | 0.5141(12) | 0.114(11) |
| C3_25 | 0.6280(8)  | 0.3331(9)  | 0.4966(9)  | 0.049(5)  |
| F4_25 | 0.6290(15) | 0.3695(12) | 0.5011(19) | 0.076(7)  |
| F5_25 | 0.5992(12) | 0.3060(17) | 0.5213(16) | 0.072(7)  |
| F6_25 | 0.6149(17) | 0.3194(19) | 0.4607(11) | 0.076(9)  |
| C4_25 | 0.7053(9)  | 0.3780(8)  | 0.4849(9)  | 0.059(6)  |
| F7_25 | 0.7089(16) | 0.4123(10) | 0.5006(16) | 0.080(7)  |
| F8_25 | 0.6959(16) | 0.3758(16) | 0.4475(8)  | 0.090(9)  |
| F9_25 | 0.7409(10) | 0.3777(15) | 0.4890(16) | 0.087(7)  |
| O1_26 | 0.1653(6)  | 0.2593(5)  | 0.9530(4)  | 0.030(3)  |
| C1_26 | 0.1583(4)  | 0.2905(4)  | 0.9630(4)  | 0.050(3)  |
| C2_26 | 0.1133(4)  | 0.2784(4)  | 0.9511(4)  | 0.083(3)  |
| F1_26 | 0.1049(4)  | 0.2618(5)  | 0.9155(3)  | 0.091(3)  |
| F2_26 | 0.1081(9)  | 0.3114(7)  | 0.9528(10) | 0.114(5)  |
| F3_26 | 0.0864(3)  | 0.2484(3)  | 0.9759(4)  | 0.096(3)  |
| C3_26 | 0.1622(4)  | 0.2976(4)  | 1.0078(4)  | 0.064(3)  |
| F4_26 | 0.2032(3)  | 0.3160(4)  | 1.0172(3)  | 0.113(4)  |
| F5_26 | 0.1431(4)  | 0.2608(3)  | 1.0257(3)  | 0.081(3)  |
| F6_26 | 0.1474(9)  | 0.3217(7)  | 1.0196(9)  | 0.122(4)  |
| C4_26 | 0.1890(4)  | 0.3329(5)  | 0.9441(4)  | 0.077(4)  |
| F7_26 | 0.2280(3)  | 0.3401(3)  | 0.9473(5)  | 0.106(5)  |
| F8_26 | 0.1894(8)  | 0.3648(6)  | 0.9630(5)  | 0.098(5)  |
| F9_26 | 0.1785(6)  | 0.3324(4)  | 0.9068(3)  | 0.141(6)  |
| O1_27 | 0.3797(4)  | 0.2877(5)  | 0.7537(6)  | 0.041(3)  |
| C1_27 | 0.3408(4)  | 0.2758(3)  | 0.7409(3)  | 0.052(3)  |
| C2_27 | 0.3416(5)  | 0.2798(4)  | 0.6963(4)  | 0.078(3)  |
| F1_27 | 0.3622(4)  | 0.3211(3)  | 0.6875(3)  | 0.117(3)  |
| F2_27 | 0.3034(6)  | 0.2606(8)  | 0.6815(8)  | 0.101(3)  |
| F3_27 | 0.3621(3)  | 0.2623(4)  | 0.6809(2)  | 0.079(3)  |
| C3_27 | 0.3076(4)  | 0.2309(4)  | 0.7514(4)  | 0.081(3)  |
| F4_27 | 0.3120(4)  | 0.2235(3)  | 0.7885(3)  | 0.129(5)  |
| F5_27 | 0.3111(3)  | 0.2035(3)  | 0.7278(4)  | 0.111(4)  |
| F6_27 | 0.2680(5)  | 0.2236(8)  | 0.7502(7)  | 0.117(4)  |
| C4_27 | 0.3300(4)  | 0.3078(4)  | 0.7594(4)  | 0.080(3)  |
| F7_27 | 0.3197(4)  | 0.2964(4)  | 0.7970(3)  | 0.112(4)  |
| F8_27 | 0.2995(4)  | 0.3094(6)  | 0.7401(5)  | 0.092(4)  |
| F9_27 | 0.3625(3)  | 0.3466(3)  | 0.7575(4)  | 0.096(3)  |

Table S 12 Table S 13 Atomic coordinates and  $U_{eq}$  [ $\text{\AA}^2$ ] for 7 layer.

| Atom | x           | y           | z           | $U_{eq}$   |
|------|-------------|-------------|-------------|------------|
| Fe1  | 1.22085(7)  | 0.34162(6)  | 0.53791(4)  | 0.0332(3)  |
| Fe2  | 0.29226(8)  | 0.83149(7)  | 0.71120(6)  | 0.0507(5)  |
| Fe3  | 0.78346(6)  | 0.64672(5)  | 0.37684(4)  | 0.0259(3)  |
| O1   | 1.3326(4)   | 0.2809(4)   | 0.5434(2)   | 0.050(2)   |
| C1   | 1.2873(5)   | 0.3034(5)   | 0.5409(3)   | 0.047(3)   |
| O2   | 0.2255(8)   | 0.7716(6)   | 0.7633(5)   | 0.113(6)   |
| C2   | 0.2505(10)  | 0.7962(6)   | 0.7423(5)   | 0.084(6)   |
| O3   | 0.6860(5)   | 0.7036(4)   | 0.3461(3)   | 0.068(3)   |
| C3   | 0.7242(5)   | 0.6816(4)   | 0.3586(4)   | 0.045(3)   |
| Al1  | 0.47182(12) | 0.66205(10) | 0.51762(7)  | 0.0215(5)  |
| Al2  | 1.15297(12) | 0.55398(10) | 0.37171(8)  | 0.0266(6)  |
| Al3  | 1.02291(13) | 0.16169(10) | 0.38797(7)  | 0.0236(6)  |
| Al4  | 0.84771(12) | 0.44424(11) | 0.54212(7)  | 0.0252(6)  |
| Al5  | 0.16403(11) | 0.53711(10) | 0.70696(8)  | 0.0271(5)  |
| Al6  | 1.42978(13) | 0.64450(10) | 0.20403(8)  | 0.0301(6)  |
| O1_1 | 1.0110(3)   | 0.1362(3)   | 0.42815(18) | 0.0323(15) |
| C1_1 | 0.9843(4)   | 0.1393(3)   | 0.4600(2)   | 0.033(2)   |
| C2_1 | 0.9727(4)   | 0.1946(4)   | 0.4707(2)   | 0.036(2)   |
| F1_1 | 0.9251(3)   | 0.2133(2)   | 0.45465(18) | 0.0425(15) |
| F2_1 | 0.9637(4)   | 0.1986(3)   | 0.50456(17) | 0.0505(17) |
| F3_1 | 1.0188(3)   | 0.2232(3)   | 0.46198(19) | 0.0464(16) |
| C3_1 | 1.0253(4)   | 0.1134(4)   | 0.4863(2)   | 0.038(2)   |
| F4_1 | 1.0475(3)   | 0.0710(3)   | 0.47447(19) | 0.0506(17) |
| F5_1 | 1.0698(3)   | 0.1436(3)   | 0.49452(19) | 0.0535(18) |
| F6_1 | 0.9969(4)   | 0.1034(3)   | 0.51619(18) | 0.057(2)   |
| C4_1 | 0.9242(4)   | 0.1106(3)   | 0.4581(3)   | 0.035(2)   |
| F7_1 | 0.9323(3)   | 0.0611(2)   | 0.4580(2)   | 0.0491(17) |
| F8_1 | 0.8897(3)   | 0.1208(3)   | 0.48555(18) | 0.0481(17) |
| F9_1 | 0.8940(3)   | 0.1237(3)   | 0.43023(17) | 0.0434(15) |
| O1_2 | 1.0472(3)   | 0.1143(2)   | 0.36079(19) | 0.0302(14) |
| C1_2 | 1.0399(4)   | 0.0669(3)   | 0.3503(2)   | 0.033(2)   |
| C2_2 | 1.0874(4)   | 0.0559(4)   | 0.3219(3)   | 0.041(2)   |
| F1_2 | 1.1398(3)   | 0.0476(3)   | 0.3368(2)   | 0.0523(18) |
| F2_2 | 1.0739(4)   | 0.0155(3)   | 0.3024(2)   | 0.059(2)   |
| F3_2 | 1.0934(3)   | 0.0947(3)   | 0.30064(18) | 0.0466(16) |
| C3_2 | 0.9773(4)   | 0.0596(4)   | 0.3343(3)   | 0.043(2)   |
| F4_2 | 0.9359(3)   | 0.0819(3)   | 0.3539(2)   | 0.0552(19) |
| F5_2 | 0.9751(4)   | 0.0809(4)   | 0.3030(2)   | 0.066(2)   |
| F6_2 | 0.9622(4)   | 0.0117(3)   | 0.3301(3)   | 0.066(2)   |
| C4_2 | 1.0477(5)   | 0.0288(3)   | 0.3802(3)   | 0.040(2)   |
| F7_2 | 0.9985(3)   | 0.0264(3)   | 0.39971(19) | 0.0519(18) |
| F8_2 | 1.0581(4)   | -0.0181(2)  | 0.3681(2)   | 0.061(2)   |
| F9_2 | 1.0935(3)   | 0.0426(3)   | 0.3998(2)   | 0.0546(18) |
| O1_3 | 0.9591(3)   | 0.1909(3)   | 0.3748(2)   | 0.0380(16) |
| C1_3 | 0.9341(4)   | 0.2292(4)   | 0.3567(2)   | 0.041(2)   |
| C2_3 | 0.9566(5)   | 0.2811(4)   | 0.3683(2)   | 0.049(3)   |
| F1_3 | 1.0091(4)   | 0.2924(3)   | 0.3544(2)   | 0.064(2)   |
| F2_3 | 0.9198(5)   | 0.3189(3)   | 0.3600(2)   | 0.078(3)   |
| F3_3 | 0.9623(5)   | 0.2816(3)   | 0.40244(18) | 0.065(2)   |
| C3_3 | 0.8661(5)   | 0.2260(5)   | 0.3620(3)   | 0.061(3)   |
| F4_3 | 0.8474(4)   | 0.1783(4)   | 0.3601(3)   | 0.078(3)   |
| F5_3 | 0.8503(4)   | 0.2426(4)   | 0.3931(2)   | 0.076(3)   |
| F6_3 | 0.8370(4)   | 0.2522(4)   | 0.3382(2)   | 0.082(3)   |

|        |           |           |             |            |
|--------|-----------|-----------|-------------|------------|
| C4_3   | 0.9480(5) | 0.2237(5) | 0.3174(3)   | 0.051(3)   |
| F7_3   | 0.9175(4) | 0.1855(4) | 0.3031(2)   | 0.072(2)   |
| F8_3   | 0.9353(4) | 0.2642(4) | 0.2993(2)   | 0.078(3)   |
| F9_3   | 1.0050(3) | 0.2110(3) | 0.31297(18) | 0.0549(19) |
| O1_4   | 1.0788(3) | 0.2061(2) | 0.38806(18) | 0.0289(14) |
| C1_4   | 1.1384(4) | 0.2142(3) | 0.3886(2)   | 0.037(2)   |
| C2_4   | 1.1675(5) | 0.1900(4) | 0.4204(3)   | 0.041(2)   |
| F1_4   | 1.1472(3) | 0.1445(3) | 0.4261(2)   | 0.0514(17) |
| F2_4   | 1.2264(3) | 0.1875(3) | 0.4183(2)   | 0.059(2)   |
| F3_4   | 1.1543(3) | 0.2167(3) | 0.44950(18) | 0.0522(17) |
| C3_4   | 1.1497(5) | 0.2714(4) | 0.3889(3)   | 0.045(2)   |
| F4_4   | 1.1372(4) | 0.2916(3) | 0.3574(2)   | 0.0556(19) |
| F5_4   | 1.1135(4) | 0.2931(3) | 0.4121(2)   | 0.060(2)   |
| F6_4   | 1.2064(4) | 0.2841(3) | 0.3968(2)   | 0.063(2)   |
| C4_4   | 1.1680(5) | 0.1907(4) | 0.3560(3)   | 0.045(2)   |
| F7_4   | 1.1335(3) | 0.1980(3) | 0.32823(17) | 0.0532(19) |
| F8_4   | 1.2194(4) | 0.2128(4) | 0.3481(3)   | 0.074(3)   |
| F9_4   | 1.1767(3) | 0.1420(3) | 0.3595(2)   | 0.0542(18) |
| C1_5   | 1.2056(4) | 0.3468(4) | 0.4831(3)   | 0.033(2)   |
| C2_5   | 1.1494(4) | 0.3486(4) | 0.4996(3)   | 0.041(3)   |
| C3_5   | 1.1413(4) | 0.3042(4) | 0.5195(2)   | 0.031(2)   |
| C4_5   | 1.1911(4) | 0.2735(4) | 0.5145(3)   | 0.035(2)   |
| C5_5   | 1.2307(4) | 0.2995(3) | 0.4905(2)   | 0.0261(18) |
| C6_5   | 1.2839(6) | 0.2784(5) | 0.4729(4)   | 0.058(4)   |
| H6A_5  | 1.274915  | 0.272740  | 0.448468    | 0.087      |
| H6B_5  | 1.294723  | 0.246504  | 0.483725    | 0.087      |
| H6C_5  | 1.316897  | 0.301952  | 0.474912    | 0.087      |
| C7_5   | 1.1984(6) | 0.2206(4) | 0.5270(3)   | 0.048(3)   |
| H7A_5  | 1.177586  | 0.197712  | 0.511408    | 0.073      |
| H7B_5  | 1.181850  | 0.217511  | 0.550275    | 0.073      |
| H7C_5  | 1.240545  | 0.211979  | 0.527519    | 0.073      |
| C8_5   | 1.0854(5) | 0.2887(6) | 0.5376(3)   | 0.050(3)   |
| H8A_5  | 1.065316  | 0.318507  | 0.546594    | 0.074      |
| H8B_5  | 1.095086  | 0.266151  | 0.556678    | 0.074      |
| H8C_5  | 1.059346  | 0.271493  | 0.521248    | 0.074      |
| C9_5   | 1.1018(6) | 0.3874(7) | 0.4912(4)   | 0.068(5)   |
| H9A_5  | 1.120480  | 0.419860  | 0.486847    | 0.103      |
| H9B_5  | 1.074553  | 0.390354  | 0.510790    | 0.103      |
| H9C_5  | 1.079820  | 0.376759  | 0.470719    | 0.103      |
| C10_5  | 1.2297(5) | 0.3844(5) | 0.4580(3)   | 0.044(3)   |
| H10A_5 | 1.216657  | 0.375822  | 0.434670    | 0.065      |
| H10B_5 | 1.273007  | 0.384091  | 0.458992    | 0.065      |
| H10C_5 | 1.215155  | 0.417827  | 0.464085    | 0.065      |
| C1_6   | 1.2378(4) | 0.4164(4) | 0.5536(3)   | 0.042(2)   |
| C2_6   | 1.1801(5) | 0.4031(4) | 0.5671(3)   | 0.043(2)   |
| C3_6   | 1.1899(5) | 0.3613(5) | 0.5893(3)   | 0.048(3)   |
| C4_6   | 1.2515(5) | 0.3509(4) | 0.5911(3)   | 0.044(2)   |
| C5_6   | 1.2803(4) | 0.3858(4) | 0.5687(3)   | 0.039(2)   |
| C6_6   | 1.3468(5) | 0.3948(5) | 0.5670(3)   | 0.045(3)   |
| H6A_6  | 1.367808  | 0.363442  | 0.571685    | 0.068      |
| H6B_6  | 1.358013  | 0.419873  | 0.584334    | 0.068      |
| H6C_6  | 1.357457  | 0.407041  | 0.544028    | 0.068      |
| C7_6   | 1.2789(8) | 0.3145(5) | 0.6165(3)   | 0.063(4)   |
| H7A_6  | 1.256175  | 0.283216  | 0.616481    | 0.095      |
| H7B_6  | 1.278289  | 0.329130  | 0.639653    | 0.095      |

|        |           |           |           |            |
|--------|-----------|-----------|-----------|------------|
| H7C_6  | 1.319841  | 0.307525  | 0.609739  | 0.095      |
| C8_6   | 1.1410(9) | 0.3357(7) | 0.6102(4) | 0.084(6)   |
| H8A_6  | 1.102592  | 0.350018  | 0.603967  | 0.125      |
| H8B_6  | 1.148243  | 0.340949  | 0.634883  | 0.125      |
| H8C_6  | 1.140988  | 0.299709  | 0.605246  | 0.125      |
| C9_6   | 1.1279(6) | 0.4370(6) | 0.5642(5) | 0.076(5)   |
| H9A_6  | 1.128615  | 0.453894  | 0.541759  | 0.114      |
| H9B_6  | 1.129265  | 0.462036  | 0.582639  | 0.114      |
| H9C_6  | 1.091478  | 0.417307  | 0.566241  | 0.114      |
| C10_6  | 1.2504(7) | 0.4623(5) | 0.5307(4) | 0.062(4)   |
| H10A_6 | 1.281655  | 0.454095  | 0.514123  | 0.093      |
| H10B_6 | 1.263319  | 0.490331  | 0.545202  | 0.093      |
| H10C_6 | 1.214370  | 0.471723  | 0.518284  | 0.093      |
| O1_7   | 0.8879(4) | 0.4933(3) | 0.5572(2) | 0.050(2)   |
| C1_7   | 0.9285(4) | 0.5302(3) | 0.5518(2) | 0.035(2)   |
| C2_7   | 0.9197(5) | 0.5551(4) | 0.5159(3) | 0.051(3)   |
| F1_7   | 0.8626(4) | 0.5576(5) | 0.5088(3) | 0.105(5)   |
| F2_7   | 0.9444(5) | 0.5998(3) | 0.5134(2) | 0.073(3)   |
| F3_7   | 0.9429(6) | 0.5263(4) | 0.4912(2) | 0.084(3)   |
| C3_7   | 0.9924(5) | 0.5111(5) | 0.5537(3) | 0.051(3)   |
| F4_7   | 1.0080(5) | 0.4994(4) | 0.5860(2) | 0.083(3)   |
| F5_7   | 1.0000(5) | 0.4703(4) | 0.5335(3) | 0.087(3)   |
| F6_7   | 1.0324(3) | 0.5448(4) | 0.5440(3) | 0.089(3)   |
| C4_7   | 0.9183(5) | 0.5695(4) | 0.5807(3) | 0.043(2)   |
| F7_7   | 0.9197(5) | 0.5479(3) | 0.6109(2) | 0.075(3)   |
| F8_7   | 0.9602(4) | 0.6050(3) | 0.5822(2) | 0.061(2)   |
| F9_7   | 0.8674(4) | 0.5933(4) | 0.5750(3) | 0.085(3)   |
| C1_8   | 0.7330(4) | 0.5939(4) | 0.3457(2) | 0.035(2)   |
| C2_8   | 0.7551(4) | 0.5689(3) | 0.3747(2) | 0.0331(19) |
| C3_8   | 0.8177(4) | 0.5697(4) | 0.3733(3) | 0.039(2)   |
| C4_8   | 0.8351(4) | 0.5982(4) | 0.3440(3) | 0.040(2)   |
| C5_8   | 0.7828(4) | 0.6142(4) | 0.3264(2) | 0.035(2)   |
| C6_8   | 0.7803(7) | 0.6397(4) | 0.2926(3) | 0.048(3)   |
| H6A_8  | 0.784351  | 0.614954  | 0.274128  | 0.071      |
| H6B_8  | 0.812678  | 0.664076  | 0.291035  | 0.071      |
| H6C_8  | 0.742372  | 0.657127  | 0.290273  | 0.071      |
| C7_8   | 0.8982(5) | 0.6042(5) | 0.3312(3) | 0.043(3)   |
| H7A_8  | 0.914755  | 0.571259  | 0.325784  | 0.065      |
| H7B_8  | 0.922091  | 0.620233  | 0.349172  | 0.065      |
| H7C_8  | 0.898384  | 0.625128  | 0.310437  | 0.065      |
| C8_8   | 0.8571(6) | 0.5359(5) | 0.3948(4) | 0.052(3)   |
| H8A_8  | 0.856244  | 0.501901  | 0.385238  | 0.079      |
| H8B_8  | 0.842804  | 0.535282  | 0.418600  | 0.079      |
| H8C_8  | 0.897779  | 0.548617  | 0.394275  | 0.079      |
| C9_8   | 0.7175(7) | 0.5396(5) | 0.4002(3) | 0.053(3)   |
| H9A_8  | 0.689717  | 0.518210  | 0.387571  | 0.080      |
| H9B_8  | 0.695357  | 0.563019  | 0.414769  | 0.080      |
| H9C_8  | 0.743132  | 0.518799  | 0.414651  | 0.080      |
| C10_8  | 0.6710(5) | 0.5909(5) | 0.3329(4) | 0.048(3)   |
| H10A_8 | 0.664275  | 0.617253  | 0.315778  | 0.072      |
| H10B_8 | 0.643558  | 0.595373  | 0.352246  | 0.072      |
| H10C_8 | 0.664270  | 0.558083  | 0.322286  | 0.072      |
| C1_9   | 0.7980(4) | 0.7227(3) | 0.3938(2) | 0.0292(19) |
| C2_9   | 0.7605(4) | 0.6965(4) | 0.4184(3) | 0.032(2)   |
| C3_9   | 0.7950(4) | 0.6559(4) | 0.4317(2) | 0.0303(19) |

|        |           |           |             |            |
|--------|-----------|-----------|-------------|------------|
| C4_9   | 0.8523(4) | 0.6579(4) | 0.4158(3)   | 0.039(2)   |
| C5_9   | 0.8530(4) | 0.6975(4) | 0.3913(3)   | 0.036(2)   |
| C6_9   | 0.9046(5) | 0.7166(5) | 0.3699(3)   | 0.047(3)   |
| H6A_9  | 0.891306  | 0.722483  | 0.346133    | 0.071      |
| H6B_9  | 0.936371  | 0.691707  | 0.369875    | 0.071      |
| H6C_9  | 0.919220  | 0.748059  | 0.379717    | 0.071      |
| C7_9   | 0.9070(5) | 0.6321(5) | 0.4297(3)   | 0.050(3)   |
| H7A_9  | 0.930103  | 0.618474  | 0.410438    | 0.075      |
| H7B_9  | 0.895197  | 0.604740  | 0.445070    | 0.075      |
| H7C_9  | 0.931084  | 0.656253  | 0.442463    | 0.075      |
| C8_9   | 0.7736(7) | 0.6216(5) | 0.4604(3)   | 0.050(3)   |
| H8A_9  | 0.730869  | 0.616497  | 0.458217    | 0.075      |
| H8B_9  | 0.782385  | 0.636881  | 0.482795    | 0.075      |
| H8C_9  | 0.793906  | 0.589231  | 0.458694    | 0.075      |
| C9_9   | 0.7035(5) | 0.7150(4) | 0.4331(3)   | 0.042(3)   |
| H9A_9  | 0.681676  | 0.733541  | 0.415401    | 0.062      |
| H9B_9  | 0.711592  | 0.737132  | 0.452719    | 0.062      |
| H9C_9  | 0.679723  | 0.686454  | 0.440896    | 0.062      |
| C10_9  | 0.7865(6) | 0.7736(4) | 0.3780(4)   | 0.045(3)   |
| H10A_9 | 0.804481  | 0.775094  | 0.355018    | 0.068      |
| H10B_9 | 0.803870  | 0.799635  | 0.392662    | 0.068      |
| H10C_9 | 0.743776  | 0.779061  | 0.376074    | 0.068      |
| O1_11  | 1.4697(6) | 0.6543(6) | 0.2419(4)   | 0.042(4)   |
| C1_11  | 1.5187(6) | 0.6457(5) | 0.2608(3)   | 0.057(3)   |
| C2_11  | 1.5437(6) | 0.5919(6) | 0.2544(4)   | 0.061(4)   |
| F1_11  | 1.5097(6) | 0.5589(6) | 0.2706(5)   | 0.105(5)   |
| F2_11  | 1.5988(4) | 0.5853(5) | 0.2636(3)   | 0.064(3)   |
| F3_11  | 1.5382(6) | 0.5802(6) | 0.2211(3)   | 0.077(4)   |
| C3_11  | 1.5661(7) | 0.6842(6) | 0.2506(5)   | 0.080(5)   |
| F4_11  | 1.5423(6) | 0.7302(5) | 0.2481(6)   | 0.118(6)   |
| F5_11  | 1.5881(6) | 0.6749(7) | 0.2202(4)   | 0.097(5)   |
| F6_11  | 1.6125(6) | 0.6840(5) | 0.2714(4)   | 0.091(4)   |
| C4_11  | 1.5049(8) | 0.6544(8) | 0.2994(4)   | 0.095(6)   |
| F7_11  | 1.5025(9) | 0.7029(8) | 0.3066(5)   | 0.148(8)   |
| F8_11  | 1.5472(6) | 0.6327(9) | 0.3186(3)   | 0.128(8)   |
| F9_11  | 1.4534(6) | 0.6319(9) | 0.3080(3)   | 0.130(7)   |
| O1_12  | 1.3647(3) | 0.6787(3) | 0.2077(2)   | 0.0380(15) |
| C1_12  | 1.3394(5) | 0.7202(4) | 0.2221(3)   | 0.046(2)   |
| C2_12  | 1.2770(5) | 0.7258(5) | 0.2066(4)   | 0.061(3)   |
| F1_12  | 1.2801(4) | 0.7214(4) | 0.1726(2)   | 0.079(3)   |
| F2_12  | 1.2546(5) | 0.7727(4) | 0.2127(3)   | 0.091(3)   |
| F3_12  | 1.2397(4) | 0.6917(4) | 0.2187(4)   | 0.095(4)   |
| C3_12  | 1.3345(5) | 0.7150(4) | 0.2624(3)   | 0.054(3)   |
| F4_12  | 1.3848(5) | 0.7293(4) | 0.2781(2)   | 0.086(3)   |
| F5_12  | 1.3224(5) | 0.6691(3) | 0.2712(2)   | 0.080(3)   |
| F6_12  | 1.2930(5) | 0.7441(3) | 0.2763(3)   | 0.081(3)   |
| C4_12  | 1.3760(6) | 0.7686(4) | 0.2151(3)   | 0.064(3)   |
| F7_12  | 1.4356(4) | 0.7605(4) | 0.2186(3)   | 0.081(3)   |
| F8_12  | 1.3586(6) | 0.8075(4) | 0.2341(3)   | 0.089(3)   |
| F9_12  | 1.3717(6) | 0.7822(4) | 0.1818(2)   | 0.091(3)   |
| O1_14  | 0.4462(3) | 0.6131(2) | 0.54308(18) | 0.0264(14) |
| C1_14  | 0.4481(4) | 0.5632(3) | 0.5495(3)   | 0.041(2)   |
| C2_14  | 0.5117(6) | 0.5482(5) | 0.5593(5)   | 0.095(5)   |
| F1_14  | 0.5515(4) | 0.5706(4) | 0.5392(4)   | 0.112(5)   |
| F2_14  | 0.5218(6) | 0.4988(4) | 0.5574(5)   | 0.146(7)   |

|       |            |            |             |            |
|-------|------------|------------|-------------|------------|
| F3_14 | 0.5254(5)  | 0.5638(5)  | 0.5908(4)   | 0.123(5)   |
| C3_14 | 0.4069(5)  | 0.5509(4)  | 0.5799(3)   | 0.045(2)   |
| F4_14 | 0.3501(3)  | 0.5496(3)  | 0.5699(2)   | 0.0527(18) |
| F5_14 | 0.4085(5)  | 0.5865(3)  | 0.60452(18) | 0.065(2)   |
| F6_14 | 0.4169(4)  | 0.5067(3)  | 0.5936(2)   | 0.064(2)   |
| C4_14 | 0.4279(6)  | 0.5335(4)  | 0.5170(3)   | 0.062(3)   |
| F7_14 | 0.3814(5)  | 0.5548(4)  | 0.5017(2)   | 0.075(3)   |
| F8_14 | 0.4124(5)  | 0.4860(3)  | 0.5255(3)   | 0.086(4)   |
| F9_14 | 0.4726(6)  | 0.5295(3)  | 0.4951(3)   | 0.104(5)   |
| O1_15 | 0.8706(11) | 0.4242(8)  | 0.5033(4)   | 0.042(5)   |
| C1_15 | 0.8873(5)  | 0.3900(5)  | 0.4793(3)   | 0.028(3)   |
| C2_15 | 0.9276(8)  | 0.4130(7)  | 0.4512(5)   | 0.035(3)   |
| F1_15 | 0.9044(6)  | 0.4566(5)  | 0.4396(5)   | 0.040(3)   |
| F2_15 | 0.9337(10) | 0.3829(10) | 0.4243(6)   | 0.047(4)   |
| F3_15 | 0.9812(8)  | 0.4224(11) | 0.4632(5)   | 0.041(4)   |
| C3_15 | 0.9202(6)  | 0.3461(5)  | 0.4971(4)   | 0.037(3)   |
| F4_15 | 0.8855(5)  | 0.3149(3)  | 0.5126(3)   | 0.044(2)   |
| F5_15 | 0.9592(4)  | 0.3636(4)  | 0.5202(3)   | 0.046(2)   |
| F6_15 | 0.9539(5)  | 0.3203(4)  | 0.4747(3)   | 0.054(3)   |
| C4_15 | 0.8308(6)  | 0.3680(5)  | 0.4621(4)   | 0.043(3)   |
| F7_15 | 0.7894(4)  | 0.3570(5)  | 0.4854(3)   | 0.052(3)   |
| F8_15 | 0.8427(5)  | 0.3246(4)  | 0.4448(3)   | 0.047(3)   |
| F9_15 | 0.8057(5)  | 0.4007(5)  | 0.4398(3)   | 0.052(3)   |
| O1_16 | 1.2252(3)  | 0.5358(4)  | 0.3800(3)   | 0.061(3)   |
| C1_16 | 1.2805(4)  | 0.5247(3)  | 0.3704(2)   | 0.032(2)   |
| C2_16 | 1.2800(5)  | 0.4840(4)  | 0.3421(3)   | 0.047(3)   |
| F1_16 | 1.2385(3)  | 0.4938(4)  | 0.3182(2)   | 0.076(3)   |
| F2_16 | 1.3314(3)  | 0.4780(4)  | 0.3268(2)   | 0.067(2)   |
| F3_16 | 1.2639(6)  | 0.4386(4)  | 0.3546(3)   | 0.093(3)   |
| C3_16 | 1.3149(5)  | 0.5042(5)  | 0.4022(3)   | 0.052(3)   |
| F4_16 | 1.3247(4)  | 0.5410(4)  | 0.4244(2)   | 0.075(3)   |
| F5_16 | 1.2835(4)  | 0.4686(4)  | 0.4183(3)   | 0.079(3)   |
| F6_16 | 1.3668(4)  | 0.4844(4)  | 0.3935(3)   | 0.075(3)   |
| C4_16 | 1.3126(5)  | 0.5714(4)  | 0.3555(3)   | 0.050(3)   |
| F7_16 | 1.3005(6)  | 0.6108(3)  | 0.3755(3)   | 0.100(4)   |
| F8_16 | 1.3717(3)  | 0.5657(3)  | 0.3559(2)   | 0.062(2)   |
| F9_16 | 1.2943(5)  | 0.5825(4)  | 0.3238(2)   | 0.083(3)   |
| O1_17 | 1.1364(14) | 0.6003(9)  | 0.3431(6)   | 0.062(7)   |
| C1_17 | 1.1260(8)  | 0.6236(7)  | 0.3123(5)   | 0.040(4)   |
| C2_17 | 1.1501(9)  | 0.6779(7)  | 0.3125(5)   | 0.045(4)   |
| F1_17 | 1.1240(10) | 0.7045(6)  | 0.3367(5)   | 0.067(4)   |
| F2_17 | 1.141(2)   | 0.7027(15) | 0.2827(8)   | 0.070(5)   |
| F3_17 | 1.2081(11) | 0.6796(17) | 0.3182(10)  | 0.071(6)   |
| C3_17 | 1.1450(7)  | 0.5948(7)  | 0.2801(4)   | 0.040(4)   |
| F4_17 | 1.1345(16) | 0.5458(7)  | 0.2827(11)  | 0.069(5)   |
| F5_17 | 1.2019(6)  | 0.6021(9)  | 0.2730(5)   | 0.069(5)   |
| F6_17 | 1.1194(9)  | 0.6100(7)  | 0.2509(4)   | 0.061(4)   |
| C4_17 | 1.0575(8)  | 0.6261(8)  | 0.3132(6)   | 0.064(5)   |
| F7_17 | 1.0341(11) | 0.5818(9)  | 0.3045(9)   | 0.063(6)   |
| F8_17 | 1.0371(9)  | 0.6594(7)  | 0.2908(7)   | 0.083(5)   |
| F9_17 | 1.0411(14) | 0.6337(13) | 0.3461(6)   | 0.084(6)   |
| O1_18 | 0.8494(6)  | 0.3949(5)  | 0.5708(3)   | 0.045(3)   |
| C1_18 | 0.8616(5)  | 0.3753(4)  | 0.6022(3)   | 0.034(2)   |
| C2_18 | 0.8165(6)  | 0.3339(5)  | 0.6091(3)   | 0.046(3)   |
| F1_18 | 0.8076(6)  | 0.3061(4)  | 0.5806(3)   | 0.070(3)   |

|         |            |            |           |          |
|---------|------------|------------|-----------|----------|
| F2_18   | 0.8343(7)  | 0.3030(5)  | 0.6347(4) | 0.076(4) |
| F3_18   | 0.7642(5)  | 0.3533(5)  | 0.6186(4) | 0.095(4) |
| C3_18   | 0.8557(5)  | 0.4158(4)  | 0.6304(3) | 0.039(3) |
| F4_18   | 0.9039(4)  | 0.4457(3)  | 0.6312(2) | 0.060(3) |
| F5_18   | 0.8113(5)  | 0.4456(4)  | 0.6230(3) | 0.060(2) |
| F6_18   | 0.8504(7)  | 0.3989(4)  | 0.6622(2) | 0.081(4) |
| C4_18   | 0.9256(6)  | 0.3538(6)  | 0.6037(4) | 0.073(4) |
| F7_18   | 0.9654(5)  | 0.3842(5)  | 0.5912(5) | 0.108(5) |
| F8_18   | 0.9425(7)  | 0.3428(6)  | 0.6356(4) | 0.111(5) |
| F9_18   | 0.9275(7)  | 0.3113(4)  | 0.5854(4) | 0.093(4) |
| C1_19   | 0.3362(6)  | 0.7604(4)  | 0.7159(3) | 0.053(3) |
| C2_19   | 0.3648(7)  | 0.7969(5)  | 0.7370(3) | 0.059(3) |
| C3_19   | 0.3879(6)  | 0.8342(4)  | 0.7146(3) | 0.053(3) |
| C4_19   | 0.3725(6)  | 0.8222(5)  | 0.6811(3) | 0.056(3) |
| C5_19   | 0.3373(7)  | 0.7779(5)  | 0.6815(3) | 0.064(3) |
| C6_19   | 0.3164(8)  | 0.7501(7)  | 0.6499(4) | 0.074(4) |
| H6A_19  | 0.316759   | 0.772715   | 0.629980  | 0.110    |
| H6B_19  | 0.276137   | 0.737734   | 0.653683  | 0.110    |
| H6C_19  | 0.342869   | 0.721727   | 0.645415  | 0.110    |
| C7_19   | 0.3990(8)  | 0.8444(7)  | 0.6485(4) | 0.073(5) |
| H7A_19  | 0.429135   | 0.821681   | 0.639337  | 0.109    |
| H7B_19  | 0.417104   | 0.876848   | 0.653837  | 0.109    |
| H7C_19  | 0.367745   | 0.849116   | 0.631247  | 0.109    |
| C8_19   | 0.4294(7)  | 0.8756(6)  | 0.7259(5) | 0.071(4) |
| H8A_19  | 0.442254   | 0.894745   | 0.705659  | 0.107    |
| H8B_19  | 0.464040   | 0.860979   | 0.737295  | 0.107    |
| H8C_19  | 0.408874   | 0.897911   | 0.741983  | 0.107    |
| C9_19   | 0.3765(11) | 0.7924(7)  | 0.7757(4) | 0.086(6) |
| H9A_19  | 0.415908   | 0.778223   | 0.779417  | 0.129    |
| H9B_19  | 0.346639   | 0.770514   | 0.786084  | 0.129    |
| H9C_19  | 0.374299   | 0.825671   | 0.786267  | 0.129    |
| C10_19  | 0.3173(8)  | 0.7081(5)  | 0.7254(5) | 0.068(4) |
| H10A_19 | 0.279056   | 0.700666   | 0.714718  | 0.102    |
| H10B_19 | 0.313708   | 0.705479   | 0.750548  | 0.102    |
| H10C_19 | 0.346955   | 0.684097   | 0.717225  | 0.102    |
| O1_20   | 0.1660(7)  | 0.5863(5)  | 0.6785(4) | 0.057(3) |
| C1_20   | 0.1385(5)  | 0.6252(5)  | 0.6611(3) | 0.059(3) |
| C2_20   | 0.1843(6)  | 0.6470(6)  | 0.6350(4) | 0.071(4) |
| F1_20   | 0.2396(5)  | 0.6482(5)  | 0.6490(3) | 0.072(3) |
| F2_20   | 0.1708(7)  | 0.6930(6)  | 0.6247(5) | 0.100(5) |
| F3_20   | 0.1875(7)  | 0.6183(5)  | 0.6073(3) | 0.095(4) |
| C3_20   | 0.0829(6)  | 0.6068(6)  | 0.6410(4) | 0.080(4) |
| F4_20   | 0.0379(4)  | 0.6003(5)  | 0.6624(4) | 0.095(4) |
| F5_20   | 0.0961(6)  | 0.5632(5)  | 0.6273(3) | 0.100(4) |
| F6_20   | 0.0684(6)  | 0.6389(6)  | 0.6174(4) | 0.117(7) |
| C4_20   | 0.1208(6)  | 0.6680(5)  | 0.6866(4) | 0.069(4) |
| F7_20   | 0.0950(5)  | 0.6455(4)  | 0.7134(4) | 0.085(4) |
| F8_20   | 0.0843(5)  | 0.7014(5)  | 0.6733(4) | 0.088(4) |
| F9_20   | 0.1685(4)  | 0.6927(4)  | 0.6982(3) | 0.073(3) |
| O1_21   | 1.1227(12) | 0.5687(11) | 0.4111(5) | 0.044(5) |
| C1_21   | 1.1281(7)  | 0.5954(6)  | 0.4409(4) | 0.051(4) |
| C2_21   | 1.0766(8)  | 0.5791(6)  | 0.4644(4) | 0.062(4) |
| F1_21   | 1.0256(8)  | 0.5746(8)  | 0.4467(8) | 0.080(5) |
| F2_21   | 1.0708(16) | 0.6079(8)  | 0.4922(5) | 0.104(6) |
| F3_21   | 1.0847(11) | 0.5324(7)  | 0.4760(8) | 0.088(5) |

|       |            |            |            |            |
|-------|------------|------------|------------|------------|
| C3_21 | 1.1865(8)  | 0.5822(7)  | 0.4601(4)  | 0.071(5)   |
| F4_21 | 1.2306(6)  | 0.6063(7)  | 0.4441(4)  | 0.076(4)   |
| F5_21 | 1.1965(7)  | 0.5327(6)  | 0.4584(5)  | 0.069(4)   |
| F6_21 | 1.1822(10) | 0.5948(9)  | 0.4934(4)  | 0.111(7)   |
| C4_21 | 1.1236(10) | 0.6521(6)  | 0.4342(5)  | 0.085(6)   |
| F7_21 | 1.1608(10) | 0.6648(5)  | 0.4093(4)  | 0.087(6)   |
| F8_21 | 1.1424(11) | 0.6786(8)  | 0.4622(6)  | 0.114(8)   |
| F9_21 | 1.0692(10) | 0.6667(8)  | 0.4271(7)  | 0.115(7)   |
| C1_22 | 0.4833(6)  | 0.6977(5)  | 0.7173(3)  | 0.063(3)   |
| C2_22 | 0.4696(5)  | 0.6965(5)  | 0.6826(3)  | 0.054(3)   |
| C3_22 | 0.4581(8)  | 0.6526(5)  | 0.6656(4)  | 0.079(5)   |
| H3_22 | 0.448059   | 0.652500   | 0.641839   | 0.095      |
| C4_22 | 0.4614(11) | 0.6078(6)  | 0.6843(4)  | 0.094(6)   |
| H4_22 | 0.457893   | 0.576597   | 0.672723   | 0.113      |
| C5_22 | 0.4698(9)  | 0.6091(6)  | 0.7196(4)  | 0.073(4)   |
| H5_22 | 0.468570   | 0.578943   | 0.732534   | 0.088      |
| C6_22 | 0.4801(9)  | 0.6545(5)  | 0.7364(4)  | 0.079(5)   |
| H6_22 | 0.484854   | 0.655530   | 0.760744   | 0.095      |
| F1_22 | 0.4892(7)  | 0.7423(4)  | 0.7335(3)  | 0.107(4)   |
| F2_22 | 0.4685(5)  | 0.7416(4)  | 0.6649(3)  | 0.085(3)   |
| O1_23 | 0.7732(6)  | 0.4495(9)  | 0.5420(6)  | 0.045(5)   |
| C1_23 | 0.7208(8)  | 0.4754(7)  | 0.5389(5)  | 0.033(4)   |
| C2_23 | 0.7177(11) | 0.5240(9)  | 0.5597(7)  | 0.062(6)   |
| F1_23 | 0.7284(11) | 0.5667(10) | 0.5421(11) | 0.080(6)   |
| F2_23 | 0.6663(10) | 0.5311(11) | 0.5766(8)  | 0.075(6)   |
| F3_23 | 0.7594(13) | 0.5224(16) | 0.5849(8)  | 0.079(6)   |
| C3_23 | 0.6730(10) | 0.4398(8)  | 0.5537(6)  | 0.048(5)   |
| F4_23 | 0.6824(10) | 0.3925(8)  | 0.5464(7)  | 0.063(5)   |
| F5_23 | 0.6723(11) | 0.4439(12) | 0.5884(5)  | 0.075(6)   |
| F6_23 | 0.6195(8)  | 0.4521(9)  | 0.5427(7)  | 0.067(5)   |
| C4_23 | 0.7123(9)  | 0.4818(8)  | 0.4996(5)  | 0.051(5)   |
| F7_23 | 0.6990(12) | 0.4364(8)  | 0.4866(7)  | 0.062(5)   |
| F8_23 | 0.6665(8)  | 0.5113(7)  | 0.4916(5)  | 0.061(4)   |
| F9_23 | 0.7598(8)  | 0.5000(8)  | 0.4837(5)  | 0.066(5)   |
| O1_24 | 0.1020(8)  | 0.5031(8)  | 0.6966(5)  | 0.0375(18) |
| C1_24 | 0.0581(6)  | 0.4726(5)  | 0.7085(3)  | 0.029(3)   |
| C2_24 | 0.0848(6)  | 0.4221(5)  | 0.7198(3)  | 0.041(3)   |
| F1_24 | 0.0986(8)  | 0.3937(6)  | 0.6923(3)  | 0.061(4)   |
| F2_24 | 0.0461(13) | 0.3941(7)  | 0.7384(5)  | 0.046(4)   |
| F3_24 | 0.1324(8)  | 0.4286(12) | 0.7397(6)  | 0.048(3)   |
| C3_24 | 0.0261(6)  | 0.4976(5)  | 0.7397(3)  | 0.042(3)   |
| F4_24 | 0.0246(7)  | 0.5472(5)  | 0.7354(4)  | 0.051(3)   |
| F5_24 | 0.0559(5)  | 0.4888(5)  | 0.7691(3)  | 0.045(3)   |
| F6_24 | -0.0281(5) | 0.4821(5)  | 0.7431(3)  | 0.049(3)   |
| C4_24 | 0.0130(6)  | 0.4652(5)  | 0.6789(3)  | 0.044(3)   |
| F7_24 | -0.0194(9) | 0.5065(7)  | 0.6735(4)  | 0.060(4)   |
| F8_24 | -0.0221(5) | 0.4270(5)  | 0.6850(3)  | 0.057(3)   |
| F9_24 | 0.0410(8)  | 0.4569(7)  | 0.6488(3)  | 0.060(4)   |
| O1_25 | 0.1600(14) | 0.5592(13) | 0.7483(5)  | 0.045(7)   |
| C1_25 | 0.1868(8)  | 0.5729(7)  | 0.7785(5)  | 0.034(4)   |
| C2_25 | 0.2511(8)  | 0.5890(7)  | 0.7696(5)  | 0.040(4)   |
| F1_25 | 0.2519(18) | 0.6097(14) | 0.7381(6)  | 0.052(5)   |
| F2_25 | 0.2744(13) | 0.6220(12) | 0.7916(7)  | 0.049(6)   |
| F3_25 | 0.2896(7)  | 0.5505(7)  | 0.7681(5)  | 0.044(4)   |
| C3_25 | 0.1892(9)  | 0.5299(8)  | 0.8054(5)  | 0.044(4)   |



|         |            |            |             |            |
|---------|------------|------------|-------------|------------|
| F4_25   | 0.1375(10) | 0.5203(11) | 0.8202(8)   | 0.064(6)   |
| F5_25   | 0.2062(15) | 0.4860(9)  | 0.7916(9)   | 0.046(5)   |
| F6_25   | 0.2287(15) | 0.5413(15) | 0.8303(7)   | 0.056(7)   |
| C4_25   | 0.1502(10) | 0.6180(8)  | 0.7920(6)   | 0.063(5)   |
| F7_25   | 0.0930(10) | 0.6072(15) | 0.7907(14)  | 0.078(6)   |
| F8_25   | 0.1641(17) | 0.6291(11) | 0.8246(6)   | 0.083(7)   |
| F9_25   | 0.1595(12) | 0.6589(9)  | 0.7730(8)   | 0.083(6)   |
| O1_26   | 1.4075(5)  | 0.5827(4)  | 0.1996(4)   | 0.041(3)   |
| C1_26   | 1.3687(5)  | 0.5449(4)  | 0.2039(3)   | 0.037(3)   |
| C2_26   | 1.3702(7)  | 0.5289(6)  | 0.2422(3)   | 0.062(4)   |
| F1_26   | 1.4143(6)  | 0.4984(5)  | 0.2491(3)   | 0.078(3)   |
| F2_26   | 1.3207(6)  | 0.5016(5)  | 0.2498(3)   | 0.084(4)   |
| F3_26   | 1.3728(7)  | 0.5675(4)  | 0.2635(3)   | 0.070(3)   |
| C3_26   | 1.3052(6)  | 0.5632(5)  | 0.1949(4)   | 0.059(4)   |
| F4_26   | 1.3054(6)  | 0.5917(5)  | 0.1666(3)   | 0.073(3)   |
| F5_26   | 1.2799(5)  | 0.5911(5)  | 0.2186(4)   | 0.080(4)   |
| F6_26   | 1.2687(5)  | 0.5235(4)  | 0.1894(3)   | 0.068(3)   |
| C4_26   | 1.3836(7)  | 0.5004(5)  | 0.1805(4)   | 0.058(4)   |
| F7_26   | 1.3681(8)  | 0.5090(6)  | 0.1479(3)   | 0.083(5)   |
| F8_26   | 1.3594(7)  | 0.4571(4)  | 0.1895(4)   | 0.074(4)   |
| F9_26   | 1.4428(6)  | 0.4924(4)  | 0.1794(4)   | 0.074(3)   |
| C1_27   | 0.2762(5)  | 0.9091(5)  | 0.7221(3)   | 0.048(3)   |
| C2_27   | 0.2256(7)  | 0.8804(6)  | 0.7334(3)   | 0.066(4)   |
| C3_27   | 0.2014(6)  | 0.8549(5)  | 0.7041(4)   | 0.064(3)   |
| C4_27   | 0.2348(6)  | 0.8702(6)  | 0.6750(3)   | 0.059(3)   |
| C5_27   | 0.2783(5)  | 0.9040(5)  | 0.6858(3)   | 0.046(3)   |
| C6_27   | 0.3131(9)  | 0.9385(6)  | 0.6627(5)   | 0.078(5)   |
| H6A_27  | 0.329095   | 0.919407   | 0.643232    | 0.117      |
| H6B_27  | 0.345701   | 0.953410   | 0.675801    | 0.117      |
| H6C_27  | 0.287126   | 0.965034   | 0.654052    | 0.117      |
| C7_27   | 0.2203(12) | 0.8576(10) | 0.6376(4)   | 0.109(8)   |
| H7A_27  | 0.193633   | 0.883163   | 0.628206    | 0.163      |
| H7B_27  | 0.200952   | 0.824802   | 0.636531    | 0.163      |
| H7C_27  | 0.256815   | 0.856820   | 0.624027    | 0.163      |
| C8_27   | 0.1447(7)  | 0.8246(7)  | 0.7020(9)   | 0.121(10)  |
| H8A_27  | 0.126632   | 0.822457   | 0.724886    | 0.181      |
| H8B_27  | 0.153794   | 0.790763   | 0.693649    | 0.181      |
| H8C_27  | 0.117215   | 0.840848   | 0.685998    | 0.181      |
| C9_27   | 0.2007(13) | 0.8865(7)  | 0.7688(5)   | 0.116(9)   |
| H9A_27  | 0.194711   | 0.922197   | 0.773644    | 0.173      |
| H9B_27  | 0.228240   | 0.872418   | 0.785715    | 0.173      |
| H9C_27  | 0.162676   | 0.868979   | 0.770327    | 0.173      |
| C10_27  | 0.3095(8)  | 0.9479(6)  | 0.7426(5)   | 0.076(5)   |
| H10A_27 | 0.343248   | 0.959953   | 0.729107    | 0.114      |
| H10B_27 | 0.323766   | 0.932922   | 0.764140    | 0.114      |
| H10C_27 | 0.283142   | 0.975971   | 0.747915    | 0.114      |
| O1_28   | 0.4198(3)  | 0.7096(3)  | 0.5217(2)   | 0.0373(17) |
| C1_28   | 0.3623(4)  | 0.7203(4)  | 0.5247(3)   | 0.047(2)   |
| C2_28   | 0.3308(5)  | 0.6923(4)  | 0.5559(3)   | 0.052(3)   |
| F1_28   | 0.3172(3)  | 0.6452(3)  | 0.5478(2)   | 0.060(2)   |
| F2_28   | 0.2816(4)  | 0.7159(4)  | 0.5664(3)   | 0.080(3)   |
| F3_28   | 0.3671(3)  | 0.6914(3)  | 0.58210(18) | 0.0562(19) |
| C3_28   | 0.3556(6)  | 0.7772(5)  | 0.5302(4)   | 0.079(4)   |
| F4_28   | 0.3889(6)  | 0.8017(4)  | 0.5080(4)   | 0.112(5)   |
| F5_28   | 0.3719(6)  | 0.7892(4)  | 0.5627(3)   | 0.098(3)   |

|       |            |            |             |            |
|-------|------------|------------|-------------|------------|
| F6_28 | 0.3011(5)  | 0.7948(5)  | 0.5260(4)   | 0.136(6)   |
| C4_28 | 0.3281(6)  | 0.7047(6)  | 0.4919(3)   | 0.077(4)   |
| F7_28 | 0.3411(5)  | 0.7358(6)  | 0.4650(2)   | 0.113(5)   |
| F8_28 | 0.2691(4)  | 0.7052(5)  | 0.4950(3)   | 0.100(4)   |
| F9_28 | 0.3435(4)  | 0.6588(4)  | 0.4816(3)   | 0.082(3)   |
| O1_29 | 0.2294(3)  | 0.5035(3)  | 0.70423(19) | 0.0386(16) |
| C1_29 | 0.2710(4)  | 0.4849(4)  | 0.6828(3)   | 0.052(3)   |
| C2_29 | 0.2791(6)  | 0.4286(5)  | 0.6911(4)   | 0.088(4)   |
| F1_29 | 0.2323(5)  | 0.4031(5)  | 0.6793(5)   | 0.126(5)   |
| F2_29 | 0.3282(5)  | 0.4086(4)  | 0.6803(5)   | 0.126(6)   |
| F3_29 | 0.2765(6)  | 0.4207(4)  | 0.7254(3)   | 0.110(4)   |
| C3_29 | 0.3322(5)  | 0.5109(5)  | 0.6890(3)   | 0.062(3)   |
| F4_29 | 0.3223(5)  | 0.5603(4)  | 0.6887(3)   | 0.082(3)   |
| F5_29 | 0.3539(4)  | 0.4986(4)  | 0.7193(2)   | 0.076(3)   |
| F6_29 | 0.3701(4)  | 0.5023(4)  | 0.6637(3)   | 0.085(3)   |
| C4_29 | 0.2557(6)  | 0.4907(7)  | 0.6437(3)   | 0.099(5)   |
| F7_29 | 0.2651(5)  | 0.5375(6)  | 0.6326(3)   | 0.120(5)   |
| F8_29 | 0.2851(5)  | 0.4591(7)  | 0.6240(3)   | 0.140(6)   |
| F9_29 | 0.1978(5)  | 0.4808(8)  | 0.6400(4)   | 0.142(7)   |
| O1_30 | 0.5394(5)  | 0.6872(5)  | 0.5296(4)   | 0.031(3)   |
| C1_30 | 0.5712(5)  | 0.7165(5)  | 0.5511(3)   | 0.046(3)   |
| C2_30 | 0.5588(7)  | 0.7027(7)  | 0.5897(4)   | 0.070(4)   |
| F1_30 | 0.5843(6)  | 0.6604(6)  | 0.5982(3)   | 0.093(4)   |
| F2_30 | 0.5763(9)  | 0.7370(8)  | 0.6117(4)   | 0.104(5)   |
| F3_30 | 0.4993(5)  | 0.6978(6)  | 0.5943(3)   | 0.070(4)   |
| C3_30 | 0.5541(7)  | 0.7719(5)  | 0.5462(4)   | 0.062(4)   |
| F4_30 | 0.5455(8)  | 0.7815(6)  | 0.5120(3)   | 0.077(4)   |
| F5_30 | 0.5019(6)  | 0.7837(5)  | 0.5618(4)   | 0.095(5)   |
| F6_30 | 0.5981(8)  | 0.8025(6)  | 0.5572(5)   | 0.084(5)   |
| C4_30 | 0.6389(5)  | 0.7080(6)  | 0.5434(3)   | 0.058(3)   |
| F7_30 | 0.6514(5)  | 0.7339(6)  | 0.5144(3)   | 0.076(4)   |
| F8_30 | 0.6753(6)  | 0.7238(6)  | 0.5684(3)   | 0.079(4)   |
| F9_30 | 0.6488(5)  | 0.6592(5)  | 0.5400(4)   | 0.078(4)   |
| O1_31 | 1.4678(14) | 0.6612(12) | 0.1675(5)   | 0.042(5)   |
| C1_31 | 1.4755(7)  | 0.6614(6)  | 0.1332(5)   | 0.053(4)   |
| C2_31 | 1.4986(7)  | 0.6090(6)  | 0.1219(5)   | 0.049(4)   |
| F1_31 | 1.4522(6)  | 0.5772(5)  | 0.1203(3)   | 0.058(4)   |
| F2_31 | 1.5221(14) | 0.6105(12) | 0.0903(5)   | 0.061(4)   |
| F3_31 | 1.5382(8)  | 0.5907(7)  | 0.1447(4)   | 0.074(4)   |
| C3_31 | 1.5221(11) | 0.7007(8)  | 0.1232(6)   | 0.107(7)   |
| F4_31 | 1.5103(19) | 0.7443(8)  | 0.1397(9)   | 0.185(17)  |
| F5_31 | 1.5776(9)  | 0.6874(9)  | 0.1319(6)   | 0.140(8)   |
| F6_31 | 1.5188(14) | 0.7099(13) | 0.0891(5)   | 0.125(9)   |
| C4_31 | 1.4155(8)  | 0.6725(8)  | 0.1154(6)   | 0.068(5)   |
| F7_31 | 1.3935(10) | 0.7178(7)  | 0.1181(5)   | 0.094(5)   |
| F8_31 | 1.4192(16) | 0.6639(14) | 0.0813(5)   | 0.099(7)   |
| F9_31 | 1.3722(5)  | 0.6449(7)  | 0.1294(3)   | 0.066(4)   |
| O1_10 | 1.1178(10) | 0.5002(7)  | 0.3580(7)   | 0.042(6)   |
| C1_10 | 1.0790(7)  | 0.4630(6)  | 0.3627(4)   | 0.032(3)   |
| C2_10 | 1.0723(8)  | 0.4321(7)  | 0.3289(4)   | 0.059(4)   |
| F1_10 | 1.1264(7)  | 0.4270(6)  | 0.3142(4)   | 0.073(4)   |
| F2_10 | 1.0516(11) | 0.3855(8)  | 0.3344(7)   | 0.069(6)   |
| F3_10 | 1.0381(9)  | 0.4562(6)  | 0.3065(4)   | 0.088(6)   |
| C3_10 | 1.0180(7)  | 0.4812(6)  | 0.3753(5)   | 0.052(4)   |
| F4_10 | 1.0185(5)  | 0.4923(5)  | 0.4084(4)   | 0.064(4)   |

|       |            |            |             |            |
|-------|------------|------------|-------------|------------|
| F5_10 | 0.9999(8)  | 0.5214(7)  | 0.3581(7)   | 0.092(6)   |
| F6_10 | 0.9769(12) | 0.4456(11) | 0.3708(9)   | 0.066(5)   |
| C4_10 | 1.1044(7)  | 0.4277(5)  | 0.3905(4)   | 0.035(3)   |
| F7_10 | 1.1230(7)  | 0.4550(5)  | 0.4177(3)   | 0.056(3)   |
| F8_10 | 1.0657(10) | 0.3949(7)  | 0.4038(4)   | 0.049(4)   |
| F9_10 | 1.1503(5)  | 0.4016(5)  | 0.3779(4)   | 0.064(4)   |
| O1_32 | 0.1562(11) | 0.5543(9)  | 0.7502(3)   | 0.032(5)   |
| C1_32 | 0.1841(7)  | 0.5700(6)  | 0.7797(4)   | 0.034(4)   |
| C2_32 | 0.2242(7)  | 0.5266(6)  | 0.7932(4)   | 0.037(4)   |
| F1_32 | 0.2760(5)  | 0.5256(6)  | 0.7768(3)   | 0.043(3)   |
| F2_32 | 0.2376(12) | 0.5292(11) | 0.8267(5)   | 0.048(5)   |
| F3_32 | 0.1969(13) | 0.4830(8)  | 0.7858(9)   | 0.057(6)   |
| C3_32 | 0.1372(7)  | 0.5806(7)  | 0.8079(4)   | 0.048(4)   |
| F4_32 | 0.0924(10) | 0.6078(13) | 0.7966(10)  | 0.078(6)   |
| F5_32 | 0.1175(10) | 0.5367(7)  | 0.8206(6)   | 0.068(5)   |
| F6_32 | 0.1610(12) | 0.6062(8)  | 0.8343(5)   | 0.077(6)   |
| C4_32 | 0.2223(8)  | 0.6178(6)  | 0.7740(5)   | 0.051(4)   |
| F7_32 | 0.1874(10) | 0.6580(7)  | 0.7718(7)   | 0.076(5)   |
| F8_32 | 0.2604(12) | 0.6252(11) | 0.7992(6)   | 0.064(7)   |
| F9_32 | 0.2500(15) | 0.6163(12) | 0.7437(6)   | 0.063(5)   |
| O1_33 | 0.4790(3)  | 0.6413(3)  | 0.47601(17) | 0.0287(14) |
| C1_33 | 0.5060(4)  | 0.6460(4)  | 0.4443(2)   | 0.037(2)   |
| C2_33 | 0.5208(5)  | 0.7017(4)  | 0.4366(3)   | 0.044(2)   |
| F1_33 | 0.5696(3)  | 0.7163(3)  | 0.45364(18) | 0.0413(15) |
| F2_33 | 0.5305(4)  | 0.7102(3)  | 0.40352(18) | 0.059(2)   |
| F3_33 | 0.4771(3)  | 0.7320(3)  | 0.44705(19) | 0.0483(16) |
| C3_33 | 0.4620(5)  | 0.6265(5)  | 0.4166(2)   | 0.050(3)   |
| F4_33 | 0.4370(4)  | 0.5837(3)  | 0.42662(19) | 0.061(2)   |
| F5_33 | 0.4183(3)  | 0.6600(4)  | 0.4119(2)   | 0.066(2)   |
| F6_33 | 0.4890(4)  | 0.6183(4)  | 0.38629(19) | 0.068(2)   |
| C4_33 | 0.5631(4)  | 0.6147(4)  | 0.4435(3)   | 0.039(2)   |
| F7_33 | 0.5516(3)  | 0.5657(3)  | 0.4419(2)   | 0.0548(19) |
| F8_33 | 0.5975(3)  | 0.6259(3)  | 0.4159(2)   | 0.056(2)   |
| F9_33 | 0.5957(3)  | 0.6217(3)  | 0.47166(18) | 0.0437(15) |
| O1_34 | 1.1585(7)  | 0.6006(9)  | 0.3420(6)   | 0.033(4)   |
| C1_34 | 1.1248(8)  | 0.6274(7)  | 0.3191(5)   | 0.044(4)   |
| C2_34 | 1.0952(10) | 0.5931(8)  | 0.2917(5)   | 0.064(5)   |
| F1_34 | 1.0461(11) | 0.5729(10) | 0.3048(8)   | 0.070(5)   |
| F2_34 | 1.0852(11) | 0.6170(8)  | 0.2622(5)   | 0.078(5)   |
| F3_34 | 1.1306(16) | 0.5541(9)  | 0.2846(11)  | 0.074(5)   |
| C3_34 | 1.1720(9)  | 0.6617(7)  | 0.3016(5)   | 0.050(4)   |
| F4_34 | 1.2069(13) | 0.6816(18) | 0.3255(10)  | 0.078(6)   |
| F5_34 | 1.2022(8)  | 0.6337(7)  | 0.2796(5)   | 0.062(4)   |
| F6_34 | 1.149(2)   | 0.6992(13) | 0.2833(9)   | 0.068(5)   |
| C4_34 | 1.0771(8)  | 0.6606(6)  | 0.3366(5)   | 0.056(5)   |
| F7_34 | 1.0993(9)  | 0.6993(7)  | 0.3530(6)   | 0.075(5)   |
| F8_34 | 1.0392(9)  | 0.6777(8)  | 0.3129(6)   | 0.082(5)   |
| F9_34 | 1.0453(11) | 0.6341(10) | 0.3587(6)   | 0.075(6)   |
| O1_35 | 1.1248(19) | 0.5752(18) | 0.4108(7)   | 0.037(8)   |
| C1_35 | 1.1292(10) | 0.5915(9)  | 0.4441(6)   | 0.051(6)   |
| C2_35 | 1.1808(13) | 0.6294(10) | 0.4473(8)   | 0.081(7)   |
| F1_35 | 1.2043(18) | 0.6486(11) | 0.4184(9)   | 0.098(10)  |
| F2_35 | 1.168(2)   | 0.6667(16) | 0.4687(12)  | 0.118(10)  |
| F3_35 | 1.2248(14) | 0.6023(14) | 0.4603(9)   | 0.095(7)   |
| C3_35 | 1.1376(12) | 0.5459(10) | 0.4696(6)   | 0.060(6)   |

|       |             |            |            |            |
|-------|-------------|------------|------------|------------|
| F4_35 | 1.0866(16)  | 0.5218(16) | 0.4737(15) | 0.088(7)   |
| F5_35 | 1.1766(15)  | 0.5139(12) | 0.4555(9)  | 0.080(7)   |
| F6_35 | 1.1581(15)  | 0.5596(19) | 0.5005(6)  | 0.126(14)  |
| C4_35 | 1.0712(12)  | 0.6185(10) | 0.4542(7)  | 0.073(7)   |
| F7_35 | 1.0236(15)  | 0.5926(14) | 0.4454(14) | 0.080(7)   |
| F8_35 | 1.071(3)    | 0.6241(17) | 0.4892(7)  | 0.105(8)   |
| F9_35 | 1.066(2)    | 0.6648(13) | 0.4424(12) | 0.114(9)   |
| O1_36 | 0.8828(17)  | 0.4276(17) | 0.5052(8)  | 0.031(7)   |
| C1_36 | 0.8807(10)  | 0.4010(8)  | 0.4748(6)  | 0.043(5)   |
| C2_36 | 0.8878(10)  | 0.3444(8)  | 0.4834(6)  | 0.044(5)   |
| F1_36 | 0.8493(9)   | 0.3310(8)  | 0.5082(5)  | 0.046(4)   |
| F2_36 | 0.8773(13)  | 0.3140(9)  | 0.4571(5)  | 0.058(5)   |
| F3_36 | 0.9429(9)   | 0.3360(9)  | 0.4946(7)  | 0.048(4)   |
| C3_36 | 0.9341(12)  | 0.4198(12) | 0.4529(8)  | 0.038(6)   |
| F4_36 | 0.9251(14)  | 0.4656(12) | 0.4397(11) | 0.047(6)   |
| F5_36 | 0.9816(15)  | 0.424(2)   | 0.4730(9)  | 0.033(6)   |
| F6_36 | 0.947(2)    | 0.389(2)   | 0.4271(12) | 0.051(8)   |
| C4_36 | 0.8217(10)  | 0.4106(9)  | 0.4557(6)  | 0.059(5)   |
| F7_36 | 0.8074(10)  | 0.4597(8)  | 0.4569(5)  | 0.056(5)   |
| F8_36 | 0.8248(13)  | 0.3968(11) | 0.4227(6)  | 0.071(6)   |
| F9_36 | 0.7749(11)  | 0.3866(10) | 0.4687(7)  | 0.068(7)   |
| O1_37 | 0.1033(18)  | 0.5006(19) | 0.6965(13) | 0.0375(18) |
| C1_37 | 0.0595(11)  | 0.4678(9)  | 0.7055(6)  | 0.031(5)   |
| C2_37 | 0.0005(11)  | 0.4965(10) | 0.7109(7)  | 0.049(6)   |
| F1_37 | 0.0091(17)  | 0.5387(11) | 0.7291(11) | 0.054(6)   |
| F2_37 | -0.0373(12) | 0.4694(11) | 0.7289(8)  | 0.046(5)   |
| F3_37 | -0.026(2)   | 0.510(2)   | 0.6814(9)  | 0.060(7)   |
| C3_37 | 0.0529(12)  | 0.4272(10) | 0.6769(6)  | 0.047(6)   |
| F4_37 | 0.0975(18)  | 0.3946(15) | 0.6798(10) | 0.066(7)   |
| F5_37 | 0.054(2)    | 0.4466(19) | 0.6454(8)  | 0.064(7)   |
| F6_37 | 0.0029(12)  | 0.4011(12) | 0.6811(8)  | 0.058(6)   |
| C4_37 | 0.0781(12)  | 0.4407(10) | 0.7393(6)  | 0.031(5)   |
| F7_37 | 0.1351(16)  | 0.428(3)   | 0.7387(15) | 0.043(6)   |
| F8_37 | 0.046(3)    | 0.3991(16) | 0.7450(14) | 0.044(6)   |
| F9_37 | 0.0694(16)  | 0.4693(12) | 0.7671(6)  | 0.046(6)   |
| O1_38 | 0.5419(17)  | 0.683(3)   | 0.5305(18) | 0.036(11)  |
| C1_38 | 0.5760(14)  | 0.7111(15) | 0.5519(10) | 0.046(7)   |
| C2_38 | 0.589(2)    | 0.7631(16) | 0.5357(10) | 0.065(8)   |
| F1_38 | 0.629(2)    | 0.759(2)   | 0.5104(12) | 0.070(8)   |
| F2_38 | 0.610(4)    | 0.796(3)   | 0.5583(18) | 0.081(8)   |
| F3_38 | 0.538(3)    | 0.782(3)   | 0.5226(18) | 0.067(8)   |
| C3_38 | 0.5417(19)  | 0.7183(18) | 0.5864(11) | 0.065(8)   |
| F4_38 | 0.517(3)    | 0.674(2)   | 0.5946(15) | 0.068(8)   |
| F5_38 | 0.499(2)    | 0.752(2)   | 0.5838(17) | 0.096(14)  |
| F6_38 | 0.578(3)    | 0.731(4)   | 0.6122(16) | 0.101(8)   |
| C4_38 | 0.6354(14)  | 0.6849(16) | 0.5607(11) | 0.066(8)   |
| F7_38 | 0.628(2)    | 0.6462(18) | 0.5823(15) | 0.082(14)  |
| F8_38 | 0.672(3)    | 0.717(3)   | 0.5767(19) | 0.076(8)   |
| F9_38 | 0.663(2)    | 0.668(3)   | 0.5328(15) | 0.074(8)   |
| O1_39 | 0.7799(5)   | 0.4695(7)  | 0.5337(6)  | 0.052(5)   |
| C1_39 | 0.7209(7)   | 0.4795(6)  | 0.5382(4)  | 0.032(4)   |
| C2_39 | 0.6906(7)   | 0.4358(7)  | 0.5565(4)  | 0.035(4)   |
| F1_39 | 0.7079(8)   | 0.3927(6)  | 0.5438(6)  | 0.058(4)   |
| F2_39 | 0.6309(7)   | 0.4372(7)  | 0.5539(5)  | 0.057(4)   |
| F3_39 | 0.7013(9)   | 0.4360(10) | 0.5904(4)  | 0.079(6)   |

|       |            |            |            |           |
|-------|------------|------------|------------|-----------|
| C3_39 | 0.7178(10) | 0.5311(8)  | 0.5566(6)  | 0.059(5)  |
| F4_39 | 0.7489(10) | 0.5634(10) | 0.5369(9)  | 0.082(6)  |
| F5_39 | 0.7425(12) | 0.5313(14) | 0.5879(6)  | 0.086(6)  |
| F6_39 | 0.6623(8)  | 0.5450(8)  | 0.5600(6)  | 0.066(5)  |
| C4_39 | 0.6887(8)  | 0.4893(7)  | 0.5035(5)  | 0.052(4)  |
| F7_39 | 0.7233(8)  | 0.5191(8)  | 0.4847(5)  | 0.079(5)  |
| F8_39 | 0.6364(7)  | 0.5129(7)  | 0.5085(5)  | 0.066(4)  |
| F9_39 | 0.6772(9)  | 0.4488(7)  | 0.4852(6)  | 0.063(5)  |
| O1_40 | 0.863(3)   | 0.3972(18) | 0.5705(12) | 0.052(11) |
| C1_40 | 0.8681(14) | 0.3770(11) | 0.6021(9)  | 0.046(7)  |
| C2_40 | 0.8483(17) | 0.3215(11) | 0.6030(9)  | 0.044(7)  |
| F1_40 | 0.7916(17) | 0.3191(19) | 0.5934(13) | 0.050(6)  |
| F2_40 | 0.851(3)   | 0.305(2)   | 0.6356(11) | 0.066(8)  |
| F3_40 | 0.883(2)   | 0.2929(15) | 0.5835(14) | 0.069(12) |
| C3_40 | 0.9323(14) | 0.3818(14) | 0.6161(11) | 0.076(8)  |
| F4_40 | 0.961(2)   | 0.4220(19) | 0.604(2)   | 0.108(5)  |
| F5_40 | 0.9653(18) | 0.3420(17) | 0.6101(16) | 0.069(8)  |
| F6_40 | 0.926(3)   | 0.389(2)   | 0.6503(11) | 0.099(14) |
| C4_40 | 0.8297(17) | 0.4050(14) | 0.6294(11) | 0.059(8)  |
| F7_40 | 0.850(2)   | 0.4513(13) | 0.6322(12) | 0.056(6)  |
| F8_40 | 0.835(3)   | 0.384(2)   | 0.6607(11) | 0.081(8)  |
| F9_40 | 0.7725(17) | 0.403(3)   | 0.6209(19) | 0.116(19) |
| O1_41 | 1.469(2)   | 0.6661(18) | 0.1697(8)  | 0.048(8)  |
| C1_41 | 1.4815(9)  | 0.6614(8)  | 0.1359(7)  | 0.054(5)  |
| C2_41 | 1.5133(11) | 0.7105(8)  | 0.1252(7)  | 0.068(6)  |
| F1_41 | 1.4725(13) | 0.7462(10) | 0.1228(6)  | 0.081(9)  |
| F2_41 | 1.5474(17) | 0.7065(16) | 0.0969(9)  | 0.110(10) |
| F3_41 | 1.5501(12) | 0.7266(10) | 0.1503(8)  | 0.081(7)  |
| C3_41 | 1.5210(11) | 0.6156(9)  | 0.1284(7)  | 0.068(5)  |
| F4_41 | 1.5040(12) | 0.5749(8)  | 0.1455(7)  | 0.074(5)  |
| F5_41 | 1.5761(10) | 0.6260(13) | 0.1382(7)  | 0.102(9)  |
| F6_41 | 1.521(2)   | 0.604(2)   | 0.0947(7)  | 0.067(6)  |
| C4_41 | 1.4223(10) | 0.6568(9)  | 0.1155(8)  | 0.064(6)  |
| F7_41 | 1.3967(13) | 0.6112(9)  | 0.1193(7)  | 0.087(8)  |
| F8_41 | 1.432(2)   | 0.665(2)   | 0.0819(8)  | 0.102(8)  |
| F9_41 | 1.3829(11) | 0.6893(11) | 0.1268(6)  | 0.074(5)  |
| O1_42 | 1.427(2)   | 0.5818(8)  | 0.1947(12) | 0.045(9)  |
| C1_42 | 1.3976(12) | 0.5401(9)  | 0.2053(7)  | 0.051(6)  |
| C2_42 | 1.4165(15) | 0.5275(13) | 0.2430(7)  | 0.073(7)  |
| F1_42 | 1.421(3)   | 0.5683(13) | 0.2625(8)  | 0.088(12) |
| F2_42 | 1.3776(19) | 0.4979(15) | 0.2589(9)  | 0.073(7)  |
| F3_42 | 1.4681(17) | 0.5034(18) | 0.2412(11) | 0.101(15) |
| C3_42 | 1.4179(16) | 0.4960(10) | 0.1820(8)  | 0.065(6)  |
| F4_42 | 1.393(2)   | 0.499(2)   | 0.1509(10) | 0.079(8)  |
| F5_42 | 1.4760(16) | 0.4973(15) | 0.1760(13) | 0.079(7)  |
| F6_42 | 1.404(3)   | 0.4514(11) | 0.1956(11) | 0.088(13) |
| C4_42 | 1.3298(13) | 0.5460(11) | 0.2040(9)  | 0.062(7)  |
| F7_42 | 1.3113(18) | 0.5695(18) | 0.1756(10) | 0.071(6)  |
| F8_42 | 1.304(2)   | 0.5009(13) | 0.2070(17) | 0.124(18) |
| F9_42 | 1.3096(19) | 0.5703(15) | 0.2319(10) | 0.081(11) |
| O1_43 | 0.172(3)   | 0.5892(19) | 0.6816(19) | 0.044(11) |
| C1_43 | 0.150(2)   | 0.6322(16) | 0.6675(11) | 0.067(8)  |
| C2_43 | 0.141(2)   | 0.6723(19) | 0.6961(12) | 0.072(7)  |
| F1_43 | 0.090(3)   | 0.662(3)   | 0.712(2)   | 0.082(8)  |
| F2_43 | 0.138(4)   | 0.7182(19) | 0.6824(16) | 0.09(2)   |

|       |            |            |            |           |
|-------|------------|------------|------------|-----------|
| F3_43 | 0.182(3)   | 0.674(3)   | 0.7209(13) | 0.077(18) |
| C3_43 | 0.197(3)   | 0.651(2)   | 0.6414(14) | 0.072(8)  |
| F4_43 | 0.211(4)   | 0.617(3)   | 0.6173(18) | 0.092(8)  |
| F5_43 | 0.248(3)   | 0.660(4)   | 0.659(2)   | 0.074(8)  |
| F6_43 | 0.180(5)   | 0.693(3)   | 0.626(3)   | 0.100(8)  |
| C4_43 | 0.090(2)   | 0.624(2)   | 0.6496(14) | 0.080(9)  |
| F7_43 | 0.094(3)   | 0.605(3)   | 0.6180(15) | 0.079(8)  |
| F8_43 | 0.061(3)   | 0.668(3)   | 0.648(2)   | 0.099(18) |
| F9_43 | 0.054(3)   | 0.594(3)   | 0.668(2)   | 0.094(9)  |
| O1_13 | 1.4773(17) | 0.6650(18) | 0.2357(11) | 0.038(10) |
| C1_13 | 1.5270(13) | 0.6549(11) | 0.2534(7)  | 0.065(7)  |
| C2_13 | 1.5507(15) | 0.7047(12) | 0.2697(9)  | 0.093(8)  |
| F1_13 | 1.569(2)   | 0.7327(18) | 0.2435(13) | 0.113(8)  |
| F2_13 | 1.590(2)   | 0.6937(17) | 0.2941(12) | 0.091(4)  |
| F3_13 | 1.5108(19) | 0.7330(14) | 0.2858(13) | 0.092(11) |
| C3_13 | 1.5116(17) | 0.6223(14) | 0.2853(9)  | 0.098(11) |
| F4_13 | 1.471(2)   | 0.5861(17) | 0.2841(10) | 0.101(13) |
| F5_13 | 1.494(3)   | 0.657(2)   | 0.3086(11) | 0.102(8)  |
| F6_13 | 1.561(2)   | 0.602(2)   | 0.2978(18) | 0.17(2)   |
| C4_13 | 1.5777(13) | 0.6349(14) | 0.2303(8)  | 0.082(9)  |
| F7_13 | 1.5660(19) | 0.5900(15) | 0.2177(12) | 0.077(8)  |
| F8_13 | 1.6278(13) | 0.629(2)   | 0.2486(9)  | 0.106(17) |
| F9_13 | 1.5864(19) | 0.6650(19) | 0.2023(11) | 0.096(8)  |
| O1_44 | 1.1087(18) | 0.5076(13) | 0.3544(11) | 0.037(7)  |
| C1_44 | 1.0758(11) | 0.4656(10) | 0.3588(5)  | 0.037(5)  |
| C2_44 | 1.0838(12) | 0.4291(10) | 0.3280(6)  | 0.056(6)  |
| F1_44 | 1.1358(10) | 0.4049(8)  | 0.3287(8)  | 0.061(5)  |
| F2_44 | 1.0421(17) | 0.3931(14) | 0.3266(12) | 0.065(7)  |
| F3_44 | 1.0842(10) | 0.4542(8)  | 0.2982(5)  | 0.054(5)  |
| C3_44 | 1.0106(11) | 0.4841(11) | 0.3597(7)  | 0.069(7)  |
| F4_44 | 1.0077(13) | 0.5227(11) | 0.3815(9)  | 0.088(7)  |
| F5_44 | 0.9968(13) | 0.4978(16) | 0.3275(8)  | 0.121(13) |
| F6_44 | 0.972(2)   | 0.4500(18) | 0.3697(14) | 0.065(6)  |
| C4_44 | 1.0887(11) | 0.4395(10) | 0.3935(6)  | 0.050(6)  |
| F7_44 | 1.0673(15) | 0.4640(10) | 0.4215(6)  | 0.090(9)  |
| F8_44 | 1.067(2)   | 0.3928(12) | 0.3931(9)  | 0.062(7)  |
| F9_44 | 1.1471(10) | 0.4368(14) | 0.3973(9)  | 0.096(12) |

Table S 14 Atomic coordinates and  $U_{eq}$  [ $\text{\AA}^2$ ] for **8**

| Atom | x           | y           | z           | $U_{eq}$    |
|------|-------------|-------------|-------------|-------------|
| Fe1  | 0.30894(2)  | 0.54158(2)  | 0.90033(3)  | 0.01789(10) |
| N1   | 0.17548(16) | 0.49320(16) | 0.85168(16) | 0.0233(6)   |
| C1   | 0.22631(18) | 0.51224(16) | 0.87017(16) | 0.0192(6)   |
| Al1  | 0.50277(5)  | 0.23865(5)  | 0.12331(5)  | 0.01865(19) |
| C2   | 0.11014(19) | 0.4684(2)   | 0.8300(2)   | 0.0266(8)   |
| Al2  | 0.41778(5)  | 0.24841(5)  | 0.65875(5)  | 0.01705(19) |
| C3   | 0.0583(2)   | 0.5048(2)   | 0.8698(2)   | 0.0328(8)   |
| H3A  | 0.065677    | 0.553427    | 0.867202    | 0.049       |
| H3B  | 0.062026    | 0.490249    | 0.913874    | 0.049       |
| H3C  | 0.013736    | 0.494149    | 0.853945    | 0.049       |
| C4   | 0.1023(2)   | 0.4877(3)   | 0.7600(2)   | 0.0406(10)  |
| H4A  | 0.139464    | 0.469034    | 0.735680    | 0.061       |
| H4B  | 0.102180    | 0.536766    | 0.755919    | 0.061       |

|       |             |             |              |            |
|-------|-------------|-------------|--------------|------------|
| H4C   | 0.060393    | 0.469535    | 0.743765     | 0.061      |
| C5    | 0.1088(2)   | 0.3934(2)   | 0.8405(3)    | 0.0446(12) |
| H5A   | 0.065218    | 0.375696    | 0.828191     | 0.067      |
| H5B   | 0.116811    | 0.383784    | 0.885194     | 0.067      |
| H5C   | 0.143414    | 0.372113    | 0.814830     | 0.067      |
| O1_13 | 0.5721(12)  | 0.2820(13)  | 0.0962(9)    | 0.030(2)   |
| C1_13 | 0.6059(5)   | 0.3071(5)   | 0.0465(5)    | 0.0228(19) |
| C2_13 | 0.5601(4)   | 0.3441(4)   | 0.0003(4)    | 0.0375(18) |
| F1_13 | 0.5396(3)   | 0.4020(2)   | 0.0244(3)    | 0.0561(16) |
| F2_13 | 0.5867(8)   | 0.3552(7)   | -0.0566(5)   | 0.045(2)   |
| F3_13 | 0.5059(3)   | 0.3054(3)   | -0.0111(3)   | 0.0472(14) |
| C3_13 | 0.6448(5)   | 0.2503(6)   | 0.0116(5)    | 0.043(3)   |
| F4_13 | 0.6710(3)   | 0.2071(3)   | 0.0521(3)    | 0.0595(18) |
| F5_13 | 0.6037(3)   | 0.2179(3)   | -0.0270(3)   | 0.0552(15) |
| F6_13 | 0.6937(5)   | 0.2762(7)   | -0.0236(5)   | 0.073(3)   |
| C4_13 | 0.6581(4)   | 0.3575(5)   | 0.0748(5)    | 0.0387(18) |
| F7_13 | 0.7061(2)   | 0.3255(3)   | 0.1036(3)    | 0.0498(14) |
| F8_13 | 0.6810(8)   | 0.3978(8)   | 0.0291(7)    | 0.073(4)   |
| F9_13 | 0.6271(4)   | 0.3979(3)   | 0.1165(3)    | 0.0514(14) |
| O1_12 | 0.48123(17) | 0.17574(16) | 0.07179(15)  | 0.0346(6)  |
| C1_12 | 0.4341(2)   | 0.1326(2)   | 0.05121(19)  | 0.0317(8)  |
| C2_12 | 0.4106(3)   | 0.0855(3)   | 0.1041(3)    | 0.0540(14) |
| F1_12 | 0.4579(2)   | 0.03886(17) | 0.11654(18)  | 0.0669(11) |
| F2_12 | 0.3537(2)   | 0.0539(2)   | 0.0908(2)    | 0.0746(12) |
| F3_12 | 0.40056(19) | 0.12061(18) | 0.15747(15)  | 0.0566(8)  |
| C3_12 | 0.3726(3)   | 0.1724(3)   | 0.0245(2)    | 0.0445(11) |
| F4_12 | 0.39228(17) | 0.22429(18) | -0.00916(17) | 0.0542(8)  |
| F5_12 | 0.33516(16) | 0.1947(2)   | 0.07215(18)  | 0.0598(9)  |
| F6_12 | 0.33426(18) | 0.1343(2)   | -0.01174(17) | 0.0572(8)  |
| C4_12 | 0.4652(3)   | 0.0909(3)   | -0.0035(2)   | 0.0469(11) |
| F7_12 | 0.4725(2)   | 0.12869(19) | -0.05493(14) | 0.0558(8)  |
| F8_12 | 0.4284(2)   | 0.03718(18) | -0.01843(19) | 0.0670(10) |
| F9_12 | 0.5249(2)   | 0.06949(19) | 0.01265(18)  | 0.0600(9)  |
| O1_3  | 0.52579(14) | 0.20855(15) | 0.19647(14)  | 0.0299(6)  |
| C1_3  | 0.57314(19) | 0.18197(19) | 0.23377(19)  | 0.0277(7)  |
| C2_3  | 0.6357(2)   | 0.2276(2)   | 0.2384(2)    | 0.0346(9)  |
| F1_3  | 0.67455(13) | 0.22008(17) | 0.18835(14)  | 0.0447(7)  |
| F2_3  | 0.67275(16) | 0.21407(18) | 0.28918(16)  | 0.0512(8)  |
| F3_3  | 0.61865(14) | 0.29187(13) | 0.24126(14)  | 0.0399(6)  |
| C3_3  | 0.5423(3)   | 0.1740(3)   | 0.3011(2)    | 0.0445(11) |
| F4_3  | 0.47999(16) | 0.15312(18) | 0.29769(15)  | 0.0506(7)  |
| F5_3  | 0.54223(19) | 0.23330(19) | 0.33050(15)  | 0.0556(8)  |
| F6_3  | 0.5759(2)   | 0.1319(2)   | 0.33767(18)  | 0.0677(11) |
| C4_3  | 0.5941(3)   | 0.1111(2)   | 0.2099(3)    | 0.0478(12) |
| F7_3  | 0.5461(2)   | 0.06648(15) | 0.2221(2)    | 0.0620(10) |
| F8_3  | 0.64955(19) | 0.08932(18) | 0.2361(2)    | 0.0711(12) |
| F9_3  | 0.60321(19) | 0.11343(18) | 0.14719(18)  | 0.0601(9)  |
| O1_4  | 0.43386(15) | 0.29000(15) | 0.13143(15)  | 0.0315(6)  |
| C1_4  | 0.39989(18) | 0.33575(19) | 0.16441(19)  | 0.0267(7)  |
| C2_4  | 0.3467(2)   | 0.3690(3)   | 0.1219(3)    | 0.0471(11) |
| F1_4  | 0.29554(16) | 0.3292(2)   | 0.1130(2)    | 0.0676(11) |
| F2_4  | 0.3240(2)   | 0.42671(19) | 0.1456(2)    | 0.0692(11) |
| F3_4  | 0.3725(2)   | 0.3831(2)   | 0.06551(17)  | 0.0653(10) |
| C3_4  | 0.4473(2)   | 0.3914(2)   | 0.1908(2)    | 0.0380(9)  |
| F4_4  | 0.50313(15) | 0.36278(17) | 0.21250(18)  | 0.0512(8)  |

|      |             |             |             |            |
|------|-------------|-------------|-------------|------------|
| F5_4 | 0.46512(18) | 0.43339(15) | 0.14527(18) | 0.0542(8)  |
| F6_4 | 0.42160(17) | 0.42756(16) | 0.23655(17) | 0.0536(8)  |
| C4_4 | 0.3644(2)   | 0.3016(2)   | 0.2221(3)   | 0.0427(11) |
| F7_4 | 0.40798(19) | 0.28799(19) | 0.26771(15) | 0.0570(8)  |
| F8_4 | 0.31748(17) | 0.3396(2)   | 0.24707(18) | 0.0600(9)  |
| F9_4 | 0.3362(2)   | 0.24462(17) | 0.2040(2)   | 0.0618(9)  |
| O1_5 | 0.46102(13) | 0.20480(13) | 0.60109(13) | 0.0235(5)  |
| C1_5 | 0.45890(19) | 0.17919(19) | 0.54223(18) | 0.0260(7)  |
| C2_5 | 0.4444(2)   | 0.2352(2)   | 0.4926(2)   | 0.0345(9)  |
| F1_5 | 0.38043(15) | 0.25123(14) | 0.49126(12) | 0.0382(6)  |
| F2_5 | 0.46144(19) | 0.21650(16) | 0.43421(13) | 0.0513(8)  |
| F3_5 | 0.47884(16) | 0.29043(13) | 0.50701(14) | 0.0427(6)  |
| C3_5 | 0.5271(2)   | 0.1453(2)   | 0.5277(2)   | 0.0327(9)  |
| F4_5 | 0.54834(13) | 0.11027(14) | 0.57660(14) | 0.0394(6)  |
| F5_5 | 0.57318(14) | 0.19184(15) | 0.51516(16) | 0.0459(7)  |
| F6_5 | 0.52354(15) | 0.10419(15) | 0.47786(15) | 0.0448(7)  |
| C4_5 | 0.4031(2)   | 0.1250(2)   | 0.53777(19) | 0.0286(8)  |
| F7_5 | 0.42156(14) | 0.06871(13) | 0.56659(13) | 0.0370(6)  |
| F8_5 | 0.38769(14) | 0.10901(14) | 0.47793(12) | 0.0379(6)  |
| F9_5 | 0.34821(12) | 0.14674(14) | 0.56547(13) | 0.0350(5)  |
| O1_6 | 0.3613(7)   | 0.2001(6)   | 0.7015(6)   | 0.0210(19) |
| C1_6 | 0.3525(3)   | 0.1537(4)   | 0.7472(3)   | 0.0218(14) |
| C2_6 | 0.3163(3)   | 0.1863(3)   | 0.8053(2)   | 0.0289(11) |
| F1_6 | 0.2530(4)   | 0.1972(3)   | 0.7926(3)   | 0.0367(14) |
| F2_6 | 0.3200(3)   | 0.1481(2)   | 0.85667(17) | 0.0409(10) |
| F3_6 | 0.3431(5)   | 0.2452(4)   | 0.8177(7)   | 0.041(2)   |
| C3_6 | 0.4193(3)   | 0.1227(3)   | 0.7703(3)   | 0.0384(14) |
| F4_6 | 0.4595(4)   | 0.1109(6)   | 0.7221(6)   | 0.047(2)   |
| F5_6 | 0.4506(3)   | 0.1638(4)   | 0.8093(4)   | 0.0503(18) |
| F6_6 | 0.4107(5)   | 0.0640(5)   | 0.8000(4)   | 0.047(2)   |
| C4_6 | 0.3077(3)   | 0.0969(2)   | 0.7203(2)   | 0.0269(11) |
| F7_6 | 0.3425(3)   | 0.0571(2)   | 0.6818(2)   | 0.0419(11) |
| F8_6 | 0.2818(5)   | 0.0580(3)   | 0.7648(3)   | 0.0374(14) |
| F9_6 | 0.2580(5)   | 0.1223(6)   | 0.6866(3)   | 0.0324(17) |
| O1_7 | 0.47696(12) | 0.28046(13) | 0.70978(12) | 0.0223(5)  |
| C1_7 | 0.53709(16) | 0.31006(18) | 0.71501(17) | 0.0216(7)  |
| C2_7 | 0.55576(19) | 0.31280(19) | 0.78607(19) | 0.0271(7)  |
| F1_7 | 0.57771(14) | 0.25341(13) | 0.80620(14) | 0.0388(6)  |
| F2_7 | 0.60322(13) | 0.35784(14) | 0.79849(14) | 0.0388(6)  |
| F3_7 | 0.50329(13) | 0.32843(14) | 0.82053(12) | 0.0357(6)  |
| C3_7 | 0.5339(2)   | 0.3835(2)   | 0.6887(2)   | 0.0292(8)  |
| F4_7 | 0.50375(13) | 0.38386(14) | 0.63225(13) | 0.0390(6)  |
| F5_7 | 0.49891(13) | 0.42252(12) | 0.72690(15) | 0.0375(6)  |
| F6_7 | 0.59341(13) | 0.41115(14) | 0.68115(15) | 0.0415(6)  |
| C4_7 | 0.59204(19) | 0.2704(2)   | 0.6789(2)   | 0.0313(8)  |
| F7_7 | 0.58953(13) | 0.28309(15) | 0.61662(13) | 0.0403(6)  |
| F8_7 | 0.65252(12) | 0.28701(15) | 0.69807(16) | 0.0460(8)  |
| F9_7 | 0.58402(12) | 0.20491(13) | 0.68668(15) | 0.0390(6)  |
| O1_8 | 0.37037(12) | 0.30909(12) | 0.62131(12) | 0.0210(5)  |
| C1_8 | 0.31654(18) | 0.34970(17) | 0.62492(18) | 0.0237(7)  |
| C2_8 | 0.2570(2)   | 0.3172(2)   | 0.5879(2)   | 0.0322(8)  |
| F1_8 | 0.26580(15) | 0.32168(16) | 0.52630(14) | 0.0442(6)  |
| F2_8 | 0.19930(13) | 0.34694(16) | 0.60297(16) | 0.0456(7)  |
| F3_8 | 0.25195(13) | 0.25240(13) | 0.60215(13) | 0.0365(6)  |
| C3_8 | 0.29458(19) | 0.36241(19) | 0.6941(2)   | 0.0280(7)  |



|       |             |             |             |            |
|-------|-------------|-------------|-------------|------------|
| F4_8  | 0.34780(12) | 0.36862(13) | 0.73140(12) | 0.0322(5)  |
| F5_8  | 0.25870(12) | 0.31206(12) | 0.71694(12) | 0.0327(5)  |
| F6_8  | 0.25873(14) | 0.41869(13) | 0.70099(15) | 0.0414(6)  |
| C4_8  | 0.3352(2)   | 0.4182(2)   | 0.5935(2)   | 0.0318(8)  |
| F7_8  | 0.37327(14) | 0.45395(12) | 0.63273(14) | 0.0390(6)  |
| F8_8  | 0.28191(16) | 0.45491(15) | 0.57947(19) | 0.0523(8)  |
| F9_8  | 0.36988(16) | 0.40842(14) | 0.54104(13) | 0.0408(6)  |
| C1_9  | 0.3468(3)   | 0.4767(3)   | 0.3918(3)   | 0.0491(12) |
| C2_9  | 0.3350(3)   | 0.4100(3)   | 0.3904(2)   | 0.0480(11) |
| C3_9  | 0.2723(3)   | 0.3849(3)   | 0.3958(3)   | 0.0516(12) |
| H3_9  | 0.264461    | 0.337789    | 0.394272    | 0.062      |
| C4_9  | 0.2203(3)   | 0.4298(3)   | 0.4037(3)   | 0.0566(13) |
| H4_9  | 0.176005    | 0.413554    | 0.407167    | 0.068      |
| C5_9  | 0.2325(3)   | 0.4976(3)   | 0.4064(3)   | 0.0517(12) |
| H5_9  | 0.197062    | 0.528171    | 0.413718    | 0.062      |
| C6_9  | 0.2969(3)   | 0.5213(3)   | 0.3985(3)   | 0.0497(12) |
| H6_9  | 0.305574    | 0.568274    | 0.397815    | 0.060      |
| F1_9  | 0.41083(19) | 0.4972(2)   | 0.3857(3)   | 0.0833(14) |
| F2_9  | 0.3870(2)   | 0.3665(2)   | 0.3836(2)   | 0.0746(12) |
| O1_10 | 0.370(2)    | 0.201(2)    | 0.7048(19)  | 0.023(7)   |
| C1_10 | 0.3609(8)   | 0.1540(10)  | 0.7498(9)   | 0.020(4)   |
| C2_10 | 0.2865(7)   | 0.1319(8)   | 0.7510(7)   | 0.030(3)   |
| F1_10 | 0.2649(18)  | 0.1240(18)  | 0.6926(10)  | 0.040(7)   |
| F2_10 | 0.2775(14)  | 0.0749(9)   | 0.7816(10)  | 0.041(5)   |
| F3_10 | 0.2495(10)  | 0.1785(11)  | 0.7793(12)  | 0.039(4)   |
| C3_10 | 0.3798(7)   | 0.1852(7)   | 0.8152(6)   | 0.025(3)   |
| F4_10 | 0.4459(8)   | 0.1866(8)   | 0.8192(10)  | 0.026(3)   |
| F5_10 | 0.3586(16)  | 0.2476(11)  | 0.821(2)    | 0.030(5)   |
| F6_10 | 0.3564(8)   | 0.1475(7)   | 0.8615(6)   | 0.037(3)   |
| C4_10 | 0.4053(8)   | 0.0916(7)   | 0.7347(7)   | 0.029(3)   |
| F7_10 | 0.4630(14)  | 0.114(2)    | 0.713(2)    | 0.050(8)   |
| F8_10 | 0.416(2)    | 0.0544(18)  | 0.7849(13)  | 0.054(9)   |
| F9_10 | 0.3763(10)  | 0.0543(7)   | 0.6903(7)   | 0.039(3)   |
| O1_11 | 0.568(2)    | 0.279(2)    | 0.0896(16)  | 0.030(2)   |
| C1_11 | 0.5997(9)   | 0.3053(8)   | 0.0390(9)   | 0.030(4)   |
| C2_11 | 0.5490(8)   | 0.3208(9)   | -0.0141(8)  | 0.054(4)   |
| F1_11 | 0.5323(6)   | 0.2655(6)   | -0.0443(4)  | 0.071(3)   |
| F2_11 | 0.5759(16)  | 0.3646(15)  | -0.0545(13) | 0.073(8)   |
| F3_11 | 0.4948(4)   | 0.3485(8)   | 0.0108(5)   | 0.069(4)   |
| C3_11 | 0.6336(8)   | 0.3716(8)   | 0.0598(7)   | 0.055(4)   |
| F4_11 | 0.6643(7)   | 0.3634(8)   | 0.1151(5)   | 0.075(5)   |
| F5_11 | 0.5876(7)   | 0.4202(5)   | 0.0628(7)   | 0.081(4)   |
| F6_11 | 0.6851(8)   | 0.3900(14)  | 0.0222(11)  | 0.063(7)   |
| C4_11 | 0.6516(9)   | 0.2535(9)   | 0.0140(9)   | 0.057(5)   |
| F7_11 | 0.7030(5)   | 0.2537(8)   | 0.0532(6)   | 0.085(4)   |
| F8_11 | 0.6716(11)  | 0.2688(9)   | -0.0444(7)  | 0.079(5)   |
| F9_11 | 0.6236(7)   | 0.1931(5)   | 0.0101(8)   | 0.081(5)   |
| C1_1  | 0.3078(2)   | 0.43881(19) | 0.93060(19) | 0.0257(7)  |
| C2_1  | 0.3745(2)   | 0.46108(19) | 0.92826(19) | 0.0270(8)  |
| C3_1  | 0.3816(2)   | 0.5145(2)   | 0.97312(18) | 0.0284(8)  |
| C4_1  | 0.31783(19) | 0.5276(2)   | 1.00111(18) | 0.0257(7)  |
| C5_1  | 0.27279(19) | 0.47968(19) | 0.97721(18) | 0.0231(7)  |
| C6_1  | 0.2836(2)   | 0.37544(19) | 0.9006(2)   | 0.0351(9)  |
| H6A_1 | 0.235009    | 0.373357    | 0.903598    | 0.053      |
| H6B_1 | 0.302975    | 0.336668    | 0.922377    | 0.053      |

|        |           |             |             |            |
|--------|-----------|-------------|-------------|------------|
| H6C_1  | 0.296806  | 0.374716    | 0.856050    | 0.053      |
| C9_1   | 0.3043(2) | 0.5743(2)   | 1.0549(2)   | 0.0352(9)  |
| H9A_1  | 0.335317  | 0.612239    | 1.053136    | 0.053      |
| H9B_1  | 0.310139  | 0.550208    | 1.094906    | 0.053      |
| H9C_1  | 0.258610  | 0.591026    | 1.051966    | 0.053      |
| C8_1   | 0.4457(2) | 0.5411(3)   | 1.0004(2)   | 0.0401(10) |
| H8A_1  | 0.482147  | 0.532429    | 0.970775    | 0.060      |
| H8B_1  | 0.454909  | 0.518567    | 1.040568    | 0.060      |
| H8C_1  | 0.441658  | 0.589636    | 1.007439    | 0.060      |
| C7_1   | 0.4287(2) | 0.4278(2)   | 0.8920(2)   | 0.0371(10) |
| H7A_1  | 0.413574  | 0.419023    | 0.848771    | 0.056      |
| H7B_1  | 0.440430  | 0.385183    | 0.912405    | 0.056      |
| H7C_1  | 0.467733  | 0.457212    | 0.890914    | 0.056      |
| C10_1  | 0.2053(2) | 0.4652(2)   | 1.0038(2)   | 0.0306(8)  |
| H10A_1 | 0.186278  | 0.506624    | 1.021131    | 0.046      |
| H10B_1 | 0.209157  | 0.431538    | 1.037435    | 0.046      |
| H10C_1 | 0.176395  | 0.447911    | 0.970317    | 0.046      |
| C1_2   | 0.2761(2) | 0.63709(19) | 0.86438(18) | 0.0260(7)  |
| C2_2   | 0.3359(2) | 0.64722(19) | 0.8976(2)   | 0.0291(7)  |
| C3_2   | 0.3877(2) | 0.6089(2)   | 0.8665(2)   | 0.0308(8)  |
| C4_2   | 0.3585(2) | 0.57459(19) | 0.81548(19) | 0.0272(8)  |
| C5_2   | 0.2927(2) | 0.59401(18) | 0.81104(18) | 0.0256(7)  |
| C6_2   | 0.2129(2) | 0.6744(2)   | 0.8750(3)   | 0.0391(10) |
| H6A_2  | 0.212215  | 0.714686    | 0.848365    | 0.059      |
| H6B_2  | 0.209821  | 0.687594    | 0.919483    | 0.059      |
| H6C_2  | 0.175207  | 0.645468    | 0.864132    | 0.059      |
| C7_2   | 0.3475(2) | 0.6972(2)   | 0.9497(2)   | 0.0371(9)  |
| H7A_2  | 0.385798  | 0.683080    | 0.974969    | 0.056      |
| H7B_2  | 0.307996  | 0.699667    | 0.976611    | 0.056      |
| H7C_2  | 0.356313  | 0.741584    | 0.931300    | 0.056      |
| C11_2  | 0.2491(3) | 0.5856(3)   | 0.7538(2)   | 0.0384(10) |
| H11A_2 | 0.265259  | 0.614635    | 0.719703    | 0.058      |
| H11B_2 | 0.203300  | 0.598021    | 0.764435    | 0.058      |
| H11C_2 | 0.250271  | 0.538585    | 0.739878    | 0.058      |
| C9_2   | 0.3938(2) | 0.5328(2)   | 0.7665(2)   | 0.0354(9)  |
| H9A_2  | 0.398410  | 0.558867    | 0.727487    | 0.053      |
| H9B_2  | 0.367979  | 0.491994    | 0.757992    | 0.053      |
| H9C_2  | 0.437912  | 0.520349    | 0.782196    | 0.053      |
| C8_2   | 0.4612(2) | 0.6165(2)   | 0.8745(2)   | 0.0373(9)  |
| H8A_2  | 0.482500  | 0.572331    | 0.870810    | 0.056      |
| H8B_2  | 0.470611  | 0.635463    | 0.916284    | 0.056      |
| H8C_2  | 0.478555  | 0.646535    | 0.841818    | 0.056      |

Table S 15 Atomic coordinates and  $U_{eq}$  [ $\text{\AA}^2$ ] for S1

| Atom | x            | y           | z           | $U_{eq}$    |
|------|--------------|-------------|-------------|-------------|
| Al1  | 0.24066(5)   | 0.57875(3)  | 0.77546(3)  | 0.01127(11) |
| N1   | 0.78940(16)  | 0.73189(8)  | 0.54999(8)  | 0.0173(3)   |
| O1_1 | 0.17863(13)  | 0.58373(7)  | 0.84690(6)  | 0.0167(3)   |
| C1_1 | 0.07063(19)  | 0.58535(10) | 0.87294(10) | 0.0191(4)   |
| C2_1 | -0.0052(2)   | 0.52274(11) | 0.86082(11) | 0.0260(5)   |
| F1_1 | -0.07683(12) | 0.52105(7)  | 0.80025(6)  | 0.0312(3)   |

|       |              |             |             |            |
|-------|--------------|-------------|-------------|------------|
| F2_1  | -0.08400(12) | 0.51392(7)  | 0.90342(7)  | 0.0332(3)  |
| F3_1  | 0.07406(13)  | 0.47442(6)  | 0.86549(8)  | 0.0390(4)  |
| C3_1  | 0.1116(2)    | 0.59671(12) | 0.94818(11) | 0.0297(5)  |
| F4_1  | 0.20105(14)  | 0.64072(8)  | 0.96106(7)  | 0.0435(4)  |
| F5_1  | 0.16125(14)  | 0.54472(8)  | 0.97840(7)  | 0.0430(4)  |
| F6_1  | 0.01358(13)  | 0.61369(8)  | 0.97663(7)  | 0.0393(4)  |
| C4_1  | -0.0183(2)   | 0.64007(11) | 0.84254(11) | 0.0266(5)  |
| F7_1  | 0.02545(14)  | 0.69558(6)  | 0.86837(8)  | 0.0382(3)  |
| F8_1  | -0.13853(12) | 0.63417(7)  | 0.85243(7)  | 0.0323(3)  |
| F9_1  | -0.02108(13) | 0.64452(7)  | 0.77838(7)  | 0.0330(3)  |
| O1_2  | 0.26916(12)  | 0.65151(6)  | 0.74341(7)  | 0.0155(3)  |
| C1_2  | 0.34598(19)  | 0.70239(9)  | 0.74849(10) | 0.0173(4)  |
| C2_2  | 0.3179(2)    | 0.74620(10) | 0.80436(12) | 0.0301(5)  |
| F1_2  | 0.20404(15)  | 0.77404(7)  | 0.78673(8)  | 0.0431(4)  |
| F2_2  | 0.40654(17)  | 0.79082(7)  | 0.82037(8)  | 0.0460(4)  |
| F3_2  | 0.31349(16)  | 0.71322(7)  | 0.85866(7)  | 0.0380(3)  |
| C3_2  | 0.4906(2)    | 0.68389(10) | 0.76286(12) | 0.0263(5)  |
| F4_2  | 0.51257(12)  | 0.63674(6)  | 0.72452(7)  | 0.0326(3)  |
| F5_2  | 0.52644(13)  | 0.66593(6)  | 0.82547(7)  | 0.0359(3)  |
| F6_2  | 0.56672(13)  | 0.73115(7)  | 0.75235(9)  | 0.0449(4)  |
| C4_2  | 0.3163(2)    | 0.73851(10) | 0.68174(11) | 0.0233(4)  |
| F7_2  | 0.36866(13)  | 0.71032(7)  | 0.63597(6)  | 0.0329(3)  |
| F8_2  | 0.36011(13)  | 0.79744(6)  | 0.68701(7)  | 0.0338(3)  |
| F9_2  | 0.19030(12)  | 0.74122(7)  | 0.65921(7)  | 0.0333(3)  |
| O1_3  | 0.38510(13)  | 0.53971(6)  | 0.79293(7)  | 0.0185(3)  |
| C1_3  | 0.45523(19)  | 0.49356(9)  | 0.82703(10) | 0.0210(4)  |
| C2_3  | 0.5943(2)    | 0.49855(11) | 0.81340(14) | 0.0336(6)  |
| F1_3  | 0.65396(13)  | 0.54740(7)  | 0.84548(10) | 0.0484(4)  |
| F2_3  | 0.66394(13)  | 0.44711(6)  | 0.83333(9)  | 0.0409(4)  |
| F3_3  | 0.59415(14)  | 0.50660(7)  | 0.74978(9)  | 0.0426(4)  |
| C3_3  | 0.3981(2)    | 0.42831(10) | 0.80376(11) | 0.0244(4)  |
| F4_3  | 0.27143(12)  | 0.42872(6)  | 0.79720(7)  | 0.0273(3)  |
| F5_3  | 0.42636(13)  | 0.41281(6)  | 0.74553(7)  | 0.0320(3)  |
| F6_3  | 0.44305(13)  | 0.38240(6)  | 0.84616(7)  | 0.0331(3)  |
| C4_3  | 0.4584(2)    | 0.50027(11) | 0.90228(11) | 0.0299(5)  |
| F7_3  | 0.35094(14)  | 0.47786(7)  | 0.91862(7)  | 0.0350(3)  |
| F8_3  | 0.55708(15)  | 0.46902(7)  | 0.93839(7)  | 0.0444(4)  |
| F9_3  | 0.46915(15)  | 0.55994(7)  | 0.92036(7)  | 0.0386(3)  |
| O1_4  | 0.12877(13)  | 0.54181(6)  | 0.71641(7)  | 0.0181(3)  |
| C1_4  | 0.0872(2)    | 0.52560(10) | 0.65292(10) | 0.0205(4)  |
| C2_4  | 0.1790(2)    | 0.54885(13) | 0.60767(11) | 0.0368(6)  |
| F1_4  | 0.16546(16)  | 0.60954(8)  | 0.59574(7)  | 0.0504(4)  |
| F2_4  | 0.15864(17)  | 0.51894(11) | 0.54974(7)  | 0.0616(5)  |
| F3_4  | 0.30129(14)  | 0.53918(9)  | 0.63630(7)  | 0.0454(4)  |
| C3_4  | 0.0771(2)    | 0.45285(11) | 0.64820(12) | 0.0302(5)  |
| F4_4  | 0.03270(13)  | 0.42949(6)  | 0.69854(7)  | 0.0355(3)  |
| F5_4  | 0.19170(14)  | 0.42688(7)  | 0.64839(8)  | 0.0443(4)  |
| F6_4  | -0.00133(15) | 0.43432(7)  | 0.59245(8)  | 0.0457(4)  |
| C4_4  | -0.0490(2)   | 0.55403(10) | 0.62904(10) | 0.0247(5)  |
| F7_4  | -0.13578(12) | 0.52476(7)  | 0.65666(7)  | 0.0306(3)  |
| F8_4  | -0.08819(14) | 0.55045(7)  | 0.56354(6)  | 0.0361(3)  |
| F9_4  | -0.05067(14) | 0.61433(6)  | 0.64507(7)  | 0.0367(3)  |
| C1_5  | 0.69105(19)  | 0.68931(9)  | 0.52445(10) | 0.0177(4)  |
| Br1_5 | 0.36682(2)   | 0.54783(2)  | 0.44513(2)  | 0.03149(7) |
| C2_5  | 0.6605(2)    | 0.67704(10) | 0.45660(10) | 0.0224(4)  |

|       |             |             |             |            |
|-------|-------------|-------------|-------------|------------|
| H2_5  | 0.705458    | 0.697844    | 0.427111    | 0.027      |
| C3_5  | 0.5647(2)   | 0.63453(11) | 0.43294(10) | 0.0242(5)  |
| H3_5  | 0.544022    | 0.625358    | 0.387120    | 0.029      |
| C4_5  | 0.4988(2)   | 0.60522(10) | 0.47681(11) | 0.0222(4)  |
| C5_5  | 0.5273(2)   | 0.61739(10) | 0.54395(11) | 0.0225(4)  |
| H5_5  | 0.480970    | 0.596941    | 0.573075    | 0.027      |
| C6_5  | 0.6235(2)   | 0.65951(10) | 0.56802(10) | 0.0203(4)  |
| H6_5  | 0.643957    | 0.668282    | 0.613933    | 0.024      |
| C1_6  | 0.77991(19) | 0.76494(9)  | 0.60885(10) | 0.0166(4)  |
| Br1_6 | 0.75254(2)  | 0.86650(2)  | 0.80282(2)  | 0.03014(6) |
| C2_6  | 0.66858(19) | 0.79878(9)  | 0.61260(10) | 0.0186(4)  |
| H2_6  | 0.599253    | 0.800315    | 0.575972    | 0.022      |
| C3_6  | 0.6607(2)   | 0.83000(9)  | 0.67040(11) | 0.0203(4)  |
| H3_6  | 0.587155    | 0.854450    | 0.673642    | 0.024      |
| C4_6  | 0.7622(2)   | 0.82504(9)  | 0.72368(10) | 0.0187(4)  |
| C5_6  | 0.87210(19) | 0.79095(10) | 0.72043(10) | 0.0197(4)  |
| H5_6  | 0.939751    | 0.788042    | 0.757746    | 0.024      |
| C6_6  | 0.88199(19) | 0.76123(9)  | 0.66222(10) | 0.0188(4)  |
| H6_6  | 0.957543    | 0.738508    | 0.658590    | 0.023      |
| C1_7  | 0.90104(19) | 0.73958(10) | 0.52358(9)  | 0.0173(4)  |
| Br1_7 | 1.29272(2)  | 0.76267(2)  | 0.45726(2)  | 0.03286(7) |
| C2_7  | 0.9543(2)   | 0.68893(10) | 0.49459(10) | 0.0201(4)  |
| H2_7  | 0.911037    | 0.649723    | 0.489126    | 0.024      |
| C3_7  | 1.0700(2)   | 0.69670(10) | 0.47413(10) | 0.0224(4)  |
| H3_7  | 1.107478    | 0.662720    | 0.454753    | 0.027      |
| C4_7  | 1.1315(2)   | 0.75444(10) | 0.48199(10) | 0.0212(4)  |
| C5_7  | 1.0776(2)   | 0.80561(10) | 0.50828(10) | 0.0214(4)  |
| H5_7  | 1.119483    | 0.845184    | 0.511657    | 0.026      |
| C6_7  | 0.96264(19) | 0.79815(10) | 0.52939(10) | 0.0189(4)  |
| H6_7  | 0.924971    | 0.832612    | 0.547886    | 0.023      |

Table S 16 Atomic coordinates and  $U_{eq}$  [ $\text{\AA}^2$ ] for S2

| Atom | x            | y           | z           | $U_{eq}$   |
|------|--------------|-------------|-------------|------------|
| Al1  | 0.06641(18)  | 0.44463(11) | 0.32194(10) | 0.0150(3)  |
| Al2  | -0.01161(18) | 0.90039(11) | 0.67600(10) | 0.0145(3)  |
| N1   | 0.7873(5)    | 0.3556(3)   | 0.7898(3)   | 0.0158(10) |
| N2   | 0.2774(5)    | -0.0130(3)  | 0.2079(3)   | 0.0167(10) |
| O1_1 | 0.1448(4)    | 0.4620(3)   | 0.4335(2)   | 0.0210(8)  |
| C1_1 | 0.2406(6)    | 0.4465(4)   | 0.4987(4)   | 0.0191(12) |
| C2_1 | 0.3590(7)    | 0.4274(5)   | 0.4631(4)   | 0.0309(14) |
| F1_1 | 0.3149(5)    | 0.3341(3)   | 0.4260(3)   | 0.0439(11) |
| F2_1 | 0.4703(4)    | 0.4378(3)   | 0.5266(3)   | 0.0336(9)  |
| F3_1 | 0.3937(5)    | 0.4807(4)   | 0.4020(3)   | 0.0523(13) |
| C3_1 | 0.3050(7)    | 0.5387(4)   | 0.5695(4)   | 0.0298(14) |
| F4_1 | 0.2092(5)    | 0.5719(3)   | 0.5846(3)   | 0.0403(10) |
| F5_1 | 0.3962(5)    | 0.6080(3)   | 0.5385(3)   | 0.0435(11) |
| F6_1 | 0.3733(4)    | 0.5229(3)   | 0.6460(2)   | 0.0353(9)  |
| C4_1 | 0.1673(7)    | 0.3602(4)   | 0.5446(4)   | 0.0301(14) |
| F7_1 | 0.0900(5)    | 0.3843(3)   | 0.5960(3)   | 0.0405(10) |
| F8_1 | 0.2559(4)    | 0.3283(3)   | 0.5979(3)   | 0.0346(9)  |
| F9_1 | 0.0787(5)    | 0.2871(3)   | 0.4864(3)   | 0.0454(11) |
| O1_2 | -0.0881(4)   | 0.4651(3)   | 0.3127(2)   | 0.0201(8)  |
| C1_2 | -0.2010(6)   | 0.4604(4)   | 0.3443(4)   | 0.0173(11) |

|      |             |           |           |            |
|------|-------------|-----------|-----------|------------|
| C2_2 | -0.2854(6)  | 0.5110(4) | 0.2832(4) | 0.0243(12) |
| F1_2 | -0.2235(5)  | 0.6061(3) | 0.2995(3) | 0.0364(9)  |
| F2_2 | -0.4155(4)  | 0.4882(3) | 0.2916(3) | 0.0380(9)  |
| F3_2 | -0.2915(4)  | 0.4857(3) | 0.1980(2) | 0.0298(8)  |
| C3_2 | -0.2942(7)  | 0.3529(4) | 0.3432(4) | 0.0243(13) |
| F4_2 | -0.2158(4)  | 0.3025(2) | 0.3756(2) | 0.0316(9)  |
| F5_2 | -0.3614(4)  | 0.3118(3) | 0.2602(2) | 0.0348(9)  |
| F6_2 | -0.3897(4)  | 0.3448(3) | 0.3912(2) | 0.0328(9)  |
| C4_2 | -0.1583(7)  | 0.5119(4) | 0.4413(4) | 0.0241(13) |
| F7_2 | -0.1215(4)  | 0.4565(3) | 0.4999(2) | 0.0304(8)  |
| F8_2 | -0.2629(4)  | 0.5340(3) | 0.4637(2) | 0.0326(9)  |
| F9_2 | -0.0517(4)  | 0.5931(2) | 0.4507(2) | 0.0332(9)  |
| O1_3 | 0.1620(5)   | 0.5193(3) | 0.2581(3) | 0.0203(9)  |
| C1_3 | 0.2014(6)   | 0.6066(4) | 0.2286(4) | 0.0215(12) |
| C2_3 | 0.3407(8)   | 0.6235(5) | 0.2015(5) | 0.0441(18) |
| F1_3 | 0.4467(5)   | 0.6474(4) | 0.2754(4) | 0.0624(14) |
| F2_3 | 0.3697(5)   | 0.6961(3) | 0.1516(3) | 0.0475(12) |
| F3_3 | 0.3462(6)   | 0.5479(3) | 0.1607(4) | 0.0597(15) |
| C3_3 | 0.0918(7)   | 0.6109(4) | 0.1479(4) | 0.0318(14) |
| F4_3 | -0.0353(4)  | 0.5684(3) | 0.1565(3) | 0.0457(11) |
| F5_3 | 0.1013(6)   | 0.5610(3) | 0.0744(3) | 0.0533(13) |
| F6_3 | 0.1054(4)   | 0.6987(2) | 0.1273(2) | 0.0308(8)  |
| C4_3 | 0.2251(8)   | 0.6883(4) | 0.3040(4) | 0.0356(16) |
| F7_3 | 0.0957(5)   | 0.6890(3) | 0.3128(3) | 0.0442(11) |
| F8_3 | 0.2915(4)   | 0.7763(2) | 0.2857(3) | 0.0345(9)  |
| F9_3 | 0.2811(6)   | 0.6742(3) | 0.3810(3) | 0.0581(15) |
| O1_4 | 0.0455(10)  | 0.3277(4) | 0.2831(6) | 0.0158(17) |
| C1_4 | 0.0188(10)  | 0.2610(5) | 0.2125(5) | 0.0192(17) |
| C2_4 | -0.0631(12) | 0.1622(6) | 0.2384(6) | 0.029(3)   |
| F1_4 | -0.1935(6)  | 0.1536(3) | 0.2377(5) | 0.0388(13) |
| F2_4 | -0.0678(8)  | 0.0879(3) | 0.1818(4) | 0.0453(17) |
| F3_4 | -0.0028(5)  | 0.1514(3) | 0.3192(3) | 0.0355(12) |
| C3_4 | 0.1582(10)  | 0.2603(5) | 0.1924(6) | 0.0270(17) |
| F4_4 | 0.2441(6)   | 0.3474(3) | 0.1933(3) | 0.0381(14) |
| F5_4 | 0.2194(6)   | 0.2169(4) | 0.2511(3) | 0.0375(13) |
| F6_4 | 0.1363(7)   | 0.2104(5) | 0.1119(3) | 0.0419(14) |
| C4_4 | -0.0708(11) | 0.2838(5) | 0.1293(5) | 0.0295(17) |
| F7_4 | 0.0073(6)   | 0.3586(3) | 0.0956(3) | 0.0410(15) |
| F8_4 | -0.1268(9)  | 0.2097(6) | 0.0644(5) | 0.0416(18) |
| F9_4 | -0.1740(6)  | 0.3081(4) | 0.1492(3) | 0.0408(14) |
| O1_5 | -0.1224(4)  | 0.9200(3) | 0.5862(2) | 0.0190(8)  |
| C1_5 | -0.1787(6)  | 0.9001(4) | 0.4981(3) | 0.0183(11) |
| C2_5 | -0.1077(6)  | 0.9883(4) | 0.4519(4) | 0.0208(12) |
| F1_5 | -0.1467(4)  | 1.0628(2) | 0.4724(2) | 0.0269(8)  |
| F2_5 | -0.1417(4)  | 0.9675(2) | 0.3634(2) | 0.0310(9)  |
| F3_5 | 0.0300(4)   | 1.0179(2) | 0.4787(2) | 0.0274(8)  |
| C3_5 | -0.1584(7)  | 0.8093(4) | 0.4551(4) | 0.0231(12) |
| F4_5 | -0.1689(4)  | 0.7442(2) | 0.5111(2) | 0.0304(9)  |
| F5_5 | -0.0339(4)  | 0.8307(2) | 0.4367(2) | 0.0286(8)  |
| F6_5 | -0.2536(4)  | 0.7692(2) | 0.3793(2) | 0.0297(8)  |
| C4_5 | -0.3370(6)  | 0.8812(4) | 0.4824(4) | 0.0233(12) |
| F7_5 | -0.4038(4)  | 0.7950(2) | 0.5022(3) | 0.0309(8)  |
| F8_5 | -0.3952(4)  | 0.8872(3) | 0.3989(2) | 0.0317(8)  |
| F9_5 | -0.3607(4)  | 0.9470(2) | 0.5341(2) | 0.0267(8)  |
| O1_6 | 0.0313(5)   | 0.9955(3) | 0.7589(3) | 0.0239(9)  |

|        |            |            |            |             |
|--------|------------|------------|------------|-------------|
| C1_6   | 0.0258(6)  | 1.0828(4)  | 0.7829(3)  | 0.0194(11)  |
| C2_6   | 0.1231(7)  | 1.1621(4)  | 0.7396(4)  | 0.0232(13)  |
| F1_6   | 0.2569(4)  | 1.1829(3)  | 0.7776(3)  | 0.0315(9)   |
| F2_6   | 0.0970(4)  | 1.2447(2)  | 0.7442(2)  | 0.0269(8)   |
| F3_6   | 0.1065(4)  | 1.1324(3)  | 0.6540(2)  | 0.0331(9)   |
| C3_6   | -0.1237(7) | 1.0844(4)  | 0.7560(4)  | 0.0221(12)  |
| F4_6   | -0.2153(4) | 1.0029(2)  | 0.7702(3)  | 0.0329(9)   |
| F5_6   | -0.1582(4) | 1.0933(2)  | 0.6701(2)  | 0.0264(8)   |
| F6_6   | -0.1410(4) | 1.1571(2)  | 0.8021(2)  | 0.0274(8)   |
| C4_6   | 0.0779(7)  | 1.1054(4)  | 0.8861(3)  | 0.0232(12)  |
| F7_6   | -0.0197(4) | 1.0542(3)  | 0.9252(2)  | 0.0325(9)   |
| F8_6   | 0.1106(4)  | 1.1984(2)  | 0.9154(2)  | 0.0312(9)   |
| F9_6   | 0.1915(4)  | 1.0828(3)  | 0.9144(2)  | 0.0306(8)   |
| O1_7   | 0.1317(4)  | 0.8960(3)  | 0.6393(3)  | 0.0218(8)   |
| C1_7   | 0.2583(6)  | 0.8881(4)  | 0.6572(4)  | 0.0225(12)  |
| C2_7   | 0.3705(7)  | 0.9902(4)  | 0.6806(5)  | 0.0335(15)  |
| F1_7   | 0.3796(5)  | 1.0295(3)  | 0.7620(3)  | 0.0414(10)  |
| F2_7   | 0.4978(5)  | 0.9925(3)  | 0.6763(4)  | 0.0508(12)  |
| F3_7   | 0.3379(5)  | 1.0495(3)  | 0.6252(3)  | 0.0444(11)  |
| C3_7   | 0.2759(7)  | 0.8358(4)  | 0.5725(4)  | 0.0271(13)  |
| F4_7   | 0.1646(4)  | 0.7592(3)  | 0.5396(3)  | 0.0342(9)   |
| F5_7   | 0.2911(5)  | 0.8943(3)  | 0.5098(3)  | 0.0407(10)  |
| F6_7   | 0.3864(4)  | 0.8081(3)  | 0.5896(3)  | 0.0409(10)  |
| C4_7   | 0.2777(7)  | 0.8291(4)  | 0.7372(4)  | 0.0293(13)  |
| F7_7   | 0.2005(5)  | 0.7362(3)  | 0.7121(3)  | 0.0408(10)  |
| F8_7   | 0.4082(5)  | 0.8358(3)  | 0.7674(3)  | 0.0459(11)  |
| F9_7   | 0.2344(5)  | 0.8603(3)  | 0.8040(2)  | 0.0378(9)   |
| O1_8   | -0.0790(5) | 0.7950(3)  | 0.7190(3)  | 0.0233(9)   |
| C1_8   | -0.1668(6) | 0.7314(3)  | 0.7583(3)  | 0.0187(11)  |
| C2_8   | -0.0844(7) | 0.7214(4)  | 0.8508(4)  | 0.0280(13)  |
| F1_8   | -0.0027(5) | 0.6704(3)  | 0.8423(2)  | 0.0352(9)   |
| F2_8   | -0.1694(5) | 0.6766(3)  | 0.9021(2)  | 0.0371(10)  |
| F3_8   | -0.0027(5) | 0.8075(3)  | 0.8939(2)  | 0.0346(9)   |
| C3_8   | -0.2907(7) | 0.7629(4)  | 0.7707(4)  | 0.0257(13)  |
| F4_8   | -0.3356(4) | 0.7998(3)  | 0.6992(2)  | 0.0323(8)   |
| F5_8   | -0.2497(5) | 0.8310(3)  | 0.8403(2)  | 0.0331(9)   |
| F6_8   | -0.3970(5) | 0.6900(3)  | 0.7841(3)  | 0.0407(10)  |
| C4_8   | -0.2260(7) | 0.6324(4)  | 0.6978(4)  | 0.0235(12)  |
| F7_8   | -0.3244(4) | 0.6312(2)  | 0.6295(2)  | 0.0302(8)   |
| F8_8   | -0.2768(5) | 0.5582(2)  | 0.7422(3)  | 0.0392(11)  |
| F9_8   | -0.1244(4) | 0.6160(2)  | 0.6659(2)  | 0.0304(8)   |
| C1_9   | 0.7105(7)  | 0.3491(4)  | 0.8570(4)  | 0.0195(12)  |
| Br1_9  | 0.43590(7) | 0.33134(5) | 1.05977(4) | 0.03289(17) |
| C2_9   | 0.6115(7)  | 0.2615(4)  | 0.8629(4)  | 0.0210(13)  |
| H2_9   | 0.599956   | 0.205264   | 0.825181   | 0.025       |
| C3_9   | 0.5298(7)  | 0.2560(4)  | 0.9238(4)  | 0.0244(13)  |
| H3_9   | 0.459116   | 0.197104   | 0.927006   | 0.029       |
| C4_9   | 0.5535(7)  | 0.3382(5)  | 0.9794(4)  | 0.0236(13)  |
| C5_9   | 0.6544(7)  | 0.4252(4)  | 0.9770(4)  | 0.0231(13)  |
| H5_9   | 0.668375   | 0.480201   | 1.017187   | 0.028       |
| C6_9   | 0.7352(7)  | 0.4314(4)  | 0.9156(4)  | 0.0205(12)  |
| H6_9   | 0.806073   | 0.490478   | 0.913080   | 0.025       |
| C1_10  | 0.9350(6)  | 0.4019(4)  | 0.8153(4)  | 0.0163(12)  |
| Br1_10 | 1.41136(8) | 0.56180(6) | 0.91205(5) | 0.0451(2)   |
| C2_10  | 1.0083(7)  | 0.3833(4)  | 0.8953(4)  | 0.0217(13)  |

|        |             |             |             |             |
|--------|-------------|-------------|-------------|-------------|
| H2_10  | 0.959655    | 0.338850    | 0.929885    | 0.026       |
| C3_10  | 1.1488(7)   | 0.4288(4)   | 0.9232(4)   | 0.0260(14)  |
| H3_10  | 1.198832    | 0.415775    | 0.976480    | 0.031       |
| C4_10  | 1.2179(7)   | 0.4952(4)   | 0.8720(4)   | 0.0239(13)  |
| C5_10  | 1.1470(7)   | 0.5141(4)   | 0.7927(4)   | 0.0255(14)  |
| H5_10  | 1.195549    | 0.559122    | 0.758526    | 0.031       |
| C6_10  | 1.0061(7)   | 0.4666(4)   | 0.7647(4)   | 0.0181(12)  |
| H6_10  | 0.956831    | 0.478015    | 0.710244    | 0.022       |
| C1_13  | 0.7197(7)   | 0.3143(4)   | 0.7052(4)   | 0.0170(12)  |
| C2_13  | 0.7912(7)   | 0.2842(4)   | 0.6458(4)   | 0.0177(12)  |
| H2_13  | 0.889607    | 0.301775    | 0.661845    | 0.021       |
| C3_13  | 0.7180(6)   | 0.2306(4)   | 0.5669(4)   | 0.0178(12)  |
| H3_13  | 0.766422    | 0.209455    | 0.529032    | 0.021       |
| C4_13  | 0.5699(6)   | 0.2047(4)   | 0.5385(3)   | 0.0159(11)  |
| C5_13  | 0.5040(7)   | 0.2447(4)   | 0.5948(4)   | 0.0201(12)  |
| H5_13  | 0.407423    | 0.234053    | 0.575553    | 0.024       |
| C6_13  | 0.5746(7)   | 0.2972(4)   | 0.6746(4)   | 0.0207(12)  |
| H6_13  | 0.527490    | 0.322779    | 0.710318    | 0.025       |
| C1_14  | 0.3447(6)   | 0.0325(4)   | 0.2912(4)   | 0.0171(12)  |
| C2_14  | 0.4897(7)   | 0.0528(4)   | 0.3212(4)   | 0.0186(12)  |
| H2_14  | 0.537712    | 0.029458    | 0.284509    | 0.022       |
| C3_14  | 0.5613(6)   | 0.1050(4)   | 0.4015(4)   | 0.0179(12)  |
| H3_14  | 0.657933    | 0.116040    | 0.420899    | 0.021       |
| C4_14  | 0.4925(6)   | 0.1436(4)   | 0.4571(4)   | 0.0167(11)  |
| C5_14  | 0.3453(7)   | 0.1173(4)   | 0.4284(4)   | 0.0198(12)  |
| H5_14  | 0.296266    | 0.138102    | 0.466028    | 0.024       |
| C6_14  | 0.2725(7)   | 0.0634(4)   | 0.3488(4)   | 0.0200(12)  |
| H6_14  | 0.174199    | 0.046390    | 0.331881    | 0.024       |
| Br1_11 | -0.33799(8) | -0.24481(6) | 0.08472(5)  | 0.0449(2)   |
| C1_11  | 0.1308(6)   | -0.0636(4)  | 0.1815(4)   | 0.0171(12)  |
| C2_11  | 0.0599(6)   | -0.0572(4)  | 0.0977(4)   | 0.0193(12)  |
| H2_11  | 0.107726    | -0.016664   | 0.060213    | 0.023       |
| C3_11  | -0.0811(7)  | -0.1102(4)  | 0.0686(4)   | 0.0234(13)  |
| H3_11  | -0.131079   | -0.106464   | 0.011289    | 0.028       |
| C4_11  | -0.1476(7)  | -0.1690(5)  | 0.1255(4)   | 0.0257(14)  |
| C5_11  | -0.0790(7)  | -0.1751(4)  | 0.2093(4)   | 0.0232(13)  |
| H5_11  | -0.127456   | -0.215142   | 0.246836    | 0.028       |
| C6_11  | 0.0630(7)   | -0.1215(4)  | 0.2385(4)   | 0.0193(12)  |
| H6_11  | 0.112496    | -0.124498   | 0.296256    | 0.023       |
| C1_12  | 0.3565(6)   | -0.0109(4)  | 0.1409(3)   | 0.0171(12)  |
| Br1_12 | 0.63200(7)  | -0.00056(5) | -0.06009(4) | 0.03654(18) |
| C2_12  | 0.3414(7)   | -0.0966(4)  | 0.0922(4)   | 0.0249(14)  |
| H2_12  | 0.277343    | -0.156221   | 0.100764    | 0.030       |
| C3_12  | 0.4218(7)   | -0.0931(5)  | 0.0307(4)   | 0.0279(14)  |
| H3_12  | 0.412177    | -0.150392   | -0.004654   | 0.033       |
| C4_12  | 0.5180(7)   | -0.0041(5)  | 0.0209(4)   | 0.0255(14)  |
| C5_12  | 0.5292(7)   | 0.0800(5)   | 0.0683(4)   | 0.0261(14)  |
| H5_12  | 0.592804    | 0.139642    | 0.059387    | 0.031       |
| C6_12  | 0.4485(7)   | 0.0782(4)   | 0.1288(4)   | 0.0221(13)  |
| H6_12  | 0.455064    | 0.136297    | 0.161617    | 0.026       |
| O1_15  | 0.026(6)    | 0.330(2)    | 0.269(3)    | 0.032(17)   |
| C1_15  | -0.014(2)   | 0.2583(15)  | 0.1998(16)  | 0.017(12)   |
| C2_15  | -0.121(3)   | 0.2804(16)  | 0.1262(17)  | 0.018(10)   |
| F1_15  | -0.243(3)   | 0.2616(19)  | 0.1483(17)  | 0.039(7)    |
| F2_15  | -0.144(4)   | 0.227(2)    | 0.0493(18)  | 0.024(9)    |

|       |           |            |            |           |
|-------|-----------|------------|------------|-----------|
| F3_15 | -0.073(2) | 0.3742(12) | 0.1172(14) | 0.026(5)  |
| C3_15 | 0.114(2)  | 0.2558(16) | 0.1652(16) | 0.016(10) |
| F4_15 | 0.219(2)  | 0.261(2)   | 0.2319(15) | 0.027(6)  |
| F5_15 | 0.158(2)  | 0.3308(13) | 0.1207(14) | 0.031(6)  |
| F6_15 | 0.088(3)  | 0.1758(16) | 0.1109(17) | 0.031(8)  |
| C4_15 | -0.083(3) | 0.1592(16) | 0.2303(16) | 0.012(12) |
| F7_15 | 0.014(2)  | 0.1291(16) | 0.2774(17) | 0.029(6)  |
| F8_15 | -0.150(3) | 0.0905(14) | 0.1616(12) | 0.022(5)  |
| F9_15 | -0.169(3) | 0.1633(17) | 0.2817(17) | 0.026(6)  |

Table S 17 Atomic coordinates and  $U_{eq}$  [ $\text{\AA}^2$ ] for S3

| Atom | x           | y            | z           | $U_{eq}$    |
|------|-------------|--------------|-------------|-------------|
| Al1  | 0.62351(6)  | 0.25485(5)   | 0.38363(4)  | 0.01479(17) |
| N01A | 0.10047(18) | 0.35662(15)  | 0.73542(11) | 0.0199(5)   |
| O1_1 | 0.53969(14) | 0.33396(12)  | 0.36608(9)  | 0.0198(4)   |
| C1_1 | 0.4887(2)   | 0.39544(18)  | 0.38621(13) | 0.0210(6)   |
| C2_1 | 0.4330(2)   | 0.4444(2)    | 0.33277(15) | 0.0320(7)   |
| F1_1 | 0.49279(16) | 0.49648(13)  | 0.31199(9)  | 0.0391(5)   |
| F2_1 | 0.36067(16) | 0.49068(14)  | 0.34565(10) | 0.0470(6)   |
| F3_1 | 0.39636(15) | 0.39157(14)  | 0.29082(9)  | 0.0415(5)   |
| C3_1 | 0.4159(2)   | 0.3574(2)    | 0.42090(16) | 0.0326(7)   |
| F4_1 | 0.45822(16) | 0.29881(13)  | 0.45730(10) | 0.0418(5)   |
| F5_1 | 0.34264(14) | 0.32078(14)  | 0.38505(11) | 0.0463(6)   |
| F6_1 | 0.37863(14) | 0.41484(13)  | 0.45193(10) | 0.0399(5)   |
| C4_1 | 0.5569(2)   | 0.45750(18)  | 0.42540(13) | 0.0247(6)   |
| F7_1 | 0.58072(14) | 0.42855(12)  | 0.47920(8)  | 0.0308(4)   |
| F8_1 | 0.51570(15) | 0.53316(11)  | 0.42843(9)  | 0.0354(5)   |
| F9_1 | 0.63717(13) | 0.46882(12)  | 0.40538(8)  | 0.0303(4)   |
| O1_2 | 0.68685(14) | 0.24533(12)  | 0.32783(8)  | 0.0185(4)   |
| C1_2 | 0.7292(2)   | 0.28421(18)  | 0.28772(13) | 0.0207(6)   |
| C2_2 | 0.6627(2)   | 0.35282(18)  | 0.25408(13) | 0.0244(6)   |
| F1_2 | 0.66499(15) | 0.42268(11)  | 0.28598(9)  | 0.0331(4)   |
| F2_2 | 0.68799(15) | 0.37366(12)  | 0.20417(8)  | 0.0349(5)   |
| F3_2 | 0.57191(12) | 0.32692(11)  | 0.24253(8)  | 0.0273(4)   |
| C3_2 | 0.7494(2)   | 0.2162(2)    | 0.24422(14) | 0.0294(7)   |
| F4_2 | 0.78907(15) | 0.14850(13)  | 0.27141(9)  | 0.0391(5)   |
| F5_2 | 0.66866(15) | 0.19249(12)  | 0.20957(8)  | 0.0341(4)   |
| F6_2 | 0.80931(16) | 0.24398(14)  | 0.21014(10) | 0.0455(6)   |
| C4_2 | 0.8244(2)   | 0.3267(2)    | 0.31780(16) | 0.0348(8)   |
| F7_2 | 0.89144(14) | 0.26904(16)  | 0.33549(11) | 0.0499(6)   |
| F8_2 | 0.85990(16) | 0.37918(16)  | 0.28236(10) | 0.0522(6)   |
| F9_2 | 0.81132(15) | 0.37043(14)  | 0.36361(9)  | 0.0418(5)   |
| O1_3 | 0.56818(15) | 0.16019(12)  | 0.39213(9)  | 0.0206(4)   |
| C1_3 | 0.5188(2)   | 0.09410(17)  | 0.36453(12) | 0.0188(6)   |
| C2_3 | 0.4422(2)   | 0.12408(18)  | 0.31222(13) | 0.0243(6)   |
| F1_3 | 0.36910(14) | 0.16193(13)  | 0.33052(9)  | 0.0369(5)   |
| F2_3 | 0.40585(14) | 0.06129(12)  | 0.27760(8)  | 0.0319(4)   |
| F3_3 | 0.48011(15) | 0.17930(12)  | 0.28063(8)  | 0.0369(5)   |
| C3_3 | 0.5895(2)   | 0.03151(19)  | 0.34331(13) | 0.0245(6)   |
| F4_3 | 0.66777(13) | 0.02109(13)  | 0.38361(9)  | 0.0352(5)   |
| F5_3 | 0.61742(15) | 0.05981(13)  | 0.29596(8)  | 0.0355(5)   |
| F6_3 | 0.55045(14) | -0.04467(11) | 0.33085(9)  | 0.0311(4)   |
| C4_3 | 0.4684(2)   | 0.04832(18)  | 0.40901(13) | 0.0233(6)   |



|       |             |              |             |             |
|-------|-------------|--------------|-------------|-------------|
| F7_3  | 0.53214(15) | 0.00723(12)  | 0.44763(8)  | 0.0326(4)   |
| F8_3  | 0.40244(14) | -0.00729(12) | 0.38401(9)  | 0.0329(4)   |
| F9_3  | 0.42347(14) | 0.10249(12)  | 0.43772(9)  | 0.0323(4)   |
| O1_4  | 0.69725(14) | 0.27979(12)  | 0.44836(9)  | 0.0202(4)   |
| C1_4  | 0.7593(2)   | 0.25269(18)  | 0.49597(13) | 0.0223(6)   |
| C2_4  | 0.8486(2)   | 0.2105(2)    | 0.47947(14) | 0.0302(7)   |
| F1_4  | 0.90899(14) | 0.26815(16)  | 0.46514(10) | 0.0488(6)   |
| F2_4  | 0.89903(14) | 0.16517(13)  | 0.52278(9)  | 0.0383(5)   |
| F3_4  | 0.82371(14) | 0.16034(13)  | 0.43421(8)  | 0.0365(5)   |
| C3_4  | 0.7092(2)   | 0.1880(2)    | 0.53052(14) | 0.0304(7)   |
| F4_4  | 0.61935(15) | 0.21125(16)  | 0.53156(10) | 0.0484(6)   |
| F5_4  | 0.70511(15) | 0.11257(12)  | 0.50655(9)  | 0.0358(5)   |
| F6_4  | 0.75477(17) | 0.18014(15)  | 0.58568(8)  | 0.0444(5)   |
| C4_4  | 0.7911(3)   | 0.3307(2)    | 0.53485(16) | 0.0423(9)   |
| F7_4  | 0.7229(2)   | 0.35375(16)  | 0.56378(10) | 0.0605(7)   |
| F8_4  | 0.87114(18) | 0.31467(14)  | 0.57432(10) | 0.0558(7)   |
| F9_4  | 0.80982(19) | 0.39498(13)  | 0.50341(11) | 0.0585(7)   |
| C1_7  | 0.1132(2)   | 0.37335(18)  | 0.79629(13) | 0.0194(6)   |
| Br1_7 | 0.13326(3)  | 0.43835(2)   | 0.99137(2)  | 0.03388(10) |
| C2_7  | 0.1514(2)   | 0.45028(18)  | 0.81783(14) | 0.0220(6)   |
| H2_7  | 0.171550    | 0.490150     | 0.792351    | 0.026       |
| C3_7  | 0.1601(2)   | 0.46877(19)  | 0.87595(14) | 0.0226(6)   |
| H3_7  | 0.185857    | 0.521317     | 0.890645    | 0.027       |
| C4_7  | 0.1310(2)   | 0.41034(19)  | 0.91252(13) | 0.0224(6)   |
| C5_7  | 0.0965(2)   | 0.33267(19)  | 0.89216(14) | 0.0265(7)   |
| H5_7  | 0.078814    | 0.292132     | 0.918067    | 0.032       |
| C6_7  | 0.0878(2)   | 0.31430(19)  | 0.83426(14) | 0.0243(7)   |
| H6_7  | 0.064255    | 0.260814     | 0.820136    | 0.029       |
| C1_6  | 0.1002(2)   | 0.27138(17)  | 0.71607(12) | 0.0179(6)   |
| Br1_6 | 0.10710(2)  | 0.00141(2)   | 0.64049(2)  | 0.02557(8)  |
| C2_6  | 0.1824(2)   | 0.22207(19)  | 0.73097(13) | 0.0206(6)   |
| H2_6  | 0.237493    | 0.243972     | 0.756001    | 0.025       |
| C3_6  | 0.1842(2)   | 0.14122(18)  | 0.70939(13) | 0.0200(6)   |
| H3_6  | 0.240095    | 0.107299     | 0.719641    | 0.024       |
| C4_6  | 0.1034(2)   | 0.11008(17)  | 0.67263(13) | 0.0178(6)   |
| C5_6  | 0.0206(2)   | 0.15712(18)  | 0.65867(13) | 0.0189(6)   |
| H5_6  | -0.034808   | 0.134460     | 0.634357    | 0.023       |
| C6_6  | 0.0190(2)   | 0.23804(18)  | 0.68058(13) | 0.0200(6)   |
| H6_6  | -0.037853   | 0.270971     | 0.671292    | 0.024       |
| C1_8  | 0.0492(2)   | 0.41578(18)  | 0.69617(13) | 0.0180(6)   |
| Br1_8 | -0.12143(2) | 0.59971(2)   | 0.55863(2)  | 0.03178(9)  |
| C2_8  | 0.0729(2)   | 0.42650(17)  | 0.64166(13) | 0.0181(6)   |
| C3_8  | 0.0231(2)   | 0.48057(18)  | 0.60053(13) | 0.0190(6)   |
| H3_8  | 0.040416    | 0.486090     | 0.563453    | 0.023       |
| C4_8  | -0.0523(2)  | 0.52622(18)  | 0.61468(13) | 0.0209(6)   |
| C5_8  | -0.0772(2)  | 0.51905(19)  | 0.66884(15) | 0.0247(7)   |
| H5_8  | -0.128638   | 0.551565     | 0.678282    | 0.030       |
| C6_8  | -0.0266(2)  | 0.46404(19)  | 0.70922(14) | 0.0225(6)   |
| H6_8  | -0.043745   | 0.459156     | 0.746369    | 0.027       |
| N1_5  | 0.38327(18) | 0.24390(16)  | 0.59101(11) | 0.0215(5)   |
| C1_5  | 0.2442(2)   | 0.39631(18)  | 0.65557(13) | 0.0195(6)   |
| H1_5  | 0.253886    | 0.439579     | 0.683980    | 0.023       |
| N2_5  | 0.15299(17) | 0.38002(14)  | 0.62694(10) | 0.0165(5)   |
| C3_5  | 0.3090(2)   | 0.28807(18)  | 0.60255(12) | 0.0178(6)   |
| C4_5  | 0.2127(2)   | 0.27247(18)  | 0.57342(12) | 0.0188(6)   |

|       |           |             |             |           |
|-------|-----------|-------------|-------------|-----------|
| H4_5  | 0.200488  | 0.229712    | 0.544713    | 0.023     |
| C5_5  | 0.1387(2) | 0.31824(18) | 0.58643(12) | 0.0178(6) |
| H5_5  | 0.075068  | 0.306762    | 0.566660    | 0.021     |
| C6_5  | 0.4812(2) | 0.2583(2)   | 0.62220(15) | 0.0301(7) |
| H6A_5 | 0.520909  | 0.208766    | 0.618393    | 0.045     |
| H6B_5 | 0.480084  | 0.268321    | 0.663288    | 0.045     |
| H6C_5 | 0.508468  | 0.307513    | 0.605884    | 0.045     |
| C7_5  | 0.3689(2) | 0.1801(2)   | 0.54567(15) | 0.0273(7) |
| H7A_5 | 0.332824  | 0.204444    | 0.509783    | 0.041     |
| H7B_5 | 0.332618  | 0.132816    | 0.557700    | 0.041     |
| H7C_5 | 0.431638  | 0.160136    | 0.539014    | 0.041     |
| C2_5  | 0.3207(2) | 0.35307(18) | 0.64484(13) | 0.0199(6) |
| H2_5  | 0.383171  | 0.366038    | 0.665722    | 0.024     |

Table S 18 Atomic coordinates and  $U_{eq}$  [ $\text{\AA}^2$ ] for *S4a*

| Atom | x            | y           | z           | $U_{eq}$    |
|------|--------------|-------------|-------------|-------------|
| Al04 | 0.13750(4)   | 0.46500(3)  | 0.64446(2)  | 0.01661(14) |
| N1   | 0.58600(10)  | 0.28456(7)  | 0.58272(5)  | 0.0149(4)   |
| O1_1 | 0.2098(9)    | 0.5139(7)   | 0.6403(6)   | 0.031(3)    |
| C1_1 | 0.2696(5)    | 0.5430(3)   | 0.6564(2)   | 0.0219(17)  |
| C2_1 | 0.3307(3)    | 0.5515(2)   | 0.62257(15) | 0.0306(12)  |
| F1_1 | 0.3747(8)    | 0.5072(5)   | 0.6168(4)   | 0.045(3)    |
| F2_1 | 0.3807(2)    | 0.59257(18) | 0.63026(11) | 0.0404(10)  |
| F3_1 | 0.2958(6)    | 0.5631(4)   | 0.5882(2)   | 0.0434(18)  |
| C3_1 | 0.2391(3)    | 0.5998(2)   | 0.67052(15) | 0.0290(12)  |
| F4_1 | 0.1726(6)    | 0.5950(6)   | 0.6910(4)   | 0.036(3)    |
| F5_1 | 0.2221(4)    | 0.6327(3)   | 0.63989(15) | 0.0365(13)  |
| F6_1 | 0.2903(8)    | 0.6274(5)   | 0.6933(4)   | 0.034(2)    |
| C4_1 | 0.3102(3)    | 0.51301(19) | 0.69171(14) | 0.0257(11)  |
| F7_1 | 0.2673(4)    | 0.5167(2)   | 0.72449(17) | 0.0353(12)  |
| F8_1 | 0.3814(2)    | 0.53388(18) | 0.69963(14) | 0.0375(10)  |
| F9_1 | 0.3179(7)    | 0.4600(3)   | 0.6835(3)   | 0.0371(16)  |
| O1_2 | 0.06357(9)   | 0.47669(6)  | 0.61020(4)  | 0.0193(3)   |
| C1_2 | 0.01284(12)  | 0.51341(9)  | 0.59397(6)  | 0.0179(4)   |
| C2_2 | 0.05665(14)  | 0.55165(10) | 0.56431(7)  | 0.0269(5)   |
| F1_2 | 0.09772(9)   | 0.59062(6)  | 0.58366(5)  | 0.0387(4)   |
| F2_2 | 0.00777(9)   | 0.57774(6)  | 0.53947(4)  | 0.0353(4)   |
| F3_2 | 0.10780(9)   | 0.52338(6)  | 0.54245(4)  | 0.0363(4)   |
| C3_2 | -0.05181(14) | 0.48030(10) | 0.57129(7)  | 0.0243(5)   |
| F4_2 | -0.07820(8)  | 0.43878(6)  | 0.59343(4)  | 0.0305(3)   |
| F5_2 | -0.02224(9)  | 0.45878(6)  | 0.53817(4)  | 0.0346(4)   |
| F6_2 | -0.11414(8)  | 0.51125(6)  | 0.56156(5)  | 0.0368(4)   |
| C4_2 | -0.02707(13) | 0.54917(9)  | 0.62655(7)  | 0.0219(5)   |
| F7_2 | -0.08083(8)  | 0.52066(6)  | 0.64671(4)  | 0.0293(3)   |
| F8_2 | -0.06345(8)  | 0.59367(6)  | 0.61148(4)  | 0.0316(3)   |
| F9_2 | 0.02647(8)   | 0.56697(6)  | 0.65255(4)  | 0.0287(3)   |
| O1_3 | 0.10127(9)   | 0.46566(6)  | 0.69265(4)  | 0.0227(3)   |
| C1_3 | 0.06886(14)  | 0.43493(10) | 0.72202(7)  | 0.0244(5)   |
| C2_3 | 0.02328(17)  | 0.38447(12) | 0.70561(7)  | 0.0368(6)   |
| F1_3 | 0.07299(11)  | 0.34279(6)  | 0.69749(5)  | 0.0463(4)   |
| F2_3 | -0.03059(10) | 0.36454(7)  | 0.73099(4)  | 0.0465(4)   |
| F3_3 | -0.01351(10) | 0.39670(7)  | 0.67210(4)  | 0.0448(4)   |
| C3_3 | 0.01128(16)  | 0.47194(11) | 0.74594(7)  | 0.0336(6)   |

|        |              |             |             |            |
|--------|--------------|-------------|-------------|------------|
| F4_3   | 0.04041(10)  | 0.52152(6)  | 0.75169(5)  | 0.0440(4)  |
| F5_3   | -0.05630(9)  | 0.47819(8)  | 0.72582(5)  | 0.0493(4)  |
| F6_3   | -0.00768(10) | 0.45012(7)  | 0.78120(4)  | 0.0438(4)  |
| C4_3   | 0.13574(17)  | 0.41473(10) | 0.75017(7)  | 0.0324(6)  |
| F7_3   | 0.16341(10)  | 0.45633(6)  | 0.77235(4)  | 0.0420(4)  |
| F8_3   | 0.11016(10)  | 0.37599(6)  | 0.77579(4)  | 0.0398(4)  |
| F9_3   | 0.19597(10)  | 0.39457(7)  | 0.73033(5)  | 0.0422(4)  |
| O1_4   | 0.17363(9)   | 0.39971(6)  | 0.63598(5)  | 0.0237(4)  |
| C1_4   | 0.20028(13)  | 0.36218(10) | 0.60964(7)  | 0.0250(5)  |
| C2_4   | 0.25742(15)  | 0.38887(11) | 0.57924(8)  | 0.0320(6)  |
| F1_4   | 0.32746(8)   | 0.39940(7)  | 0.59597(5)  | 0.0439(4)  |
| F2_4   | 0.27067(9)   | 0.35694(7)  | 0.54748(5)  | 0.0409(4)  |
| F3_4   | 0.22875(9)   | 0.43663(6)  | 0.56608(5)  | 0.0373(4)  |
| C3_4   | 0.13010(15)  | 0.33602(11) | 0.58683(7)  | 0.0309(6)  |
| F4_4   | 0.07048(8)   | 0.32502(7)  | 0.61132(4)  | 0.0383(4)  |
| F5_4   | 0.10271(8)   | 0.37067(6)  | 0.55904(4)  | 0.0346(3)  |
| F6_4   | 0.14929(10)  | 0.28912(7)  | 0.56839(5)  | 0.0463(4)  |
| C4_4   | 0.24496(16)  | 0.31661(11) | 0.63312(8)  | 0.0373(6)  |
| F7_4   | 0.19425(10)  | 0.28336(7)  | 0.65175(5)  | 0.0473(4)  |
| F8_4   | 0.29046(10)  | 0.28563(7)  | 0.60936(5)  | 0.0534(5)  |
| F9_4   | 0.29143(9)   | 0.33920(7)  | 0.66044(5)  | 0.0451(4)  |
| O1_5   | 0.2051(9)    | 0.5182(6)   | 0.6380(5)   | 0.021(2)   |
| C1_5   | 0.2655(5)    | 0.5504(3)   | 0.6510(2)   | 0.0233(17) |
| C2_5   | 0.2417(3)    | 0.5757(2)   | 0.69191(15) | 0.0329(13) |
| F1_5   | 0.2506(4)    | 0.5380(2)   | 0.72068(16) | 0.0396(13) |
| F2_5   | 0.2892(9)    | 0.6180(5)   | 0.7011(4)   | 0.040(2)   |
| F3_5   | 0.1680(6)    | 0.5916(6)   | 0.6927(4)   | 0.037(3)   |
| C3_5   | 0.2799(3)    | 0.5985(2)   | 0.62096(14) | 0.0314(12) |
| F4_5   | 0.2787(5)    | 0.5800(3)   | 0.5841(2)   | 0.0374(15) |
| F5_5   | 0.2235(4)    | 0.6364(3)   | 0.62385(15) | 0.0365(12) |
| F6_5   | 0.3493(2)    | 0.62368(19) | 0.62696(11) | 0.0425(10) |
| C4_5   | 0.3427(3)    | 0.5169(2)   | 0.65557(16) | 0.0366(13) |
| F7_5   | 0.3746(7)    | 0.5061(6)   | 0.6204(4)   | 0.050(3)   |
| F8_5   | 0.3964(3)    | 0.54281(19) | 0.67862(16) | 0.0502(12) |
| F9_5   | 0.3284(7)    | 0.4685(3)   | 0.6726(3)   | 0.0449(19) |
| C1_6   | 0.74579(12)  | 0.26848(9)  | 0.61982(6)  | 0.0146(4)  |
| N1_6   | 0.77733(10)  | 0.25413(7)  | 0.65537(5)  | 0.0165(4)  |
| N2_6   | 0.76447(10)  | 0.32189(7)  | 0.61365(5)  | 0.0152(4)  |
| C3_6   | 0.80762(13)  | 0.34106(9)  | 0.64590(6)  | 0.0190(5)  |
| H3_6   | 0.828298     | 0.377167    | 0.649095    | 0.023      |
| C4_6   | 0.78993(13)  | 0.19876(9)  | 0.67136(6)  | 0.0188(5)  |
| C5_6   | 0.72897(13)  | 0.17231(9)  | 0.69220(7)  | 0.0215(5)  |
| C6_6   | 0.74623(16)  | 0.11993(10) | 0.70637(8)  | 0.0296(6)  |
| H6_6   | 0.706296     | 0.099791    | 0.719950    | 0.036      |
| C7_6   | 0.81983(16)  | 0.09642(10) | 0.70122(8)  | 0.0322(6)  |
| H7_6   | 0.829868     | 0.060642    | 0.711469    | 0.039      |
| C8_6   | 0.87851(15)  | 0.12402(10) | 0.68154(8)  | 0.0283(6)  |
| H8_6   | 0.928994     | 0.107252    | 0.678610    | 0.034      |
| C9_6   | 0.86564(13)  | 0.17640(9)  | 0.66566(7)  | 0.0218(5)  |
| C10_6  | 0.65008(13)  | 0.19982(9)  | 0.70106(7)  | 0.0230(5)  |
| H10_6  | 0.632206     | 0.219419    | 0.676463    | 0.028      |
| C11_6  | 0.58605(15)  | 0.15918(11) | 0.71298(8)  | 0.0322(6)  |
| H11A_6 | 0.535195     | 0.178403    | 0.715039    | 0.048      |
| H11B_6 | 0.599424     | 0.142779    | 0.738775    | 0.048      |
| H11C_6 | 0.582183     | 0.130130    | 0.692826    | 0.048      |

|        |             |             |            |            |
|--------|-------------|-------------|------------|------------|
| C12_6  | 0.65952(15) | 0.24255(10) | 0.73441(8) | 0.0305(6)  |
| H12A_6 | 0.608308    | 0.260080    | 0.739656   | 0.046      |
| H12B_6 | 0.697946    | 0.270579    | 0.726212   | 0.046      |
| H12C_6 | 0.678317    | 0.224271    | 0.758637   | 0.046      |
| C13_6  | 0.93360(14) | 0.20582(10) | 0.64483(7) | 0.0257(5)  |
| H13_6  | 0.912861    | 0.241253    | 0.633823   | 0.031      |
| C14_6  | 0.99900(15) | 0.21948(11) | 0.67487(8) | 0.0333(6)  |
| H14A_6 | 1.041417    | 0.239828    | 0.661461   | 0.050      |
| H14B_6 | 1.020391    | 0.185275    | 0.686003   | 0.050      |
| H14C_6 | 0.977019    | 0.242076    | 0.696373   | 0.050      |
| C15_6  | 0.96822(15) | 0.17247(13) | 0.61035(8) | 0.0380(7)  |
| H15A_6 | 1.010571    | 0.193633    | 0.597562   | 0.057      |
| H15B_6 | 0.926514    | 0.164667    | 0.590870   | 0.057      |
| H15C_6 | 0.989754    | 0.137753    | 0.620536   | 0.057      |
| C16_6  | 0.75368(13) | 0.35542(9)  | 0.57799(6) | 0.0158(4)  |
| C17_6  | 0.79433(12) | 0.34066(9)  | 0.54326(6) | 0.0176(4)  |
| C18_6  | 0.78677(13) | 0.37607(9)  | 0.51065(7) | 0.0206(5)  |
| H18_6  | 0.813718    | 0.367641    | 0.486584   | 0.025      |
| C19_6  | 0.74106(14) | 0.42288(9)  | 0.51274(7) | 0.0229(5)  |
| H19_6  | 0.735825    | 0.445933    | 0.490043   | 0.027      |
| C20_6  | 0.70282(13) | 0.43646(9)  | 0.54766(7) | 0.0199(5)  |
| H20_6  | 0.670991    | 0.468691    | 0.548468   | 0.024      |
| C21_6  | 0.70961(12) | 0.40427(9)  | 0.58169(6) | 0.0169(4)  |
| C22_6  | 0.85015(13) | 0.29178(9)  | 0.53985(7) | 0.0205(5)  |
| H22_6  | 0.845168    | 0.269604    | 0.564811   | 0.025      |
| C23_6  | 0.82932(15) | 0.25403(10) | 0.50460(7) | 0.0283(5)  |
| H23A_6 | 0.864542    | 0.221966    | 0.504656   | 0.042      |
| H23B_6 | 0.835874    | 0.274353    | 0.479609   | 0.042      |
| H23C_6 | 0.774282    | 0.241729    | 0.507075   | 0.042      |
| C24_6  | 0.93591(14) | 0.31172(11) | 0.53685(8) | 0.0304(6)  |
| H24A_6 | 0.971495    | 0.279883    | 0.535724   | 0.046      |
| H24B_6 | 0.948795    | 0.334153    | 0.560216   | 0.046      |
| H24C_6 | 0.942348    | 0.333878    | 0.512682   | 0.046      |
| C25_6  | 0.67677(13) | 0.42618(9)  | 0.62077(6) | 0.0189(5)  |
| H25_6  | 0.676047    | 0.395511    | 0.640628   | 0.023      |
| C26_6  | 0.59312(14) | 0.44959(10) | 0.61712(7) | 0.0260(5)  |
| H26A_6 | 0.572294    | 0.457673    | 0.643718   | 0.039      |
| H26B_6 | 0.558858    | 0.422590    | 0.603958   | 0.039      |
| H26C_6 | 0.594560    | 0.483518    | 0.601345   | 0.039      |
| C27_6  | 0.73177(14) | 0.47222(9)  | 0.63642(7) | 0.0237(5)  |
| H27A_6 | 0.712582    | 0.485041    | 0.662347   | 0.036      |
| H27B_6 | 0.731927    | 0.502991    | 0.617548   | 0.036      |
| H27C_6 | 0.785665    | 0.457809    | 0.639286   | 0.036      |
| C2_6   | 0.81481(13) | 0.29928(9)  | 0.67177(7) | 0.0199(5)  |
| H2_6   | 0.840928    | 0.300531    | 0.696808   | 0.024      |
| C1_9   | 0.55754(12) | 0.31823(9)  | 0.55089(6) | 0.0160(4)  |
| Br1_9  | 0.49578(2)  | 0.45118(2)  | 0.45529(2) | 0.02369(6) |
| C2_9   | 0.60009(13) | 0.32178(9)  | 0.51545(6) | 0.0188(5)  |
| H2_9   | 0.643884    | 0.297963    | 0.511162   | 0.023      |
| C3_9   | 0.57946(13) | 0.35940(9)  | 0.48653(7) | 0.0195(5)  |
| H3_9   | 0.608887    | 0.361470    | 0.462477   | 0.023      |
| C4_9   | 0.51571(13) | 0.39415(9)  | 0.49270(6) | 0.0190(5)  |
| C5_9   | 0.46988(13) | 0.38938(9)  | 0.52641(7) | 0.0203(5)  |
| H5_9   | 0.424827    | 0.412280    | 0.529934   | 0.024      |
| C6_9   | 0.49001(12) | 0.35080(9)  | 0.55525(6) | 0.0186(5)  |

|        |             |             |            |            |
|--------|-------------|-------------|------------|------------|
| H6_9   | 0.457522    | 0.346562    | 0.578138   | 0.022      |
| C1_10  | 0.53331(12) | 0.27324(9)  | 0.61572(6) | 0.0151(4)  |
| Br1_10 | 0.36618(2)  | 0.23652(2)  | 0.72289(2) | 0.02899(6) |
| C2_10  | 0.52691(13) | 0.31073(9)  | 0.64658(6) | 0.0201(5)  |
| H2_10  | 0.557395    | 0.343591    | 0.646041   | 0.024      |
| C3_10  | 0.47636(13) | 0.30070(10) | 0.67829(7) | 0.0228(5)  |
| H3_10  | 0.471374    | 0.326772    | 0.699218   | 0.027      |
| C4_10  | 0.43346(13) | 0.25247(10) | 0.67907(7) | 0.0207(5)  |
| C5_10  | 0.43932(13) | 0.21424(10) | 0.64888(7) | 0.0232(5)  |
| H5_10  | 0.409961    | 0.180911    | 0.649976   | 0.028      |
| C6_10  | 0.48874(13) | 0.22519(9)  | 0.61689(7) | 0.0212(5)  |
| H6_10  | 0.492161    | 0.199601    | 0.595571   | 0.025      |
| C1_11  | 0.63522(12) | 0.23880(8)  | 0.57240(6) | 0.0149(4)  |
| Br1_11 | 0.78475(2)  | 0.08255(2)  | 0.54358(2) | 0.02615(6) |
| C2_11  | 0.70787(12) | 0.22977(8)  | 0.59170(6) | 0.0141(4)  |
| C3_11  | 0.75005(12) | 0.18170(8)  | 0.58281(6) | 0.0156(4)  |
| H3_11  | 0.798567    | 0.174492    | 0.596140   | 0.019      |
| C4_11  | 0.72241(13) | 0.14484(9)  | 0.55514(6) | 0.0179(5)  |
| C5_11  | 0.65236(13) | 0.15393(9)  | 0.53515(6) | 0.0188(5)  |
| H5_11  | 0.633992    | 0.128575    | 0.515698   | 0.023      |
| C6_11  | 0.60961(12) | 0.20063(9)  | 0.54403(6) | 0.0180(5)  |
| H6_11  | 0.561172    | 0.207110    | 0.530439   | 0.022      |

Table S 19 Atomic coordinates and  $U_{eq}$  [ $\text{\AA}^2$ ] for  $[\text{FeCp}^*_2][\text{Al}(\text{OR}^f)_4]$

| Atom | x          | y           | z           | $U_{eq}$   |
|------|------------|-------------|-------------|------------|
| Fe1  | 0.64351(4) | 0.96557(6)  | 1.06789(6)  | 0.0164(3)  |
| Fe2  | 0.01267(4) | 0.54253(6)  | 0.28800(7)  | 0.0200(3)  |
| Fe3  | 0.31830(4) | 0.00406(7)  | 0.38846(7)  | 0.0211(3)  |
| Al1  | 0.49675(8) | 0.69348(13) | 0.80071(13) | 0.0176(5)  |
| Al2  | 0.17568(7) | 0.78333(12) | 0.60302(13) | 0.0166(5)  |
| Al06 | 0.16007(8) | 0.26530(15) | 0.50887(15) | 0.0260(6)  |
| C02H | 0.7017(3)  | 0.9667(4)   | 1.1323(5)   | 0.0213(18) |
| C02M | 0.5868(3)  | 0.9214(5)   | 1.0468(5)   | 0.0241(19) |
| C02Q | 0.0271(3)  | 0.4789(6)   | 0.3708(6)   | 0.033(2)   |
| C02U | 0.6733(3)  | 0.9758(5)   | 1.1691(5)   | 0.0236(19) |
| C02Y | -0.0010(3) | 0.6134(5)   | 0.2133(5)   | 0.027(2)   |
| C032 | 0.6196(3)  | 0.9464(5)   | 0.9670(5)   | 0.0231(19) |
| C036 | -0.0191(3) | 0.5525(5)   | 0.1879(5)   | 0.027(2)   |
| C038 | 0.6368(3)  | 0.8892(5)   | 1.0002(5)   | 0.0230(19) |
| C03D | 0.6170(3)  | 0.8727(4)   | 1.0495(5)   | 0.0227(19) |
| C03G | -0.0176(3) | 0.6325(5)   | 0.2659(5)   | 0.029(2)   |
| C03J | 0.6506(3)  | 1.0348(5)   | 1.1451(5)   | 0.025(2)   |
| C03L | 0.3792(3)  | -0.0193(5)  | 0.4047(5)   | 0.025(2)   |
| C03S | 0.0670(3)  | 0.4912(6)   | 0.2993(6)   | 0.035(2)   |
| C03T | 0.7333(3)  | 0.9128(5)   | 1.1409(5)   | 0.029(2)   |
| H03A | 0.738869   | 0.904368    | 1.098393    | 0.044      |
| H03B | 0.723084   | 0.872682    | 1.156323    | 0.044      |
| H03C | 0.758172   | 0.926685    | 1.173478    | 0.044      |
| C03V | 0.3133(3)  | 0.0913(5)   | 0.4387(6)   | 0.034(2)   |
| C03Y | 0.2964(3)  | 0.1001(5)   | 0.3721(6)   | 0.031(2)   |
| C040 | 0.5882(3)  | 0.9664(5)   | 0.9949(4)   | 0.0222(19) |
| C041 | 0.0738(3)  | 0.5461(5)   | 0.3421(5)   | 0.031(2)   |
| C042 | 0.6973(3)  | 1.0196(5)   | 1.0847(5)   | 0.0216(18) |

|      |            |            |           |          |
|------|------------|------------|-----------|----------|
| C043 | 0.6656(3)  | 1.0602(4)  | 1.0928(5) | 0.025(2) |
| C044 | 0.0377(3)  | 0.4491(5)  | 0.3160(5) | 0.031(2) |
| C045 | 0.6693(3)  | 0.8470(5)  | 0.9844(6) | 0.030(2) |
| H04A | 0.656562   | 0.811501   | 0.954406  | 0.046    |
| H04B | 0.686577   | 0.828190   | 1.025434  | 0.046    |
| H04C | 0.685738   | 0.873929   | 0.963211  | 0.046    |
| C046 | 0.6306(3)  | 0.9785(5)  | 0.9098(5) | 0.032(2) |
| H04D | 0.609268   | 0.970287   | 0.868833  | 0.047    |
| H04E | 0.656198   | 0.960341   | 0.905780  | 0.047    |
| H04F | 0.633573   | 1.025901   | 0.917518  | 0.047    |
| C047 | 0.0487(3)  | 0.5391(5)  | 0.3860(5) | 0.030(2) |
| C048 | -0.0462(3) | 0.5328(6)  | 0.2249(5) | 0.031(2) |
| C049 | 0.3603(3)  | -0.0119(5) | 0.3352(5) | 0.028(2) |
| C04G | 0.3592(4)  | -0.0690(6) | 0.4276(6) | 0.039(3) |
| C04H | -0.0454(3) | 0.5831(5)  | 0.2735(5) | 0.028(2) |
| C04K | 0.2640(3)  | 0.0543(6)  | 0.3500(6) | 0.035(2) |
| C04L | 0.6681(3)  | 0.9333(6)  | 1.2242(5) | 0.036(3) |
| H04G | 0.640278   | 0.936838   | 1.227123  | 0.054    |
| H04H | 0.686838   | 0.947544   | 1.266014  | 0.054    |
| H04I | 0.673865   | 0.887611   | 1.215453  | 0.054    |
| C04P | 0.3722(4)  | 0.0322(7)  | 0.2873(6) | 0.043(3) |
| H04J | 0.387718   | 0.007318   | 0.262744  | 0.064    |
| H04K | 0.388906   | 0.068112   | 0.311380  | 0.064    |
| H04L | 0.347926   | 0.050334   | 0.256272  | 0.064    |
| C04Q | 0.6256(3)  | 0.8146(5)  | 1.0946(6) | 0.033(2) |
| H04M | 0.625041   | 0.774661   | 1.068502  | 0.050    |
| H04N | 0.604964   | 0.811629   | 1.118681  | 0.050    |
| H04O | 0.652284   | 0.819514   | 1.126243  | 0.050    |
| C04R | 0.7220(3)  | 1.0284(6)  | 1.0375(6) | 0.033(2) |
| H04P | 0.729660   | 0.985357   | 1.024128  | 0.050    |
| H04Q | 0.746427   | 1.053412   | 1.058910  | 0.050    |
| H04R | 0.706236   | 1.052216   | 0.998398  | 0.050    |
| C04T | 0.3285(3)  | -0.0587(6) | 0.3149(6) | 0.038(3) |
| C04U | 0.5580(3)  | 0.9253(6)  | 1.0889(5) | 0.033(2) |
| H04S | 0.533753   | 0.899651   | 1.068334  | 0.049    |
| H04T | 0.550499   | 0.971191   | 1.092755  | 0.049    |
| H04U | 0.571091   | 0.907734   | 1.132969  | 0.049    |
| C04Z | 0.5603(3)  | 1.0240(6)  | 0.9725(6) | 0.035(2) |
| H04V | 0.573794   | 1.057109   | 0.952399  | 0.053    |
| H04W | 0.553282   | 1.043074   | 1.010716  | 0.053    |
| H04X | 0.535591   | 1.009228   | 0.939934  | 0.053    |
| C050 | 0.1025(3)  | 0.6010(6)  | 0.3429(7) | 0.043(3) |
| H05A | 0.129601   | 0.588392   | 0.369348  | 0.064    |
| H05B | 0.093654   | 0.640052   | 0.362237  | 0.064    |
| H05C | 0.103101   | 0.610720   | 0.297480  | 0.064    |
| C053 | 0.0288(3)  | 0.6534(6)  | 0.1892(6) | 0.040(3) |
| H05D | 0.046234   | 0.624090   | 0.172396  | 0.060    |
| H05E | 0.045325   | 0.679536   | 0.225837  | 0.060    |
| H05F | 0.014133   | 0.682629   | 0.153632  | 0.060    |
| C054 | 0.2616(3)  | 0.0171(5)  | 0.4055(7) | 0.038(3) |
| C056 | 0.6194(3)  | 1.0645(6)  | 1.1727(6) | 0.039(3) |
| H05G | 0.599510   | 1.087777   | 1.137614  | 0.059    |
| H05H | 0.632262   | 1.095425   | 1.207945  | 0.059    |
| H05I | 0.605819   | 1.029924   | 1.190932  | 0.059    |
| C057 | 0.2922(4)  | 0.0390(6)  | 0.4609(6) | 0.045(3) |

|      |            |             |            |           |
|------|------------|-------------|------------|-----------|
| C058 | 0.3287(4)  | -0.0949(6)  | 0.3732(7)  | 0.044(3)  |
| C059 | 0.0227(4)  | 0.3851(6)   | 0.2856(7)  | 0.045(3)  |
| H05J | 0.029907   | 0.380112    | 0.243954   | 0.067     |
| H05K | -0.006776  | 0.383358    | 0.276902   | 0.067     |
| H05L | 0.034985   | 0.349653    | 0.315950   | 0.067     |
| C05C | 0.3095(4)  | 0.1513(6)   | 0.3302(7)  | 0.047(3)  |
| H05M | 0.296689   | 0.142300    | 0.283288   | 0.070     |
| H05N | 0.338935   | 0.149881    | 0.338728   | 0.070     |
| H05O | 0.301317   | 0.194824    | 0.341467   | 0.070     |
| C05F | 0.6517(3)  | 1.1237(5)   | 1.0564(6)  | 0.036(2)  |
| H05P | 0.651827   | 1.119049    | 1.010043   | 0.053     |
| H05Q | 0.670053   | 1.159203    | 1.077060   | 0.053     |
| H05R | 0.624269   | 1.133966    | 1.058459   | 0.053     |
| C05H | 0.0876(4)  | 0.4776(7)   | 0.2464(7)  | 0.045(3)  |
| H05S | 0.067257   | 0.467001    | 0.204851   | 0.067     |
| H05T | 0.106112   | 0.440441    | 0.259726   | 0.067     |
| H05U | 0.102844   | 0.516419    | 0.239920   | 0.067     |
| C05J | -0.0113(4) | 0.5145(6)   | 0.1312(6)  | 0.040(3)  |
| H05V | -0.034218  | 0.519786    | 0.091811   | 0.060     |
| H05W | -0.007857  | 0.467947    | 0.143034   | 0.060     |
| H05X | 0.013341   | 0.531014    | 0.121968   | 0.060     |
| C05N | -0.0007(4) | 0.4521(7)   | 0.4075(6)  | 0.045(3)  |
| H05Y | -0.009293  | 0.487556    | 0.432024   | 0.067     |
| H05Z | 0.013351   | 0.418319    | 0.438524   | 0.067     |
| H010 | -0.024433  | 0.432872    | 0.376057   | 0.067     |
| C05P | -0.0706(4) | 0.5836(7)   | 0.3219(7)  | 0.048(3)  |
| H011 | -0.097047  | 0.603192    | 0.300842   | 0.072     |
| H012 | -0.056848  | 0.609334    | 0.360934   | 0.072     |
| H013 | -0.074377  | 0.538515    | 0.335286   | 0.072     |
| C05R | 0.4143(3)  | 0.0213(7)   | 0.4437(6)  | 0.041(3)  |
| H014 | 0.439484   | -0.003141   | 0.448877   | 0.062     |
| H015 | 0.410786   | 0.031157    | 0.487371   | 0.062     |
| H016 | 0.415453   | 0.062390    | 0.420030   | 0.062     |
| C05S | -0.0719(4) | 0.4730(6)   | 0.2136(6)  | 0.043(3)  |
| H017 | -0.098379  | 0.483285    | 0.183269   | 0.065     |
| H018 | -0.075424  | 0.457727    | 0.255897   | 0.065     |
| H019 | -0.058871  | 0.438552    | 0.194306   | 0.065     |
| C05U | 0.3471(5)  | 0.1316(7)   | 0.4821(8)  | 0.062(4)  |
| H01A | 0.369211   | 0.134994    | 0.461325   | 0.093     |
| H01B | 0.356942   | 0.110377    | 0.525438   | 0.093     |
| H01C | 0.337037   | 0.175533    | 0.487833   | 0.093     |
| C05W | -0.0083(4) | 0.6952(6)   | 0.3049(7)  | 0.049(3)  |
| H01D | 0.016847   | 0.714062    | 0.299661   | 0.073     |
| H01E | -0.005206  | 0.686077    | 0.351776   | 0.073     |
| H01F | -0.030473  | 0.726425    | 0.288569   | 0.073     |
| C05X | 0.0479(5)  | 0.5858(7)   | 0.4427(6)  | 0.053(3)  |
| H01G | 0.058444   | 0.628711    | 0.434693   | 0.079     |
| H01H | 0.064628   | 0.567891    | 0.484597   | 0.079     |
| H01I | 0.019994   | 0.590732    | 0.445182   | 0.079     |
| C05Y | 0.3015(4)  | -0.0693(10) | 0.2465(8)  | 0.069(5)  |
| H01J | 0.290752   | -0.027099   | 0.227224   | 0.103     |
| H01K | 0.279030   | -0.098128   | 0.248513   | 0.103     |
| H01L | 0.316942   | -0.089773   | 0.219063   | 0.103     |
| C05Z | 0.2306(5)  | -0.0354(8)  | 0.4078(15) | 0.109(10) |
| H01M | 0.208213   | -0.015615   | 0.421370   | 0.163     |

|      |             |             |            |            |
|------|-------------|-------------|------------|------------|
| H01N | 0.243410    | -0.069384   | 0.439757   | 0.163      |
| H01O | 0.220295    | -0.055148   | 0.363879   | 0.163      |
| C065 | 0.3715(5)   | -0.0937(10) | 0.5003(8)  | 0.078(6)   |
| H06A | 0.347129    | -0.103849   | 0.513882   | 0.118      |
| H06B | 0.387034    | -0.059581   | 0.529191   | 0.118      |
| H06C | 0.388076    | -0.133307   | 0.503643   | 0.118      |
| C067 | 0.2374(6)   | 0.0516(8)   | 0.2818(8)  | 0.075(6)   |
| H06D | 0.253612    | 0.057220    | 0.250540   | 0.113      |
| H06E | 0.217260    | 0.086714    | 0.275389   | 0.113      |
| H06F | 0.223657    | 0.009042    | 0.274265   | 0.113      |
| C06A | 0.3003(5)   | -0.1526(7)  | 0.3729(10) | 0.069(5)   |
| H06G | 0.272788    | -0.136208   | 0.367009   | 0.104      |
| H06H | 0.309270    | -0.176199   | 0.415021   | 0.104      |
| H06I | 0.300701    | -0.182338   | 0.336463   | 0.104      |
| C06G | 0.3013(7)   | 0.0159(9)   | 0.5319(8)  | 0.087(7)   |
| H06J | 0.300342    | -0.032114   | 0.532846   | 0.130      |
| H06K | 0.281129    | 0.033878    | 0.552136   | 0.130      |
| H06L | 0.328265    | 0.030935    | 0.556561   | 0.130      |
| O1_2 | 0.4834(6)   | 0.7286(10)  | 0.8670(6)  | 0.025(3)   |
| C1_2 | 0.4887(3)   | 0.7284(5)   | 0.9338(7)  | 0.028(3)   |
| C2_2 | 0.5284(4)   | 0.6929(6)   | 0.9703(7)  | 0.037(3)   |
| F1_2 | 0.5582(4)   | 0.7093(7)   | 0.9439(10) | 0.047(3)   |
| F2_2 | 0.5404(8)   | 0.7098(11)  | 1.0341(6)  | 0.052(3)   |
| F3_2 | 0.5242(4)   | 0.6278(5)   | 0.9669(6)  | 0.056(3)   |
| C3_2 | 0.4528(4)   | 0.6936(6)   | 0.9510(7)  | 0.041(3)   |
| F4_2 | 0.4200(3)   | 0.7318(6)   | 0.9348(6)  | 0.054(3)   |
| F5_2 | 0.4435(5)   | 0.6384(9)   | 0.9157(11) | 0.053(3)   |
| F6_2 | 0.4602(7)   | 0.6799(10)  | 1.0153(7)  | 0.053(4)   |
| C4_2 | 0.4901(4)   | 0.8010(6)   | 0.9569(7)  | 0.040(3)   |
| F7_2 | 0.4615(4)   | 0.8358(6)   | 0.9137(8)  | 0.053(3)   |
| F8_2 | 0.4836(7)   | 0.8082(11)  | 1.0157(7)  | 0.053(4)   |
| F9_2 | 0.5257(3)   | 0.8277(6)   | 0.9574(6)  | 0.053(3)   |
| O1_3 | 0.54290(17) | 0.7189(3)   | 0.7925(3)  | 0.0202(13) |
| C1_3 | 0.5641(2)   | 0.7676(3)   | 0.7732(4)  | 0.0190(15) |
| C2_3 | 0.5573(2)   | 0.8338(4)   | 0.8047(4)  | 0.0215(16) |
| F1_3 | 0.57741(17) | 0.8359(3)   | 0.8694(3)  | 0.0276(12) |
| F2_3 | 0.56916(17) | 0.8852(3)   | 0.7755(3)  | 0.0272(12) |
| F3_3 | 0.51836(15) | 0.8427(3)   | 0.8001(3)  | 0.0258(12) |
| C3_3 | 0.5514(2)   | 0.7745(4)   | 0.6961(4)  | 0.0226(16) |
| F4_3 | 0.54632(17) | 0.7153(3)   | 0.6679(3)  | 0.0291(12) |
| F5_3 | 0.51687(16) | 0.8068(3)   | 0.6748(3)  | 0.0281(12) |
| F6_3 | 0.57966(17) | 0.8061(3)   | 0.6747(3)  | 0.0294(12) |
| C4_3 | 0.6099(2)   | 0.7496(4)   | 0.7975(4)  | 0.0228(16) |
| F7_3 | 0.61883(16) | 0.7037(3)   | 0.7588(3)  | 0.0304(13) |
| F8_3 | 0.63377(16) | 0.8012(3)   | 0.7976(3)  | 0.0303(13) |
| F9_3 | 0.61928(16) | 0.7258(3)   | 0.8592(3)  | 0.0276(12) |
| O1_4 | 0.50091(18) | 0.6095(3)   | 0.8128(3)  | 0.0212(13) |
| C1_4 | 0.5160(2)   | 0.5524(3)   | 0.7964(4)  | 0.0187(15) |
| C2_4 | 0.5037(2)   | 0.4971(4)   | 0.8378(4)  | 0.0259(17) |
| F1_4 | 0.5264(2)   | 0.5002(3)   | 0.9007(3)  | 0.0397(15) |
| F2_4 | 0.5083(2)   | 0.4375(3)   | 0.8148(3)  | 0.0365(14) |
| F3_4 | 0.46542(16) | 0.5037(3)   | 0.8379(3)  | 0.0332(13) |
| C3_4 | 0.4977(2)   | 0.5376(4)   | 0.7217(4)  | 0.0242(17) |
| F4_4 | 0.49926(19) | 0.5909(3)   | 0.6855(3)  | 0.0305(13) |
| F5_4 | 0.45911(17) | 0.5200(3)   | 0.7090(3)  | 0.0335(13) |



|      |             |            |            |            |
|------|-------------|------------|------------|------------|
| F6_4 | 0.5171(2)   | 0.4900(3)  | 0.6995(3)  | 0.0361(14) |
| C4_4 | 0.5629(2)   | 0.5542(4)  | 0.8124(4)  | 0.0286(18) |
| F7_4 | 0.57474(18) | 0.5860(3)  | 0.7660(3)  | 0.0341(13) |
| F8_4 | 0.5791(2)   | 0.4948(3)  | 0.8168(4)  | 0.0436(16) |
| F9_4 | 0.57874(17) | 0.5856(3)  | 0.8691(3)  | 0.0369(14) |
| O1_1 | 0.4592(3)   | 0.7169(8)  | 0.7313(5)  | 0.023(2)   |
| C1_1 | 0.4200(3)   | 0.7322(5)  | 0.7029(5)  | 0.023(2)   |
| C2_1 | 0.4155(3)   | 0.8077(5)  | 0.6927(5)  | 0.034(2)   |
| F1_1 | 0.4360(3)   | 0.8383(5)  | 0.7475(5)  | 0.048(3)   |
| F2_1 | 0.3771(3)   | 0.8270(5)  | 0.6770(7)  | 0.042(3)   |
| F3_1 | 0.4307(3)   | 0.8260(5)  | 0.6437(5)  | 0.049(2)   |
| C3_1 | 0.4076(3)   | 0.6989(5)  | 0.6341(5)  | 0.035(3)   |
| F4_1 | 0.4021(3)   | 0.6345(4)  | 0.6411(6)  | 0.056(3)   |
| F5_1 | 0.4365(4)   | 0.7052(6)  | 0.6029(6)  | 0.049(3)   |
| F6_1 | 0.3734(3)   | 0.7233(9)  | 0.5948(7)  | 0.047(3)   |
| C4_1 | 0.3924(3)   | 0.7095(6)  | 0.7460(5)  | 0.036(3)   |
| F7_1 | 0.4048(5)   | 0.6498(7)  | 0.7706(7)  | 0.060(3)   |
| F8_1 | 0.3538(2)   | 0.7032(6)  | 0.7103(5)  | 0.046(3)   |
| F9_1 | 0.3945(3)   | 0.7498(6)  | 0.7965(5)  | 0.054(3)   |
| O1_5 | 0.19985(18) | 0.7518(3)  | 0.5477(3)  | 0.0257(14) |
| C1_5 | 0.2348(2)   | 0.7316(4)  | 0.5365(4)  | 0.0280(17) |
| C2_5 | 0.2271(3)   | 0.7158(4)  | 0.4618(4)  | 0.035(2)   |
| F1_5 | 0.1932(2)   | 0.6805(4)  | 0.4396(4)  | 0.055(2)   |
| F2_5 | 0.2575(2)   | 0.6834(4)  | 0.4489(4)  | 0.0514(18) |
| F3_5 | 0.2222(3)   | 0.7710(4)  | 0.4262(4)  | 0.057(2)   |
| C3_5 | 0.2676(3)   | 0.7866(4)  | 0.5548(5)  | 0.037(2)   |
| F4_5 | 0.2839(2)   | 0.7911(4)  | 0.6201(3)  | 0.0503(18) |
| F5_5 | 0.2502(2)   | 0.8449(3)  | 0.5336(4)  | 0.056(2)   |
| F6_5 | 0.2973(2)   | 0.7774(4)  | 0.5272(4)  | 0.057(2)   |
| C4_5 | 0.2512(3)   | 0.6704(4)  | 0.5790(4)  | 0.036(2)   |
| F7_5 | 0.2497(2)   | 0.6794(3)  | 0.6410(3)  | 0.0400(15) |
| F8_5 | 0.2893(2)   | 0.6564(4)  | 0.5805(4)  | 0.0471(17) |
| F9_5 | 0.2293(2)   | 0.6176(3)  | 0.5544(4)  | 0.0520(18) |
| O1_6 | 0.2061(5)   | 0.8438(8)  | 0.6465(8)  | 0.029(3)   |
| C1_6 | 0.2167(4)   | 0.8812(6)  | 0.7019(6)  | 0.031(3)   |
| C2_6 | 0.1799(4)   | 0.9213(6)  | 0.7104(7)  | 0.040(3)   |
| F1_6 | 0.1716(5)   | 0.9710(6)  | 0.6669(7)  | 0.058(3)   |
| F2_6 | 0.1861(8)   | 0.9465(8)  | 0.7705(8)  | 0.066(4)   |
| F3_6 | 0.1472(4)   | 0.8824(12) | 0.6983(12) | 0.057(3)   |
| C3_6 | 0.2336(4)   | 0.8390(7)  | 0.7647(7)  | 0.047(3)   |
| F4_6 | 0.2568(7)   | 0.7896(8)  | 0.7538(15) | 0.068(3)   |
| F5_6 | 0.2041(4)   | 0.8113(8)  | 0.7847(7)  | 0.063(4)   |
| F6_6 | 0.2557(7)   | 0.8749(14) | 0.8148(8)  | 0.075(4)   |
| C4_6 | 0.2495(3)   | 0.9295(6)  | 0.6932(6)  | 0.037(3)   |
| F7_6 | 0.2865(3)   | 0.9038(7)  | 0.7083(7)  | 0.059(3)   |
| F8_6 | 0.2518(7)   | 0.9830(9)  | 0.7311(10) | 0.059(4)   |
| F9_6 | 0.2398(5)   | 0.9503(12) | 0.6307(7)  | 0.046(3)   |
| O1_7 | 0.1668(5)   | 0.7256(7)  | 0.6573(7)  | 0.025(3)   |
| C1_7 | 0.1428(3)   | 0.6787(5)  | 0.6706(5)  | 0.027(2)   |
| C2_7 | 0.1154(3)   | 0.6473(5)  | 0.6064(6)  | 0.039(3)   |
| F1_7 | 0.0828(3)   | 0.6842(6)  | 0.5827(7)  | 0.062(3)   |
| F2_7 | 0.1033(4)   | 0.5870(5)  | 0.6146(7)  | 0.053(3)   |
| F3_7 | 0.1352(6)   | 0.6459(9)  | 0.5594(7)  | 0.065(3)   |
| C3_7 | 0.1711(3)   | 0.6246(6)  | 0.7105(6)  | 0.047(3)   |
| F4_7 | 0.2010(4)   | 0.6522(9)  | 0.7577(9)  | 0.069(3)   |

|       |             |            |            |            |
|-------|-------------|------------|------------|------------|
| F5_7  | 0.1883(4)   | 0.5911(7)  | 0.6707(7)  | 0.069(4)   |
| F6_7  | 0.1524(3)   | 0.5818(6)  | 0.7390(7)  | 0.061(3)   |
| C4_7  | 0.1162(4)   | 0.7069(6)  | 0.7133(6)  | 0.052(3)   |
| F7_7  | 0.1379(4)   | 0.7156(8)  | 0.7760(5)  | 0.083(4)   |
| F8_7  | 0.0852(4)   | 0.6678(6)  | 0.7119(7)  | 0.062(4)   |
| F9_7  | 0.1015(4)   | 0.7648(5)  | 0.6863(8)  | 0.071(4)   |
| O1_8  | 0.1295(4)   | 0.8109(10) | 0.5543(8)  | 0.031(4)   |
| C1_8  | 0.1086(3)   | 0.8435(6)  | 0.4985(6)  | 0.035(3)   |
| C2_8  | 0.1219(5)   | 0.9164(6)  | 0.5039(7)  | 0.052(3)   |
| F1_8  | 0.1061(5)   | 0.9469(7)  | 0.5477(7)  | 0.089(5)   |
| F2_8  | 0.1100(8)   | 0.9486(10) | 0.4462(10) | 0.069(4)   |
| F3_8  | 0.1620(5)   | 0.9193(11) | 0.5214(11) | 0.076(4)   |
| C3_8  | 0.1161(4)   | 0.8130(6)  | 0.4346(6)  | 0.051(3)   |
| F4_8  | 0.1166(5)   | 0.7471(6)  | 0.4407(7)  | 0.065(4)   |
| F5_8  | 0.1511(4)   | 0.8340(8)  | 0.4269(7)  | 0.068(4)   |
| F6_8  | 0.0860(4)   | 0.8275(7)  | 0.3811(6)  | 0.067(4)   |
| C4_8  | 0.0631(4)   | 0.8367(7)  | 0.4940(7)  | 0.054(3)   |
| F7_8  | 0.0506(4)   | 0.7773(6)  | 0.4691(9)  | 0.071(4)   |
| F8_8  | 0.0411(4)   | 0.8813(7)  | 0.4533(7)  | 0.064(4)   |
| F9_8  | 0.0573(6)   | 0.8455(11) | 0.5533(8)  | 0.074(4)   |
| O1_9  | 0.1610(3)   | 0.3512(4)  | 0.5012(5)  | 0.0238(19) |
| C1_9  | 0.1706(3)   | 0.4087(4)  | 0.5343(4)  | 0.022(2)   |
| C2_9  | 0.2165(3)   | 0.4122(5)  | 0.5702(5)  | 0.030(2)   |
| F1_9  | 0.2253(3)   | 0.3787(4)  | 0.6265(4)  | 0.038(2)   |
| F2_9  | 0.2289(3)   | 0.4744(4)  | 0.5858(5)  | 0.047(2)   |
| F3_9  | 0.2383(3)   | 0.3883(5)  | 0.5317(6)  | 0.039(2)   |
| C3_9  | 0.1595(3)   | 0.4651(5)  | 0.4825(5)  | 0.036(2)   |
| F4_9  | 0.1239(2)   | 0.4524(4)  | 0.4386(5)  | 0.046(2)   |
| F5_9  | 0.1867(3)   | 0.4717(5)  | 0.4488(5)  | 0.044(2)   |
| F6_9  | 0.1566(3)   | 0.5224(4)  | 0.5099(5)  | 0.051(2)   |
| C4_9  | 0.1466(3)   | 0.4167(5)  | 0.5866(5)  | 0.032(2)   |
| F7_9  | 0.1080(3)   | 0.4317(5)  | 0.5576(5)  | 0.044(2)   |
| F8_9  | 0.1612(3)   | 0.4630(4)  | 0.6310(5)  | 0.049(2)   |
| F9_9  | 0.1469(3)   | 0.3610(4)  | 0.6198(5)  | 0.039(2)   |
| O1_11 | 0.1210(2)   | 0.2368(4)  | 0.5369(4)  | 0.0338(16) |
| C1_11 | 0.0818(2)   | 0.2182(4)  | 0.5245(4)  | 0.037(2)   |
| C2_11 | 0.0743(3)   | 0.2004(5)  | 0.5916(5)  | 0.043(2)   |
| F1_11 | 0.0908(2)   | 0.2439(4)  | 0.6380(3)  | 0.0505(18) |
| F2_11 | 0.0347(2)   | 0.1978(4)  | 0.5881(5)  | 0.061(2)   |
| F3_11 | 0.0907(3)   | 0.1417(4)  | 0.6135(5)  | 0.067(2)   |
| C3_11 | 0.0726(3)   | 0.1584(5)  | 0.4765(5)  | 0.053(3)   |
| F4_11 | 0.0682(2)   | 0.1764(5)  | 0.4141(4)  | 0.066(2)   |
| F5_11 | 0.1028(2)   | 0.1155(4)  | 0.4937(5)  | 0.071(3)   |
| F6_11 | 0.0391(2)   | 0.1275(5)  | 0.4802(5)  | 0.075(3)   |
| C4_11 | 0.0539(3)   | 0.2757(4)  | 0.4915(5)  | 0.039(2)   |
| F7_11 | 0.0675(2)   | 0.3046(4)  | 0.4455(4)  | 0.0548(19) |
| F8_11 | 0.01608(19) | 0.2561(5)  | 0.4628(4)  | 0.063(2)   |
| F9_11 | 0.0522(2)   | 0.3208(4)  | 0.5373(4)  | 0.0497(18) |
| O1_13 | 0.4859(11)  | 0.7236(17) | 0.8713(10) | 0.023(5)   |
| C1_13 | 0.4920(5)   | 0.7214(8)  | 0.9381(10) | 0.026(3)   |
| C2_13 | 0.5380(5)   | 0.7242(9)  | 0.9740(10) | 0.034(4)   |
| F1_13 | 0.5517(6)   | 0.7851(9)  | 0.9713(10) | 0.051(5)   |
| F2_13 | 0.5459(13)  | 0.7070(19) | 1.0374(11) | 0.048(4)   |
| F3_13 | 0.5578(8)   | 0.6832(12) | 0.9446(17) | 0.044(5)   |
| C3_13 | 0.4744(6)   | 0.6573(8)  | 0.9586(10) | 0.035(4)   |

|       |            |            |            |          |
|-------|------------|------------|------------|----------|
| F4_13 | 0.4388(8)  | 0.6441(16) | 0.915(2)   | 0.053(5) |
| F5_13 | 0.4989(7)  | 0.6062(9)  | 0.9599(10) | 0.048(4) |
| F6_13 | 0.4680(12) | 0.6619(17) | 1.0182(12) | 0.048(5) |
| C4_13 | 0.4711(5)  | 0.7815(9)  | 0.9597(10) | 0.040(4) |
| F7_13 | 0.4315(5)  | 0.7718(12) | 0.9481(12) | 0.060(4) |
| F8_13 | 0.4861(11) | 0.794(2)   | 1.0241(10) | 0.051(5) |
| F9_13 | 0.4771(8)  | 0.8356(10) | 0.9278(14) | 0.047(4) |
| O1_14 | 0.4597(8)  | 0.714(2)   | 0.7291(14) | 0.026(7) |
| C1_14 | 0.4205(7)  | 0.7263(10) | 0.6973(10) | 0.029(4) |
| C2_14 | 0.4061(7)  | 0.7912(11) | 0.7218(12) | 0.036(4) |
| F1_14 | 0.4328(10) | 0.8386(14) | 0.7225(18) | 0.042(4) |
| F2_14 | 0.3706(8)  | 0.8110(17) | 0.682(2)   | 0.043(6) |
| F3_14 | 0.4009(10) | 0.7831(17) | 0.7817(13) | 0.057(5) |
| C3_14 | 0.3935(8)  | 0.6689(11) | 0.7090(13) | 0.045(5) |
| F4_14 | 0.3986(11) | 0.6176(13) | 0.6731(19) | 0.063(6) |
| F5_14 | 0.4022(17) | 0.652(2)   | 0.7722(15) | 0.059(5) |
| F6_14 | 0.3546(7)  | 0.6860(19) | 0.687(2)   | 0.051(6) |
| C4_14 | 0.4151(7)  | 0.7304(13) | 0.6214(10) | 0.042(5) |
| F7_14 | 0.4335(14) | 0.6791(16) | 0.6029(19) | 0.052(5) |
| F8_14 | 0.3761(9)  | 0.728(3)   | 0.587(2)   | 0.050(5) |
| F9_14 | 0.4305(8)  | 0.7856(14) | 0.6053(15) | 0.058(7) |
| O1_15 | 0.2080(9)  | 0.8378(15) | 0.6526(15) | 0.038(7) |
| C1_15 | 0.2175(5)  | 0.8769(9)  | 0.7068(10) | 0.035(4) |
| C2_15 | 0.2257(6)  | 0.9479(9)  | 0.6865(10) | 0.041(4) |
| F1_15 | 0.1915(6)  | 0.9796(10) | 0.6597(12) | 0.052(4) |
| F2_15 | 0.2465(12) | 0.9821(16) | 0.7391(18) | 0.061(6) |
| F3_15 | 0.2478(9)  | 0.947(2)   | 0.6436(15) | 0.042(4) |
| C3_15 | 0.2565(6)  | 0.8491(11) | 0.7557(11) | 0.052(4) |
| F4_15 | 0.2557(12) | 0.7837(12) | 0.758(3)   | 0.067(5) |
| F5_15 | 0.2884(6)  | 0.8677(14) | 0.7358(12) | 0.064(4) |
| F6_15 | 0.2612(12) | 0.872(3)   | 0.8167(13) | 0.073(5) |
| C4_15 | 0.1829(6)  | 0.8784(10) | 0.7411(11) | 0.048(4) |
| F7_15 | 0.1825(8)  | 0.8238(11) | 0.7762(12) | 0.059(5) |
| F8_15 | 0.1871(15) | 0.9290(13) | 0.7830(17) | 0.066(5) |
| F9_15 | 0.1467(7)  | 0.882(2)   | 0.697(2)   | 0.058(4) |
| O1_16 | 0.1297(7)  | 0.8133(19) | 0.5568(15) | 0.029(6) |
| C1_16 | 0.1075(5)  | 0.8479(10) | 0.5038(9)  | 0.036(4) |
| C2_16 | 0.0736(6)  | 0.8843(11) | 0.5254(10) | 0.049(5) |
| F1_16 | 0.0898(10) | 0.9253(15) | 0.5751(14) | 0.096(6) |
| F2_16 | 0.0502(8)  | 0.9173(15) | 0.4753(13) | 0.070(6) |
| F3_16 | 0.0504(12) | 0.8416(18) | 0.546(2)   | 0.073(5) |
| C3_16 | 0.0884(7)  | 0.8011(10) | 0.4451(10) | 0.055(5) |
| F4_16 | 0.1176(9)  | 0.7674(15) | 0.4288(16) | 0.064(4) |
| F5_16 | 0.0631(9)  | 0.7586(14) | 0.4600(18) | 0.080(6) |
| F6_16 | 0.0672(9)  | 0.8343(15) | 0.3920(12) | 0.072(6) |
| C4_16 | 0.1347(7)  | 0.8976(12) | 0.4801(12) | 0.045(4) |
| F7_16 | 0.1567(9)  | 0.8671(16) | 0.4457(16) | 0.072(5) |
| F8_16 | 0.1133(15) | 0.943(2)   | 0.439(2)   | 0.068(5) |
| F9_16 | 0.1586(12) | 0.929(2)   | 0.531(2)   | 0.074(6) |
| O1_17 | 0.1627(12) | 0.7292(18) | 0.6560(17) | 0.029(7) |
| C1_17 | 0.1413(6)  | 0.6801(10) | 0.6729(10) | 0.031(4) |
| C2_17 | 0.1620(7)  | 0.6613(12) | 0.7462(10) | 0.045(5) |
| F1_17 | 0.1610(14) | 0.7110(16) | 0.7871(16) | 0.090(6) |
| F2_17 | 0.1443(9)  | 0.6106(14) | 0.7661(16) | 0.059(6) |
| F3_17 | 0.2007(7)  | 0.646(3)   | 0.754(2)   | 0.066(5) |

|       |            |            |            |            |
|-------|------------|------------|------------|------------|
| C3_17 | 0.1423(8)  | 0.6189(13) | 0.6292(13) | 0.050(5)   |
| F4_17 | 0.1352(17) | 0.634(3)   | 0.5653(13) | 0.069(5)   |
| F5_17 | 0.1788(9)  | 0.591(2)   | 0.647(2)   | 0.071(6)   |
| F6_17 | 0.1146(10) | 0.5757(15) | 0.635(2)   | 0.058(6)   |
| C4_17 | 0.0970(7)  | 0.7014(12) | 0.6655(13) | 0.048(5)   |
| F7_17 | 0.0768(9)  | 0.7137(18) | 0.6034(14) | 0.070(6)   |
| F8_17 | 0.0769(11) | 0.6541(17) | 0.687(2)   | 0.067(6)   |
| F9_17 | 0.0965(12) | 0.7555(15) | 0.701(2)   | 0.076(6)   |
| O1_18 | 0.2009(10) | 0.2403(18) | 0.5780(16) | 0.039(8)   |
| C1_18 | 0.2262(6)  | 0.2053(10) | 0.6264(12) | 0.044(4)   |
| C2_18 | 0.2704(7)  | 0.2301(12) | 0.6409(13) | 0.062(5)   |
| F1_18 | 0.2744(7)  | 0.2859(13) | 0.6746(17) | 0.061(7)   |
| F2_18 | 0.2953(9)  | 0.1866(17) | 0.6788(19) | 0.063(6)   |
| F3_18 | 0.2804(12) | 0.238(2)   | 0.5845(16) | 0.062(5)   |
| C3_18 | 0.2257(8)  | 0.1317(11) | 0.6067(14) | 0.062(6)   |
| F4_18 | 0.1881(8)  | 0.1109(16) | 0.580(2)   | 0.069(5)   |
| F5_18 | 0.2465(12) | 0.1258(17) | 0.5620(19) | 0.087(10)  |
| F6_18 | 0.2412(11) | 0.0956(15) | 0.6607(17) | 0.073(6)   |
| C4_18 | 0.2109(8)  | 0.2111(14) | 0.6892(13) | 0.070(5)   |
| F7_18 | 0.1809(10) | 0.168(2)   | 0.682(2)   | 0.109(12)  |
| F8_18 | 0.2394(11) | 0.200(2)   | 0.7451(14) | 0.084(6)   |
| F9_18 | 0.1976(13) | 0.2720(16) | 0.6921(19) | 0.080(6)   |
| O1_20 | 0.1527(13) | 0.3368(13) | 0.507(2)   | 0.034(7)   |
| C1_20 | 0.1594(7)  | 0.4017(12) | 0.5199(11) | 0.032(4)   |
| C2_20 | 0.1324(9)  | 0.4233(14) | 0.5649(14) | 0.045(4)   |
| F1_20 | 0.1330(13) | 0.3782(19) | 0.6109(18) | 0.049(5)   |
| F2_20 | 0.1448(13) | 0.4802(16) | 0.595(2)   | 0.057(5)   |
| F3_20 | 0.0945(9)  | 0.430(2)   | 0.527(2)   | 0.051(5)   |
| C3_20 | 0.1472(8)  | 0.4430(14) | 0.4554(13) | 0.048(4)   |
| F4_20 | 0.1767(10) | 0.446(2)   | 0.4259(18) | 0.054(5)   |
| F5_20 | 0.1152(9)  | 0.4177(18) | 0.4111(16) | 0.053(5)   |
| F6_20 | 0.1378(13) | 0.5044(14) | 0.469(2)   | 0.067(10)  |
| C4_20 | 0.2044(7)  | 0.4139(14) | 0.5568(14) | 0.037(5)   |
| F7_20 | 0.2285(11) | 0.377(2)   | 0.531(3)   | 0.045(5)   |
| F8_20 | 0.2151(12) | 0.4767(15) | 0.554(2)   | 0.052(5)   |
| F9_20 | 0.2113(12) | 0.398(2)   | 0.6205(14) | 0.045(5)   |
| O1_10 | 0.2054(3)  | 0.2444(5)  | 0.5616(5)  | 0.020(2)   |
| C1_10 | 0.2263(3)  | 0.1992(5)  | 0.6041(5)  | 0.029(2)   |
| C2_10 | 0.2705(3)  | 0.1998(6)  | 0.6003(6)  | 0.040(3)   |
| F1_10 | 0.2724(4)  | 0.1717(7)  | 0.5438(5)  | 0.080(4)   |
| F2_10 | 0.2960(3)  | 0.1682(6)  | 0.6495(5)  | 0.052(3)   |
| F3_10 | 0.2833(4)  | 0.2616(5)  | 0.6006(7)  | 0.064(3)   |
| C3_10 | 0.2249(4)  | 0.2146(6)  | 0.6754(5)  | 0.052(3)   |
| F4_10 | 0.1886(3)  | 0.2337(6)  | 0.6767(5)  | 0.067(3)   |
| F5_10 | 0.2497(4)  | 0.2640(6)  | 0.7006(5)  | 0.078(4)   |
| F6_10 | 0.2365(4)  | 0.1624(6)  | 0.7156(5)  | 0.068(3)   |
| C4_10 | 0.2087(4)  | 0.1293(5)  | 0.5852(6)  | 0.055(3)   |
| F7_10 | 0.1764(3)  | 0.1204(6)  | 0.6087(7)  | 0.069(3)   |
| F8_10 | 0.2356(3)  | 0.0835(5)  | 0.6124(7)  | 0.067(3)   |
| F9_10 | 0.1968(4)  | 0.1203(5)  | 0.5198(5)  | 0.082(4)   |
| O1_12 | 0.1537(2)  | 0.2356(4)  | 0.4290(4)  | 0.0379(18) |
| C1_12 | 0.1634(3)  | 0.2428(5)  | 0.3698(4)  | 0.043(2)   |
| C2_12 | 0.1414(3)  | 0.1879(5)  | 0.3221(5)  | 0.058(3)   |
| F1_12 | 0.1440(4)  | 0.1309(4)  | 0.3545(5)  | 0.085(3)   |
| F2_12 | 0.1569(3)  | 0.1800(5)  | 0.2713(4)  | 0.074(3)   |

|       |           |           |           |            |
|-------|-----------|-----------|-----------|------------|
| F3_12 | 0.1023(2) | 0.2042(5) | 0.2985(4) | 0.074(3)   |
| C3_12 | 0.1499(3) | 0.3100(5) | 0.3367(5) | 0.046(2)   |
| F4_12 | 0.1755(3) | 0.3581(4) | 0.3646(4) | 0.067(2)   |
| F5_12 | 0.1135(2) | 0.3258(5) | 0.3431(4) | 0.069(2)   |
| F6_12 | 0.1469(3) | 0.3106(5) | 0.2716(4) | 0.069(2)   |
| C4_12 | 0.2099(3) | 0.2371(5) | 0.3822(5) | 0.047(2)   |
| F7_12 | 0.2284(2) | 0.2728(4) | 0.4350(3) | 0.0489(18) |
| F8_12 | 0.2222(2) | 0.2551(5) | 0.3303(4) | 0.067(2)   |
| F9_12 | 0.2216(3) | 0.1755(4) | 0.3951(5) | 0.080(3)   |

## S-4 Quantum chemical calculations

Table S 20 SCF energy, FreeH energy and FreeH entropy of presented compounds. (BP86/def-SV(P)/D3(BJ) )

| Compound                                                                        | SCF /Hartree    | FreeH energy<br>[kJ/mol] | FreeH entropy<br>[kJ/mol K] |
|---------------------------------------------------------------------------------|-----------------|--------------------------|-----------------------------|
| [“phenazine <sup>F</sup> ”] <sup>+</sup> <b>4</b> <sup>+</sup>                  | -2818.934205143 | 626.31                   | 0.99143                     |
| [Sn(CHpz <sub>3</sub> ) <sub>2</sub> ] <sup>2+</sup> <b>6</b> <sup>2+</sup>     | -1433.226540258 | 1120.23                  | 0.81621                     |
| [Fe(CO)Cp* <sub>2</sub> ] <sup>2+</sup> <b>7</b> <sup>2+</sup>                  | -2156.281777383 | 1234.54                  | 0.72132                     |
| [Fe(CN- <sup>t</sup> Bu)Cp* <sub>2</sub> ] <sup>2+</sup> <b>8</b> <sup>2+</sup> | -2293.574034725 | 1568.33                  | 0.83216                     |

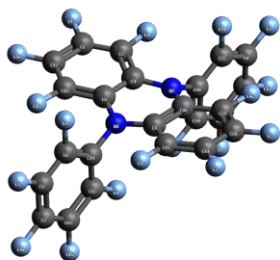

Atomic coordinates of 4<sup>+</sup>

|   |            |            |            |
|---|------------|------------|------------|
| F | 1.7130645  | 3.9362931  | -0.3476610 |
| F | 0.6529156  | -6.1481980 | -1.1189093 |
| F | 2.9897374  | 0.8245089  | 4.0435074  |
| F | -0.1081757 | -2.3308300 | -3.0339109 |
| F | 0.5194270  | 6.2310754  | 0.5853027  |
| F | 2.9920574  | -1.8732722 | 3.6725205  |
| F | -2.0192510 | -1.6598090 | 0.5352365  |
| F | 1.8869580  | 2.4602759  | 2.2360497  |
| F | -1.9308159 | 1.3756416  | 1.2523883  |
| F | -1.8913803 | 6.0787153  | 1.8514531  |
| F | -3.2406823 | -4.1272778 | 0.6895670  |
| F | -1.0202114 | 2.0157676  | -4.5640157 |
| F | -0.9446171 | -0.6765502 | -4.9648406 |
| F | 1.8595368  | -3.6826415 | -1.2701916 |
| F | -3.1364329 | 3.6697105  | 2.1941383  |
| F | 1.8705029  | -2.9679336 | 1.5091163  |
| F | -1.8867622 | -6.3501408 | -0.1451176 |
| F | -0.2883637 | 3.0833190  | -2.2283329 |
| N | 0.4907140  | 1.4160108  | -0.0281088 |
| N | 0.5232607  | -1.3440316 | -0.4301438 |
| C | -0.0725659 | 5.0537522  | 0.7424581  |
| C | 0.5345417  | 3.8831424  | 0.2655789  |
| C | -0.1762433 | -1.0293824 | -2.7651145 |
| C | 0.1781115  | -0.5082898 | -1.4953441 |
| C | 0.1522688  | 0.9154842  | -1.2869690 |
| C | -0.6148695 | -0.1800032 | -3.7879678 |
| C | -1.3190855 | 4.9744281  | 1.3994154  |
| C | 0.0096428  | -5.0594409 | -0.7164652 |
| C | 1.1642473  | 0.6057815  | 0.8895702  |
| C | -0.1051130 | 2.6436042  | 0.4366652  |
| C | -0.2715333 | 1.7578014  | -2.3455178 |
| C | -1.3464581 | 2.5668456  | 1.0941853  |
| C | 1.8100124  | 1.1479435  | 2.0293792  |
| C | 2.3942516  | 0.3084218  | 2.9854718  |
| C | -1.3051545 | -5.1634394 | -0.2143252 |
| C | 1.1759414  | -0.8190009 | 0.6870618  |
| C | -0.6478140 | 1.2179797  | -3.5817428 |
| C | -2.0048266 | -4.0181113 | 0.2170113  |
| C | -0.0672619 | -2.6572943 | -0.3597259 |
| C | 2.4005813  | -1.0914953 | 2.7899536  |
| C | 1.7967146  | -1.6473341 | 1.6553141  |
| C | 0.6249062  | -3.8014818 | -0.7917373 |
| C | -1.9628688 | 3.7329065  | 1.5765629  |
| C | -1.3789073 | -2.7634509 | 0.1382344  |

vibrational spectrum of 4<sup>+</sup>

| mode | symmetry | wave number<br>cm**(-1) | IR intensity<br>km/mol | selection rules |       |
|------|----------|-------------------------|------------------------|-----------------|-------|
|      |          |                         |                        | IR              | RAMAN |
| 1    |          | -0.00                   | 0.00000                | -               | -     |
| 2    |          | -0.00                   | 0.00000                | -               | -     |
| 3    |          | -0.00                   | 0.00000                | -               | -     |
| 4    |          | -0.00                   | 0.00000                | -               | -     |
| 5    |          | 0.00                    | 0.00000                | -               | -     |
| 6    |          | 0.00                    | 0.00000                | -               | -     |
| 7    | a        | 8.33                    | 0.01498                | YES             | YES   |
| 8    | a        | 11.66                   | 0.06446                | YES             | YES   |
| 9    | a        | 12.78                   | 0.03181                | YES             | YES   |
| 10   | a        | 19.66                   | 0.12578                | YES             | YES   |
| 11   | a        | 37.16                   | 0.17248                | YES             | YES   |
| 12   | a        | 41.48                   | 0.04686                | YES             | YES   |
| 13   | a        | 42.95                   | 0.01057                | YES             | YES   |
| 14   | a        | 44.57                   | 0.00014                | YES             | YES   |
| 15   | a        | 92.46                   | 0.02716                | YES             | YES   |
| 16   | a        | 100.32                  | 0.03260                | YES             | YES   |
| 17   | a        | 102.13                  | 0.00343                | YES             | YES   |
| 18   | a        | 103.05                  | 0.02253                | YES             | YES   |
| 19   | a        | 113.67                  | 0.08079                | YES             | YES   |
| 20   | a        | 116.30                  | 0.02906                | YES             | YES   |
| 21   | a        | 120.88                  | 0.34221                | YES             | YES   |
| 22   | a        | 125.64                  | 0.01312                | YES             | YES   |
| 23   | a        | 125.79                  | 0.02862                | YES             | YES   |
| 24   | a        | 131.17                  | 0.11993                | YES             | YES   |
| 25   | a        | 131.36                  | 0.03661                | YES             | YES   |
| 26   | a        | 146.85                  | 0.00272                | YES             | YES   |
| 27   | a        | 149.85                  | 0.08585                | YES             | YES   |
| 28   | a        | 203.63                  | 0.43307                | YES             | YES   |
| 29   | a        | 206.39                  | 3.14897                | YES             | YES   |
| 30   | a        | 214.20                  | 1.44387                | YES             | YES   |
| 31   | a        | 240.80                  | 0.00708                | YES             | YES   |
| 32   | a        | 246.64                  | 0.68496                | YES             | YES   |
| 33   | a        | 247.69                  | 2.88501                | YES             | YES   |
| 34   | a        | 251.88                  | 0.00513                | YES             | YES   |
| 35   | a        | 261.26                  | 0.00788                | YES             | YES   |
| 36   | a        | 261.55                  | 0.00778                | YES             | YES   |
| 37   | a        | 264.42                  | 0.00628                | YES             | YES   |
| 38   | a        | 265.23                  | 0.00663                | YES             | YES   |
| 39   | a        | 272.37                  | 0.36552                | YES             | YES   |
| 40   | a        | 274.55                  | 0.10726                | YES             | YES   |
| 41   | a        | 294.43                  | 0.01285                | YES             | YES   |
| 42   | a        | 296.61                  | 0.04292                | YES             | YES   |
| 43   | a        | 297.38                  | 0.55470                | YES             | YES   |
| 44   | a        | 299.80                  | 0.32318                | YES             | YES   |
| 45   | a        | 316.07                  | 5.01787                | YES             | YES   |
| 46   | a        | 323.01                  | 0.06805                | YES             | YES   |
| 47   | a        | 325.49                  | 2.74161                | YES             | YES   |
| 48   | a        | 335.44                  | 0.00546                | YES             | YES   |
| 49   | a        | 341.95                  | 1.24026                | YES             | YES   |
| 50   | a        | 347.71                  | 1.87806                | YES             | YES   |
| 51   | a        | 355.21                  | 0.74904                | YES             | YES   |
| 52   | a        | 357.38                  | 1.67042                | YES             | YES   |
| 53   | a        | 365.58                  | 0.21651                | YES             | YES   |



|     |   |         |           |     |     |
|-----|---|---------|-----------|-----|-----|
| 54  | a | 375.96  | 0.92916   | YES | YES |
| 55  | a | 376.99  | 0.32829   | YES | YES |
| 56  | a | 382.50  | 1.07189   | YES | YES |
| 57  | a | 397.42  | 0.01182   | YES | YES |
| 58  | a | 423.08  | 0.12915   | YES | YES |
| 59  | a | 426.50  | 0.12251   | YES | YES |
| 60  | a | 428.29  | 0.90412   | YES | YES |
| 61  | a | 435.82  | 1.21866   | YES | YES |
| 62  | a | 438.26  | 1.64197   | YES | YES |
| 63  | a | 453.98  | 6.75224   | YES | YES |
| 64  | a | 460.08  | 4.42443   | YES | YES |
| 65  | a | 465.70  | 1.36143   | YES | YES |
| 66  | a | 468.01  | 0.80040   | YES | YES |
| 67  | a | 482.06  | 0.13627   | YES | YES |
| 68  | a | 494.20  | 0.00778   | YES | YES |
| 69  | a | 500.81  | 0.02925   | YES | YES |
| 70  | a | 508.55  | 1.82888   | YES | YES |
| 71  | a | 569.46  | 0.32519   | YES | YES |
| 72  | a | 570.57  | 0.00497   | YES | YES |
| 73  | a | 596.52  | 0.20922   | YES | YES |
| 74  | a | 607.06  | 11.22418  | YES | YES |
| 75  | a | 608.12  | 0.77165   | YES | YES |
| 76  | a | 610.09  | 0.03652   | YES | YES |
| 77  | a | 617.91  | 6.42916   | YES | YES |
| 78  | a | 617.99  | 2.26693   | YES | YES |
| 79  | a | 621.57  | 0.07198   | YES | YES |
| 80  | a | 621.86  | 0.41392   | YES | YES |
| 81  | a | 650.50  | 5.81310   | YES | YES |
| 82  | a | 690.20  | 42.00695  | YES | YES |
| 83  | a | 691.62  | 0.06389   | YES | YES |
| 84  | a | 702.83  | 12.66038  | YES | YES |
| 85  | a | 776.90  | 1.87711   | YES | YES |
| 86  | a | 777.28  | 1.84314   | YES | YES |
| 87  | a | 806.60  | 0.02110   | YES | YES |
| 88  | a | 819.51  | 79.16072  | YES | YES |
| 89  | a | 924.19  | 0.88044   | YES | YES |
| 90  | a | 930.71  | 37.47515  | YES | YES |
| 91  | a | 1007.16 | 86.36385  | YES | YES |
| 92  | a | 1007.65 | 4.61522   | YES | YES |
| 93  | a | 1009.62 | 231.83250 | YES | YES |
| 94  | a | 1040.32 | 61.46722  | YES | YES |
| 95  | a | 1090.10 | 531.48731 | YES | YES |
| 96  | a | 1105.46 | 164.39094 | YES | YES |
| 97  | a | 1133.83 | 12.44582  | YES | YES |
| 98  | a | 1159.35 | 12.42098  | YES | YES |
| 99  | a | 1182.61 | 2.54163   | YES | YES |
| 100 | a | 1185.47 | 2.79433   | YES | YES |
| 101 | a | 1197.51 | 2.82546   | YES | YES |
| 102 | a | 1217.12 | 40.31775  | YES | YES |
| 103 | a | 1244.10 | 40.60787  | YES | YES |
| 104 | a | 1250.17 | 0.00278   | YES | YES |
| 105 | a | 1334.42 | 3.56014   | YES | YES |
| 106 | a | 1335.83 | 0.23828   | YES | YES |
| 107 | a | 1343.30 | 82.94054  | YES | YES |
| 108 | a | 1348.44 | 9.75844   | YES | YES |

|     |   |         |            |     |     |
|-----|---|---------|------------|-----|-----|
| 109 | a | 1348.75 | 8.16220    | YES | YES |
| 110 | a | 1352.55 | 0.11243    | YES | YES |
| 111 | a | 1360.08 | 25.47553   | YES | YES |
| 112 | a | 1360.70 | 1.53164    | YES | YES |
| 113 | a | 1374.62 | 1.64479    | YES | YES |
| 114 | a | 1444.64 | 2.58713    | YES | YES |
| 115 | a | 1461.86 | 0.82946    | YES | YES |
| 116 | a | 1469.17 | 2.63544    | YES | YES |
| 117 | a | 1499.08 | 0.75851    | YES | YES |
| 118 | a | 1510.56 | 1080.00889 | YES | YES |
| 119 | a | 1512.84 | 1312.28351 | YES | YES |
| 120 | a | 1520.05 | 107.36750  | YES | YES |
| 121 | a | 1522.60 | 156.27418  | YES | YES |
| 122 | a | 1529.85 | 178.80025  | YES | YES |
| 123 | a | 1530.69 | 550.66542  | YES | YES |
| 124 | a | 1531.25 | 29.59570   | YES | YES |
| 125 | a | 1584.43 | 116.30715  | YES | YES |
| 126 | a | 1604.29 | 0.27823    | YES | YES |
| 127 | a | 1609.88 | 2.90293    | YES | YES |
| 128 | a | 1610.94 | 23.71197   | YES | YES |
| 129 | a | 1628.02 | 7.54722    | YES | YES |
| 130 | a | 1628.55 | 0.65429    | YES | YES |
| 131 | a | 1634.74 | 20.66096   | YES | YES |
| 132 | a | 1635.27 | 22.14161   | YES | YES |

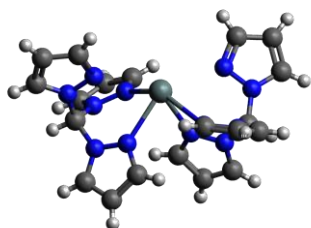

Atomic coordinates of  $6^{2+}$

|   |            |            |            |
|---|------------|------------|------------|
| N | -0.6932924 | 1.2008177  | 0.3240209  |
| C | 0.0000000  | 0.0000000  | 0.7665108  |
| N | -0.6932924 | -1.2008177 | 0.3240209  |
| N | 1.3865849  | 0.0000000  | 0.3240209  |
| H | 0.0000000  | 0.0000000  | 1.8710950  |
| N | -0.8414994 | 1.4575197  | -1.0108798 |
| N | 1.6829987  | 0.0000000  | -1.0108798 |
| N | -0.8414994 | -1.4575197 | -1.0108798 |
| C | -1.2671842 | -2.1948275 | 1.0728234  |
| C | -1.8032929 | -3.1233949 | 0.1845323  |
| C | -1.5151309 | -2.6242837 | -1.1035633 |
| C | 2.5343685  | 0.0000000  | 1.0728234  |
| C | 3.0302618  | 0.0000000  | -1.1035633 |
| C | 3.6065857  | 0.0000000  | 0.1845323  |
| C | -1.2671842 | 2.1948275  | 1.0728234  |
| C | -1.8032929 | 3.1233949  | 0.1845323  |
| C | -1.5151309 | 2.6242837  | -1.1035633 |
| H | -1.2525984 | 2.1695641  | 2.1711318  |
| H | -2.3372793 | 4.0482866  | 0.4368446  |
| H | -1.7619439 | 3.0517763  | -2.0859216 |
| H | 3.5238878  | 0.0000000  | -2.0859216 |

|    |            |            |            |
|----|------------|------------|------------|
| H  | 4.6745587  | 0.0000000  | 0.4368446  |
| H  | 2.5051969  | 0.0000000  | 2.1711318  |
| H  | -1.7619439 | -3.0517763 | -2.0859216 |
| H  | -1.2525984 | -2.1695641 | 2.1711318  |
| H  | -2.3372793 | -4.0482866 | 0.4368446  |
| Sn | 0.0000000  | 0.0000000  | -2.6041702 |

vibrational spectrum of  $6^{2+}$

| mode | symmetry | wave number<br>cm <sup>**</sup> (-1) | IR intensity<br>km/mol | selection rules |       |
|------|----------|--------------------------------------|------------------------|-----------------|-------|
|      |          |                                      |                        | IR              | RAMAN |
| 1    |          | -0.00                                | 0.00000                | -               | -     |
| 2    |          | -0.00                                | 0.00000                | -               | -     |
| 3    |          | -0.00                                | 0.00000                | -               | -     |
| 4    |          | -0.00                                | 0.00000                | -               | -     |
| 5    |          | -0.00                                | 0.00000                | -               | -     |
| 6    |          | 0.00                                 | 0.00000                | -               | -     |
| 7    | e        | 53.54                                | 0.93990                | YES             | YES   |
| 8    | e        | 53.54                                | 0.93990                | YES             | YES   |
| 9    | a2       | 75.59                                | 0.00000                | NO              | NO    |
| 10   | e        | 140.49                               | 1.99384                | YES             | YES   |
| 11   | e        | 140.49                               | 1.99384                | YES             | YES   |
| 12   | a2       | 147.67                               | 0.00000                | NO              | NO    |
| 13   | e        | 181.11                               | 11.04866               | YES             | YES   |
| 14   | e        | 181.11                               | 11.04866               | YES             | YES   |
| 15   | a1       | 187.07                               | 7.41178                | YES             | YES   |
| 16   | a1       | 240.76                               | 11.24162               | YES             | YES   |
| 17   | e        | 310.76                               | 3.83937                | YES             | YES   |
| 18   | e        | 310.76                               | 3.83937                | YES             | YES   |
| 19   | e        | 362.72                               | 3.73333                | YES             | YES   |
| 20   | e        | 362.72                               | 3.73333                | YES             | YES   |
| 21   | a1       | 378.70                               | 7.74882                | YES             | YES   |
| 22   | a2       | 577.49                               | 0.00000                | NO              | NO    |
| 23   | e        | 590.18                               | 10.59376               | YES             | YES   |
| 24   | e        | 590.18                               | 10.59376               | YES             | YES   |
| 25   | a2       | 615.06                               | 0.00000                | NO              | NO    |
| 26   | e        | 641.09                               | 1.16428                | YES             | YES   |
| 27   | e        | 641.09                               | 1.16428                | YES             | YES   |
| 28   | a2       | 753.99                               | 0.00000                | NO              | NO    |
| 29   | e        | 757.25                               | 84.56668               | YES             | YES   |
| 30   | e        | 757.25                               | 84.56668               | YES             | YES   |
| 31   | e        | 781.97                               | 59.14281               | YES             | YES   |
| 32   | e        | 781.97                               | 59.14281               | YES             | YES   |
| 33   | a2       | 849.37                               | 0.00000                | NO              | NO    |
| 34   | a1       | 849.88                               | 27.74844               | YES             | YES   |
| 35   | e        | 851.01                               | 6.07813                | YES             | YES   |
| 36   | e        | 851.01                               | 6.07813                | YES             | YES   |
| 37   | e        | 899.10                               | 1.70390                | YES             | YES   |
| 38   | e        | 899.10                               | 1.70390                | YES             | YES   |
| 39   | a1       | 906.48                               | 0.26203                | YES             | YES   |
| 40   | a2       | 908.59                               | 0.00000                | NO              | NO    |
| 41   | e        | 908.83                               | 0.02775                | YES             | YES   |
| 42   | e        | 908.83                               | 0.02775                | YES             | YES   |
| 43   | a1       | 983.41                               | 20.08434               | YES             | YES   |
| 44   | e        | 985.46                               | 33.25617               | YES             | YES   |
| 45   | e        | 985.46                               | 33.25617               | YES             | YES   |

|    |    |         |           |     |     |
|----|----|---------|-----------|-----|-----|
| 46 | e  | 1053.86 | 102.53560 | YES | YES |
| 47 | e  | 1053.86 | 102.53560 | YES | YES |
| 48 | a1 | 1065.91 | 59.70486  | YES | YES |
| 49 | a1 | 1098.97 | 4.69630   | YES | YES |
| 50 | e  | 1101.97 | 8.40485   | YES | YES |
| 51 | e  | 1101.97 | 8.40485   | YES | YES |
| 52 | e  | 1163.04 | 7.69938   | YES | YES |
| 53 | e  | 1163.04 | 7.69938   | YES | YES |
| 54 | a1 | 1207.04 | 2.48079   | YES | YES |
| 55 | e  | 1240.11 | 65.65646  | YES | YES |
| 56 | e  | 1240.11 | 65.65646  | YES | YES |
| 57 | e  | 1277.59 | 193.90484 | YES | YES |
| 58 | e  | 1277.59 | 193.90484 | YES | YES |
| 59 | a1 | 1278.38 | 5.02503   | YES | YES |
| 60 | a1 | 1341.33 | 0.42495   | YES | YES |
| 61 | e  | 1360.98 | 3.06977   | YES | YES |
| 62 | e  | 1360.98 | 3.06977   | YES | YES |
| 63 | e  | 1400.77 | 56.22018  | YES | YES |
| 64 | e  | 1400.77 | 56.22018  | YES | YES |
| 65 | a1 | 1425.87 | 153.17992 | YES | YES |
| 66 | e  | 1448.74 | 9.62944   | YES | YES |
| 67 | e  | 1448.74 | 9.62944   | YES | YES |
| 68 | a1 | 1455.43 | 37.17109  | YES | YES |
| 69 | e  | 1517.09 | 42.32759  | YES | YES |
| 70 | e  | 1517.09 | 42.32759  | YES | YES |
| 71 | a1 | 1522.58 | 0.24003   | YES | YES |
| 72 | a1 | 3093.38 | 5.96843   | YES | YES |
| 73 | e  | 3170.51 | 0.55375   | YES | YES |
| 74 | e  | 3170.51 | 0.55375   | YES | YES |
| 75 | a1 | 3170.67 | 18.85665  | YES | YES |
| 76 | e  | 3177.14 | 1.96618   | YES | YES |
| 77 | e  | 3177.14 | 1.96618   | YES | YES |
| 78 | a1 | 3177.67 | 57.42276  | YES | YES |
| 79 | e  | 3196.34 | 62.35600  | YES | YES |
| 80 | e  | 3196.34 | 62.35600  | YES | YES |
| 81 | a1 | 3196.70 | 11.03316  | YES | YES |

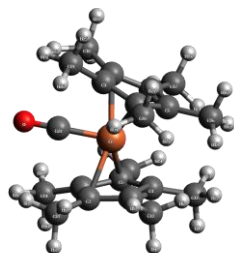

Atomic coordinates of  $7^{2+}$

|    |          |          |          |
|----|----------|----------|----------|
| Fe | 0.28014  | -0.25475 | 0.01408  |
| O  | 2.44986  | -2.22779 | 0.12510  |
| C  | -1.02231 | 0.63403  | -1.52176 |
| C  | 0.31932  | 1.19565  | -1.59953 |
| C  | 1.22679  | 0.12950  | -1.88305 |
| C  | 0.43088  | -1.11813 | -1.97098 |
| C  | -0.93657 | -0.80295 | -1.66451 |
| C  | -0.82033 | 1.02372  | 1.42806  |
| C  | -1.24324 | -0.36407 | 1.55459  |

|   |          |          |          |
|---|----------|----------|----------|
| C | -0.10582 | -1.13629 | 1.94294  |
| C | 1.04683  | -0.20908 | 2.04328  |
| C | 0.60824  | 1.09903  | 1.64525  |
| C | -2.28953 | 1.41154  | -1.59784 |
| H | -2.57823 | 1.44733  | -2.67666 |
| H | -2.18725 | 2.46027  | -1.26447 |
| H | -3.13608 | 0.92937  | -1.07003 |
| C | 0.66486  | 2.64802  | -1.61416 |
| H | 0.64154  | 3.01132  | -2.66863 |
| H | 1.68663  | 2.84129  | -1.23102 |
| H | -0.05552 | 3.26822  | -1.04596 |
| C | 2.66817  | 0.27442  | -2.24667 |
| H | 2.74324  | 0.47894  | -3.34074 |
| H | 3.26004  | -0.64080 | -2.04457 |
| H | 3.14502  | 1.12642  | -1.72129 |
| C | 0.89445  | -2.42159 | -2.53276 |
| H | 0.61781  | -2.43060 | -3.61418 |
| H | 0.38943  | -3.29012 | -2.06300 |
| H | 1.99079  | -2.56275 | -2.47286 |
| C | -2.08059 | -1.75946 | -1.76488 |
| H | -2.33530 | -1.91995 | -2.83866 |
| H | -2.99415 | -1.38133 | -1.26806 |
| H | -1.83091 | -2.75355 | -1.34007 |
| C | -1.72811 | 2.20314  | 1.39433  |
| H | -1.85279 | 2.54065  | 2.45218  |
| H | -2.74066 | 1.97277  | 1.01601  |
| H | -1.30820 | 3.06846  | 0.84427  |
| C | -2.65016 | -0.86192 | 1.51627  |
| H | -3.07233 | -0.82479 | 2.54810  |
| H | -2.71385 | -1.91633 | 1.18121  |
| H | -3.30926 | -0.24151 | 0.87824  |
| C | -0.12171 | -2.56281 | 2.38512  |
| H | -0.37835 | -2.59811 | 3.47020  |
| H | 0.85921  | -3.06487 | 2.26543  |
| H | -0.88979 | -3.15544 | 1.84820  |
| C | 2.36055  | -0.50221 | 2.68964  |
| H | 2.28561  | -0.17191 | 3.75327  |
| H | 3.19489  | 0.06791  | 2.23246  |
| H | 2.61794  | -1.57892 | 2.69746  |
| C | 1.43411  | 2.34197  | 1.72770  |
| H | 1.51240  | 2.66338  | 2.79272  |
| H | 0.98878  | 3.18517  | 1.16657  |
| H | 2.46924  | 2.17952  | 1.36281  |
| C | 1.59429  | -1.45000 | 0.08087  |

Vibrational spectrum of 7<sup>2+</sup>

| mode | symmetry | wave number<br>cm <sup>**</sup> (-1) | IR intensity<br>km/mol | selection rules<br>IR | RAMAN |
|------|----------|--------------------------------------|------------------------|-----------------------|-------|
| 1    |          | -0.00                                | 0.00000                | -                     | -     |
| 2    |          | -0.00                                | 0.00000                | -                     | -     |
| 3    |          | -0.00                                | 0.00000                | -                     | -     |
| 4    |          | -0.00                                | 0.00000                | -                     | -     |
| 5    |          | 0.00                                 | 0.00000                | -                     | -     |
| 6    |          | 0.00                                 | 0.00000                | -                     | -     |
| 7    | a        | 29.06                                | 0.46965                | YES                   | YES   |
| 8    | a        | 38.32                                | 0.00631                | YES                   | YES   |

|    |   |        |          |     |     |
|----|---|--------|----------|-----|-----|
| 9  | a | 115.09 | 0.03389  | YES | YES |
| 10 | a | 132.44 | 0.04924  | YES | YES |
| 11 | a | 136.11 | 0.41303  | YES | YES |
| 12 | a | 137.95 | 0.29730  | YES | YES |
| 13 | a | 139.56 | 0.23366  | YES | YES |
| 14 | a | 144.44 | 1.05610  | YES | YES |
| 15 | a | 146.40 | 0.20095  | YES | YES |
| 16 | a | 148.62 | 0.21976  | YES | YES |
| 17 | a | 158.73 | 1.30004  | YES | YES |
| 18 | a | 164.74 | 1.40604  | YES | YES |
| 19 | a | 165.30 | 3.33657  | YES | YES |
| 20 | a | 171.17 | 0.14519  | YES | YES |
| 21 | a | 179.28 | 0.91068  | YES | YES |
| 22 | a | 182.33 | 0.70547  | YES | YES |
| 23 | a | 190.84 | 2.54574  | YES | YES |
| 24 | a | 194.81 | 2.44351  | YES | YES |
| 25 | a | 199.60 | 6.39035  | YES | YES |
| 26 | a | 202.95 | 0.81361  | YES | YES |
| 27 | a | 217.68 | 7.87970  | YES | YES |
| 28 | a | 222.46 | 5.64760  | YES | YES |
| 29 | a | 228.68 | 7.35166  | YES | YES |
| 30 | a | 259.99 | 4.38791  | YES | YES |
| 31 | a | 267.88 | 0.69861  | YES | YES |
| 32 | a | 282.92 | 0.31124  | YES | YES |
| 33 | a | 287.58 | 0.34175  | YES | YES |
| 34 | a | 290.84 | 1.64798  | YES | YES |
| 35 | a | 292.92 | 0.78908  | YES | YES |
| 36 | a | 299.18 | 4.25805  | YES | YES |
| 37 | a | 300.21 | 1.54428  | YES | YES |
| 38 | a | 307.43 | 1.13052  | YES | YES |
| 39 | a | 320.80 | 10.82935 | YES | YES |
| 40 | a | 352.53 | 0.98709  | YES | YES |
| 41 | a | 397.23 | 5.10772  | YES | YES |
| 42 | a | 403.88 | 0.23512  | YES | YES |
| 43 | a | 418.76 | 1.72963  | YES | YES |
| 44 | a | 424.31 | 6.45335  | YES | YES |
| 45 | a | 471.54 | 8.58538  | YES | YES |
| 46 | a | 479.11 | 24.72951 | YES | YES |
| 47 | a | 516.94 | 0.20886  | YES | YES |
| 48 | a | 518.33 | 43.40861 | YES | YES |
| 49 | a | 524.35 | 13.08123 | YES | YES |
| 50 | a | 529.72 | 2.05303  | YES | YES |
| 51 | a | 531.19 | 5.59121  | YES | YES |
| 52 | a | 540.21 | 0.60805  | YES | YES |
| 53 | a | 541.10 | 0.26251  | YES | YES |
| 54 | a | 548.71 | 31.25708 | YES | YES |
| 55 | a | 590.14 | 0.00666  | YES | YES |
| 56 | a | 595.69 | 1.07824  | YES | YES |
| 57 | a | 596.23 | 0.23225  | YES | YES |
| 58 | a | 600.45 | 2.70894  | YES | YES |
| 59 | a | 606.52 | 3.05063  | YES | YES |
| 60 | a | 607.35 | 9.06640  | YES | YES |
| 61 | a | 789.21 | 0.95709  | YES | YES |
| 62 | a | 791.00 | 0.14487  | YES | YES |
| 63 | a | 805.11 | 0.84432  | YES | YES |

|     |   |         |           |     |     |
|-----|---|---------|-----------|-----|-----|
| 64  | a | 806.45  | 0.12415   | YES | YES |
| 65  | a | 930.47  | 0.19296   | YES | YES |
| 66  | a | 934.53  | 1.59251   | YES | YES |
| 67  | a | 937.91  | 0.63830   | YES | YES |
| 68  | a | 938.80  | 0.25474   | YES | YES |
| 69  | a | 971.82  | 60.05853  | YES | YES |
| 70  | a | 974.87  | 34.75253  | YES | YES |
| 71  | a | 981.22  | 52.81647  | YES | YES |
| 72  | a | 983.59  | 17.99517  | YES | YES |
| 73  | a | 988.38  | 2.38024   | YES | YES |
| 74  | a | 989.89  | 42.87003  | YES | YES |
| 75  | a | 993.07  | 5.05425   | YES | YES |
| 76  | a | 995.77  | 11.63808  | YES | YES |
| 77  | a | 995.81  | 0.52430   | YES | YES |
| 78  | a | 996.98  | 20.21081  | YES | YES |
| 79  | a | 1058.71 | 0.00912   | YES | YES |
| 80  | a | 1063.87 | 21.00914  | YES | YES |
| 81  | a | 1065.45 | 7.56463   | YES | YES |
| 82  | a | 1069.23 | 15.67131  | YES | YES |
| 83  | a | 1084.87 | 0.13376   | YES | YES |
| 84  | a | 1085.31 | 0.14683   | YES | YES |
| 85  | a | 1151.35 | 0.00167   | YES | YES |
| 86  | a | 1157.17 | 0.73248   | YES | YES |
| 87  | a | 1166.67 | 0.29982   | YES | YES |
| 88  | a | 1169.89 | 0.16435   | YES | YES |
| 89  | a | 1332.47 | 0.94220   | YES | YES |
| 90  | a | 1338.06 | 2.83136   | YES | YES |
| 91  | a | 1344.68 | 4.82094   | YES | YES |
| 92  | a | 1345.43 | 3.62488   | YES | YES |
| 93  | a | 1348.47 | 9.09367   | YES | YES |
| 94  | a | 1352.24 | 1.56251   | YES | YES |
| 95  | a | 1354.92 | 3.87046   | YES | YES |
| 96  | a | 1356.21 | 57.74589  | YES | YES |
| 97  | a | 1361.09 | 58.99204  | YES | YES |
| 98  | a | 1363.15 | 3.50108   | YES | YES |
| 99  | a | 1363.90 | 45.54358  | YES | YES |
| 100 | a | 1365.34 | 7.07047   | YES | YES |
| 101 | a | 1376.34 | 0.28085   | YES | YES |
| 102 | a | 1385.47 | 11.95542  | YES | YES |
| 103 | a | 1386.49 | 5.02770   | YES | YES |
| 104 | a | 1392.17 | 1.96318   | YES | YES |
| 105 | a | 1395.53 | 28.08286  | YES | YES |
| 106 | a | 1396.22 | 2.82207   | YES | YES |
| 107 | a | 1397.22 | 0.30861   | YES | YES |
| 108 | a | 1401.88 | 0.34417   | YES | YES |
| 109 | a | 1406.86 | 9.80479   | YES | YES |
| 110 | a | 1408.20 | 0.74044   | YES | YES |
| 111 | a | 1416.00 | 107.74436 | YES | YES |
| 112 | a | 1417.20 | 22.44785  | YES | YES |
| 113 | a | 1418.92 | 4.59489   | YES | YES |
| 114 | a | 1422.47 | 42.91637  | YES | YES |
| 115 | a | 1423.30 | 6.01810   | YES | YES |
| 116 | a | 1424.36 | 0.72761   | YES | YES |
| 117 | a | 1428.11 | 47.47421  | YES | YES |
| 118 | a | 1431.28 | 7.76701   | YES | YES |

|     |   |         |           |     |     |
|-----|---|---------|-----------|-----|-----|
| 119 | a | 1439.11 | 58.38195  | YES | YES |
| 120 | a | 1439.90 | 62.19115  | YES | YES |
| 121 | a | 1447.50 | 0.02311   | YES | YES |
| 122 | a | 1452.60 | 1.32973   | YES | YES |
| 123 | a | 1458.27 | 44.73375  | YES | YES |
| 124 | a | 1460.67 | 4.67593   | YES | YES |
| 125 | a | 1469.98 | 16.83700  | YES | YES |
| 126 | a | 1472.09 | 20.87544  | YES | YES |
| 127 | a | 1494.75 | 111.31982 | YES | YES |
| 128 | a | 1497.19 | 0.69000   | YES | YES |
| 129 | a | 2057.93 | 380.07304 | YES | YES |
| 130 | a | 2939.21 | 18.13025  | YES | YES |
| 131 | a | 2939.35 | 18.00180  | YES | YES |
| 132 | a | 2945.86 | 17.64658  | YES | YES |
| 133 | a | 2946.23 | 11.38949  | YES | YES |
| 134 | a | 2948.69 | 14.53422  | YES | YES |
| 135 | a | 2948.98 | 8.86764   | YES | YES |
| 136 | a | 2950.65 | 4.69882   | YES | YES |
| 137 | a | 2950.91 | 3.98211   | YES | YES |
| 138 | a | 2951.16 | 4.00631   | YES | YES |
| 139 | a | 2951.33 | 4.01845   | YES | YES |
| 140 | a | 3035.25 | 2.90520   | YES | YES |
| 141 | a | 3035.46 | 1.87425   | YES | YES |
| 142 | a | 3037.72 | 4.25285   | YES | YES |
| 143 | a | 3037.81 | 0.50357   | YES | YES |
| 144 | a | 3037.88 | 3.23667   | YES | YES |
| 145 | a | 3038.75 | 9.84227   | YES | YES |
| 146 | a | 3038.79 | 0.76083   | YES | YES |
| 147 | a | 3038.99 | 3.35749   | YES | YES |
| 148 | a | 3039.44 | 6.13131   | YES | YES |
| 149 | a | 3040.56 | 7.36174   | YES | YES |
| 150 | a | 3078.12 | 0.30620   | YES | YES |
| 151 | a | 3078.38 | 0.31044   | YES | YES |
| 152 | a | 3084.02 | 1.12621   | YES | YES |
| 153 | a | 3084.47 | 2.07141   | YES | YES |
| 154 | a | 3088.41 | 1.62627   | YES | YES |
| 155 | a | 3088.77 | 1.58357   | YES | YES |
| 156 | a | 3090.10 | 0.88439   | YES | YES |
| 157 | a | 3090.20 | 0.39211   | YES | YES |
| 158 | a | 3104.00 | 1.10310   | YES | YES |
| 159 | a | 3105.12 | 0.78396   | YES | YES |

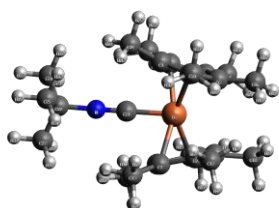

Atomic coordinates of  $8^{2+}$

|    |          |          |          |
|----|----------|----------|----------|
| Fe | -0.50962 | 0.43430  | -0.03382 |
| N  | 1.73099  | -1.60020 | 0.06291  |
| C  | -1.82025 | 1.36323  | -1.53871 |
| C  | -0.45826 | 1.85513  | -1.66479 |



|   |          |          |          |
|---|----------|----------|----------|
| C | 0.38346  | 0.74109  | -1.95625 |
| C | -0.47324 | -0.46463 | -1.99483 |
| C | -1.80961 | -0.07757 | -1.66629 |
| C | -1.54834 | 1.77810  | 1.36433  |
| C | -2.02522 | 0.41178  | 1.51715  |
| C | -0.91584 | -0.40179 | 1.89314  |
| C | 0.26433  | 0.48161  | 1.98432  |
| C | -0.11931 | 1.79884  | 1.57478  |
| C | -3.05135 | 2.20042  | -1.60697 |
| H | -3.36660 | 2.21849  | -2.67818 |
| H | -2.88989 | 3.25184  | -1.30744 |
| H | -3.90578 | 1.77833  | -1.04199 |
| C | -0.03924 | 3.28876  | -1.70913 |
| H | -0.06950 | 3.64362  | -2.76579 |
| H | 0.99935  | 3.43263  | -1.34979 |
| H | -0.71118 | 3.95081  | -1.12866 |
| C | 1.81574  | 0.81805  | -2.37499 |
| H | 1.86599  | 1.05299  | -3.46359 |
| H | 2.35530  | -0.13639 | -2.21737 |
| H | 2.36069  | 1.62193  | -1.83930 |
| C | -0.10062 | -1.80426 | -2.53682 |
| H | -0.48434 | -1.86913 | -3.58200 |
| H | -0.56789 | -2.63357 | -1.96722 |
| H | 0.99237  | -1.96284 | -2.57386 |
| C | -3.00174 | -0.97835 | -1.73127 |
| H | -3.27361 | -1.15821 | -2.79745 |
| H | -3.89137 | -0.54263 | -1.23875 |
| H | -2.79751 | -1.97020 | -1.27764 |
| C | -2.40562 | 2.99705  | 1.33304  |
| H | -2.48386 | 3.36128  | 2.38575  |
| H | -3.43747 | 2.80507  | 0.98743  |
| H | -1.96624 | 3.83103  | 0.75070  |
| C | -3.45318 | -0.02641 | 1.50640  |
| H | -3.85892 | 0.04681  | 2.54251  |
| H | -3.56658 | -1.08237 | 1.19012  |
| H | -4.09463 | 0.60922  | 0.86537  |
| C | -0.97856 | -1.82829 | 2.33332  |
| H | -1.19568 | -1.86987 | 3.42597  |
| H | -0.02379 | -2.36472 | 2.16415  |
| H | -1.78658 | -2.38395 | 1.81568  |
| C | 1.56166  | 0.15895  | 2.64796  |
| H | 1.51476  | 0.55893  | 3.68817  |
| H | 2.42380  | 0.64775  | 2.15073  |
| H | 1.74816  | -0.92884 | 2.72011  |
| C | 0.75703  | 3.00918  | 1.63859  |
| H | 0.84722  | 3.35180  | 2.69569  |
| H | 0.34913  | 3.85735  | 1.05643  |
| H | 1.78405  | 2.79651  | 1.27644  |
| C | 0.85674  | -0.80876 | 0.02707  |
| C | 2.85629  | -2.52680 | 0.15493  |
| C | 2.99326  | -3.26101 | -1.19388 |
| C | 2.55048  | -3.52812 | 1.28746  |
| C | 4.12183  | -1.69904 | 0.45984  |
| H | 1.61894  | -4.09630 | 1.08188  |
| H | 2.45960  | -3.01848 | 2.27024  |

|   |         |          |          |
|---|---------|----------|----------|
| H | 3.38683 | -4.25421 | 1.36227  |
| H | 4.31565 | -0.95264 | -0.33956 |
| H | 4.99574 | -2.38152 | 0.51277  |
| H | 4.03839 | -1.17378 | 1.43386  |
| H | 2.08047 | -3.84528 | -1.43301 |
| H | 3.84507 | -3.96968 | -1.12938 |
| H | 3.20810 | -2.55304 | -2.02277 |

Vibrational spectrum of  $8^{2+}$

| mode | symmetry | wave number<br>cm <sup>**</sup> (-1) | IR intensity<br>km/mol | selection rules |       |
|------|----------|--------------------------------------|------------------------|-----------------|-------|
|      |          |                                      |                        | IR              | RAMAN |
| 1    |          | -0.00                                | 0.00000                | -               | -     |
| 2    |          | 0.00                                 | 0.00000                | -               | -     |
| 3    |          | 0.00                                 | 0.00000                | -               | -     |
| 4    |          | 0.00                                 | 0.00000                | -               | -     |
| 5    |          | 0.00                                 | 0.00000                | -               | -     |
| 6    |          | 0.00                                 | 0.00000                | -               | -     |
| 7    | a        | 28.51                                | 0.04283                | YES             | YES   |
| 8    | a        | 30.89                                | 0.01479                | YES             | YES   |
| 9    | a        | 45.99                                | 0.01066                | YES             | YES   |
| 10   | a        | 77.96                                | 0.38181                | YES             | YES   |
| 11   | a        | 85.91                                | 0.33218                | YES             | YES   |
| 12   | a        | 116.04                               | 0.04339                | YES             | YES   |
| 13   | a        | 127.71                               | 0.10370                | YES             | YES   |
| 14   | a        | 134.93                               | 0.09922                | YES             | YES   |
| 15   | a        | 136.21                               | 0.08399                | YES             | YES   |
| 16   | a        | 138.04                               | 0.24824                | YES             | YES   |
| 17   | a        | 145.05                               | 1.15884                | YES             | YES   |
| 18   | a        | 146.81                               | 0.00905                | YES             | YES   |
| 19   | a        | 149.81                               | 0.43839                | YES             | YES   |
| 20   | a        | 158.71                               | 1.62656                | YES             | YES   |
| 21   | a        | 160.01                               | 0.52142                | YES             | YES   |
| 22   | a        | 164.59                               | 3.25638                | YES             | YES   |
| 23   | a        | 175.97                               | 0.13361                | YES             | YES   |
| 24   | a        | 178.49                               | 0.36981                | YES             | YES   |
| 25   | a        | 186.90                               | 2.31365                | YES             | YES   |
| 26   | a        | 189.03                               | 1.11642                | YES             | YES   |
| 27   | a        | 197.85                               | 1.67647                | YES             | YES   |
| 28   | a        | 198.91                               | 1.02461                | YES             | YES   |
| 29   | a        | 203.15                               | 0.26581                | YES             | YES   |
| 30   | a        | 211.87                               | 3.44384                | YES             | YES   |
| 31   | a        | 220.09                               | 7.17265                | YES             | YES   |
| 32   | a        | 228.97                               | 0.95035                | YES             | YES   |
| 33   | a        | 235.41                               | 3.09406                | YES             | YES   |
| 34   | a        | 263.02                               | 4.40842                | YES             | YES   |
| 35   | a        | 269.86                               | 1.52673                | YES             | YES   |
| 36   | a        | 277.32                               | 3.04344                | YES             | YES   |
| 37   | a        | 279.20                               | 0.42873                | YES             | YES   |
| 38   | a        | 282.83                               | 0.38047                | YES             | YES   |
| 39   | a        | 288.39                               | 0.53354                | YES             | YES   |
| 40   | a        | 290.19                               | 0.96804                | YES             | YES   |
| 41   | a        | 292.95                               | 0.62397                | YES             | YES   |
| 42   | a        | 300.02                               | 0.30602                | YES             | YES   |
| 43   | a        | 305.62                               | 6.72753                | YES             | YES   |
| 44   | a        | 306.84                               | 0.28001                | YES             | YES   |
| 45   | a        | 311.18                               | 2.00474                | YES             | YES   |

|     |   |         |          |     |     |
|-----|---|---------|----------|-----|-----|
| 46  | a | 317.96  | 14.74224 | YES | YES |
| 47  | a | 346.37  | 0.06824  | YES | YES |
| 48  | a | 350.05  | 3.96100  | YES | YES |
| 49  | a | 367.21  | 12.97708 | YES | YES |
| 50  | a | 391.66  | 5.87133  | YES | YES |
| 51  | a | 401.49  | 0.12205  | YES | YES |
| 52  | a | 413.23  | 2.29165  | YES | YES |
| 53  | a | 414.23  | 7.85622  | YES | YES |
| 54  | a | 419.01  | 4.85359  | YES | YES |
| 55  | a | 442.42  | 0.26795  | YES | YES |
| 56  | a | 475.13  | 8.71882  | YES | YES |
| 57  | a | 479.79  | 42.46444 | YES | YES |
| 58  | a | 502.03  | 13.33937 | YES | YES |
| 59  | a | 520.45  | 1.20469  | YES | YES |
| 60  | a | 525.15  | 0.71849  | YES | YES |
| 61  | a | 530.16  | 2.00211  | YES | YES |
| 62  | a | 533.38  | 0.76090  | YES | YES |
| 63  | a | 537.58  | 17.69667 | YES | YES |
| 64  | a | 540.92  | 1.46168  | YES | YES |
| 65  | a | 541.77  | 3.98483  | YES | YES |
| 66  | a | 589.83  | 0.16387  | YES | YES |
| 67  | a | 595.51  | 1.04408  | YES | YES |
| 68  | a | 597.89  | 0.16164  | YES | YES |
| 69  | a | 598.80  | 0.03077  | YES | YES |
| 70  | a | 604.90  | 0.55782  | YES | YES |
| 71  | a | 606.72  | 10.41458 | YES | YES |
| 72  | a | 732.57  | 2.25074  | YES | YES |
| 73  | a | 790.61  | 0.23842  | YES | YES |
| 74  | a | 792.52  | 0.07979  | YES | YES |
| 75  | a | 808.23  | 0.83152  | YES | YES |
| 76  | a | 809.34  | 0.00880  | YES | YES |
| 77  | a | 839.29  | 2.91448  | YES | YES |
| 78  | a | 908.32  | 0.97643  | YES | YES |
| 79  | a | 909.54  | 0.73640  | YES | YES |
| 80  | a | 932.29  | 0.58075  | YES | YES |
| 81  | a | 936.05  | 1.39215  | YES | YES |
| 82  | a | 941.45  | 1.37697  | YES | YES |
| 83  | a | 942.29  | 0.11443  | YES | YES |
| 84  | a | 943.08  | 0.03671  | YES | YES |
| 85  | a | 977.33  | 44.30748 | YES | YES |
| 86  | a | 980.18  | 37.22249 | YES | YES |
| 87  | a | 985.00  | 32.45477 | YES | YES |
| 88  | a | 988.11  | 17.89487 | YES | YES |
| 89  | a | 993.12  | 1.95242  | YES | YES |
| 90  | a | 994.31  | 36.58988 | YES | YES |
| 91  | a | 998.62  | 1.43657  | YES | YES |
| 92  | a | 1000.07 | 3.66361  | YES | YES |
| 93  | a | 1001.51 | 12.00849 | YES | YES |
| 94  | a | 1002.56 | 7.84657  | YES | YES |
| 95  | a | 1015.83 | 0.38670  | YES | YES |
| 96  | a | 1017.71 | 0.19501  | YES | YES |
| 97  | a | 1059.49 | 0.99348  | YES | YES |
| 98  | a | 1064.77 | 14.04467 | YES | YES |
| 99  | a | 1066.79 | 7.91709  | YES | YES |
| 100 | a | 1070.60 | 22.55749 | YES | YES |

|     |   |         |           |     |     |
|-----|---|---------|-----------|-----|-----|
| 101 | a | 1086.69 | 0.07303   | YES | YES |
| 102 | a | 1087.72 | 0.10063   | YES | YES |
| 103 | a | 1154.59 | 0.00970   | YES | YES |
| 104 | a | 1158.71 | 0.67103   | YES | YES |
| 105 | a | 1165.17 | 121.23028 | YES | YES |
| 106 | a | 1169.17 | 0.48246   | YES | YES |
| 107 | a | 1172.59 | 3.38267   | YES | YES |
| 108 | a | 1213.63 | 6.69828   | YES | YES |
| 109 | a | 1214.27 | 6.08564   | YES | YES |
| 110 | a | 1335.72 | 0.91639   | YES | YES |
| 111 | a | 1342.42 | 2.34756   | YES | YES |
| 112 | a | 1346.81 | 2.79755   | YES | YES |
| 113 | a | 1347.48 | 5.03845   | YES | YES |
| 114 | a | 1349.02 | 3.05167   | YES | YES |
| 115 | a | 1350.58 | 13.40545  | YES | YES |
| 116 | a | 1350.98 | 9.73100   | YES | YES |
| 117 | a | 1355.43 | 0.99282   | YES | YES |
| 118 | a | 1356.72 | 15.40074  | YES | YES |
| 119 | a | 1358.43 | 21.43083  | YES | YES |
| 120 | a | 1365.72 | 73.57461  | YES | YES |
| 121 | a | 1368.18 | 8.12871   | YES | YES |
| 122 | a | 1369.96 | 7.72064   | YES | YES |
| 123 | a | 1372.47 | 3.53131   | YES | YES |
| 124 | a | 1380.23 | 7.77330   | YES | YES |
| 125 | a | 1381.82 | 0.45097   | YES | YES |
| 126 | a | 1390.42 | 8.75413   | YES | YES |
| 127 | a | 1392.89 | 9.08165   | YES | YES |
| 128 | a | 1398.59 | 0.76171   | YES | YES |
| 129 | a | 1400.62 | 11.62381  | YES | YES |
| 130 | a | 1402.99 | 5.86776   | YES | YES |
| 131 | a | 1404.67 | 9.99868   | YES | YES |
| 132 | a | 1406.26 | 1.11211   | YES | YES |
| 133 | a | 1408.26 | 9.91512   | YES | YES |
| 134 | a | 1409.89 | 0.31813   | YES | YES |
| 135 | a | 1411.88 | 5.37176   | YES | YES |
| 136 | a | 1417.80 | 1.92287   | YES | YES |
| 137 | a | 1419.75 | 4.24565   | YES | YES |
| 138 | a | 1422.23 | 26.18947  | YES | YES |
| 139 | a | 1422.88 | 14.96104  | YES | YES |
| 140 | a | 1423.65 | 17.76947  | YES | YES |
| 141 | a | 1425.56 | 64.54860  | YES | YES |
| 142 | a | 1427.44 | 0.85004   | YES | YES |
| 143 | a | 1428.64 | 11.02295  | YES | YES |
| 144 | a | 1431.75 | 23.66732  | YES | YES |
| 145 | a | 1433.55 | 4.22520   | YES | YES |
| 146 | a | 1438.66 | 50.10805  | YES | YES |
| 147 | a | 1439.47 | 9.73828   | YES | YES |
| 148 | a | 1441.65 | 50.23077  | YES | YES |
| 149 | a | 1445.40 | 38.32128  | YES | YES |
| 150 | a | 1450.96 | 1.42649   | YES | YES |
| 151 | a | 1455.57 | 0.80680   | YES | YES |
| 152 | a | 1458.12 | 36.84105  | YES | YES |
| 153 | a | 1460.12 | 23.59590  | YES | YES |
| 154 | a | 1465.12 | 5.43653   | YES | YES |
| 155 | a | 1478.11 | 15.81024  | YES | YES |

|     |   |         |           |     |     |
|-----|---|---------|-----------|-----|-----|
| 156 | a | 1481.69 | 21.42583  | YES | YES |
| 157 | a | 1503.24 | 82.32146  | YES | YES |
| 158 | a | 1506.06 | 3.55927   | YES | YES |
| 159 | a | 2195.33 | 470.78371 | YES | YES |
| 160 | a | 2942.70 | 10.00558  | YES | YES |
| 161 | a | 2943.71 | 9.34728   | YES | YES |
| 162 | a | 2950.31 | 3.50753   | YES | YES |
| 163 | a | 2951.13 | 1.90124   | YES | YES |
| 164 | a | 2951.59 | 0.19950   | YES | YES |
| 165 | a | 2952.03 | 2.46177   | YES | YES |
| 166 | a | 2952.11 | 3.32054   | YES | YES |
| 167 | a | 2952.31 | 1.28930   | YES | YES |
| 168 | a | 2952.55 | 1.95875   | YES | YES |
| 169 | a | 2952.67 | 1.71701   | YES | YES |
| 170 | a | 2963.09 | 8.06681   | YES | YES |
| 171 | a | 2964.49 | 4.26875   | YES | YES |
| 172 | a | 2968.52 | 2.44161   | YES | YES |
| 173 | a | 3033.79 | 2.15848   | YES | YES |
| 174 | a | 3034.12 | 1.84931   | YES | YES |
| 175 | a | 3037.52 | 3.69175   | YES | YES |
| 176 | a | 3038.30 | 1.81060   | YES | YES |
| 177 | a | 3038.40 | 2.04733   | YES | YES |
| 178 | a | 3038.49 | 4.79894   | YES | YES |
| 179 | a | 3038.87 | 2.27582   | YES | YES |
| 180 | a | 3039.36 | 3.34071   | YES | YES |
| 181 | a | 3039.83 | 5.48225   | YES | YES |
| 182 | a | 3041.17 | 8.13431   | YES | YES |
| 183 | a | 3054.31 | 5.35610   | YES | YES |
| 184 | a | 3055.49 | 6.01860   | YES | YES |
| 185 | a | 3060.12 | 8.66219   | YES | YES |
| 186 | a | 3062.41 | 0.34971   | YES | YES |
| 187 | a | 3065.49 | 6.99287   | YES | YES |
| 188 | a | 3068.61 | 2.01764   | YES | YES |
| 189 | a | 3077.72 | 0.87433   | YES | YES |
| 190 | a | 3077.93 | 3.14731   | YES | YES |
| 191 | a | 3081.01 | 1.97794   | YES | YES |
| 192 | a | 3083.25 | 2.15489   | YES | YES |
| 193 | a | 3084.90 | 2.71118   | YES | YES |
| 194 | a | 3087.79 | 2.71884   | YES | YES |
| 195 | a | 3095.31 | 2.01864   | YES | YES |
| 196 | a | 3103.28 | 1.36078   | YES | YES |
| 197 | a | 3105.10 | 1.57750   | YES | YES |
| 198 | a | 3105.96 | 1.55903   | YES | YES |

## S-5 References

- [1] I. Krossing, *Chem. Eur. J.* **2001**, *7*, 490.
- [2] J. Cosier, A. M. Glazer, *J. Appl. Crystallogr.* **1986**, *19*, 105.
- [3] a) G. M. Sheldrick, *Acta Crystallogr., Sect. A: Found. Crystallogr.* **2008**, *64*, 112; b) D. Kratzert, J. J. Holstein, I. Krossing, *J. Appl. Crystallogr.* **2015**, *48*, 933.
- [4] Daniel Kratzert, can be found under <https://www.xs3.uni-freiburg.de/research/finalcif>.
- [5] G. R. Fulmer, A. J. M. Miller, N. H. Sherden, H. E. Gottlieb, A. Nudelman, B. M. Stoltz, J. E. Bercaw, K. I. Goldberg, *Organometallics* **2010**, *29*, 2176.
- [6] a) M. von Arnim, R. Ahlrichs, *J. Chem. Phys.* **1999**, *111*, 9183; b) Becke, *Physical review. A, General physics* **1988**, *38*, 3098; c) A. Schäfer, H. Horn, R. Ahlrichs, *J. Chem. Phys.* **1992**, *97*, 2571; d) H. Schröder, A. Creon, T. Schwabe, *J. Chem. Theory Comput.* **2015**, *11*, 3163; e) R. Ahlrichs, M. Bär, M. Häser, H. Horn, C. Kölmel, *Chem. Phys. Lett.* **1989**, *162*, 165.
- [7] P. Deglmann, F. Furche, R. Ahlrichs, *Chem. Phys. Lett.* **2002**, *362*, 511.
- [8] M. Quiroz-Guzman, S. N. Brown, *Acta crystallographica. Section C, Crystal structure communications* **2010**, *66*, m171-3.
